# Supplementary material for: Transcriptome and metabolome analyses reveal anthocyanins pathways associated with fruit color changes in plum (Prunus salicina Lindl.)
Source: PeerJ. 2022 Dec 13;10:e14413. doi: 10.7717/peerj.14413 (PMC9756864; doi:10.7717/peerj.14413)
Supplement: Supplemental Information 3 [file peerj-10-14413-s003.xlsx]

## Sheet: Sheet1
Table S1 Operation parameters
Item	parameters
ESI source temperature	500°C
ion spray voltage (IS)	5500 V
curtain gas (CUR)	25psi
the collision-activated dissociation (CAD)	Highest
QQQ scans	MRM
The m/z range	500~1000
