# Supplementary material for: Transcriptome and metabolome analyses reveal anthocyanins pathways associated with fruit color changes in plum (Prunus salicina Lindl.)
Source: PeerJ. 2022 Dec 13;10:e14413. doi: 10.7717/peerj.14413 (PMC9756864; doi:10.7717/peerj.14413)
Supplement: Supplemental Information 4 [file peerj-10-14413-s004.xlsx]

## Sheet: Sheet1
Table S2 Raw data of Figure 1D, E, F and Figure 6
Figure 1D
	L value			a value			b value
Ch84	33	35	31	50	47	50	40	39	41
D	71	75	76	15	13	12	61	64	61
Figure 1E
	Weight (g)			Longitudinal diameter (mm)			Transverse diameter (mm)
Ch84	42.36	33.63	38.57	42.14	43.64	41.59	37.5	41.9	38.42
D	22.21	20.22	24.46	31.81	34.15	35.21	32.47	35.18	34.74
Figure 1F
	Young fruit stage			Colour-change stage			Maturation stage
Ch84-D	5.07	5.06	5.08	57.49	57.48	57.5	268.92	269.03	268.79
D	0.46	0.47	0.47	0.28	0.27	0.27	0.09	0.09	0.07
Figure 6
Metabolite ID	Ch84_young_r1	Ch84_young_r2	Ch84_young_r3	Ch84_Color chinging_r1	Ch84_Color chinging_r2	Ch84_Color chinging_r3	Ch84_Mature_r1	Ch84_Mature_r2	Ch84_Mature_r3	D_young_r1	D_young_r2	D_young_r3	D_Color chinging_r1	D_Color chinging_r2	D_Color chinging_r3	D_Mature_r1	D_Mature_r2	D_Mature_r3
p0-0609.1475-005.51-splash10-0udi-0229330000-53d04734507302a5cc72	4785.63	9	4345.62	9	10540	9	10204.3	14154	16301.6	1403.58	9	9	9	9	9	9	9	9
p0-0289.0711-006.07-splash10-0zmr-0940000000-d3ceabfd37434d9e2956	42222	28728	33929.2	50131.1	18067.8	12740.2	33462.6	37699.3	39224	21563.2	18788.5	13577	9	9070.9	4204.05	9	2990.2	3370.56
p1-0331.1538-005.36-splash10-03dr-0920000000-048ca7d04bc787a089e1	37518.9	49382.3	51262.9	14717.5	19007.5	32560.2	30346.9	7811.57	13565.6	27372	68500.7	35462	16574.1	10575	21192.3	14413.3	10497.2	11522.8
p0-0479.0842-005.98-splash10-01dj-0294200000-5094cdbdf5e70fdb9524	2241.71	2873.88	2047.22	13933	8691.65	20506.2	31362.8	33819.5	38042.4	2357.4	1847.18	1893.51	9	565.78	1500.24	9	9	9
p0-0299.0598-005.23-splash10-000i-0910000000-15737b1fda12c575fc4a	37441.6	40449.8	35409.1	13854.2	16188.8	20350.2	8290.78	12334.8	11759.1	3433.41	5136.15	3973.18	9	9	9	9	9	9
p0-0426.0283-000.83-splash10-0a7i-4942800000-9a0d934568da33a05070	34880.3	36496.3	32448.6	15533.6	31093	9	13267.1	15143.7	18749.4	20336.8	9	11026.7	15615.5	11148.6	9	16807.4	15131.6	9
p1-0225.1465-006.05-splash10-052f-2910000000-043a9ac3d6693ce7555a	9	7123.37	9	24986.4	36731.3	9	55140.3	35219.9	27423.2	6631.2	9	9	10680	6679.77	14409.4	5539.25	10085.5	13560.8
p0-0285.0408-005.65-splash10-00ts-0930000000-38cb26f5edb65b23fde2	18546.2	18223	17720.2	15389.8	14906.3	12688.1	10922.1	13633.7	10549.9	17379.9	14317.8	12856.6	7789.51	15507.4	5391.31	9	6642.92	14141.4
p1-0973.3156-000.87-splash10-004i-0229200000-c8763e85c57d90a13547	113.327	9	326.531	66596.1	29320.1	52888.3	77568.6	73994.7	104572	9	1838.15	4131.31	47690.5	89049.3	58447	119726	81593.2	109914
p0-0377.0833-003.62-splash10-004i-0921000000-b3bbeaa17e4ef40abbc2	48072.5	61218.5	24777.5	47394.9	47071.2	49422.4	60886.3	71386.7	63179.5	12140.8	10807.4	11972	9	21596	14616.2	19341.3	19552.2	9
p1-0209.0806-007.38-splash10-01qd-2900000000-894306c1d56bd00f12a6	72415.3	74949.1	65352.8	24276	14794.9	19196.6	11985.1	16373.1	13078.9	21980	25292.6	47567.2	57169.4	47093.5	48312.1	39575.5	23184.2	33010.9
p0-0279.0845-003.47-splash10-03di-0900000000-4bcd667478a80c20ed29	56197.2	33747.2	60378.5	24319.3	21433.3	27444.8	15964	13406.8	10776.8	16316	18605.4	21812.2	8730.14	5209.77	11167.5	6322.3	7486.41	3826.38
p1-0339.1076-005.62-splash10-0002-0900000000-f53e4c12a297188f6798	20208.7	28860.3	24977.9	18804.8	10289.9	20582.1	20014.8	14083.3	14950.9	85467.8	88493.1	133220	25846.5	33033.2	32177.4	16851.4	14040.2	20813.2
p0-0303.0537-004.92-splash10-00p0-0910000000-9397aa8b5a846d8ed85a	38932.6	73787.8	39664.6	20002.5	29322.2	24238.8	16883.4	17823.5	14386.5	6912.36	3028.43	9	1658.89	3136.64	9	1093.33	1647.12	9
p1-0261.1482-009.98-splash10-052r-0900000000-784c406e77dc1f9a2c94	9	9	9	20987.8	40343.4	28685.3	75252	68495.1	57842.1	6208.36	4900.43	3568.39	64538.2	24944	52496.3	24586.2	22192.2	27739.3
p1-0251.1640-007.06-splash10-00ls-1900000000-8288da127bd3d04e0c52	6277.13	6157.87	6705.36	18188	20307.2	18112.4	89484.1	74909.1	66296.5	3718.39	4715.3	6290.11	33535.8	24607.4	29400.5	44298.1	42722	42685.8
p0-0503.3392-010.30-splash10-0udi-0000190000-8212c1c860654061554a	4469.67	4187.87	3510.34	5214.47	3701.55	2187.47	2002.01	4130.03	4482.64	44947.7	74528.3	61758.2	20029.5	25703.3	27897.1	116468	168380	78934.4
p1-0123.0432-002.22-splash10-004i-9000000000-2185921d069ec4ad04f0	9	9	9	98560.6	63380.4	88863	97175	71560.1	109136	9	39290.2	34981.7	9	40192.5	55019.2	66244.5	33334.2	45947.5
p0-0287.0546-006.56-splash10-004i-0910000000-6a5827dc190f02f578c2	93290.1	82317.6	88321.1	54126.3	45826.2	35784.8	35046.4	32265.2	41053.1	31880.3	18734.8	14994.8	9	5620.13	6496.73	3656.28	4902.5	4765.76
p1-0267.1592-005.71-splash10-0007-2900000000-f2ebdeacdd0dd2343442	15068.8	14776.2	14566.3	15192.5	5022.5	9357.63	10248.7	19908.9	8886.73	168534	154610	296038	64675.8	56267.4	80138.7	40467.8	36782.3	34117.2
p1-0137.0580-004.16-splash10-05ru-9000000000-c19660a6daea86ea907b	67640.8	48415.8	41873.3	51895.8	44966.9	205427	442326	359526	254102	83930.2	43780.7	51546.9	126785	118950	127647	123953	319564	42742.6
p1-0153.0536-005.80-splash10-014i-9000000000-45bd7b4449d034640d15	15343.7	25089.8	15783.7	9	9	17398.9	9	9	11972.1	239258	197694	200862	82441.2	75706.5	85192.8	9	65820.9	58604.6
p1-0393.2945-012.41-splash10-0007-0906000000-27725c27efeed55e5278	69990.2	55908.4	72026.9	41861.3	56087.6	38727	22555.3	21690	25726.3	124731	127719	158974	18839.8	21417.3	24673.8	18398.2	13854.8	12462.6
p0-0269.0460-003.97-splash10-053v-0930000000-5bae553be23b47a588e3	9	9	5481.72	47712.1	35486.8	35712.8	405109	323508	469588	5576.05	7466.44	4967.87	9	8918.05	4878.27	9	6470.85	9
p0-0472.1464-005.09-splash10-002p-3941200000-ab01ac5394e0b688f3e2	43481.8	74459.7	40098.6	83530.8	30993.5	110877	70830.4	71275	53930.5	114624	9	175181	95619.8	9	154034	89700.1	79144.4	9
p1-0568.4276-013.20-splash10-002r-0953100000-9cdeb7d680e9fbfa0b44	73888.9	2861.52	31404.9	289098	77215.8	9	337092	31119.3	3074.97	4551.98	65432.5	710.964	308381	24224	70406.5	90518.8	80506.7	21606.4
p0-0206.0747-005.77-splash10-0f6w-5900000000-18d1ee360955874e45ac	182243	171289	183275	72701.8	57868.4	59000.2	45642.5	42608.5	44158.4	170989	156139	155689	55747.1	31660.1	55788	27052.7	40728.1	26869.6
p0-0461.1074-006.88-splash10-03dj-0040900000-c07d9bfd608bb6c2da25	103760	107378	107518	75793.3	100674	79410.2	65407.5	69506.2	79238	94957.7	108112	127641	45812.8	43040.2	45569	26288.7	22650	27173.1
p1-0503.3351-010.84-splash10-0fka-0683920000-e1715f2774682dcc6541	7188.88	8129.63	7061.1	16813.5	10155.7	12685.4	22914.1	77359.4	15086.4	19256.8	44333.4	16712.8	10998	55161.1	11244.5	284127	804577	103906
p0-0455.0973-004.46-splash10-06r2-4491200000-5a61c15f7d345463a754	90679.3	87547.5	89676.5	83804.8	86522.7	79465.9	84540	81028	72900.4	106170	89124.4	99106.4	106359	81556.1	100734	125455	104908	108449
p1-0285.1694-005.71-splash10-0apu-2910000000-2df328a9400a43d9c4fb	24931.8	26429.4	26536.6	17296.5	14020	14308.2	13464.4	12419.2	16513	300568	277499	488304	122131	88349.9	158068	65971.6	65316.1	55402
p0-0283.0246-004.32-splash10-06w9-0890000000-74814d8acc7a6b32bab7	9	5679.51	2323.61	127712	75466.1	109171	282041	289700	185137	9	9	9	9	1105.62	9	1057.47	9	794.695
p1-0249.0712-000.73-splash10-0fka-5900000000-c28266751ec8bc9825e1	60198.5	47369.5	42335.2	83611.3	86967.2	71611.8	65590.2	74634.3	47985.9	51578	37207.6	9	53732.5	59634.3	63556.3	50931.2	52545.1	56686
p1-0135.1189-006.49-splash10-002f-9100000000-513eb070c2982e658d9b	329021	410447	9	155146	194584	174644	234525	438005	437108	246923	162598	325077	353668	106426	158751	222316	124921	190055
p1-0127.0378-003.54-splash10-0f89-9000000000-3c552ae22e339874215b	129339	141907	111253	258849	147426	276125	317719	252407	152496	35632.8	84110.1	77929.4	52634.2	69203.7	106870	55646.2	98910.8	28355.5
p0-0323.0302-001.18-splash10-004j-9310000000-37ee526b67236b75acd6	258749	236442	262262	88967.3	68324.5	99379.5	71981.8	71534	61676.3	126436	118301	149375	83371.2	57672.6	67591.3	50646.4	43940.4	52483.2
p1-0245.1799-009.16-splash10-001i-9600000000-131d41e119f96c5f56e1	91976.5	82484.3	91729.2	120671	124716	114235	121773	114416	113162	106025	105855	114087	128950	130967	132808	133728	125570	116121
p0-0595.1222-005.79-splash10-0f6t-0007090000-0ed7c2a1f4c458524ad1	227244	409741	229667	105486	110486	402101	134230	113892	139424	36192.7	9	9	9	9	382.815	9	9	9
p0-0204.0325-003.84-splash10-0a4i-0900000000-6bde3ba7527442e2d904	87325.7	75864.4	70510.8	24814.9	28512.8	27346.8	27203.8	22565.7	26683.4	317252	260798	270027	78401.9	67445.4	84591.7	71084.5	60090.7	53987.3
p0-0182.0461-002.36-splash10-0a4i-2900000000-ce97b8eaf8e9bc9c30f2	161761	203460	197543	137006	164484	150191	119423	88990.3	108619	198231	152574	156699	98541.6	99435.7	142017	113642	83838.5	79317
p1-0333.2401-012.43-splash10-05o0-2900000000-2a0faf296eaa05d09d39	34734.3	9	28197.9	174745	116512	219001	167130	9	43685.8	48171.2	87055.4	42341.5	166639	29493.9	32608.1	43823.1	216014	20996.3
p0-0447.0940-006.18-splash10-000i-0090200000-c2cff408fa47d48fdb7a	261677	136083	174518	112561	84929.7	94923.7	113619	124443	147452	107642	304811	251100	62546.7	50054.7	58909.8	22982.5	33488.2	43409.3
p0-0135.0291-001.44-splash10-001i-2900000000-fbc451f819735728e817	115417	121203	89585.5	76776.2	100453	77405.7	54786.6	9	106787	122250	143770	128875	112790	90610.9	90314.9	59738	109389	89883.4
p1-0291.1952-010.10-splash10-0f72-0900000000-23caaed7c5e838508bbc	327538	283675	315959	109839	129674	99980.4	81484.8	80952.2	79561.5	263057	237692	321107	77515.7	59443.4	82211.4	39745.4	50638.3	46403.3
p0-0191.0370-006.46-splash10-0f92-1900000000-9c8615bcf86ff89e9344	22915.9	32851.4	19557.9	83553.4	3846.68	4859.57	7299.85	9130.66	7419.62	650253	820793	1.19554e+06	68794.2	77040.1	86456.5	23935.3	29670.5	18976.5
p1-0265.1484-004.29-splash10-0a6r-1900000000-648ce7e6eec42bd10113	155001	173180	165749	93496.3	87362.9	97199.6	97342.6	90690	75255.6	366508	449062	368591	137931	118207	126652	77496.5	98965.9	84903.9
p1-0153.1276-006.17-splash10-002f-9100000000-5e9a2945f9d7470cb10f	67998.8	151338	100765	56329.5	113658	53975.5	65398.7	82745.3	58930.3	601886	673938	1.33932e+06	226730	73282.5	182627	123719	146853	143973
p0-0151.0400-005.80-splash10-052r-2900000000-20061d31512e6de58df3	178986	266510	227373	132488	141836	132564	61090.6	56206	59636.5	71675.2	63127.6	50190.9	43808.5	26143.1	42501.3	23901.8	23333.4	25348.2
p1-0219.1006-005.90-splash10-0adi-0900000000-93e25b22f388b283003c	434775	385375	465177	190316	182643	152888	149987	154188	213748	379062	240326	183306	60863.2	72985.9	88782.1	94805.9	88449.4	60926.8
p1-0357.1314-008.13-splash10-0fri-0791000000-10960de39a891053005c	899558	710215	868393	96557.2	94480.9	102423	70396.7	38010.2	62641.7	36487	36774.7	59351.3	14395.5	7264.01	14929.8	9	2506.96	3672.2
p0-0303.0497-004.80-splash10-0fb9-0920000000-ea0bba9998cdda63cdab	541722	465699	470571	199309	244669	265588	179105	200174	151105	110726	105490	86823	44152.1	40696.3	47846.7	27746.9	27840.1	32054.1
p1-0291.0847-003.40-splash10-0075-0910000000-b16a21293ba3e32cec56	719954	725095	760931	240558	254731	333091	9	144738	174267	43777.8	30825.5	33336.4	18894.3	21466.1	28969.4	16892.9	16007.1	12689.3
p0-0547.2415-006.04-splash10-0005-0931020000-f00e6445676b412395aa	152589	173708	139593	119657	145592	169830	129608	134683	177098	216681	277030	312296	280267	255149	323560	276925	242685	207235
p1-0331.1540-007.53-splash10-0ug0-0970000000-1dd1b86f30ebdf8737ad	905340	790064	799908	48343.3	58141.1	53272.6	39092.5	28219	39761.4	110034	108352	209250	68336	65620.7	70680.4	43198.2	44997.5	42472.8
p0-0465.1050-005.25-splash10-0f79-0494200000-f8b0a5eed315f6e558a7	276544	280193	296531	250464	188381	186760	451919	400523	548575	181270	183682	182707	41975.3	25219.7	40404.1	19161.5	12684.2	22212
p0-0153.0186-003.46-splash10-0a4i-1900000000-d58418491f64954f88e7	84689.4	155992	134565	204556	186932	138395	504926	324183	172742	157948	155821	160341	124114	106654	116490	108318	81930.4	109408
p1-0136.0616-000.96-splash10-014i-3900000000-1df984cd5064ef50a00b	293647	458420	347514	264849	127580	133978	152012	224662	138446	258728	245098	538539	159468	145233	141985	107189	103573	140614
p1-0177.0907-010.21-splash10-0fw9-2930000000-c50909596922187dddaf	244756	210673	226914	349387	332805	307889	581553	440339	463022	268831	234475	166256	46397.1	9	44228.9	17599.2	11649.1	18472.3
p1-0277.1289-011.44-splash10-0aor-0900000000-ae280dd95055663543a8	236686	220889	207331	225928	245415	224861	219106	202161	200255	182101	178268	207152	211726	221481	231749	266241	232406	189852
p1-0335.0660-000.98-splash10-00dr-1914000000-f326ea251468744f7456	643443	711353	801788	338966	260791	343253	402734	325628	268463	277040	196823	270863	241568	239031	186679	217686	192134	229114
p1-0589.4717-013.91-splash10-000i-0344090000-e19d7601fcc8ef35f9ab	457483	474349	643997	136505	206469	138824	133655	186527	84976	347629	307481	460558	189289	124427	177347	117885	194989	105177
p1-0195.1742-006.02-splash10-0c3c-8900000000-7ff1b072dff0b8a484ad	199574	223662	202937	208845	223178	204475	202351	206924	168293	767049	683135	562923	211674	160585	309255	140287	228223	220057
p1-0120.0657-000.67-splash10-0a4i-9000000000-43da619cb007258ef90c	167110	182654	177832	431368	485679	481267	488107	503092	585619	147277	9	9	789874	340477	470951	565758	353953	527330
p1-0343.2275-011.76-splash10-0f6w-1911000000-0c9a70f838794ea578fe	541609	340216	582756	300670	372150	249187	195729	211323	200232	297443	210803	299360	132724	118400	161678	102261	99893.3	102808
p1-0289.0896-000.83-splash10-004i-4900000000-b7848b013087e9af2fe8	9	119063	92213.8	518671	527468	584642	509014	473061	580529	238833	179003	178371	208381	355213	273094	370054	337118	383521
p1-0384.0914-005.33-splash10-03di-0900000000-59632cfc69de7e521ea1	1.11973e+06	1.12222e+06	1.1289e+06	272148	220299	233178	194898	140158	134551	221751	208954	163452	65150.6	49180.8	58827.1	43493	43952.3	40773.5
p0-0177.0180-003.80-splash10-000x-8900000000-5818e4027f28914a15ca	63469.7	83265.3	59501	26784.7	45726.9	46060.1	44720.9	27104.9	9	543329	618321	678108	476631	408338	521642	318367	261518	282934
p1-0583.2532-011.23-splash10-001i-0020090000-d8a22699f4565719eddd	393708	356763	370917	299758	357304	328155	176611	205271	206638	235745	219744	190021	155285	121851	156233	168416	149847	155254
p0-0171.0303-000.68-splash10-0a4i-6900000000-3bd05feae6b372843ff8	414375	436384	445273	919475	1.43024e+06	1.29129e+06	1.13392e+06	1.04082e+06	1.13342e+06	84897.2	81766.3	61591.4	250523	214763	304229	425602	352266	411332
p0-0163.0403-008.16-splash10-014i-2900000000-5751a521cf44f772378f	121426	147635	93860.2	63578.2	64644.5	71662.4	50459.8	31240	55324.5	1.2601e+06	988348	1.15983e+06	392868	419107	549979	309231	265273	244612
p1-0459.1327-006.40-splash10-0002-0090000000-ca3dee6f48a57110b62a	853057	892529	796042	370693	465234	466556	266251	320977	344546	273698	258399	327376	95105.8	74224	75547	9	9	9
p1-0569.4300-012.66-splash10-00lj-0962100000-2157aaf8d10cbbd617e9	240330	9433.41	98484.7	962033	422366	182614	839395	206947	13198.3	12403.9	302626	5169.66	727700	94384.6	155640	230519	285066	70958.1
p1-0437.3409-012.24-splash10-0f79-0970200000-cd117321a4f7f65cdb5d	28016.5	9	9	131359	48513.4	536158	61394.9	32942.1	9	9	9	9	11909.1	9	29105.6	102859	252349	9
p1-0343.1541-008.78-splash10-0udr-0930000000-b7694b487fb52288957a	1.83885e+06	1.50879e+06	1.77807e+06	346136	514268	416651	323220	168359	312226	51824.2	38012.4	60885.2	29869.6	12217.5	25863.1	3809.62	2972.12	6842.48
p0-0285.0377-004.30-splash10-004j-0940000000-b8d74e0aa00609a896af	31227.7	4344.3	23908	598990	379822	439777	1.64658e+06	934687	1.58143e+06	7169.48	5902.72	5417.93	3138.39	3536.9	3211.86	7074.44	4171.8	9
p1-0233.1164-004.30-splash10-00dr-1900000000-4ea522c31b269dc07ecb	311823	288929	281364	202166	231240	230582	119340	163662	121188	706270	676170	534916	1.02506e+06	912705	895886	1.03987e+06	1.10131e+06	1.11225e+06
p1-0337.2736-013.21-splash10-05o1-9300000000-b120bc1f807b4d394088	369911	124988	161139	711254	385446	273709	616103	270816	77613.1	133962	254977	159333	615595	94675.3	283313	343613	220409	9
p0-0209.0705-000.84-splash10-0abi-9100000000-b31776889eb843889ee1	837549	931431	790136	1.28859e+06	1.54486e+06	1.92148e+06	995366	1.13532e+06	947256	883351	867745	1.00194e+06	324554	179701	502203	221968	309379	222485
p0-0346.0564-001.28-splash10-0059-7900000000-a95e445a68efe86755f7	1.2481e+06	1.07166e+06	1.05277e+06	502164	465722	466213	586163	541218	331072	387898	350314	369206	336194	298365	246312	367612	253055	303273
p1-0263.1382-006.69-splash10-0a6v-0910000000-0a081cfae5ad2144f5d7	15960.2	9470.1	9	407528	461431	439211	1.08816e+06	1.17516e+06	930792	30752	44942.4	58523.1	1.28199e+06	351662	684461	368721	578632	471123
p1-0225.0722-012.06-splash10-052f-0940000000-8082f63fc4088564a3d1	60445.3	27926.7	50014.3	66050.1	46729.6	77393.2	58763.7	9	51181.2	51379.4	35521.3	44119.7	38379.8	67413.8	9	40908.8	43150.3	42654.2
p1-0163.0648-005.18-splash10-0ugi-9500000000-d38487707cc9d4e9ae8c	95785.6	97718.9	101167	153674	243009	144803	136348	153494	154632	1.19983e+06	589536	681816	425394	279910	719720	769359	411831	454210
p1-0361.0942-009.24-splash10-0002-0930000000-39212e37776e20a9feb0	251205	9	231515	172689	158728	227396	85731	83231.9	87796.2	97134.8	125345	206731	5455.22	5066.41	7605.71	1976.87	2380.82	1812.62
p0-0147.0281-000.75-splash10-052r-9000000000-99b0455e23137de9b943	699821	634254	635760	492721	705082	571447	389869	361960	297306	983398	1.00845e+06	810299	264114	266047	497147	282628	280848	217814
p1-0457.1101-005.82-splash10-0a4i-0112900000-7719a4de41df0cb4a83b	759628	970726	737369	506791	369024	466235	407703	420533	381174	564431	598421	421366	248758	246803	325199	185692	201870	286659
p1-0532.3441-011.77-splash10-01q9-0644090000-89ec46f25c6e21c33103	1.0335e+06	861299	1.10158e+06	215788	230219	211824	124370	145816	162252	939056	793603	1.05254e+06	181495	148340	168642	184477	180214	162420
p1-0247.1321-005.16-splash10-0h00-0920000000-39f1be1bb0cdb951317f	9	1.26498e+06	1.30607e+06	324981	410787	430874	9	285007	372490	81575.8	56385.3	63618.3	9	39230.2	81379.8	13560	9	9
p1-0216.1004-009.62-splash10-00dj-3900000000-135b379c68142a2edcdd	1.7355e+06	1.63042e+06	1.65735e+06	49431.7	33139.1	43417.4	13837.2	18358.6	15687.8	985086	1.09537e+06	1.3967e+06	6756.05	5738.97	5153.89	5226.36	4360.97	2946.53
p0-0163.0512-003.87-splash10-014i-2900000000-397224442baf62f6b24c	1.07566e+06	1.21469e+06	1.18036e+06	284110	245436	246861	173497	155099	199026	2.65006e+06	2.35859e+06	2.912e+06	79320.9	74185.3	471250	44644.9	164575	32759.3
p1-0327.1585-011.80-splash10-00n0-1941000000-f5e26b279c7c18977f88	2.77718e+06	1.20901e+06	2.65645e+06	10806.2	12751.8	9650.57	7648.07	2625.14	7604.81	24528.8	17477.9	30788.2	1992	630.519	2192.37	9	9	944.52
p1-0133.1025-005.69-splash10-014i-7900000000-1b6ae38c6a1f3e38fe34	226657	169148	207188	242196	174132	358339	416673	333268	368243	9	208498	410588	590969	470632	490110	2.37134e+06	1.35103e+06	1.67768e+06
p1-0179.1060-011.33-splash10-0f79-2900000000-49377583a246caaf637a	3.36341e+06	2.96141e+06	3.32494e+06	139098	92207.7	89605.7	146486	60568.4	157588	267722	246434	199133	131740	126185	137329	131862	137051	120540
p1-0558.2544-005.62-splash10-03dr-0976000000-7061538158940eb7fc44	1.28396e+06	1.30395e+06	1.25712e+06	410278	562802	439612	282457	325913	337175	1.06174e+06	728301	806252	198524	149925	245081	175338	130057	108611
p1-0121.0637-005.68-splash10-004i-9000000000-2a8a8c77e9fca68e5f1a	1.3162e+06	1.27853e+06	1.13901e+06	641349	585840	788974	568905	568563	585703	386892	382783	492737	128449	112425	162638	132303	69281.7	9
p1-0406.2421-006.13-splash10-0aor-0930200000-b11e996c5fcab0fbd24a	486128	508363	505697	404252	382029	416390	455473	467101	382747	398113	404860	421550	879107	703598	651989	1.13769e+06	1.05975e+06	1.22337e+06
p1-0284.0982-002.52-splash10-0udi-0900000000-e6146946599aa95fe505	762286	2.02795e+06	1.96305e+06	1.08107e+06	776522	804507	1.01641e+06	500727	329601	3.68525e+06	1.77586e+06	5.26384e+06	448166	1.09908e+06	1.35387e+06	610586	128309	229168
p0-0291.1969-011.66-splash10-00kg-0690000000-5fc8925eca77ea0cae55	2.44118e+06	1.48597e+06	2.18811e+06	70730.4	18921	65011	3704.82	5735.66	2482.17	1.50853e+06	929044	1.23009e+06	14219.9	4627.92	13996.4	9	4041.72	2398.41
p0-0342.0912-003.77-splash10-001i-0900000000-7dd51582c45eb5793275	1.64857e+06	1.43321e+06	1.577e+06	273402	307845	389074	168280	131838	214227	684531	613728	820061	335635	326110	465846	208238	169946	196022
p1-0137.0576-006.94-splash10-00mo-9200000000-5db7567b9beba275dfab	1.40882e+06	1.11814e+06	1.19004e+06	697444	740022	686583	683054	438403	611143	369960	9	539708	505644	312703	497245	321288	301234	231681
p1-0303.1041-002.58-splash10-0f6x-0904000000-c8b03220dff1cba73243	602561	636269	575048	510983	582601	514583	469733	483091	401133	1.98526e+06	1.84387e+06	1.80335e+06	1.06715e+06	1.04916e+06	1.1008e+06	803463	875107	958908
p1-0469.1321-005.00-splash10-014i-0109600000-438759f0e85ee978ba10	934523	654216	950494	536543	714075	451988	389589	397339	397764	1.61416e+06	1.14432e+06	1.18222e+06	468065	404148	404574	459990	410946	425521
p1-0291.1219-005.42-splash10-0079-0900000000-e3b7cded9778c87b72e1	2.40902e+06	3.45579e+06	3.9879e+06	9	584721	715264	1.05049e+06	9	524312	280435	179579	180535	106640	84022.3	63662.1	9	50437.2	9
p1-0406.2064-004.88-splash10-0a4i-0743900000-5788b7187a08f255c58b	103082	103468	94514	114868	76047.2	62439.4	235235	156540	142325	265550	259424	347168	3.04361e+06	2.68734e+06	2.0553e+06	3.86579e+06	3.01631e+06	4.28136e+06
p1-0507.1126-006.55-splash10-0udi-0009000000-32776de54bc3fe7b1ceb	84258.5	864121	101909	247753	282159	7.30526e+06	615895	464234	2.06094e+06	96739.5	778162	268451	196462	686394	78208.8	47951.4	48309.6	34958
p1-0181.0858-010.57-splash10-014l-9600000000-536831fbd82ccfbd4ef9	233871	208009	285552	1.17479e+06	1.16143e+06	1.08742e+06	1.70796e+06	1.72452e+06	1.82781e+06	379875	402560	306450	820724	1.19766e+06	931460	1.01209e+06	995351	1.14214e+06
p1-0209.1529-004.96-splash10-0a59-9600000000-f911b640e6fbdf560ead	89693.7	86651	74534.4	83761.4	93976.6	73178	197002	181443	146561	299674	358656	401630	3.6207e+06	3.01713e+06	2.49921e+06	4.1786e+06	3.98289e+06	4.92096e+06
p1-0309.0943-005.32-splash10-0002-0900000000-ef3a0dd9bb5f05a33723	413176	610654	444353	2.88682e+06	1.69247e+06	2.82622e+06	2.06192e+06	2.18886e+06	2.7222e+06	22025.4	9	9	9	13583.7	9	9	20047.6	9
p0-0567.2101-006.84-splash10-0006-0109000000-27d56e89b93384b44524	1.61546e+06	1.65321e+06	1.46339e+06	526172	614089	573982	424020	448259	433832	603564	604366	849873	251797	200188	264157	155625	164679	151882
p0-0609.1493-006.18-splash10-0pb9-0007009000-09ea21b5bb924bf3a178	272981	435759	309506	1.18544e+06	1.01587e+06	2.01206e+06	3.77247e+06	3.30608e+06	3.96229e+06	148128	271955	207761	74439.1	117805	78463.6	36019.9	26971.4	40976.8
p1-0165.0905-006.03-splash10-0ar0-9200000000-6d2e35a5630f66801cba	580954	578369	559044	603728	736444	707955	616705	633982	617465	1.61845e+06	1.81017e+06	1.58767e+06	1.25132e+06	1.03404e+06	1.12627e+06	817301	906440	1.01526e+06
p1-0193.1578-006.11-splash10-05o1-3900000000-f06fb8b94eadeb8d96d5	405007	239403	209162	1.5154e+06	138326	155988	187909	39369.2	53544.1	9.54677e+06	308155	376208	2.5924e+06	2.25106e+06	2.22804e+06	5.49784e+06	4.76282e+06	4.65851e+06
p0-0147.0226-001.36-splash10-0pbi-9200000000-84f5538ba7da480a84ea	915429	716625	822699	918429	879056	867708	683093	674702	9	1.40214e+06	1.35815e+06	1.28065e+06	792935	763632	884740	679386	781157	677107
p0-0131.0359-002.98-splash10-000i-9000000000-dcf6fb97a116338b0a8b	892746	890857	805529	672448	565077	601487	544551	536282	603531	1.39719e+06	1.2703e+06	1.15365e+06	849026	1.01147e+06	1.00216e+06	1.11195e+06	1.10222e+06	993040
p1-0111.0550-001.14-splash10-001i-9000000000-7606858565012518d849	195378	157510	253330	9	9	9	9	9	9	9	7.53196e+06	8.20289e+06	339505	40220.9	255213	31922.3	82882.5	38922.7
p1-0412.2170-005.43-splash10-00ub-5910000000-fc34c7e72ca6fe5165ee	504787	762970	516213	328069	286459	405313	265070	305643	321215	2.76082e+06	3.48902e+06	2.70348e+06	749748	604094	1.00973e+06	914833	1.16897e+06	876477
p1-0289.0708-005.45-splash10-0079-0910000000-d6e984119dbcbd79a24c	2.62695e+06	2.91155e+06	2.49213e+06	929336	1.1833e+06	1.007e+06	1.09731e+06	924912	1.17996e+06	555897	487891	443246	232571	180422	248421	89362.3	258210	116364
p1-0383.0944-003.51-splash10-001i-0449000000-75d54231817d34063681	1.99906e+06	2.09566e+06	2.19806e+06	815151	826717	862699	663905	637765	625147	2.68409e+06	2.52891e+06	2.35638e+06	411030	387717	548983	282835	257424	301691
p1-0427.1569-005.40-splash10-014i-0190200000-39964c4f6acc87506800	1.19732e+06	1.68132e+06	1.35459e+06	1.11948e+06	735159	1.32234e+06	894418	703677	729675	1.46948e+06	3.4843e+06	3.40029e+06	1.46088e+06	47789	1.45253e+06	549496	514994	342948
p1-0337.0877-004.55-splash10-03di-0900000000-f9c7f397ecf42cec4f36	982902	856018	967633	296616	334559	273340	108267	144869	136832	4.52912e+06	4.86095e+06	3.79827e+06	1.64311e+06	1.37791e+06	1.51673e+06	991857	921782	1.01402e+06
p0-0452.2772-011.93-splash10-0a4i-0190100000-3168e52e30fea53ed815	1.51679e+06	1.15599e+06	1.38661e+06	1.15155e+06	972087	969192	1.19485e+06	1.03162e+06	1.06564e+06	671752	633707	979972	934592	533531	722266	655955	640895	500507
p1-0121.0638-002.22-splash10-0fb9-9100000000-326bd3676ac78264d733	329355	2.61637e+06	663106	304584	238390	554605	193982	145707	150981	6.45617e+06	4.84036e+06	4.88982e+06	895893	1.16856e+06	1.53501e+06	504650	313307	447141
p1-0399.1429-000.74-splash10-0udr-2690000000-044ff0ba4bb6c4be537d	2.80738e+06	2.94837e+06	2.95414e+06	3.70975e+06	6.29458e+06	5.85435e+06	1.77659e+06	2.52112e+06	2.07166e+06	417973	157996	93954.1	951222	470183	1.35194e+06	658125	691264	605146
p1-0135.0803-005.95-splash10-0006-9200000000-33573a90994f855800f0	629643	469034	623213	1.62029e+06	1.55235e+06	9	1.93102e+06	1.81094e+06	9	3.48085e+06	3.30587e+06	9	9	9	1.0575e+06	9	1.29746e+06	1.75835e+06
p1-0385.2370-012.27-splash10-0629-0920000000-0c7af8526b2ec09db29c	7331.55	1.09394e+07	11582.5	9	9	1.03165e+06	9	30697.2	9	9	308263	4128.2	38290.4	9	1561.37	262039	9	6506.28
p1-0181.1215-011.62-splash10-054o-9700000000-e20f2c58f77f2670879a	2.26965e+06	2.48775e+06	2.65085e+06	1.01562e+06	1.25939e+06	1.20084e+06	663570	769168	560120	1.49901e+06	1.45356e+06	1.26208e+06	234412	228422	362194	55849.2	100775	64536.5
p1-0273.1109-006.82-splash10-004i-0890000000-aad69002252d86ef4dc3	2.25224e+06	2.89603e+06	2.66776e+06	73903	72497.2	63812.3	93648.8	83166.8	114175	4.79958e+06	5.2853e+06	5.89313e+06	140173	54547.1	230466	12570.7	10861.6	9391.18
p1-0169.0494-004.47-splash10-00xr-5900000000-b06e5cc56603b322b099	1.7151e+06	1.48653e+06	1.75216e+06	546816	698580	533771	491504	278859	322546	5.24288e+06	4.59135e+06	4.43847e+06	1.10845e+06	1.0973e+06	1.18479e+06	882051	772299	798656
p1-0153.0540-005.24-splash10-00xr-8900000000-75d32310aaf1b433d1fa	1.26732e+06	666358	1.43338e+06	226495	175485	179641	56720.9	49741.9	76511.9	4.62878e+06	5.52628e+06	5.04795e+06	1.77377e+06	1.53287e+06	1.50367e+06	1.40658e+06	1.79288e+06	1.55067e+06
p0-0449.1090-004.95-splash10-0fbi-0691100000-d72af33148a8062614d6	3.30864e+06	3.06208e+06	2.98918e+06	1.21638e+06	1.42265e+06	1.24131e+06	747059	849973	1.42805e+06	2.82366e+06	2.92893e+06	2.91211e+06	481722	412615	608081	271262	259635	289867
p1-0183.1064-000.96-splash10-066r-9000000000-0de2373a25489cb6455a	1.87999e+06	2.99245e+06	2.80449e+06	9	9	1.95129e+06	1.13462e+06	2.12056e+06	9	520364	353988	805431	3.00151e+06	1.88228e+06	3.63485e+06	1.1466e+06	2.0986e+06	1.21852e+06
p1-0476.2125-006.61-splash10-014i-1900000000-0c1454eb786362408dfb	1.76195e+06	1.30861e+06	9	2.13519e+06	3.00269e+06	2.43034e+06	2.31478e+06	1.25695e+06	1.65175e+06	953859	1.63457e+06	9	2.18078e+06	1.24654e+06	1.43074e+06	9	792406	9
p1-0275.0551-003.93-splash10-0ufv-0940000000-c99b002e2dc11c4a2517	3.31585e+06	3.39556e+06	3.53572e+06	2.6398e+06	2.3979e+06	2.29833e+06	1.75712e+06	1.3414e+06	1.30701e+06	245208	147524	114653	157705	164869	175813	99103.9	97271.7	121549
p0-0564.3390-011.79-splash10-0fb9-0090040000-191cd4b58f9a80aa9a52	3.08833e+06	1.96704e+06	2.92236e+06	841910	1.26911e+06	1.01894e+06	540300	579725	575349	1.90237e+06	1.73733e+06	2.61731e+06	1.68754e+06	1.50575e+06	1.49452e+06	1.75247e+06	1.57176e+06	1.33209e+06
p1-0183.0892-000.72-splash10-014i-9000000000-d4ea0d19c7d009f158e1	2.55207e+06	3.20124e+06	2.48824e+06	5.10664e+06	5.96115e+06	5.63387e+06	2.98008e+06	2.85009e+06	3.45029e+06	998135	1.12723e+06	1.21448e+06	9	2.3214e+06	1.74407e+06	1.61575e+06	1.38908e+06	1.6781e+06
p0-0487.1454-004.12-splash10-0002-0901100000-a189701869187da543c6	1.71227e+06	1.17092e+06	1.6954e+06	7.76696e+06	6.66102e+06	7.52047e+06	9.50663e+06	7.4446e+06	8.46195e+06	267487	259139	388420	258638	179609	275920	197035	216090	227195
p1-0413.1507-007.67-splash10-0udi-0290000000-061dce0e4c9d2d902afe	5.99041e+06	7.97637e+06	5.4915e+06	296906	229543	352612	176613	151438	187299	388221	1.06985e+06	738029	9	9	9	9	9	9
p1-0134.0599-003.01-splash10-0a6r-5900000000-8e4f10325168c9d361fd	4.4345e+06	5.20049e+06	4.34422e+06	2.72019e+06	1.81458e+06	2.94459e+06	2.72166e+06	2.28519e+06	1.7799e+06	1.12702e+06	2.53758e+06	6.62952e+06	2.10363e+06	385244	2.68152e+06	1.13047e+06	1.01988e+06	755989
p1-0420.1884-005.22-splash10-00r7-7930000000-28cbc2d24ed1f9628cdf	1.91357e+06	1.73779e+06	9	1.60937e+06	1.89848e+06	2.01494e+06	1.49774e+06	1.77051e+06	1.66421e+06	2.23432e+06	1.93577e+06	3.21145e+06	2.50098e+06	1.92479e+06	2.42968e+06	2.77421e+06	3.0958e+06	2.14414e+06
p1-0369.0850-009.07-splash10-0002-0951000000-80cbb54301ad785970a0	1.8437e+06	1.69918e+06	1.64495e+06	1.02095e+06	948276	1.33088e+06	515576	481962	532717	577051	747319	1.25757e+06	30268.4	29991.6	53133.3	8420.85	12180.4	11051
p1-0148.0591-000.66-splash10-001i-9000000000-f49cd05ab08860b1c112	2.26807e+06	2.99559e+06	2.64869e+06	7.06067e+06	7.80102e+06	9.0029e+06	8.40578e+06	7.07172e+06	8.93347e+06	651735	867442	1.23182e+06	2.38622e+06	4.37017e+06	3.52355e+06	6.61098e+06	3.74282e+06	5.79156e+06
p1-0191.1794-011.46-splash10-0ap3-3900000000-160488eefe8333132555	82521.8	9	62791.3	82507.9	71046.7	64305.8	44032.5	69954.7	54000.4	73611.6	65090.7	74082.7	59383.5	63451.7	72181.9	76041.7	84350	63549.1
p1-0195.1009-011.56-splash10-0092-9600000000-88e6ba0f9a2d9328f9dc	2.60851e+06	2.39047e+06	2.64711e+06	3.0049e+06	3.13958e+06	2.94177e+06	2.91448e+06	3.05413e+06	2.91985e+06	3.05447e+06	2.69967e+06	2.79197e+06	3.04386e+06	3.03907e+06	2.92243e+06	3.1752e+06	3.17543e+06	2.94999e+06
p1-0335.2572-013.76-splash10-00sj-6910000000-1c25db51c6fe627198a0	1.03554e+06	943416	632991	2.0929e+06	3.3548e+06	5.13402e+06	3.11422e+06	4.83199e+06	740085	1.29726e+06	2.61581e+06	1.02839e+06	4.00841e+06	810083	725395	1.30731e+06	5.97753e+06	583671
p1-0177.0570-004.94-splash10-00kr-9800000000-55d99718b82eb6b430ff	3.80531e+06	3.17955e+06	4.23309e+06	737475	995363	823888	771366	754411	747802	1.63427e+07	1.68959e+07	1.30097e+07	3.58057e+06	3.25803e+06	2.75334e+06	2.41814e+06	2.46917e+06	2.33856e+06
p1-0209.0807-004.11-splash10-014i-0900000000-becf6f04f8b673c20251	8.28199e+06	9.19981e+06	7.53012e+06	3.75143e+06	4.3707e+06	3.60948e+06	3.21711e+06	2.75269e+06	3.15548e+06	1.93304e+06	2.53492e+06	2.69163e+06	646133	496000	722460	346277	288131	347217
p0-0476.2805-011.78-splash10-004i-0090000000-571b4d41ceef8d375f18	6.75063e+06	5.63245e+06	6.51295e+06	2.14701e+06	2.53285e+06	2.5059e+06	888618	841220	1.10595e+06	3.74158e+06	3.55709e+06	5.14696e+06	2.44789e+06	2.21874e+06	2.13899e+06	2.07199e+06	2.10542e+06	1.56697e+06
p0-0163.0772-007.67-splash10-0002-2900000000-58587c31be5def37c059	9.91261e+06	9.03744e+06	8.93604e+06	4.77066e+06	5.52271e+06	5.01937e+06	2.97149e+06	1.98689e+06	2.74888e+06	2.38503e+06	2.28595e+06	3.06748e+06	926746	677791	891479	357147	311414	323130
p1-0138.0541-000.74-splash10-0006-9200000000-ffa53f2c69a32c7677f2	2.83231e+07	3.33687e+07	2.31059e+07	5.40114e+06	8.82502e+06	7.77126e+06	4.2437e+06	3.91887e+06	3.17297e+06	1.11695e+06	936567	1.64328e+06	220903	173369	302312	189269	175999	189325
p0-0263.1345-007.93-splash10-0udi-0960000000-5fa39c8960d110b69a5c	226870	196586	204183	3.63895e+06	5.34173e+06	4.31049e+06	1.31426e+07	1.16334e+07	1.02048e+07	564129	565024	610256	4.2397e+06	2.57707e+06	3.53368e+06	2.85139e+06	3.66778e+06	3.76583e+06
p0-0135.0497-003.79-splash10-001r-2900000000-3934387998d55c34c02f	1.9494e+06	2.0619e+06	1.90766e+06	903659	894844	977639	658612	639696	690854	5.03305e+06	5.47939e+06	4.205e+06	4.12347e+06	2.79256e+06	3.80222e+06	3.26285e+06	2.41918e+06	3.01031e+06
p1-0453.3355-011.30-splash10-0pvr-0981200000-37a9f929f59873b50187	191315	218064	48066	2.19785e+06	899108	274656	375741	763733	1.08396e+06	250603	1.77462e+06	1.83631e+06	2.49539e+06	1.51457e+06	1.27945e+06	1.06887e+07	1.62304e+07	3.96276e+06
p1-0475.1919-004.56-splash10-0002-3900000000-7c4680e926b8a3211149	340476	313241	308205	9.03371e+06	5.70245e+06	9.90868e+06	7.61708e+06	9.17387e+06	5.98183e+06	42026.3	54555.2	36726	356398	55705.6	327842	711846	428501	182249
p1-0467.1182-004.59-splash10-000i-0913100000-fa996e5126e84384e705	36577.6	9	31032.7	3.91268e+06	2.64331e+06	2.74753e+06	1.3218e+07	1.16431e+07	1.30459e+07	20970.6	60527.6	9	26000.4	23143.1	22460.7	16356.6	9	9
p1-0454.2928-011.94-splash10-03di-0019000000-c18ccc6b7963636109a7	4.90443e+06	3.98214e+06	5.24783e+06	3.96576e+06	3.51359e+06	2.61031e+06	4.52661e+06	3.03094e+06	4.07158e+06	2.72272e+06	2.06638e+06	3.3254e+06	2.49195e+06	2.13672e+06	2.55235e+06	2.3387e+06	2.1819e+06	1.99547e+06
p0-0146.0466-000.65-splash10-0udi-3900000000-fd2d83b3a0f66f890f19	5.34475e+06	5.42517e+06	5.67357e+06	5.97474e+06	7.98156e+06	7.88061e+06	9.38681e+06	7.96843e+06	7.78758e+06	1.71051e+06	1.64025e+06	1.69677e+06	4.01839e+06	2.17298e+06	5.46376e+06	6.33678e+06	4.59892e+06	4.76317e+06
p1-0480.1474-004.55-splash10-001i-0003900000-d973725a9ca9664af531	416140	339740	423944	1.21627e+07	7.4913e+06	1.54582e+07	1.12196e+07	1.36681e+07	9.57374e+06	26025.4	42222.1	33204.9	577530	91496.1	511444	1.00986e+06	683559	357557
p1-0247.1321-004.13-splash10-0h01-1920000000-515832e4c6777e3c21f2	5.42936e+06	5.18024e+06	8.01162e+06	5.59832e+06	6.21334e+06	5.87895e+06	3.65548e+06	3.32549e+06	4.46278e+06	823668	392716	351318	390162	431277	364744	190698	223863	329282
p1-0397.3822-013.47-splash10-0002-2935000000-c1028d28479a5ed96c5c	4.15429e+06	3.37996e+06	3.58037e+06	3.93863e+06	4.3933e+06	4.78718e+06	3.81133e+06	4.16633e+06	3.24798e+06	4.3885e+06	3.55362e+06	3.81612e+06	4.23632e+06	3.43577e+06	3.72189e+06	4.33372e+06	4.67611e+06	3.07995e+06
p1-0355.1022-004.33-splash10-01p6-0981000000-b9522737e66e865f1355	1.04159e+06	1.63252e+06	781565	323943	513029	357039	151453	184865	171952	3.74124e+07	3.87095e+07	2.82196e+07	2.2429e+07	1.8829e+07	2.153e+07	2.25252e+07	1.74289e+07	1.44896e+07
p1-0474.1737-003.79-splash10-004i-0019000000-7c5783e5b1ef1037694f	7.34496e+06	7.3016e+06	7.04253e+06	2.97418e+06	2.41581e+06	2.75333e+06	2.27577e+06	2.8665e+06	2.97114e+06	5.52596e+06	5.80371e+06	5.65168e+06	5.46016e+06	5.15152e+06	4.66689e+06	6.16429e+06	6.16724e+06	5.62645e+06
p1-0391.2860-011.82-splash10-0002-0900000000-650d424c1e7d593f8c93	2.19325e+06	1.95033e+06	2.98157e+06	6.9978e+06	5.30844e+06	5.71131e+06	5.52758e+06	3.58806e+06	2.09592e+06	3.74484e+06	4.08275e+06	4.29948e+06	4.78701e+06	2.63635e+06	3.0195e+06	5.70496e+06	5.9027e+06	2.93079e+06
p1-0207.1009-006.39-splash10-0udi-3900000000-c012145656d6fd5aff12	7.72433e+06	8.36133e+06	7.17205e+06	5.47255e+06	5.02446e+06	4.97423e+06	4.56283e+06	5.04329e+06	5.33397e+06	7.79941e+06	9.02816e+06	1.05736e+07	2.74903e+06	2.67136e+06	3.24655e+06	2.60061e+06	2.2116e+06	2.15973e+06
p0-0448.0976-004.43-splash10-000i-0190000000-d0bc33ac458c21233361	3380.66	2253.58	12228.5	7.68595e+06	6.09674e+06	7.48347e+06	2.29623e+07	1.55574e+07	2.23982e+07	2389.58	2754.4	2194.69	3702.44	4521.26	3495.27	3809.16	1398.38	3374.14
p1-0165.0540-004.18-splash10-00xu-4900000000-77906910bd8657f161d7	1.2128e+06	1.24509e+06	1.20968e+06	454643	422534	453691	939935	1.45457e+06	1.26345e+06	1.46869e+07	1.51632e+07	1.60345e+07	6.14719e+06	5.41328e+06	6.83687e+06	4.2064e+06	4.08714e+06	3.84246e+06
p1-0133.0641-000.72-splash10-00di-9000000000-8b1acd095015e98eb4b2	3.24678e+06	3.54938e+06	7.44753e+06	3.90078e+06	5.2478e+06	4.1483e+06	2.1118e+06	1.62783e+06	1.49617e+06	4.63939e+06	2.60395e+06	1.85684e+06	5.03499e+06	466631	4.8741e+06	1.55396e+06	1.93994e+06	1.39996e+06
p0-0173.0471-003.57-splash10-0006-9400000000-0cb749e4ddedfe06a759	3.76655e+06	3.4912e+06	3.67566e+06	1.83981e+06	1.74258e+06	1.65718e+06	1.20302e+06	1.24691e+06	1.39639e+06	5.13375e+06	6.75475e+06	8.29019e+06	5.67815e+06	6.09223e+06	5.57793e+06	5.78539e+06	4.61288e+06	5.15747e+06
p1-0679.1845-011.00-splash10-004i-0000209000-b6600227816a678fffe2	2.39573e+07	3.4376e+07	9	6.70539e+06	5.58205e+06	7.78848e+06	3.69349e+06	1.95596e+06	3.76504e+06	18075.7	50967.9	9	9	8809.49	9	9	9	9
p1-0135.1152-006.96-splash10-004l-9110000000-1f911e69ed228e36c6db	109432	270292	305062	5.57787e+06	6.48981e+06	4.82211e+06	1.25147e+07	1.25047e+07	1.1152e+07	971777	9	1.14906e+06	1.95335e+07	1.42593e+07	1.47448e+07	2.22414e+07	1.9869e+07	2.26711e+07
p1-0256.2611-012.89-splash10-0a4i-7390000000-fca419c452f6b9905933	1.36838e+06	1.07854e+06	1.67108e+06	1.4122e+06	1.41261e+06	1.32446e+06	1.12041e+06	1.18624e+06	1.34573e+06	1.55031e+06	1.28339e+06	1.52483e+06	1.84652e+06	1.59961e+06	1.42656e+06	1.21946e+06	1.17358e+06	1.10861e+06
p1-0122.0955-003.50-splash10-004i-9400000000-9a73ce65ed9a89b45adf	5.02845e+06	8.92762e+06	4.60702e+06	1.59934e+06	1.34974e+06	1.61995e+06	1.18655e+06	951482	930167	1.49992e+07	2.36686e+07	1.71814e+07	4.16295e+06	2.62177e+06	4.09456e+06	1.82982e+06	1.68563e+06	2.28077e+06
p1-0167.0728-011.67-splash10-00fs-9400000000-abac100d27a730fde44d	6.31773e+06	5.86948e+06	6.26589e+06	6.79761e+06	7.17563e+06	7.16806e+06	6.90489e+06	6.89177e+06	6.69253e+06	6.88648e+06	6.5275e+06	6.56864e+06	6.89764e+06	6.99592e+06	6.85759e+06	7.34898e+06	7.45908e+06	6.85612e+06
p1-0419.0935-004.74-splash10-000i-0090000000-c82a9820c717d42d8fd2	22128.5	20828.3	24456.9	6.25385e+06	7.0031e+06	5.37514e+06	3.98359e+07	2.90843e+07	3.66427e+07	91268	123868	121359	9959.31	9	12749.8	9	9	13792.5
p0-0289.0755-005.13-splash10-0zos-0930000000-23ae5ad62032dc58f082	1.7675e+07	1.79182e+07	1.87312e+07	9.13922e+06	1.06571e+07	9.03829e+06	7.34313e+06	6.55891e+06	9.45365e+06	1.18217e+06	617089	506843	575908	740767	831123	526113	655309	666824
p1-0146.0592-003.58-splash10-004i-5900000000-c2f94f3b97fafa181f11	3.47859e+06	2.14734e+07	2.90715e+06	4.70349e+06	5.15139e+06	6.30106e+06	1.4201e+07	1.37597e+07	1.01063e+07	4.33077e+06	9.1455e+06	5.05197e+06	6.92226e+06	2.54081e+06	7.86331e+06	3.32335e+06	5.14049e+06	3.42629e+06
p1-0146.1680-000.51-splash10-014i-9000000000-d47416580d915cacb29d	1.0554e+07	7.76847e+06	8.80938e+06	6.87516e+06	7.33276e+06	6.51183e+06	3.81535e+06	4.77052e+06	4.63709e+06	1.25429e+07	7.10905e+06	5.69333e+06	3.9964e+06	4.91082e+06	5.5537e+06	4.3623e+06	5.323e+06	3.86645e+06
p1-0118.0860-001.11-splash10-0a4i-9000000000-295ae17283d8aa227e7b	1.05873e+07	9.84436e+06	1.1426e+07	4.63969e+06	6.65696e+06	4.47908e+06	4.64859e+06	5.68921e+06	4.76001e+06	2.28153e+07	1.79607e+07	2.03844e+07	1.47359e+07	4.59115e+06	7.76918e+06	9.11222e+06	6.01075e+06	8.34263e+06
p0-0477.1674-004.39-splash10-02ai-1972800000-a58e42932aba9923f7d4	1.71238e+07	2.35167e+07	1.84612e+07	3.15176e+07	1.66768e+07	3.69803e+07	2.08466e+07	2.37817e+07	1.69963e+07	632572	1.42219e+06	983002	1.0519e+06	144143	953220	536538	415709	323602
p0-0195.0445-000.69-splash10-004i-9000000000-d785c279f9e7763e6d7b	9.83419e+06	1.07419e+07	1.00116e+07	1.67023e+07	1.78797e+07	2.06508e+07	1.54438e+07	1.63351e+07	1.69831e+07	3.84588e+06	4.46465e+06	5.3312e+06	8.98734e+06	7.02367e+06	1.06997e+07	9.44996e+06	8.5739e+06	8.85004e+06
p1-0288.2789-011.24-splash10-000i-5390000000-224f676d7ea56b024c36	2.01674e+06	2.28737e+06	2.10488e+06	3.14571e+06	2.46406e+06	3.28644e+06	2.62853e+06	3.16014e+06	3.02934e+06	2.80949e+06	2.67612e+06	2.70414e+06	2.95953e+06	2.91202e+06	3.16067e+06	2.50236e+06	2.42165e+06	2.4076e+06
p1-0191.0699-004.11-splash10-014i-1900000000-2c6ab2eaf6a86a241bde	2.49288e+07	2.80343e+07	2.39809e+07	1.10898e+07	1.36396e+07	1.082e+07	9.01928e+06	8.29661e+06	8.67234e+06	5.66819e+06	6.94952e+06	8.09511e+06	1.87751e+06	1.24809e+06	2.32428e+06	1.08097e+06	799910	972538
p1-0147.0428-005.77-splash10-00kf-9100000000-e7ba70532ea2cce8b224	2.33826e+07	2.23887e+07	2.51428e+07	9	1.96367e+07	2.4052e+07	2.21643e+07	1.80274e+07	2.07465e+07	3.40077e+06	7.23251e+06	1.70223e+06	702093	717429	749622	451892	425834	449650
p1-0124.0388-002.70-splash10-0059-9100000000-a610245607d79cbb48ff	1.60451e+07	1.67732e+07	1.35983e+07	8.58006e+06	6.94563e+06	8.44656e+06	5.78101e+06	7.14999e+06	7.95213e+06	3.17018e+07	2.92321e+07	2.96033e+07	7.44398e+06	7.88302e+06	8.7342e+06	5.85965e+06	6.10702e+06	5.86822e+06
p0-0191.0350-004.37-splash10-0fba-0900000000-f9c547bd6c56b3053296	1.79936e+06	2.62776e+06	1.77715e+06	1.38161e+06	1.85214e+06	1.51749e+06	1.26363e+06	1.35632e+06	1.32665e+06	3.17328e+07	3.11778e+07	3.26802e+07	2.71825e+07	2.45185e+07	2.9347e+07	2.44629e+07	2.25994e+07	2.06271e+07
p1-0579.1442-004.15-splash10-056r-0492510000-65d1b43b26417ed82cb6	7.41965e+07	6.25046e+07	4.79221e+07	1.28916e+07	1.38822e+07	6.62565e+06	9	9	6.6922e+06	3.79363e+06	1.6528e+06	1.47927e+06	791977	9	1.27028e+06	385157	768065	511221
p1-0298.0930-003.85-splash10-000i-1900000000-b4ca595f2722245b53e8	3.6174e+06	2.164e+06	3.127e+06	3.10532e+06	4.47163e+06	3.52085e+06	1.54307e+06	2.23772e+06	1.9352e+06	1.05547e+07	8.76188e+06	6.36482e+06	4.78117e+07	1.65971e+07	2.60135e+07	1.53912e+07	1.03058e+07	1.68888e+07
p1-0318.2997-011.48-splash10-03e9-9081000000-f5f8b8cc3a4a1d083b98	1.79327e+07	1.53713e+07	1.77536e+07	1.0262e+07	1.05115e+07	1.07682e+07	6.73034e+06	6.65974e+06	6.30042e+06	2.45438e+07	2.3247e+07	2.4589e+07	1.75152e+07	1.52516e+07	1.6815e+07	1.25269e+07	1.29087e+07	1.17438e+07
p1-0365.1038-003.25-splash10-0uxr-0295000000-2fd42cc9663f5527904f	9	9	3.08079e+07	9	9	9	9	9	1.08117e+08	9	9	7.61605e+06	9	9	9	9	9	9
p0-0179.0364-005.18-splash10-000i-2900000000-2ff67f48cbe8dd771112	3.70569e+07	4.28499e+07	3.58166e+07	1.30553e+07	1.13994e+07	1.24292e+07	1.09327e+07	7.94953e+06	1.09903e+07	1.052e+07	8.58508e+06	9.53976e+06	3.31862e+06	2.12794e+06	3.08382e+06	1.51101e+06	2.11289e+06	1.51881e+06
p1-0449.1068-005.13-splash10-0udi-0029000000-4c203f8eba2b2513d838	3.11376e+07	3.08618e+07	2.8709e+07	1.15456e+07	1.36617e+07	1.16902e+07	1.06037e+07	1.0523e+07	1.06269e+07	3.75385e+07	3.91097e+07	4.53379e+07	1.08031e+07	8.52046e+06	1.08133e+07	5.88347e+06	5.31321e+06	6.27243e+06
p1-0205.0959-003.89-splash10-014l-0900000000-d35ebb3dd62e493b7e6c	1.40925e+07	8.46744e+06	1.26967e+07	1.28484e+07	4.09583e+07	1.22178e+07	8.37744e+06	8.40985e+06	7.39582e+06	4.26187e+07	2.2606e+07	3.02687e+07	2.5799e+07	3.3702e+06	1.58569e+07	4.33087e+06	2.3309e+07	1.89446e+06
p1-0130.0867-001.19-splash10-001i-9000000000-a666288471279640e512	5.42072e+07	4.37149e+07	5.97322e+07	1.34186e+07	1.69389e+07	1.4172e+07	1.03348e+07	1.09373e+07	8.80305e+06	7.99506e+07	6.3598e+07	6.22244e+07	2.41958e+07	1.61063e+07	2.16862e+07	1.51883e+07	1.88765e+07	1.36309e+07
p0-0353.0861-004.55-splash10-009f-0900000000-62ba6c1f3bd3489d821a	4.62004e+06	5.09055e+06	5.34131e+06	2.04193e+06	3.32677e+06	2.98681e+06	1.89356e+06	1.54154e+06	1.96624e+06	6.82456e+07	6.07028e+07	5.99627e+07	3.72133e+07	3.05896e+07	4.05632e+07	2.79594e+07	2.47182e+07	2.67674e+07
p0-0577.1312-003.88-splash10-0550-0392520000-a3487eafa5b963e8b640	6.51569e+07	7.59314e+07	9	4.09373e+07	4.77224e+07	4.66383e+07	3.21953e+07	2.92081e+07	3.35631e+07	3.12193e+06	2.23397e+06	1.38507e+06	1.53512e+06	1.68094e+06	2.05657e+06	957965	1.20088e+06	1.14599e+06
p0-0613.1776-009.62-splash10-0002-0902013000-b633cb0564b8e8c9903f	1.35955e+08	1.30908e+08	1.18734e+08	4.56202e+07	4.48941e+07	5.93653e+07	2.81061e+07	2.62209e+07	3.30539e+07	2.41036e+06	3.45703e+06	7.40055e+06	962630	957237	1.60493e+06	451659	583951	546861
p0-0191.0133-000.81-splash10-03xr-9600000000-4cc000faf0e7a195b2ef	1.93795e+08	1.9127e+08	1.85204e+08	6.57116e+07	9.90153e+07	8.94769e+07	6.92794e+07	8.8109e+07	5.51281e+07	8.05735e+07	8.0898e+07	1.00396e+08	1.05044e+07	8.1901e+06	9.98894e+06	5.48228e+06	3.9533e+06	3.56232e+06
p1-0146.0599-002.93-splash10-004i-4900000000-c474f707e5b059f383a2	6.25947e+07	1.29432e+08	5.57633e+07	5.49203e+07	3.50694e+07	7.05146e+07	5.55318e+07	5.62628e+07	4.98319e+07	7.94283e+07	1.08736e+08	1.00712e+08	3.70851e+07	1.73396e+07	7.24348e+07	4.27931e+07	4.61153e+07	2.64321e+07
p0-0447.0938-005.27-splash10-000i-0191000000-237a750fa97b156b0270	7.85977e+07	9.23575e+07	7.31885e+07	1.10242e+08	7.83001e+07	1.19791e+08	8.36769e+07	8.70262e+07	7.88293e+07	1.95069e+07	3.25859e+07	2.37277e+07	1.78074e+07	3.04494e+06	2.02367e+07	9.72378e+06	6.77296e+06	5.85642e+06
p0-0131.0383-000.65-splash10-00di-9100000000-b0508463a6526b16d93d	6.55205e+07	5.88383e+07	6.52491e+07	3.98166e+07	5.68351e+07	3.55997e+07	6.6235e+07	5.88281e+07	4.53585e+07	5.36263e+07	4.9339e+07	3.97196e+07	8.91285e+07	1.1552e+07	1.12083e+08	5.38e+07	7.52531e+07	5.09224e+07
p1-0351.1054-008.28-splash10-0002-0900000000-7a7ed4412787ddd933e7	2.68814e+08	2.63753e+08	2.5711e+08	3.75462e+07	3.74281e+07	4.87223e+07	2.28311e+07	1.93e+07	2.14334e+07	1.20839e+07	1.54699e+07	2.8773e+07	1.86864e+06	1.87296e+06	3.26489e+06	669544	1.01037e+06	979064
p0-0337.0953-004.37-splash10-03xu-0900000000-9289f709a501944c5d5d	1.63269e+07	1.69532e+07	1.53458e+07	4.51688e+06	4.63979e+06	4.82724e+06	2.94249e+06	3.1236e+06	3.12569e+06	1.40195e+08	1.56514e+08	1.49993e+08	6.56436e+07	5.80696e+07	7.02709e+07	5.38347e+07	5.02622e+07	4.95937e+07
p1-0116.0707-000.73-splash10-00di-9000000000-cd6d56c5725592760fe9	2.86857e+08	2.82111e+08	3.01614e+08	7.74689e+07	1.02028e+08	8.49945e+07	1.18161e+08	1.556e+08	8.00417e+07	1.62464e+08	1.46259e+08	1.67345e+08	1.41065e+08	5.73876e+07	1.75375e+08	8.85934e+07	9.05597e+07	8.44538e+07
p1-0139.0386-004.03-splash10-014i-9000000000-c06a17c2fe70abe7f03c	9	1.38019e+06	464678	422908	972165	465434	154176	281434	357467	5.63243e+06	7.98552e+06	8.65408e+06	1.13464e+06	505056	870627	9	290710	416387
p1-0163.0588-000.90-splash10-0670-9000000000-56a3eea117ae08f27fce	469168	638931	509234	9	531319	9	398917	581795	9	9	567880	580192	9	9	142518	147603	207356	176282
p1-0191.0695-005.60-splash10-00ls-1900000000-a0f95bf6e2c25de843f3	117761	151562	114701	97677.1	66834.1	75836.8	68913.6	65367.9	9	1.78956e+06	2.23296e+06	1.81892e+06	387781	370087	408899	244839	238646	287912
p1-0349.2011-010.94-splash10-001j-0962000000-958ddf2d670b89d04740	9	9	9	9	9	9	1360.55	9	9	9	9	1507.99	2514.97	9	9	9	9	9
p1-0365.1043-012.19-splash10-0udi-0492000000-e08a68eb08897d86f02e	9	9	341023	9	9	9	9	841506	9	9	9	9	9	1.09093e+06	1.14131e+06	9	1.06749e+06	1.182e+06
p1-0395.3655-012.11-splash10-0002-1942000000-cbc23e3844b741f143f0	72187.4	115907	9	9	9	9	9	9	9	9	58446.2	9	33723.7	9	9	9	9	9
p0-0565.1225-005.92-splash10-0gb9-0007090000-801c756a0212469d7268	9	9	9	9	9	9	208813	9	9	1158.95	2844.42	907.784	9	9	9	9	9	9
