# Supplementary material for: Transcriptome and metabolome analyses reveal anthocyanins pathways associated with fruit color changes in plum (Prunus salicina Lindl.)
Source: PeerJ. 2022 Dec 13;10:e14413. doi: 10.7717/peerj.14413 (PMC9756864; doi:10.7717/peerj.14413)
Supplement: Supplemental Information 6 [file peerj-10-14413-s006.xlsx]

## Sheet: Table S3
Table S4 Power analysis between different groups
group	Depth	log2FC	FDR	CV	power(n=3)
C1-vs-D1	10	2	0.05	0.138744	0.690891
C2-vs-D2	10	2	0.05	0.0689704	0.74631
C3-vs-D3	10	2	0.05	0.102702	0.723511
