# Supplementary material for: Transcriptome and metabolome analyses reveal anthocyanins pathways associated with fruit color changes in plum (Prunus salicina Lindl.)
Source: PeerJ. 2022 Dec 13;10:e14413. doi: 10.7717/peerj.14413 (PMC9756864; doi:10.7717/peerj.14413)
Supplement: Supplemental Information 7 — The first three sheets in the table represent the DEGs of each comparision It contains the information of gene expression level and KEGG & GO annotation The last sheet shows the results of Veen analysis [file peerj-10-14413-s007.xlsx]

## Sheet: Legend
Table S5 Information of all differentially expressed genes (DEGs) and the Venn analysis results
The first three sheets in the table represent the DEGs of each comparision
It contains the information of gene expression level and KEGG & GO annotation
The last sheet shows the results of Veen analysis

## Sheet: C1-vs-D1.filter.annot
id	C1-1_count	C1-2_count	C1-3_count	D1-1_count	D1-2_count	D1-3_count	C1-1_rpkm	C1-2_rpkm	C1-3_rpkm	D1-1_rpkm	D1-2_rpkm	D1-3_rpkm	C1_mean	D1_mean	log2(fc)	PValue	FDR	Symbol	Description	KEGG_A_class	KEGG_B_class	Pathway	K_ID	GO Component	GO Function	GO Process
Unigene0012487	31523	29933	30550	16	23	12	294.45	252.7	335.4	0.13	0.2	0.09	294.183	0.14	-11.0371	0	0	SEOB	PREDICTED: protein SIEVE ELEMENT OCCLUSION B-like [Prunus mume]	-	-	-	-	-	-	-
Unigene0025582	40075	48276	37934	534	425	586	286.9	312.36	319.19	3.25	2.84	3.47	306.15	3.18667	-6.58605	0	0	RNP1	26S proteasome non-ATPase regulatory subunit 10 [Morus notabilis]	-	-	-	-	-	GO:0005488//binding	-
Unigene0030599	22001	30833	20770	6	10	12	331.64	420.06	367.99	0.08	0.14	0.15	373.23	0.123333	-11.5633	3.78973e-297	3.94398e-293	ORF5	-	-	-	-	-	-	-	-
Unigene0032156	131	134	134	10041	7395	8813	1.71	1.58	2.05	111.26	90.1	95.13	1.78	98.83	5.795	4.26374e-277	3.32795e-273	GT5	PREDICTED: LOW QUALITY PROTEIN: anthocyanidin 3-O-glucosyltransferase 5 [Prunus mume]	Metabolism	Biosynthesis of other secondary metabolites	ko00940//Phenylpropanoid biosynthesis	K12356	-	-	-
Unigene0030233	38	44	27	4760	4515	4361	0.44	0.46	0.37	46.72	48.72	41.69	0.423333	45.71	6.75457	7.58635e-235	4.73707e-231	UGT85A24	PREDICTED: 7-deoxyloganetin glucosyltransferase-like [Prunus mume]	Metabolism;Metabolism	Global and overview maps;Global and overview maps	ko01100//Metabolic pathways;ko01110//Biosynthesis of secondary metabolites	K21374;K21374	-	-	-
Unigene0029891	15433	19304	12802	827	826	1066	188.16	212.71	183.45	8.57	9.42	10.77	194.773	9.58667	-4.34462	6.254e-220	3.25427e-216	AMAT	PREDICTED: methanol O-anthraniloyltransferase-like [Prunus mume]	-	-	-	-	-	-	-
Unigene0005253	7004	6101	5873	8	23	18	198.6	156.35	195.73	0.19	0.61	0.42	183.56	0.406667	-8.81819	4.96595e-203	2.21488e-199	--	PREDICTED: late embryogenesis abundant protein 1-like [Prunus mume]	-	-	-	-	-	-	-
Unigene0032046	3823	3746	3294	45	66	72	81.47	72.15	82.51	0.82	1.32	1.27	78.71	1.13667	-6.11367	2.65897e-195	1.0377e-191	DEFA	PREDICTED: floral homeotic protein DEFICIENS-like isoform X2 [Prunus mume]	-	-	-	-	-	-	GO:0010467//gene expression;GO:0034645//cellular macromolecule biosynthetic process
Unigene0031957	2091	2156	1639	111	102	126	28.87	26.91	26.6	1.3	1.32	1.44	27.46	1.35333	-4.34274	1.92323e-177	6.67169e-174	--	PREDICTED: uncharacterized protein LOC103342605 [Prunus mume]	-	-	-	-	-	-	-
Unigene0026445	485	568	400	24028	20009	16728	6.98	7.39	6.77	294.22	269.39	199.53	7.04667	254.38	5.1739	7.77493e-175	2.42741e-171	HST	PREDICTED: shikimate O-hydroxycinnamoyltransferase-like [Prunus mume]	Metabolism;Metabolism;Metabolism;Metabolism;Metabolism	Global and overview maps;Global and overview maps;Biosynthesis of other secondary metabolites;Biosynthesis of other secondary metabolites;Biosynthesis of other secondary metabolites	ko01100//Metabolic pathways;ko01110//Biosynthesis of secondary metabolites;ko00940//Phenylpropanoid biosynthesis;ko00941//Flavonoid biosynthesis;ko00945//Stilbenoid, diarylheptanoid and gingerol biosynthesis	K13065;K13065;K13065;K13065;K13065	-	GO:0016746//transferase activity, transferring acyl groups	-
Unigene0003860	167	270	156	12991	10935	9728	2.47	3.61	2.71	163.21	151.06	119.06	2.93	144.443	5.62346	4.49126e-169	1.27474e-165	OMR1	PREDICTED: threonine dehydratase biosynthetic, chloroplastic-like [Prunus mume]	Metabolism;Metabolism;Metabolism;Metabolism;Metabolism;Metabolism	Global and overview maps;Global and overview maps;Global and overview maps;Global and overview maps;Amino acid metabolism;Amino acid metabolism	ko01100//Metabolic pathways;ko01110//Biosynthesis of secondary metabolites;ko01200//Carbon metabolism;ko01230//Biosynthesis of amino acids;ko00260//Glycine, serine and threonine metabolism;ko00290//Valine, leucine and isoleucine biosynthesis	K01754;K01754;K01754;K01754;K01754;K01754	GO:0009536//plastid	GO:0016841//ammonia-lyase activity;GO:0043168//anion binding	GO:0006006//glucose metabolic process;GO:0006549//isoleucine metabolic process;GO:0006996//organelle organization;GO:0008652//cellular amino acid biosynthetic process;GO:0051603//proteolysis involved in cellular protein catabolic process
Unigene0030719	1320	1535	1139	56	45	51	9.82	10.32	9.96	0.35	0.31	0.31	10.0333	0.323333	-4.95563	1.82484e-158	4.74777e-155	ufaA1	cyclopropane-fatty-acyl-phospholipid synthase family protein [Populus trichocarpa]	-	-	-	-	-	-	-
Unigene0004156	7	28	6	5291	4526	6071	0.08	0.3	0.08	52.8	49.66	59.02	0.153333	53.8267	8.45551	1.16344e-157	2.79413e-154	ATG8C	PREDICTED: autophagy-related protein 8C-like [Prunus mume]	Cellular Processes	Transport and catabolism	ko04136//Autophagy - other eukaryotes	K08341	-	-	-
Unigene0025629	381	477	393	6558	4866	6553	3.06	3.47	3.71	44.83	36.58	43.64	3.41333	41.6833	3.61022	1.78069e-152	3.97106e-149	--	PREDICTED: sentrin-specific protease 2-like [Prunus mume]	-	-	-	-	-	-	-
Unigene0000372	12921	13252	12560	1148	1053	1424	208.62	193.38	238.35	15.76	15.9	19.04	213.45	16.9	-3.6588	1.79536e-143	3.73685e-140	PKS5	chalcone synthase [Prunus persica]	Metabolism;Metabolism;Metabolism;Organismal Systems	Global and overview maps;Global and overview maps;Biosynthesis of other secondary metabolites;Environmental adaptation	ko01100//Metabolic pathways;ko01110//Biosynthesis of secondary metabolites;ko00941//Flavonoid biosynthesis;ko04712//Circadian rhythm - plant	K00660;K00660;K00660;K00660	-	-	-
Unigene0005707	145	140	93	2505	2218	2515	2.4	2.1	1.81	35.27	34.34	34.5	2.10333	34.7033	4.04432	1.13658e-142	2.21782e-139	HST	PREDICTED: shikimate O-hydroxycinnamoyltransferase-like [Prunus mume]	Metabolism;Metabolism;Metabolism;Metabolism;Metabolism	Global and overview maps;Global and overview maps;Biosynthesis of other secondary metabolites;Biosynthesis of other secondary metabolites;Biosynthesis of other secondary metabolites	ko01100//Metabolic pathways;ko01110//Biosynthesis of secondary metabolites;ko00940//Phenylpropanoid biosynthesis;ko00941//Flavonoid biosynthesis;ko00945//Stilbenoid, diarylheptanoid and gingerol biosynthesis	K13065;K13065;K13065;K13065;K13065	-	-	-
Unigene0017700	2310	1955	1776	25	35	24	47.49	36.32	42.91	0.44	0.67	0.41	42.24	0.506667	-6.38143	4.85937e-140	8.92438e-137	--	PREDICTED: GATA zinc finger domain-containing protein 14-like [Pyrus x bretschneideri]	-	-	-	-	-	-	-
Unigene0025422	332	470	240	11407	7662	10858	2.7	3.46	2.3	79	58.34	73.25	2.82	70.1967	4.63764	3.65816e-138	6.34508e-135	WNK5	PREDICTED: probable serine/threonine-protein kinase WNK5 [Prunus mume]	-	-	-	-	-	GO:0004672//protein kinase activity;GO:0019901//protein kinase binding;GO:0032550//purine ribonucleoside binding	GO:0006464//cellular protein modification process;GO:0006796//phosphate-containing compound metabolic process;GO:0009648//photoperiodism
Unigene0028988	2554	3222	2433	133	158	188	26.33	30.02	29.48	1.17	1.52	1.61	28.61	1.43333	-4.31907	7.70698e-137	1.26642e-133	SALAT	PREDICTED: BAHD acyltransferase At5g47980-like [Prunus mume]	Metabolism;Metabolism;Metabolism;Metabolism;Metabolism	Global and overview maps;Global and overview maps;Biosynthesis of other secondary metabolites;Biosynthesis of other secondary metabolites;Biosynthesis of other secondary metabolites	ko01100//Metabolic pathways;ko01110//Biosynthesis of secondary metabolites;ko00940//Phenylpropanoid biosynthesis;ko00941//Flavonoid biosynthesis;ko00945//Stilbenoid, diarylheptanoid and gingerol biosynthesis	K13065;K13065;K13065;K13065;K13065	-	-	-
Unigene0031866	16065	26785	16664	554	710	649	112.71	169.84	137.41	3.31	4.66	3.77	139.987	3.91333	-5.16075	5.9488e-132	9.28638e-129	LOX3.1	PREDICTED: linoleate 13S-lipoxygenase 3-1, chloroplastic-like [Prunus mume]	Metabolism;Metabolism;Metabolism;Metabolism	Global and overview maps;Global and overview maps;Lipid metabolism;Lipid metabolism	ko01100//Metabolic pathways;ko01110//Biosynthesis of secondary metabolites;ko00592//alpha-Linolenic acid metabolism;ko00591//Linoleic acid metabolism	K00454;K00454;K00454;K00454	-	-	-
Unigene0000087	1517	2025	1469	84	81	114	9.68	11.68	11.01	0.46	0.48	0.6	10.79	0.513333	-4.39366	1.03646e-128	1.54092e-125	LTPG1	PREDICTED: UPF0481 protein At3g47200-like [Prunus mume]	-	-	-	-	-	-	-
Unigene0002537	2483	3535	2298	62	23	52	6.34	8.16	6.9	0.13	0.05	0.11	7.13333	0.0966667	-6.20541	1.29154e-127	1.83287e-124	At4g27190	PREDICTED: LOW QUALITY PROTEIN: probable disease resistance protein At4g27220 [Prunus mume]	-	-	-	-	-	-	-
Unigene0030551	6389	7026	5682	1296	1184	1321	104.71	104.08	109.46	18.06	18.14	17.93	106.083	18.0433	-2.55566	4.33361e-123	5.88259e-120	--	hypothetical protein PRUPE_ppa012457mg [Prunus persica]	-	-	-	-	-	-	-
Unigene0000366	30550	36821	26205	1832	1375	2595	171.62	186.95	173.02	8.75	7.22	12.08	177.197	9.35	-4.24424	3.17503e-119	4.13032e-116	N	PREDICTED: TMV resistance protein N-like [Prunus mume]	-	-	-	-	-	-	-
Unigene0033302	4	6	7	2792	2661	3144	0.08	0.11	0.17	48.14	50.45	52.81	0.12	50.4667	8.71615	5.73796e-119	7.16579e-116	--	hypothetical protein PRUPE_4G109700 [Prunus persica]	-	-	-	-	-	-	-
Unigene0026315	338	473	282	7953	10504	10513	10.51	13.29	10.31	210.26	305.34	270.74	11.37	262.113	4.52689	4.67596e-116	5.61493e-113	--	PREDICTED: BURP domain protein RD22-like [Prunus mume]	-	-	-	-	-	-	-
Unigene0001627	4390	4753	3987	570	386	587	50.77	49.68	54.2	5.61	4.17	5.62	51.55	5.13333	-3.328	2.95077e-114	3.41207e-111	4CL1	PREDICTED: 4-coumarate--CoA ligase 2-like [Prunus mume]	Metabolism;Metabolism;Metabolism;Metabolism;Metabolism	Global and overview maps;Global and overview maps;Biosynthesis of other secondary metabolites;Amino acid metabolism;Metabolism of cofactors and vitamins	ko01100//Metabolic pathways;ko01110//Biosynthesis of secondary metabolites;ko00940//Phenylpropanoid biosynthesis;ko00360//Phenylalanine metabolism;ko00130//Ubiquinone and other terpenoid-quinone biosynthesis	K01904;K01904;K01904;K01904;K01904	-	GO:0016703//oxidoreductase activity, acting on single donors with incorporation of molecular oxygen, incorporation of one atom of oxygen (internal monooxygenases or internal mixed function oxidases)	GO:0044710//single-organism metabolic process
Unigene0010499	4886	3340	3372	2	10	5	249.5	154.15	202.38	0.09	0.48	0.21	202.01	0.26	-9.6017	2.45545e-113	2.73792e-110	--	PREDICTED: heterogeneous nuclear ribonucleoproteins A1 homolog [Prunus mume]	-	-	-	-	-	-	-
Unigene0013281	5180	5161	3841	30127	27140	31451	52.06	46.87	45.37	257.44	255	261.8	48.1	258.08	2.42371	2.22259e-109	2.39281e-106	SCPL18	PREDICTED: serine carboxypeptidase-like 17 isoform X1 [Prunus mume]	-	-	-	-	-	-	-
Unigene0025956	1165	1487	1028	52	59	81	8.56	9.88	8.88	0.32	0.41	0.49	9.10667	0.406667	-4.485	2.20003e-107	2.28958e-104	--	hypothetical protein PRUPE_7G070100 [Prunus persica]	-	-	-	-	-	-	-
Unigene0011990	21	15	22	1329	1144	1214	0.19	0.12	0.23	10.19	9.65	9.07	0.18	9.63667	5.74247	3.50258e-107	3.52755e-104	ASAT1	PREDICTED: acyl-CoA--sterol O-acyltransferase 1-like [Prunus mume]	-	-	-	-	-	-	-
Unigene0000100	380	462	302	5078	3440	4702	4.55	5	4.25	51.74	38.54	46.67	4.6	45.65	3.31091	1.6339e-106	1.59412e-103	--	PREDICTED: uncharacterized transmembrane protein DDB_G0289901-like [Prunus mume]	-	-	-	-	-	-	-
Unigene0029798	253	325	225	3848	2634	3409	4	4.65	4.18	51.78	38.97	44.68	4.27667	45.1433	3.39995	2.97069e-106	2.81055e-103	--	CHD3-type chromatin-remodeling factor PICKLE [Morus notabilis]	-	-	-	-	-	-	-
Unigene0000396	943	1145	852	8220	6891	10194	6.24	6.84	6.62	46.22	42.61	55.84	6.56667	48.2233	2.8765	1.57598e-105	1.44716e-102	At1g53440	PREDICTED: probable leucine-rich repeat receptor-like serine/threonine-protein kinase At3g14840 [Prunus mume]	-	-	-	-	-	GO:0016301//kinase activity	GO:0006796//phosphate-containing compound metabolic process
Unigene0034951	1527	1755	1347	52	77	88	34.65	35.99	35.92	1	1.63	1.65	35.52	1.42667	-4.63791	8.92511e-104	7.96145e-101	--	hypothetical protein PRUPE_ppa008127mg [Prunus persica]	-	-	-	-	-	-	-
Unigene0008721	6	14	2	2077	1521	2304	0.06	0.13	0.02	17.76	14.3	19.19	0.07	17.0833	7.93102	1.32622e-103	1.15016e-100	CNGC1	PREDICTED: cyclic nucleotide-gated ion channel 1-like [Prunus mume]	Organismal Systems	Environmental adaptation	ko04626//Plant-pathogen interaction	K05391	-	-	-
Unigene0000007	980	1309	1012	66	43	52	5.82	7.03	7.06	0.33	0.24	0.26	6.63667	0.276667	-4.58424	3.30066e-103	2.78513e-100	RGA2	PREDICTED: disease resistance protein RGA2-like [Pyrus x bretschneideri]	-	-	-	-	-	-	-
Unigene0006199	99	161	113	3143	2091	3259	0.84	1.24	1.13	22.71	16.61	22.94	1.07	20.7533	4.27766	9.82976e-102	8.07618e-99	RHD3	PREDICTED: protein ROOT HAIR DEFECTIVE 3 homolog 1-like [Prunus mume]	-	-	-	-	GO:0043231//intracellular membrane-bounded organelle;GO:0044425//membrane part	GO:0016787//hydrolase activity	-
Unigene0026802	3892	4125	3071	181	259	246	51.05	48.9	47.35	2.02	3.18	2.67	49.1	2.62333	-4.22625	1.08725e-101	8.70389e-99	DJ1D	PREDICTED: protein DJ-1 homolog D-like [Prunus mume]	Metabolism	Carbohydrate metabolism	ko00620//Pyruvate metabolism	K18881	-	-	-
Unigene0036871	8891	10232	7860	1921	1382	1943	457.94	476.3	475.82	84.13	66.55	82.89	470.02	77.8567	-2.59383	1.89726e-100	1.48086e-97	--	PREDICTED: leucine-rich repeat extensin-like protein 3 [Prunus mume]	-	-	-	-	-	-	-
Unigene0021713	1856	1971	1501	143	74	117	9.38	9	8.92	0.61	0.35	0.49	9.1	0.483333	-4.23478	2.80083e-98	2.13279e-95	ABCC8	PREDICTED: ABC transporter C family member 8 [Prunus mume]	-	-	-	-	GO:0031224//intrinsic component of membrane	GO:0016491//oxidoreductase activity;GO:0032550//purine ribonucleoside binding;GO:0042626//ATPase activity, coupled to transmembrane movement of substances	GO:0008152//metabolic process;GO:0015893//drug transport;GO:0044763//single-organism cellular process
Unigene0029217	7961	8420	6717	855	868	730	38.7	37	38.38	3.53	3.95	2.94	38.0267	3.47333	-3.45262	5.78162e-98	4.29781e-95	PR	PREDICTED: perakine reductase-like [Prunus mume]	-	-	-	-	-	-	-
Unigene0029676	2059	3207	2328	17	37	15	37.97	53.46	50.46	0.27	0.64	0.23	47.2967	0.38	-6.9596	1.29784e-97	9.42322e-95	ORF1	RNA replication protein [Anthurium amnicola]	-	-	-	-	-	-	-
Unigene0006595	1040	1189	820	11	5	7	32.21	33.28	29.85	0.29	0.14	0.18	31.78	0.203333	-7.28813	9.71848e-97	6.89592e-94	--	hypothetical protein PRUPE_5G064400 [Prunus persica]	-	-	-	-	-	-	-
Unigene0033981	0	8	6	2624	2893	2687	0	0.11	0.11	33.65	40.8	33.57	0.0733333	36.0067	8.93958	9.03214e-96	6.2665e-93	--	PREDICTED: L10-interacting MYB domain-containing protein-like [Prunus mume]	-	-	-	-	-	-	-
Unigene0036255	286	357	254	2525	1956	2516	2.88	3.24	3	21.59	18.39	20.95	3.04	20.31	2.74005	4.58134e-95	3.10944e-92	--	PREDICTED: disease resistance RPP13-like protein 4 isoform X3 [Prunus mume]	-	-	-	-	-	-	-
Unigene0030655	1062	1159	944	5	11	5	13.79	13.61	14.41	0.06	0.13	0.05	13.9367	0.08	-7.44467	2.41724e-94	1.60572e-91	At5g66910	PREDICTED: probable disease resistance protein At5g66900 [Malus domestica]	-	-	-	-	-	-	-
Unigene0020244	1698	1748	1351	97	53	114	9.8	9.12	9.16	0.48	0.29	0.54	9.36	0.436667	-4.4219	6.48961e-93	4.22108e-90	RGA2	hypothetical protein PRUPE_1G528800 [Prunus persica]	-	-	-	-	-	-	-
Unigene0017469	2889	2968	2685	445	307	412	36.18	33.6	39.53	4.74	3.59	4.27	36.4367	4.2	-3.11693	4.24315e-92	2.70358e-89	EMB3004	PREDICTED: bifunctional 3-dehydroquinate dehydratase/shikimate dehydrogenase, chloroplastic-like isoform X1 [Prunus mume]	Metabolism;Metabolism;Metabolism;Metabolism	Global and overview maps;Global and overview maps;Global and overview maps;Amino acid metabolism	ko01100//Metabolic pathways;ko01110//Biosynthesis of secondary metabolites;ko01230//Biosynthesis of amino acids;ko00400//Phenylalanine, tyrosine and tryptophan biosynthesis	K13832;K13832;K13832;K13832	-	-	-
Unigene0009445	8529	10285	7794	67	148	64	577.82	629.74	620.61	3.86	9.37	3.59	609.39	5.60667	-6.76408	1.87691e-91	1.17198e-88	--	-	-	-	-	-	-	-	-
Unigene0023283	26669	30515	22348	2927	2069	3752	194.19	200.82	191.26	18.12	14.09	22.63	195.423	18.28	-3.41826	4.09896e-91	2.50929e-88	LOX2.1	PREDICTED: linoleate 13S-lipoxygenase 2-1, chloroplastic-like [Prunus mume]	Metabolism;Metabolism;Metabolism;Metabolism	Global and overview maps;Global and overview maps;Lipid metabolism;Lipid metabolism	ko01100//Metabolic pathways;ko01110//Biosynthesis of secondary metabolites;ko00592//alpha-Linolenic acid metabolism;ko00591//Linoleic acid metabolism	K00454;K00454;K00454;K00454	-	-	-
Unigene0028433	800	915	696	81	73	81	6.13	6.34	6.27	0.53	0.52	0.51	6.24667	0.52	-3.5865	2.72532e-90	1.63629e-87	N	PREDICTED: TMV resistance protein N-like isoform X1 [Prunus mume]	-	-	-	-	-	-	-
Unigene0025583	356	420	351	14422	23474	14157	10.59	11.29	12.27	364.64	652.58	348.68	11.3833	455.3	5.32182	9.01181e-90	5.30864e-87	--	-	-	-	-	-	-	-	-
Unigene0025730	8	2	4	2216	2146	1973	0.14	0.03	0.08	33.43	35.6	29	0.0833333	32.6767	8.61515	1.22071e-89	7.05776e-87	--	PREDICTED: uncharacterized protein LOC103926544 [Pyrus x bretschneideri]	-	-	-	-	-	-	-
Unigene0032839	1388	1292	1222	130	93	135	25.76	21.67	26.65	2.05	1.61	2.08	24.6933	1.91333	-3.68996	2.35813e-89	1.3386e-86	10HGO	PREDICTED: 8-hydroxygeraniol dehydrogenase-like isoform X1 [Prunus mume]	Metabolism;Metabolism;Metabolism	Global and overview maps;Global and overview maps;Biosynthesis of other secondary metabolites	ko01100//Metabolic pathways;ko01110//Biosynthesis of secondary metabolites;ko00940//Phenylpropanoid biosynthesis	K00083;K00083;K00083	-	GO:0003824//catalytic activity;GO:0043169//cation binding	GO:0044710//single-organism metabolic process
Unigene0031094	2959	3532	2558	508	487	468	36.24	39.1	36.82	5.29	5.58	4.75	37.3867	5.20667	-2.84409	4.25587e-89	2.37273e-86	RCA1	PREDICTED: ribulose bisphosphate carboxylase/oxygenase activase, chloroplastic-like [Prunus mume]	-	-	-	-	-	-	-
Unigene0036676	811	1000	747	13	24	30	4.15	4.63	4.49	0.06	0.11	0.13	4.42333	0.1	-5.46706	6.18714e-89	3.38892e-86	At5g63020	PREDICTED: probable disease resistance protein At5g63020 [Prunus mume]	Organismal Systems	Environmental adaptation	ko04626//Plant-pathogen interaction	K13459	-	-	-
Unigene0012480	5925	7521	5667	332	355	593	77.13	88.48	86.7	3.67	4.32	6.39	84.1033	4.79333	-4.13306	5.51479e-88	2.96857e-85	TPS13	terpene synthase [Prunus cerasoides var. campanulata] [Prunus cerasoides]	Metabolism;Metabolism	Global and overview maps;Metabolism of terpenoids and polyketides	ko01100//Metabolic pathways;ko00909//Sesquiterpenoid and triterpenoid biosynthesis	K14175;K14175	GO:0009536//plastid	GO:0016838//carbon-oxygen lyase activity, acting on phosphates;GO:0046872//metal ion binding	GO:0006721//terpenoid metabolic process
Unigene0030508	4998	5609	4148	1427	1277	1490	46.2	46.86	45.06	11.22	11.04	11.41	46.04	11.2233	-2.03639	1.05665e-87	5.59148e-85	--	Tetratricopeptide repeat-like superfamily protein [Theobroma cacao]	-	-	-	-	-	-	-
Unigene0034717	0	6	6	2128	2088	2185	0	0.07	0.09	22.86	24.66	22.86	0.0533333	23.46	8.78095	1.14134e-86	5.93895e-84	--	PREDICTED: nucleolin-like isoform X3 [Prunus mume]	-	-	-	-	-	-	-
Unigene0026625	587	660	528	24	21	30	8.88	9.02	9.38	0.31	0.3	0.38	9.09333	0.33	-4.78427	3.74705e-85	1.91781e-82	UGT85K5	PREDICTED: 7-deoxyloganetin glucosyltransferase-like [Prunus mume]	Metabolism;Metabolism	Global and overview maps;Global and overview maps	ko01100//Metabolic pathways;ko01110//Biosynthesis of secondary metabolites	K21374;K21374	-	GO:0016757//transferase activity, transferring glycosyl groups	-
Unigene0034289	4864	7625	5202	45	118	81	68.11	96.5	85.62	0.54	1.54	0.94	83.41	1.00667	-6.37256	8.85996e-85	4.46156e-82	UGT94E5	PREDICTED: beta-D-glucosyl crocetin beta-1,6-glucosyltransferase-like [Prunus mume]	Metabolism	Global and overview maps	ko01110//Biosynthesis of secondary metabolites	K21354	-	-	-
Unigene0000355	105	99	96	2034	1823	1610	1.51	1.29	1.62	24.89	24.53	19.19	1.47333	22.87	3.9563	1.18119e-84	5.85365e-82	--	PREDICTED: uncharacterized transmembrane protein DDB_G0289901-like [Prunus mume]	-	-	-	-	-	-	-
Unigene0005760	960	1197	700	9	12	4	4.52	5.09	3.87	0.04	0.05	0.02	4.49333	0.0366667	-6.93717	5.87501e-84	2.866e-81	TY3B-G	PREDICTED: transposon Ty3-I Gag-Pol polyprotein isoform X1 [Daucus carota subsp. sativus] [Daucus carota]	-	-	-	-	-	-	-
Unigene0028255	6347	6614	5142	1648	1304	1515	78.5	73.94	74.75	17.33	15.08	15.52	75.73	15.9767	-2.2449	2.15137e-83	1.03335e-80	AAO	PREDICTED: L-ascorbate oxidase-like [Prunus mume]	Metabolism;Metabolism	Global and overview maps;Carbohydrate metabolism	ko01100//Metabolic pathways;ko00053//Ascorbate and aldarate metabolism	K00423;K00423	-	GO:0003824//catalytic activity;GO:0043169//cation binding	GO:0044710//single-organism metabolic process
Unigene0018178	1108	1875	1069	23115	25807	21961	25.8	39.46	29.26	457.73	561.9	423.62	31.5067	481.083	3.93256	4.78487e-82	2.26346e-79	--	hypothetical protein PRUPE_3G169800 [Prunus persica]	-	-	-	-	-	-	-
Unigene0022255	8	3	1	1791	2072	2201	0.23	0.08	0.03	43.49	55.33	52.07	0.113333	50.2967	8.79375	6.59366e-81	3.07255e-78	--	LOW QUALITY PROTEIN: hypothetical protein PRUPE_1G062100 [Prunus persica]	-	-	-	-	-	-	-
Unigene0029081	683	912	593	10	6	18	2.3	2.78	2.35	0.03	0.02	0.05	2.47667	0.0333333	-6.21529	1.42257e-80	6.53149e-78	CNGC1	PREDICTED: wall-associated receptor kinase 2-like [Prunus mume]	Organismal Systems	Environmental adaptation	ko04626//Plant-pathogen interaction	K05391	-	-	-
Unigene0032531	343	391	342	2471	2335	2657	5.29	5.45	6.2	32.43	33.7	33.97	5.64667	33.3667	2.56294	1.84285e-80	8.33851e-78	FAHD1	PREDICTED: acylpyruvase FAHD1, mitochondrial [Prunus mume]	Metabolism;Metabolism	Global and overview maps;Amino acid metabolism	ko01100//Metabolic pathways;ko00350//Tyrosine metabolism	K01557;K01557	-	GO:0016831//carboxy-lyase activity	-
Unigene0031436	2	7	5	1901	1292	2386	0.02	0.07	0.07	18.03	13.47	22.04	0.0533333	17.8467	8.3864	7.43602e-80	3.31657e-77	--	-	-	-	-	-	-	-	-
Unigene0029695	696	988	663	8	5	8	4.92	6.31	5.5	0.05	0.03	0.05	5.57667	0.0433333	-7.00778	1.34055e-78	5.89483e-76	--	PREDICTED: uncharacterized protein LOC107881929 [Prunus mume]	-	-	-	-	-	-	-
Unigene0034209	6884	6979	5697	30	96	40	470.38	430.99	457.53	1.74	6.13	2.26	452.967	3.37667	-7.06766	1.42724e-77	6.18885e-75	--	-	-	-	-	-	-	-	-
Unigene0000245	599	715	464	30	30	28	8.06	8.7	7.34	0.34	0.38	0.31	8.03333	0.343333	-4.54832	4.47521e-77	1.91398e-74	RPM1	PREDICTED: disease resistance protein RPM1-like [Prunus mume]	Organismal Systems	Environmental adaptation	ko04626//Plant-pathogen interaction	K13457	-	-	-
Unigene0028428	2246	2410	2141	0	4	4	23.51	22.8	26.34	0	0.04	0.03	24.2167	0.0233333	-10.0194	6.1538e-77	2.59632e-74	At2g25737	PREDICTED: uncharacterized protein LOC103327946 [Prunus mume]	-	-	-	-	-	-	-
Unigene0029237	259	371	249	4919	6385	4889	15.52	20.09	17.54	250.62	357.68	242.64	17.7167	283.647	4.00092	1.79086e-76	7.45497e-74	--	Os04g0530200, partial [Oryza sativa Japonica Group]	-	-	-	-	-	-	-
Unigene0008966	2	10	4	1789	2097	1499	0.06	0.27	0.14	45.8	59.03	37.39	0.156667	47.4067	8.24125	2.84139e-76	1.16725e-73	PRUA1	PREDICTED: major allergen Pru ar 1-like [Prunus mume]	-	-	-	-	-	-	GO:0050896//response to stimulus
Unigene0028727	324	345	249	2139	1653	2140	3.87	3.72	3.49	21.71	18.45	21.16	3.69333	20.44	2.4684	4.50468e-76	1.8265e-73	--	uncharacterized LOC8273037 [Ricinus communis]	-	-	-	-	-	GO:0003824//catalytic activity	GO:0044238//primary metabolic process
Unigene0029906	655	848	570	6	13	6	8.57	10.03	8.77	0.07	0.16	0.07	9.12333	0.1	-6.51149	1.0345e-74	4.14077e-72	--	PREDICTED: kinesin-related protein 4 [Prunus mume]	-	-	-	-	-	-	-
Unigene0000748	1143	1476	1038	4	6	1	7.28	8.5	7.77	0.02	0.04	0.01	7.85	0.0233333	-8.39416	1.86752e-74	7.38047e-72	--	PREDICTED: uncharacterized protein LOC108866272 [Pyrus x bretschneideri]	-	-	-	-	-	-	-
Unigene0028521	877	670	726	9	10	9	9.22	6.36	8.97	0.08	0.1	0.08	8.18333	0.0866667	-6.56107	2.77548e-74	1.08317e-71	DRP4C	PREDICTED: dynamin-related protein 4C-like [Prunus mume]	-	-	-	-	-	GO:0017111//nucleoside-triphosphatase activity;GO:0032550//purine ribonucleoside binding	-
Unigene0028875	8	17	20	1253	1176	2193	0.09	0.17	0.26	11.81	12.18	20.13	0.173333	14.7067	6.40678	4.29026e-74	1.65366e-71	TPS9	PREDICTED: probable terpene synthase 9 [Prunus mume]	Metabolism;Metabolism;Metabolism	Global and overview maps;Global and overview maps;Metabolism of terpenoids and polyketides	ko01100//Metabolic pathways;ko01110//Biosynthesis of secondary metabolites;ko00902//Monoterpenoid biosynthesis	K07385;K07385;K07385	-	-	-
Unigene0015381	680	977	635	62	56	56	13.75	17.86	15.1	1.07	1.06	0.94	15.57	1.02333	-3.92742	8.04919e-73	3.06468e-70	At4g19520	PREDICTED: disease resistance protein TAO1-like isoform X2 [Prunus mume]	-	-	-	-	-	-	-
Unigene0010092	540	716	486	3299	2839	3410	5.51	6.6	5.83	28.62	27.08	28.82	5.98	28.1733	2.23611	2.08541e-72	7.84441e-70	BGLU45	PREDICTED: LOW QUALITY PROTEIN: beta-glucosidase 45-like [Prunus mume]	Metabolism;Metabolism;Metabolism;Metabolism;Metabolism	Global and overview maps;Global and overview maps;Biosynthesis of other secondary metabolites;Carbohydrate metabolism;Metabolism of other amino acids	ko01100//Metabolic pathways;ko01110//Biosynthesis of secondary metabolites;ko00940//Phenylpropanoid biosynthesis;ko00500//Starch and sucrose metabolism;ko00460//Cyanoamino acid metabolism	K05350;K05350;K05350;K05350;K05350	-	-	-
Unigene0015136	2242	2451	2145	281	189	344	46.01	45.46	51.74	4.9	3.63	5.85	47.7367	4.79333	-3.316	1.80395e-71	6.70489e-69	MYB3	PREDICTED: myb-related protein 308-like [Prunus mume]	Organismal Systems	Environmental adaptation	ko04626//Plant-pathogen interaction	K09422	-	-	-
Unigene0004470	48	63	44	725	738	855	0.48	0.57	0.52	6.19	6.93	7.11	0.523333	6.74333	3.68766	1.73956e-70	6.38951e-68	--	PREDICTED: protein ACCELERATED CELL DEATH 6-like [Prunus mume]	-	-	-	-	-	-	-
Unigene0026704	90	61	78	1606	1451	1428	1.27	0.78	1.29	19.27	19.14	16.69	1.11333	18.3667	4.04413	5.80739e-70	2.10829e-67	PGIP	polygalacturonase-inhibiting protein [Prunus americana]	-	-	-	-	-	-	-
Unigene0034274	2403	2935	2174	720	583	700	27.89	30.78	29.65	7.1	6.33	6.73	29.44	6.72	-2.13124	1.99025e-69	7.14226e-67	PPT1	PREDICTED: 4-hydroxybenzoate polyprenyltransferase, mitochondrial-like [Prunus mume]	Metabolism;Metabolism;Metabolism	Global and overview maps;Global and overview maps;Metabolism of cofactors and vitamins	ko01100//Metabolic pathways;ko01110//Biosynthesis of secondary metabolites;ko00130//Ubiquinone and other terpenoid-quinone biosynthesis	K06125;K06125;K06125	-	-	-
Unigene0031701	985	1561	980	6	5	24	9.28	13.29	10.85	0.05	0.04	0.19	11.14	0.0933333	-6.89914	4.64001e-69	1.6462e-66	--	-	-	-	-	-	-	-	-
Unigene0019549	4611	6634	4294	270	204	462	191.57	249.1	209.68	9.54	7.92	15.9	216.783	11.12	-4.28503	9.87006e-69	3.46239e-66	--	PREDICTED: BURP domain protein RD22-like isoform X2 [Prunus mume]	-	-	-	-	-	-	-
Unigene0034651	5285	5345	4410	861	948	1131	62.21	56.86	61.01	8.62	10.43	11.03	60.0267	10.0267	-2.58176	9.11558e-68	3.16219e-65	UGT86A1	PREDICTED: UDP-glycosyltransferase 86A1-like [Prunus mume]	-	-	-	-	-	GO:0016757//transferase activity, transferring glycosyl groups	-
Unigene0031940	1321	1159	995	5	5	0	28.8	22.83	25.49	0.09	0.1	0	25.7067	0.0633333	-8.66496	1.93243e-67	6.62992e-65	--	-	-	-	-	-	-	-	-
Unigene0018591	1049	783	799	5	7	3	56.85	38.35	50.9	0.23	0.35	0.13	48.7	0.236667	-7.68492	3.48092e-67	1.18128e-64	CYS6	PREDICTED: cysteine proteinase inhibitor A-like [Prunus mume]	-	-	-	-	GO:0043231//intracellular membrane-bounded organelle;GO:0044444//cytoplasmic part	GO:0004857//enzyme inhibitor activity;GO:0046914//transition metal ion binding	GO:0006970//response to osmotic stress;GO:0010466//negative regulation of peptidase activity
Unigene0027742	513	648	486	51	40	54	4.28	4.88	4.76	0.36	0.31	0.37	4.64	0.346667	-3.7425	4.51458e-67	1.51559e-64	--	PREDICTED: uncharacterized protein LOC103341630 [Prunus mume]	-	-	-	-	-	-	-
Unigene0025978	558	515	430	3940	3388	3398	9.35	7.8	8.47	56.14	53.08	47.17	8.54	52.13	2.60981	6.79445e-67	2.2567e-64	ALDC	PREDICTED: fructose-bisphosphate aldolase, cytoplasmic isozyme [Prunus mume]	Metabolism;Metabolism;Metabolism;Metabolism;Metabolism;Metabolism;Metabolism;Metabolism	Global and overview maps;Global and overview maps;Global and overview maps;Global and overview maps;Carbohydrate metabolism;Energy metabolism;Carbohydrate metabolism;Carbohydrate metabolism	ko01100//Metabolic pathways;ko01110//Biosynthesis of secondary metabolites;ko01200//Carbon metabolism;ko01230//Biosynthesis of amino acids;ko00010//Glycolysis / Gluconeogenesis;ko00710//Carbon fixation in photosynthetic organisms;ko00030//Pentose phosphate pathway;ko00051//Fructose and mannose metabolism	K01623;K01623;K01623;K01623;K01623;K01623;K01623;K01623	-	GO:0016832//aldehyde-lyase activity	GO:0006090//pyruvate metabolic process
Unigene0035272	121	138	102	1078	1076	1447	2.1	2.17	2.09	15.94	17.5	20.85	2.12	18.0967	3.09359	8.87732e-67	2.91746e-64	XTH32	PREDICTED: probable xyloglucan endotransglucosylase/hydrolase protein 32 [Prunus mume]	-	-	-	-	GO:0005576//extracellular region;GO:0030312//external encapsulating structure	GO:0016758//transferase activity, transferring hexosyl groups;GO:0016787//hydrolase activity	GO:0044036//cell wall macromolecule metabolic process;GO:0044042//glucan metabolic process;GO:0044085//cellular component biogenesis;GO:0045229//external encapsulating structure organization
Unigene0001056	21	36	22	821	1013	850	0.39	0.6	0.48	12.94	17.55	13.05	0.49	14.5133	4.88845	3.49996e-66	1.13825e-63	--	PREDICTED: uncharacterized protein LOC103942829 isoform X2 [Pyrus x bretschneideri]	-	-	-	-	-	-	-
Unigene0022653	11317	14074	11015	1941	2280	2245	348.23	391.4	398.37	50.79	65.59	57.22	379.333	57.8667	-2.71266	1.7003e-65	5.47269e-63	--	PREDICTED: lachrymatory-factor synthase-like isoform X2 [Prunus mume]	-	-	-	-	-	-	-
Unigene0027589	4617	3984	3724	665	549	520	179.03	139.62	169.72	21.93	19.9	16.7	162.79	19.51	-3.06073	3.87671e-65	1.23505e-62	--	PREDICTED: uncharacterized protein LOC107881011 [Prunus mume]	-	-	-	-	-	-	-
Unigene0004756	284	281	260	2295	2401	2273	3.93	3.51	4.22	26.98	31.03	26.03	3.88667	28.0133	2.84951	5.48718e-65	1.73046e-62	--	hypothetical protein PRUPE_7G110100 [Prunus persica]	-	-	-	-	-	-	-
Unigene0009712	217	255	153	1913	1504	1674	1.91	2.03	1.58	14.31	12.37	12.2	1.84	12.96	2.81629	6.69784e-65	2.09113e-62	CNGC1	PREDICTED: cyclic nucleotide-gated ion channel 1-like [Prunus mume]	Organismal Systems	Environmental adaptation	ko04626//Plant-pathogen interaction	K05391	-	-	-
Unigene0022631	1343	2192	1328	52	90	88	19.41	28.63	22.56	0.64	1.22	1.05	23.5333	0.97	-4.60058	1.04264e-64	3.22299e-62	UGT79B6	PREDICTED: UDP-glycosyltransferase 79B6-like [Prunus mume]	-	-	-	-	-	GO:0016758//transferase activity, transferring hexosyl groups	-
Unigene0026168	606	608	670	5501	5247	5683	5.42	4.91	7.04	41.82	43.86	42.09	5.79	42.59	2.87888	1.25456e-64	3.84006e-62	ACX4	PREDICTED: acyl-coenzyme A oxidase 4, peroxisomal [Prunus mume]	Metabolism;Metabolism;Cellular Processes;Metabolism;Metabolism;Metabolism;Metabolism	Global and overview maps;Global and overview maps;Transport and catabolism;Global and overview maps;Lipid metabolism;Lipid metabolism;Lipid metabolism	ko01100//Metabolic pathways;ko01110//Biosynthesis of secondary metabolites;ko04146//Peroxisome;ko01212//Fatty acid metabolism;ko00071//Fatty acid degradation;ko00592//alpha-Linolenic acid metabolism;ko01040//Biosynthesis of unsaturated fatty acids	K00232;K00232;K00232;K00232;K00232;K00232;K00232	GO:0005777//peroxisome	GO:0000166//nucleotide binding;GO:0016634//oxidoreductase activity, acting on the CH-CH group of donors, oxygen as acceptor	GO:0003006//developmental process involved in reproduction;GO:0006625//protein targeting to peroxisome;GO:0009057//macromolecule catabolic process;GO:0009062//fatty acid catabolic process
Unigene0030937	679	895	661	0	8	6	7.72	9.19	8.83	0	0.09	0.06	8.58	0.05	-7.42291	2.13427e-64	6.46932e-62	CYP750A1	PREDICTED: cytochrome P450 CYP736A12-like [Prunus mume]	-	-	-	-	-	GO:0016491//oxidoreductase activity;GO:0046906//tetrapyrrole binding;GO:0046914//transition metal ion binding	GO:0044710//single-organism metabolic process
Unigene0000049	57319	82025	53244	12369	9925	15004	391.88	506.84	427.85	71.91	63.44	84.97	442.19	73.44	-2.59003	5.43814e-64	1.63254e-61	RD22	PREDICTED: BURP domain protein RD22-like [Prunus mume]	-	-	-	-	-	-	-
Unigene0017880	1418	1450	1076	232	210	198	15.74	14.55	14.04	2.19	2.18	1.82	14.7767	2.06333	-2.84027	6.39782e-64	1.90234e-61	LHT1	PREDICTED: lysine histidine transporter 1-like isoform X2 [Prunus mume]	-	-	-	-	GO:0031224//intrinsic component of membrane	-	-
Unigene0025310	681	986	617	39	30	61	10.53	13.78	11.22	0.51	0.43	0.78	11.8433	0.573333	-4.36856	7.4865e-64	2.20506e-61	BCAT1	PREDICTED: branched-chain-amino-acid aminotransferase 2, chloroplastic-like isoform X2 [Prunus mume]	Metabolism;Metabolism;Metabolism;Metabolism;Metabolism;Metabolism;Metabolism;Metabolism;Metabolism	Global and overview maps;Global and overview maps;Global and overview maps;Amino acid metabolism;Global and overview maps;Amino acid metabolism;Metabolism of cofactors and vitamins;Amino acid metabolism;Biosynthesis of other secondary metabolites	ko01100//Metabolic pathways;ko01110//Biosynthesis of secondary metabolites;ko01230//Biosynthesis of amino acids;ko00270//Cysteine and methionine metabolism;ko01210//2-Oxocarboxylic acid metabolism;ko00280//Valine, leucine and isoleucine degradation;ko00770//Pantothenate and CoA biosynthesis;ko00290//Valine, leucine and isoleucine biosynthesis;ko00966//Glucosinolate biosynthesis	K00826;K00826;K00826;K00826;K00826;K00826;K00826;K00826;K00826	-	GO:0004084//branched-chain-amino-acid transaminase activity	GO:0006520//cellular amino acid metabolic process
Unigene0034249	3519	5479	3488	476	317	572	13.25	18.65	15.44	1.52	1.12	1.78	15.78	1.47333	-3.42094	8.21648e-64	2.39745e-61	AtMg00310	non-ltr retroelement reverse transcriptase [Rosa rugosa]	-	-	-	-	-	-	-
Unigene0017416	65	75	35	2497	1172	2473	0.34	0.35	0.21	10.96	5.66	10.58	0.3	9.06667	4.91754	1.7253e-63	4.98755e-61	ABCG36	PREDICTED: ABC transporter G family member 36-like isoform X2 [Prunus mume]	-	-	-	-	-	-	-
Unigene0019049	3277	3652	2828	889	806	810	66.11	66.59	67.06	15.25	15.2	13.54	66.5867	14.6633	-2.18302	3.93648e-63	1.12753e-60	KAI2	PREDICTED: probable esterase KAI2 [Prunus mume]	-	-	-	-	GO:0044444//cytoplasmic part	GO:0003824//catalytic activity	GO:0009411//response to UV;GO:0009639//response to red or far red light;GO:0009812//flavonoid metabolic process;GO:0034285//response to disaccharide
Unigene0028460	3116	3261	2851	639	409	624	25.08	23.72	26.97	4.37	3.08	4.16	25.2567	3.87	-2.70626	5.08202e-63	1.44242e-60	CNGC1	PREDICTED: cyclic nucleotide-gated ion channel 1-like [Prunus mume]	-	-	-	-	-	-	-
Unigene0033885	1161	2862	873	8	11	6	11.65	25.95	10.29	0.07	0.1	0.05	15.9633	0.0733333	-7.76608	7.179e-63	2.01924e-60	SULTR3;5	PREDICTED: probable sulfate transporter 3.5 [Prunus mume]	-	-	-	-	GO:0016020//membrane	GO:0015103//inorganic anion transmembrane transporter activity;GO:0015291//secondary active transmembrane transporter activity	GO:0008272//sulfate transport;GO:0044763//single-organism cellular process
Unigene0022487	0	5	2	1948	2260	2300	0	0.09	0.05	32.7	41.71	37.61	0.0466667	37.34	9.64411	1.19753e-62	3.33823e-60	--	hypothetical protein PRUPE_5G095000, partial [Prunus persica]	-	-	-	-	-	-	-
Unigene0029971	0	2	4	3340	2752	2631	0	0.02	0.06	38.01	34.43	29.16	0.0266667	33.8667	10.3106	1.22618e-62	3.38783e-60	At3g47200	PREDICTED: UPF0481 protein At3g47200-like [Prunus mume]	-	-	-	-	-	-	-
Unigene0019239	30	18	22	1076	850	741	2.38	1.29	2.06	72.73	63.17	48.79	1.91	61.5633	5.01043	3.5352e-62	9.6818e-60	--	PREDICTED: uncharacterized transmembrane protein DDB_G0289901-like [Prunus mume]	-	-	-	-	-	-	-
Unigene0002676	15	14	4	659	692	651	0.22	0.19	0.07	8.31	9.59	8	0.16	8.63333	5.75377	4.56782e-62	1.2401e-59	NOP56	PREDICTED: nucleolar protein 56-like [Prunus mume]	Genetic Information Processing	Translation	ko03008//Ribosome biogenesis in eukaryotes	K14564	-	-	-
Unigene0034222	534	658	481	35	36	56	2.76	3.07	2.92	0.15	0.17	0.24	2.91667	0.186667	-3.96578	5.95319e-62	1.60228e-59	ALP1	protein ALP1-like [Cajanus cajan]	-	-	-	-	-	-	-
Unigene0003183	905	1308	799	33	56	65	12.7	16.59	13.18	0.39	0.73	0.76	14.1567	0.626667	-4.49764	7.64449e-62	2.0399e-59	UGT92A1	PREDICTED: UDP-glycosyltransferase 92A1-like [Prunus mume]	-	-	-	-	-	-	-
Unigene0027835	9807	13160	8361	482	699	1002	88.92	107.85	89.11	3.72	5.93	7.53	95.2933	5.72667	-4.05661	2.12147e-61	5.61308e-59	PILS5	PREDICTED: uncharacterized transporter C5D6.04 [Ziziphus jujuba]	-	-	-	-	-	-	GO:0044763//single-organism cellular process
Unigene0022814	689	649	557	25	10	34	9.54	8.12	9.07	0.29	0.13	0.39	8.91	0.27	-5.04439	2.01458e-60	5.28548e-58	At3g07870	PREDICTED: F-box/kelch-repeat protein At3g06240-like [Prunus mume]	-	-	-	-	-	-	-
Unigene0000401	458	619	482	4	5	10	4.68	5.71	5.78	0.03	0.05	0.08	5.39	0.0533333	-6.6591	3.3475e-60	8.70935e-58	--	PREDICTED: AT-hook motif nuclear-localized protein 16 [Prunus mume]	-	-	-	-	-	-	-
Unigene0028137	993	778	643	5	13	2	37.29	26.41	28.38	0.16	0.46	0.06	30.6933	0.226667	-7.08121	4.03635e-60	1.04148e-57	HIPP03	PREDICTED: heavy metal-associated isoprenylated plant protein 3-like [Prunus mume]	-	-	-	-	-	-	-
Unigene0000162	703	844	530	82	80	97	7.98	8.65	7.07	0.79	0.85	0.91	7.9	0.85	-3.21632	4.12479e-60	1.05557e-57	--	-	-	-	-	-	-	-	-
Unigene0034437	1323	1307	1001	70	112	89	10.85	9.68	9.64	0.49	0.86	0.6	10.0567	0.65	-3.95157	5.2341e-60	1.32857e-57	At2g19130	hypothetical protein PRUPE_ppa001576mg [Prunus persica]	-	-	-	-	-	GO:0004672//protein kinase activity	GO:0006796//phosphate-containing compound metabolic process
Unigene0013576	626	732	628	17	1	11	9.5	10.04	11.2	0.22	0.01	0.14	10.2467	0.123333	-6.37645	5.9434e-60	1.49644e-57	UGT83A1	PREDICTED: UDP-glycosyltransferase 83A1-like [Prunus mume]	-	-	-	-	-	-	-
Unigene0005243	6	17	5	762	512	735	0.08	0.2	0.08	8.36	6.18	7.86	0.12	7.46667	5.95936	6.64246e-60	1.65907e-57	eif2b2	PREDICTED: translation initiation factor eIF-2B subunit beta [Prunus mume]	Genetic Information Processing	Translation	ko03013//RNA transport	K03754	-	-	GO:0044237//cellular metabolic process
Unigene0027076	2397	2480	1803	78	137	172	30.98	28.97	27.39	0.86	1.66	1.84	29.1133	1.45333	-4.32424	7.34479e-60	1.81993e-57	PILS2	PREDICTED: uncharacterized transporter YBR287W-like [Prunus mume]	-	-	-	-	-	-	-
Unigene0027817	17	15	5	573	524	569	0.18	0.15	0.06	5.22	5.25	5.05	0.13	5.17333	5.31451	1.62718e-59	3.98657e-57	NRPA2	PREDICTED: DNA-directed RNA polymerase I subunit 2-like [Malus domestica]	Metabolism;Metabolism;Metabolism;Genetic Information Processing	Global and overview maps;Nucleotide metabolism;Nucleotide metabolism;Transcription	ko01100//Metabolic pathways;ko00230//Purine metabolism;ko00240//Pyrimidine metabolism;ko03020//RNA polymerase	K03002;K03002;K03002;K03002	-	-	-
Unigene0025662	414	431	357	21	17	15	8.26	7.77	8.37	0.36	0.32	0.25	8.13333	0.31	-4.71351	1.63442e-59	3.98657e-57	--	PREDICTED: bifunctional epoxide hydrolase 2-like [Prunus mume]	-	-	-	-	-	-	-
Unigene0015374	133	135	133	1488	1005	1497	2.13	1.95	2.5	20.25	15.04	19.85	2.19333	18.38	3.06694	3.08625e-59	7.46945e-57	CNGC20	Ribosomal protein L34Ae [Corchorus olitorius]	-	-	-	-	GO:0030529//intracellular ribonucleoprotein complex	-	GO:0001708//cell fate specification;GO:0006637//acyl-CoA metabolic process;GO:0006997//nucleus organization;GO:0007015//actin filament organization;GO:0007017//microtubule-based process;GO:0010629//negative regulation of gene expression;GO:0016571//histone methylation;GO:0043623//cellular protein complex assembly;GO:0048285//organelle fission;GO:0048580//regulation of post-embryonic development;G…
Unigene0022846	2492	2928	2018	2	3	0	30.62	32.51	29.14	0.02	0.03	0	30.7567	0.0166667	-10.8497	5.01717e-59	1.20493e-56	--	PREDICTED: pathogen-related protein-like [Prunus mume]	-	-	-	-	-	-	-
Unigene0021997	36	56	42	844	914	775	0.62	0.88	0.85	12.41	14.78	11.1	0.783333	12.7633	4.02623	1.8288e-58	4.35854e-56	DLO2	PREDICTED: protein DMR6-LIKE OXYGENASE 2-like [Prunus mume]	-	-	-	-	-	-	-
Unigene0001545	605	561	562	3	9	4	5.03	4.21	5.49	0.02	0.07	0.03	4.91	0.04	-6.93958	2.74668e-58	6.49651e-56	ACA8	PREDICTED: calcium-transporting ATPase 10, plasma membrane-type-like isoform X7 [Fragaria vesca subsp. vesca] [Fragaria vesca]	-	-	-	-	-	-	-
Unigene0007321	1193	1181	1009	5314	4957	5278	19.27	17.25	19.16	73	74.88	70.63	18.56	72.8367	1.97247	2.97942e-58	6.96608e-56	--	PREDICTED: PIN2/TERF1-interacting telomerase inhibitor 1 [Prunus mume]	-	-	-	-	-	-	-
Unigene0017697	984	687	745	50	49	60	21.81	13.76	19.41	0.94	1.02	1.1	18.3267	1.02	-4.1673	2.98983e-58	6.96608e-56	PER17	PREDICTED: peroxidase 17-like [Prunus mume]	Metabolism;Metabolism;Metabolism	Global and overview maps;Global and overview maps;Biosynthesis of other secondary metabolites	ko01100//Metabolic pathways;ko01110//Biosynthesis of secondary metabolites;ko00940//Phenylpropanoid biosynthesis	K00430;K00430;K00430	-	GO:0003824//catalytic activity;GO:0043169//cation binding;GO:0046906//tetrapyrrole binding	GO:0006950//response to stress;GO:0044710//single-organism metabolic process
Unigene0002995	4152	5687	4061	1317	1144	1340	58.45	72.36	67.19	15.76	15.06	15.62	66	15.48	-2.09206	4.84141e-57	1.11966e-54	ADT6	PREDICTED: LOW QUALITY PROTEIN: arogenate dehydratase/prephenate dehydratase 6, chloroplastic-like [Prunus mume]	Metabolism;Metabolism;Metabolism;Metabolism	Global and overview maps;Global and overview maps;Global and overview maps;Amino acid metabolism	ko01100//Metabolic pathways;ko01110//Biosynthesis of secondary metabolites;ko01230//Biosynthesis of amino acids;ko00400//Phenylalanine, tyrosine and tryptophan biosynthesis	K05359;K05359;K05359;K05359	-	GO:0031406//carboxylic acid binding	GO:0006558//L-phenylalanine metabolic process
Unigene0000155	472	549	322	12	4	11	3.21	3.37	2.57	0.07	0.03	0.06	3.05	0.0533333	-5.83763	1.57018e-55	3.6046e-53	N	PREDICTED: TMV resistance protein N-like isoform X1 [Prunus mume]	-	-	-	-	-	-	-
Unigene0028392	1744	1948	1502	468	390	398	36.94	37.29	37.39	8.43	7.72	6.98	37.2067	7.71	-2.27076	1.84653e-55	4.20807e-53	PBG1	PREDICTED: proteasome subunit beta type-4 isoform X1 [Prunus mume]	Genetic Information Processing	Folding, sorting and degradation	ko03050//Proteasome	K02736	-	-	-
Unigene0028015	3492	4488	3365	585	319	597	17.71	20.57	20.06	2.52	1.51	2.51	19.4467	2.18	-3.15712	1.96377e-55	4.44281e-53	--	hypothetical protein PRUPE_3G194100 [Prunus persica]	-	-	-	-	-	-	-
Unigene0030121	763	931	690	93	84	63	4.92	5.42	5.23	0.51	0.51	0.34	5.19	0.453333	-3.51709	3.53414e-55	7.93809e-53	KIN14G	PREDICTED: kinesin-4 [Prunus mume]	-	-	-	-	-	-	-
Unigene0031662	7357	11288	8024	831	997	689	123.55	171.33	158.38	11.87	15.65	9.58	151.087	12.3667	-3.61085	1.11585e-54	2.48843e-52	EXPA15	PREDICTED: expansin-A15 [Prunus mume]	-	-	-	-	-	-	GO:0071555//cell wall organization
Unigene0036492	27	25	18	524	395	598	1.54	1.29	1.21	25.48	21.12	28.33	1.34667	24.9767	4.21312	1.21031e-54	2.67994e-52	--	-	-	-	-	-	-	-	-
Unigene0035629	396	411	366	31	23	31	4.4	4.13	4.78	0.29	0.24	0.29	4.43667	0.273333	-4.02074	1.98899e-54	4.37312e-52	UGT73C5	PREDICTED: scopoletin glucosyltransferase-like [Prunus mume]	-	-	-	-	-	GO:0016757//transferase activity, transferring glycosyl groups	-
Unigene0010332	9	15	17	505	608	620	0.16	0.24	0.35	7.46	9.87	8.92	0.25	8.75	5.12928	2.40122e-54	5.24256e-52	GA2OX2	PREDICTED: gibberellin 2-beta-dioxygenase 2-like [Prunus mume]	Metabolism;Metabolism	Global and overview maps;Metabolism of terpenoids and polyketides	ko01110//Biosynthesis of secondary metabolites;ko00904//Diterpenoid biosynthesis	K04125;K04125	-	GO:0043169//cation binding;GO:0045543//gibberellin 2-beta-dioxygenase activity	GO:0009685//gibberellin metabolic process;GO:0051553//flavone biosynthetic process
Unigene0035006	1119	1477	932	6236	6720	6965	9.74	11.62	9.53	46.15	54.68	50.21	10.2967	50.3467	2.28972	1.0244e-53	2.22103e-51	--	hypothetical protein PRUPE_2G033300 [Prunus persica]	-	-	-	-	-	-	-
Unigene0000647	960	992	702	3703	3186	3942	8.04	7.51	6.91	26.38	24.96	27.36	7.48667	26.2333	1.80901	1.2692e-53	2.7328e-51	--	PREDICTED: protein AATF-like isoform X2 [Malus domestica]	-	-	-	-	-	-	-
Unigene0009000	1423	1497	1081	9610	11249	9274	11.51	10.94	10.28	66.1	85.08	62.14	10.91	71.1067	2.70433	2.20315e-53	4.71127e-51	CNGC1	PREDICTED: cyclic nucleotide-gated ion channel 1-like [Prunus mume]	Organismal Systems	Environmental adaptation	ko04626//Plant-pathogen interaction	K05391	-	-	-
Unigene0000687	33	57	41	675	708	689	0.59	0.92	0.86	10.22	11.79	10.16	0.79	10.7233	3.76276	2.33871e-53	4.96713e-51	OFUT8	hypothetical protein PRUPE_4G064100 [Prunus persica]	-	-	-	-	-	-	-
Unigene0027566	653	795	570	2783	2680	3007	10.05	11.06	10.31	36.43	38.57	38.35	10.4733	37.7833	1.85103	4.32172e-53	9.11679e-51	XXT2	calmodulin binding transcription activator 1 [Malus domestica]	-	-	-	-	GO:0031224//intrinsic component of membrane	GO:0016757//transferase activity, transferring glycosyl groups	-
Unigene0035225	1745	1713	1656	250	280	338	17.02	15.1	18.98	2.07	2.55	2.73	17.0333	2.45	-2.79751	5.80579e-53	1.21653e-50	SULTR3;1	PREDICTED: sulfate transporter 3.1-like [Prunus mume]	-	-	-	-	GO:0009536//plastid;GO:0031224//intrinsic component of membrane	GO:0015103//inorganic anion transmembrane transporter activity	GO:0008272//sulfate transport;GO:0044763//single-organism cellular process
Unigene0034180	552	668	479	58	31	63	3.23	3.54	3.3	0.29	0.17	0.31	3.35667	0.256667	-3.70906	6.21739e-53	1.29409e-50	CAS	PREDICTED: exportin-2 [Malus domestica]	-	-	-	-	-	-	GO:0006810//transport;GO:0044237//cellular metabolic process;GO:0044710//single-organism metabolic process;GO:0050896//response to stimulus;GO:0071704//organic substance metabolic process
Unigene0020930	0	6	6	623	643	795	0	0.11	0.14	10.83	12.28	13.46	0.0833333	12.19	7.19259	2.07476e-52	4.28981e-50	TL1	thaumatin-like protein [Prunus persica]	-	-	-	-	-	-	-
Unigene0000569	397	530	337	10	12	23	4.2	5.06	4.19	0.09	0.12	0.2	4.48333	0.136667	-5.03584	2.13543e-52	4.3862e-50	ABCG36	PREDICTED: ABC transporter G family member 29-like [Prunus mume]	-	-	-	-	-	GO:0017111//nucleoside-triphosphatase activity;GO:0032550//purine ribonucleoside binding	-
Unigene0011093	1524	1657	1170	5329	4758	5511	13.64	13.41	12.31	40.56	39.82	40.86	13.12	40.4133	1.62306	2.71094e-52	5.53191e-50	PUB16	PREDICTED: LOW QUALITY PROTEIN: U-box domain-containing protein 16 [Prunus mume]	-	-	-	-	-	GO:0019787//ubiquitin-like protein transferase activity	GO:0032446//protein modification by small protein conjugation
Unigene0035432	4	8	2	633	672	1152	0.02	0.04	0.01	3.34	3.9	5.92	0.0233333	4.38667	7.55459	7.4241e-52	1.50512e-49	CNGC1	PREDICTED: cyclic nucleotide-gated ion channel 1-like [Prunus mume]	Organismal Systems	Environmental adaptation	ko04626//Plant-pathogen interaction	K05391	-	-	-
Unigene0023394	1570	1698	1243	0	4	1	9.22	9.01	8.58	0	0.02	0	8.93667	0.00666667	-10.3886	2.94021e-51	5.92235e-49	XA21	PREDICTED: LOW QUALITY PROTEIN: LRR receptor-like serine/threonine-protein kinase FLS2 [Prunus mume]	Organismal Systems;Environmental Information Processing	Environmental adaptation;Signal transduction	ko04626//Plant-pathogen interaction;ko04016//MAPK signaling pathway - plant	K13420;K13420	-	-	-
Unigene0035256	468	692	434	0	7	7	9.24	12.35	10.07	0	0.13	0.11	10.5533	0.08	-7.04348	5.02459e-51	1.00559e-48	JMT	PREDICTED: jasmonate O-methyltransferase [Prunus mume]	Metabolism;Metabolism	Global and overview maps;Lipid metabolism	ko01110//Biosynthesis of secondary metabolites;ko00592//alpha-Linolenic acid metabolism	K08241;K08241	-	-	-
Unigene0021723	408	483	398	42	24	42	7.21	7.72	8.27	0.63	0.4	0.61	7.73333	0.546667	-3.82236	6.96641e-51	1.38534e-48	At3g06240	PREDICTED: F-box/kelch-repeat protein At3g06240-like [Prunus mume]	-	-	-	-	-	-	-
Unigene0011102	107	71	67	1078	1143	1093	2.33	1.4	1.71	19.94	23.25	19.7	1.81333	20.9633	3.53115	8.62614e-51	1.70454e-48	--	PREDICTED: uncharacterized protein LOC103339526 [Prunus mume]	-	-	-	-	-	-	-
Unigene0007996	388	386	328	7	3	10	6.27	5.64	6.23	0.1	0.05	0.13	6.04667	0.0933333	-6.0176	9.10354e-51	1.78756e-48	BAHD1	PREDICTED: BAHD acyltransferase At5g47980-like [Prunus mume]	Metabolism;Metabolism;Metabolism;Metabolism;Metabolism	Global and overview maps;Global and overview maps;Biosynthesis of other secondary metabolites;Biosynthesis of other secondary metabolites;Biosynthesis of other secondary metabolites	ko01100//Metabolic pathways;ko01110//Biosynthesis of secondary metabolites;ko00940//Phenylpropanoid biosynthesis;ko00941//Flavonoid biosynthesis;ko00945//Stilbenoid, diarylheptanoid and gingerol biosynthesis	K13065;K13065;K13065;K13065;K13065	-	-	-
Unigene0027951	821	932	635	148	151	158	8.01	8.22	7.29	1.23	1.38	1.28	7.84	1.29667	-2.59605	9.38976e-51	1.83224e-48	RR21	PREDICTED: two-component response regulator ARR14-like [Prunus mume]	Environmental Information Processing	Signal transduction	ko04075//Plant hormone signal transduction	K14491	-	-	-
Unigene0032583	1578	1848	1645	237	202	345	22.43	23.74	27.48	2.86	2.68	4.06	24.55	3.2	-2.93958	1.19167e-50	2.31088e-48	UGT76A2	PREDICTED: UDP-glucose iridoid glucosyltransferase-like [Prunus mume]	-	-	-	-	-	-	-
Unigene0015480	2135	2464	1928	592	598	720	42.46	44.29	45.07	10.01	11.12	11.86	43.94	10.9967	-1.99847	2.47779e-50	4.77526e-48	--	PREDICTED: uncharacterized protein LOC103328386 [Prunus mume]	-	-	-	-	-	-	-
Unigene0020648	460	424	330	2376	2138	2198	5.76	4.8	4.86	25.3	25.04	22.8	5.14	24.38	2.24586	7.22907e-50	1.38466e-47	RPT2	PREDICTED: root phototropism protein 2 isoform X2 [Prunus mume]	-	-	-	-	-	-	GO:0009606//tropism;GO:0050794//regulation of cellular process
Unigene0034846	520	602	458	10	13	32	12.81	13.4	13.26	0.21	0.3	0.65	13.1567	0.386667	-5.08856	7.75196e-50	1.47576e-47	SWEET17	PREDICTED: bidirectional sugar transporter SWEET17 [Prunus mume]	-	-	-	-	-	-	-
Unigene0032696	1125	1184	723	69	100	113	9.71	9.24	7.34	0.51	0.81	0.81	8.76333	0.71	-3.62559	9.11177e-50	1.72411e-47	PUB32	hypothetical protein PRUPE_ppa018581mg [Prunus persica]	-	-	-	-	-	GO:0016301//kinase activity	GO:0006464//cellular protein modification process;GO:0006796//phosphate-containing compound metabolic process
Unigene0000298	665	1005	555	49	64	74	2.35	3.22	2.31	0.15	0.21	0.22	2.62667	0.193333	-3.76407	1.0674e-49	2.00755e-47	N	nematode resistance-like protein [Prunus cerasifera]	-	-	-	-	-	-	-
Unigene0020773	61	46	35	1213	1382	3007	1.42	0.96	0.95	23.93	29.97	57.78	1.11	37.2267	5.0677	1.16092e-49	2.17037e-47	--	PREDICTED: desiccation-related protein PCC13-62-like [Prunus mume]	-	-	-	-	-	-	-
Unigene0030943	1671	1435	1230	101	159	124	22.99	17.85	19.89	1.18	2.05	1.41	20.2433	1.54667	-3.71021	1.44608e-49	2.68738e-47	--	hypothetical protein PRUPE_ppa013680mg [Prunus persica]	-	-	-	-	-	-	-
Unigene0013844	112	108	82	1062	1448	1256	6.15	5.36	5.3	49.62	74.39	57.16	5.60333	60.39	3.42995	1.53145e-49	2.82919e-47	--	hypothetical protein PRUPE_ppa016964mg [Prunus persica]	-	-	-	-	-	-	-
Unigene0000462	319	393	256	9	12	12	3.43	3.82	3.24	0.08	0.12	0.11	3.49667	0.103333	-5.0806	4.31033e-49	7.91605e-47	--	hypothetical protein PRUPE_1G235400 [Prunus persica]	-	-	-	-	-	-	-
Unigene0036520	118	191	136	3603	1644	3941	0.62	0.9	0.84	16.02	8.04	17.07	0.786667	13.71	4.12333	5.50521e-49	1.00513e-46	RE2	Retrovirus-related Pol polyprotein from transposon TNT 1-94 [Cajanus cajan]	Metabolism;Metabolism;Metabolism;Genetic Information Processing	Global and overview maps;Nucleotide metabolism;Nucleotide metabolism;Transcription	ko01100//Metabolic pathways;ko00230//Purine metabolism;ko00240//Pyrimidine metabolism;ko03020//RNA polymerase	K03006;K03006;K03006;K03006	-	-	-
Unigene0027569	1559	1791	1490	85	67	28	26.09	27.09	29.31	1.21	1.05	0.39	27.4967	0.883333	-4.96015	1.19596e-48	2.17088e-46	At3g13620	PREDICTED: probable polyamine transporter At3g13620 [Prunus mume]	-	-	-	-	GO:0016020//membrane	-	-
Unigene0023038	132	216	144	3805	1681	3300	0.63	0.94	0.81	15.56	7.56	13.15	0.793333	12.09	3.92974	1.36863e-48	2.46995e-46	RE2	OSIGBa0134J07.9 [Oryza sativa Indica Group]	Metabolism;Metabolism;Metabolism;Genetic Information Processing	Global and overview maps;Nucleotide metabolism;Nucleotide metabolism;Transcription	ko01100//Metabolic pathways;ko00230//Purine metabolism;ko00240//Pyrimidine metabolism;ko03020//RNA polymerase	K03006;K03006;K03006;K03006	-	-	-
Unigene0034788	314	358	296	10	15	11	6.15	6.34	6.82	0.17	0.27	0.18	6.43667	0.206667	-4.96094	1.50339e-48	2.69755e-46	RPS20B	PREDICTED: 40S ribosomal protein S20-2 [Ziziphus jujuba]	Genetic Information Processing	Translation	ko03010//Ribosome	K02969	GO:0044391//ribosomal subunit	GO:0005198//structural molecule activity	GO:0010467//gene expression
Unigene0034473	1123	947	952	6394	6525	6398	26.52	20.21	26.42	128.37	144.04	125.13	24.3833	132.513	2.44217	1.92844e-48	3.44044e-46	CYCLASE2	PREDICTED: kynurenine formamidase-like [Prunus mume]	-	-	-	-	-	-	-
Unigene0000280	86251	132883	85700	316	698	286	227.7	317.06	265.92	0.71	1.72	0.63	270.227	1.02	-8.04946	5.26494e-48	9.33959e-46	ORF1	RNA replication protein [Anthurium amnicola]	-	-	-	-	-	-	-
Unigene0007882	3521	4470	3088	12715	11949	14095	19.33	22.18	19.93	59.37	61.34	64.11	20.48	61.6067	1.58887	8.15878e-48	1.43913e-45	NTMC2T6.1	PREDICTED: C2 domain-containing protein At1g53590 isoform X1 [Prunus mume]	-	-	-	-	-	-	-
Unigene0002793	332	448	319	11	20	14	4.56	5.56	5.14	0.13	0.26	0.16	5.08667	0.183333	-4.79418	1.74358e-47	3.05822e-45	CYP76M5	PREDICTED: cytochrome P450 76M5-like [Prunus mume]	Metabolism	Global and overview maps	ko01100//Metabolic pathways	K00512	-	GO:0016491//oxidoreductase activity;GO:0046906//tetrapyrrole binding;GO:0046914//transition metal ion binding	GO:0044710//single-organism metabolic process
Unigene0003408	457	558	317	29	35	28	4.5	4.96	3.67	0.24	0.32	0.23	4.37667	0.263333	-4.05487	4.03166e-47	7.03198e-45	--	hypothetical protein PRUPE_4G127700 [Prunus persica]	-	-	-	-	-	-	-
Unigene0000723	590	690	524	3709	2561	4309	2.9	3.07	3.03	15.51	11.78	17.55	3	14.9467	2.31679	6.28885e-47	1.0908e-44	At1g53430	PREDICTED: probable LRR receptor-like serine/threonine-protein kinase At1g53420 [Prunus mume]	-	-	-	-	-	-	-
Unigene0028449	319	627	385	4168	4506	4671	5.43	9.65	7.7	60.33	71.71	65.86	7.59333	65.9667	3.11893	9.26868e-47	1.59877e-44	CHY1	PREDICTED: 3-hydroxyisobutyryl-CoA hydrolase 1-like [Prunus mume]	Metabolism;Metabolism;Metabolism;Metabolism;Metabolism	Global and overview maps;Global and overview maps;Amino acid metabolism;Metabolism of other amino acids;Carbohydrate metabolism	ko01100//Metabolic pathways;ko01200//Carbon metabolism;ko00280//Valine, leucine and isoleucine degradation;ko00410//beta-Alanine metabolism;ko00640//Propanoate metabolism	K05605;K05605;K05605;K05605;K05605	-	-	-
Unigene0026387	3562	5177	3447	294	148	427	16.93	22.24	19.25	1.19	0.66	1.68	19.4733	1.17667	-4.04872	1.27614e-46	2.18914e-44	ABCG39	PREDICTED: ABC transporter G family member 34-like [Pyrus x bretschneideri]	-	-	-	-	-	GO:0017111//nucleoside-triphosphatase activity;GO:0032550//purine ribonucleoside binding	-
Unigene0027567	1354	1542	1240	459	391	495	13.88	14.28	14.94	4	3.75	4.2	14.3667	3.98333	-1.85068	1.77186e-46	3.02291e-44	ENGASE1	PREDICTED: cytosolic endo-beta-N-acetylglucosaminidase 1 isoform X1 [Prunus mume]	Metabolism	Glycan biosynthesis and metabolism	ko00511//Other glycan degradation	K01227	-	GO:0016787//hydrolase activity	-
Unigene0002057	767	803	676	174	131	145	18.16	17.19	18.82	3.5	2.9	2.84	18.0567	3.08	-2.55153	2.916e-46	4.94785e-44	--	DUF4228 domain-containing protein [Cephalotus follicularis]	-	-	-	-	-	-	-
Unigene0030654	447	587	418	54	28	54	13.58	16.12	14.92	1.39	0.8	1.36	14.8733	1.18333	-3.6518	3.04502e-46	5.13884e-44	URA7	PREDICTED: probable disease resistance protein At5g66900 [Prunus mume]	-	-	-	-	-	-	-
Unigene0002663	0	1	4	1727	1614	1362	0	0.01	0.07	21.63	22.23	16.62	0.0266667	20.16	9.56224	4.56491e-46	7.66242e-44	--	MAM33 domain-containing protein [Cephalotus follicularis]	-	-	-	-	-	-	-
Unigene0033130	589	530	452	69	40	50	8.02	6.52	7.23	0.8	0.51	0.56	7.25667	0.623333	-3.54123	4.80861e-46	8.02832e-44	GT17	PREDICTED: probable xyloglucan galactosyltransferase GT17 [Prunus mume]	-	-	-	-	-	GO:0016740//transferase activity	-
Unigene0000177	3943	3618	3112	159	294	154	186.94	155.03	173.41	6.41	13.03	6.05	171.793	8.49667	-4.33763	5.96617e-46	9.90797e-44	--	hypothetical protein PRUPE_4G096800 [Prunus persica]	-	-	-	-	-	-	-
Unigene0029704	770	581	505	20	30	12	29.43	20.07	22.68	0.65	1.07	0.38	24.06	0.7	-5.10314	6.6989e-46	1.10659e-43	--	PREDICTED: uncharacterized protein LOC103343282 [Prunus mume]	-	-	-	-	-	-	-
Unigene0025578	274	359	220	1571	1286	1810	1.37	1.62	1.29	6.66	5.99	7.47	1.42667	6.70667	2.23295	8.09557e-46	1.33027e-43	RPP8L2	PREDICTED: probable disease resistance protein RF9 [Prunus mume]	-	-	-	-	-	-	-
Unigene0016254	19	15	16	440	478	409	1.12	0.8	1.1	21.98	26.25	19.9	1.00667	22.71	4.49567	1.804e-45	2.94883e-43	--	-	-	-	-	-	-	-	-
Unigene0025867	445	454	338	1752	1687	1883	12.44	11.47	11.11	41.65	44.09	43.6	11.6733	43.1133	1.88492	5.3307e-45	8.66821e-43	--	hypothetical protein PRUPE_3G142500 [Prunus persica]	-	-	-	-	-	-	-
Unigene0018187	817	885	739	4547	3013	4343	6.51	6.37	6.92	30.81	22.44	28.66	6.6	27.3033	2.04854	8.66016e-45	1.40093e-42	ALDH5F1	PREDICTED: succinate-semialdehyde dehydrogenase, mitochondrial [Prunus mume]	Metabolism;Metabolism;Metabolism	Global and overview maps;Amino acid metabolism;Carbohydrate metabolism	ko01100//Metabolic pathways;ko00250//Alanine, aspartate and glutamate metabolism;ko00650//Butanoate metabolism	K17761;K17761;K17761	-	-	-
Unigene0033596	686	704	455	5031	5537	4260	6.73	6.24	5.25	41.98	50.8	34.63	6.07333	42.47	2.80588	2.45086e-44	3.94425e-42	--	PREDICTED: dof zinc finger protein DOF3.4 [Prunus mume]	-	-	-	-	-	-	-
Unigene0010559	894	1232	840	4	1	0	4.57	5.7	5.05	0.02	0	0	5.10667	0.00666667	-9.5812	3.40685e-44	5.45462e-42	DSC1	PREDICTED: TMV resistance protein N-like isoform X1 [Prunus mume]	-	-	-	-	-	-	-
Unigene0006107	1902	1850	1695	485	452	448	29.61	26.03	31.01	6.42	6.58	5.78	28.8833	6.26	-2.206	4.06353e-44	6.47283e-42	COQ3	PREDICTED: ubiquinone biosynthesis O-methyltransferase, mitochondrial [Prunus mume]	Metabolism;Metabolism;Metabolism	Global and overview maps;Global and overview maps;Metabolism of cofactors and vitamins	ko01100//Metabolic pathways;ko01110//Biosynthesis of secondary metabolites;ko00130//Ubiquinone and other terpenoid-quinone biosynthesis	K00591;K00591;K00591	-	GO:0008168//methyltransferase activity	-
Unigene0011769	9	9	5	426	367	344	0.27	0.24	0.18	10.8	10.23	8.49	0.23	9.84	5.41895	6.93932e-44	1.09976e-41	--	PREDICTED: uncharacterized transmembrane protein DDB_G0289901-like [Prunus mume]	-	-	-	-	-	-	-
Unigene0016937	25683	34668	25152	9006	6116	8918	252.35	307.87	290.47	75.24	56.18	72.58	283.563	68	-2.06006	7.25493e-44	1.14397e-41	SHKA	PREDICTED: phospho-2-dehydro-3-deoxyheptonate aldolase 2, chloroplastic-like [Prunus mume]	Metabolism;Metabolism;Metabolism;Metabolism	Global and overview maps;Global and overview maps;Global and overview maps;Amino acid metabolism	ko01100//Metabolic pathways;ko01110//Biosynthesis of secondary metabolites;ko01230//Biosynthesis of amino acids;ko00400//Phenylalanine, tyrosine and tryptophan biosynthesis	K01626;K01626;K01626;K01626	-	GO:0003824//catalytic activity	GO:0008652//cellular amino acid biosynthetic process
Unigene0035347	550	649	513	4699	2747	5024	2.02	2.16	2.22	14.68	9.44	15.29	2.13333	13.1367	2.62242	8.12846e-44	1.27527e-41	AtMg00310	reverse transcriptase [Corchorus capsularis]	-	-	-	-	-	-	-
Unigene0007957	277	374	247	1566	1664	2104	16.23	19.81	17.01	78.02	91.15	102.11	17.6833	90.4267	2.35436	1.38827e-43	2.16715e-41	At1g53440	PREDICTED: probable LRR receptor-like serine/threonine-protein kinase At1g53440, partial [Prunus mume]	-	-	-	-	GO:0031224//intrinsic component of membrane	GO:0004672//protein kinase activity;GO:0032550//purine ribonucleoside binding	GO:0006464//cellular protein modification process;GO:0006796//phosphate-containing compound metabolic process
Unigene0030447	29	48	23	622	410	693	0.35	0.52	0.32	6.3	4.56	6.83	0.396667	5.89667	3.8939	1.54471e-43	2.39937e-41	At2g19130	PREDICTED: LOW QUALITY PROTEIN: G-type lectin S-receptor-like serine/threonine-protein kinase At4g27290 [Prunus mume]	-	-	-	-	-	-	-
Unigene0000281	73623	88798	67963	335	796	346	1948.6	2124.13	2114.22	7.54	19.7	7.59	2062.32	11.61	-7.47275	3.01241e-43	4.65596e-41	--	-	-	-	-	-	-	-	-
Unigene0027714	871	1119	610	127	105	91	14.06	16.33	11.58	1.74	1.58	1.22	13.99	1.51333	-3.20859	8.70904e-43	1.33943e-40	MAKR1	PREDICTED: probable membrane-associated kinase regulator 1 [Prunus mume]	-	-	-	-	-	-	-
Unigene0021679	351	253	288	2292	2324	2435	7.96	5.19	7.68	44.22	49.3	45.76	6.94333	46.4267	2.74125	1.42185e-42	2.17606e-40	--	NLI interacting factor [Corchorus olitorius]	-	-	-	-	-	GO:0003824//catalytic activity	-
Unigene0037151	4768	7862	3915	132	328	298	141.42	210.76	136.48	3.33	9.1	7.32	162.887	6.58333	-4.62891	2.27857e-42	3.4702e-40	--	PREDICTED: BURP domain protein RD22-like [Prunus mume]	-	-	-	-	-	-	-
Unigene0012761	145	218	156	1635	1025	1731	0.97	1.32	1.23	9.3	6.41	9.59	1.17333	8.43333	2.84549	2.29752e-42	3.48208e-40	At4g03230	PREDICTED: G-type lectin S-receptor-like serine/threonine-protein kinase At4g03230 isoform X1 [Prunus mume]	-	-	-	-	-	-	-
Unigene0016694	263	399	284	19	10	14	1.45	1.99	1.84	0.09	0.05	0.06	1.76	0.0666667	-4.72247	2.52458e-42	3.80772e-40	RE1	Retrovirus-related Pol polyprotein from transposon TNT 1-94 [Cajanus cajan]	-	-	-	-	-	-	-
Unigene0010504	6	10	2	436	667	522	0.18	0.27	0.07	11.22	18.87	13.08	0.173333	14.39	6.37537	2.92216e-42	4.38619e-40	--	hypothetical protein PRUPE_ppb022996mg [Prunus persica]	-	-	-	-	-	-	-
Unigene0030337	3301	2724	2583	20287	19279	16556	25.94	19.34	23.85	135.54	141.63	107.75	23.0433	128.307	2.47717	3.76687e-42	5.62706e-40	GCL1	PREDICTED: lanC-like protein GCL1 [Prunus mume]	-	-	-	-	-	-	-
Unigene0032830	7725	7887	6181	2993	2272	3109	140.73	129.86	132.35	46.36	38.7	46.91	134.313	43.99	-1.61036	3.84773e-42	5.72047e-40	PIP2-2	aquaporin PIP2 [Prunus humilis]	-	-	-	-	GO:0031224//intrinsic component of membrane	-	GO:0051234//establishment of localization
Unigene0027780	333	396	297	1954	1331	2029	2.9	3.11	3.04	14.45	10.82	14.62	3.01667	13.2967	2.14004	5.08454e-42	7.52343e-40	--	PREDICTED: protein IWS1 homolog [Prunus mume]	-	-	-	-	-	-	GO:0009987//cellular process;GO:0050789//regulation of biological process
Unigene0024274	950	955	807	16693	12430	40507	25.26	22.95	25.22	377.36	308.96	892	24.4767	526.107	4.42588	9.42972e-42	1.3887e-39	--	PREDICTED: proline-rich extensin-like protein EPR1 [Prunus mume]	-	-	-	-	-	-	-
Unigene0024372	6	0	2	598	480	782	0.27	0	0.11	23.19	20.46	29.53	0.126667	24.3933	7.58931	2.60569e-41	3.81935e-39	--	PREDICTED: early nodulin-75-like [Prunus mume]	-	-	-	-	-	-	-
Unigene0029618	576	642	512	0	3	3	15.35	15.46	16.03	0	0.07	0.07	15.6133	0.0466667	-8.38617	2.78972e-41	4.07e-39	--	PREDICTED: zinc finger BED domain-containing protein RICESLEEPER 2-like [Pyrus x bretschneideri]	-	-	-	-	-	-	-
Unigene0001328	12	13	8	412	566	399	0.4	0.4	0.32	11.8	17.82	11.13	0.373333	13.5833	5.18523	3.64874e-41	5.29848e-39	--	hypothetical protein PRUPE_ppa018488mg, partial [Prunus persica]	-	-	-	-	-	-	-
Unigene0015983	312	327	243	6	13	6	13.88	13.15	12.71	0.23	0.54	0.22	13.2467	0.33	-5.32702	5.06576e-41	7.32213e-39	ACP1	PREDICTED: acyl carrier protein 1, chloroplastic [Prunus mume]	-	-	-	-	-	GO:0003824//catalytic activity	GO:0044710//single-organism metabolic process
Unigene0000174	825	777	607	3034	2442	3215	3.35	2.85	2.9	10.48	9.28	10.82	3.03333	10.1933	1.74865	5.21841e-41	7.50801e-39	Os03g0733400	hypothetical protein PRUPE_ppa018860mg [Prunus persica]	-	-	-	-	-	-	-
Unigene0000231	386	429	326	51	39	64	7.78	7.82	7.72	0.87	0.74	1.07	7.77333	0.893333	-3.12126	6.93411e-41	9.93073e-39	--	PREDICTED: cytosolic purine 5'-nucleotidase-like [Prunus mume]	-	-	-	-	-	-	-
Unigene0028631	19541	22460	17658	4550	5549	5330	193.36	200.86	205.36	38.28	51.34	43.69	199.86	44.4367	-2.16917	7.21432e-41	1.02849e-38	UGT91C1	PREDICTED: soyasaponin III rhamnosyltransferase-like [Malus domestica]	-	-	-	-	-	-	-
Unigene0024361	153	125	105	1022	954	913	2.54	1.88	2.05	14.45	14.83	12.58	2.15667	13.9533	2.69373	7.27514e-41	1.03244e-38	PDC2	PREDICTED: pyruvate decarboxylase 1-like [Prunus mume]	Metabolism;Metabolism;Metabolism	Global and overview maps;Global and overview maps;Carbohydrate metabolism	ko01100//Metabolic pathways;ko01110//Biosynthesis of secondary metabolites;ko00010//Glycolysis / Gluconeogenesis	K01568;K01568;K01568	-	GO:0016830//carbon-carbon lyase activity;GO:0019842//vitamin binding	-
Unigene0030969	128	130	157	1320	1596	1452	2	1.83	2.88	17.51	23.27	18.76	2.23667	19.8467	3.14947	7.62583e-41	1.07731e-38	RPL18	PREDICTED: 60S ribosomal protein L18-2-like, partial [Populus euphratica]	Genetic Information Processing	Translation	ko03010//Ribosome	K02883	-	-	-
Unigene0033354	566	631	338	38	48	37	6.79	6.84	4.77	0.39	0.54	0.37	6.13333	0.433333	-3.82312	1.03821e-40	1.46009e-38	LRK10	PREDICTED: rust resistance kinase Lr10-like isoform X2 [Prunus mume]	-	-	-	-	-	-	-
Unigene0017029	2107	2290	1877	170	104	293	32.31	31.74	33.83	2.22	1.49	3.72	32.6267	2.47667	-3.71958	1.14617e-40	1.60469e-38	LAR	PREDICTED: leucoanthocyanidin reductase-like [Prunus mume]	Metabolism;Metabolism	Global and overview maps;Biosynthesis of other secondary metabolites	ko01110//Biosynthesis of secondary metabolites;ko00941//Flavonoid biosynthesis	K13081;K13081	-	-	-
Unigene0000055	425	644	424	44	23	54	9.16	12.54	10.74	0.81	0.46	0.96	10.8133	0.743333	-3.86266	1.23405e-40	1.72002e-38	N	PREDICTED: TMV resistance protein N-like [Prunus mume]	-	-	-	-	-	-	-
Unigene0002794	272	295	255	14	8	6	3.7	3.62	4.07	0.16	0.1	0.07	3.79667	0.11	-5.10916	1.41071e-40	1.9575e-38	CYP93A3	PREDICTED: cytochrome P450 76M5-like [Prunus mume]	Metabolism	Global and overview maps	ko01100//Metabolic pathways	K00512	-	-	-
Unigene0008695	796	1047	704	188	116	143	5.18	6.16	5.38	1.04	0.71	0.77	5.57333	0.84	-2.73008	1.60415e-40	2.21607e-38	MAIN	PREDICTED: uncharacterized protein LOC103330039 [Prunus mume]	-	-	-	-	-	-	-
Unigene0032743	0	5	0	1079	1236	1015	0	0.04	0	7.96	10.02	7.29	0.0133333	8.42333	9.30321	1.71235e-40	2.35512e-38	CYP82A3	PREDICTED: cytochrome P450 CYP82D47-like [Prunus mume]	-	-	-	-	-	GO:0016491//oxidoreductase activity;GO:0046872//metal ion binding	-
Unigene0032466	1432	1130	930	7225	7299	6891	15.61	11.13	11.91	66.96	74.38	62.21	12.8833	67.85	2.39684	2.39071e-40	3.27371e-38	At5g18840	PREDICTED: sugar transporter ERD6-like 16 [Prunus mume]	-	-	-	-	GO:0031224//intrinsic component of membrane	GO:0016491//oxidoreductase activity;GO:0022857//transmembrane transporter activity	GO:0044763//single-organism cellular process;GO:0044765//single-organism transport
Unigene0008335	339	352	303	6	18	12	15.76	14.79	16.55	0.24	0.78	0.46	15.7	0.493333	-4.99206	3.81914e-40	5.20688e-38	MT4A	PREDICTED: metallothionein-like protein 4B [Prunus mume]	-	-	-	-	-	-	-
Unigene0026395	3540	4120	3119	1257	1273	1309	44.76	47.08	46.35	13.51	15.05	13.71	46.0633	14.09	-1.70895	5.93319e-40	8.05392e-38	--	Suppressor of disruption of TFIIS [Noccaea caerulescens]	Metabolism	Metabolism of cofactors and vitamins	ko00760//Nicotinate and nicotinamide metabolism	K18551	-	-	GO:0006812//cation transport
Unigene0028958	3385	3718	2267	649	736	795	45.35	45.02	35.7	7.39	9.22	8.82	42.0233	8.47667	-2.30962	7.7066e-40	1.04159e-37	CYP93A3	PREDICTED: cytochrome P450 93A3-like [Prunus mume]	-	-	-	-	-	GO:0016491//oxidoreductase activity;GO:0046906//tetrapyrrole binding;GO:0046914//transition metal ion binding	GO:0044710//single-organism metabolic process
Unigene0004282	251	348	243	8	12	17	3.09	3.87	3.52	0.08	0.14	0.17	3.49333	0.13	-4.74802	8.1293e-40	1.09399e-37	PHT1-4	PREDICTED: probable inorganic phosphate transporter 1-3 [Prunus mume]	-	-	-	-	GO:0031224//intrinsic component of membrane	GO:0005215//transporter activity	GO:0015698//inorganic anion transport;GO:0044763//single-organism cellular process
Unigene0007466	426	573	376	4	1	2	17.49	21.26	18.14	0.14	0.04	0.07	18.9633	0.0833333	-7.8301	8.84782e-40	1.18557e-37	GSTF9	PREDICTED: glutathione S-transferase F9-like [Prunus mume]	Metabolism	Metabolism of other amino acids	ko00480//Glutathione metabolism	K00799	-	-	-
Unigene0004614	156	182	97	1239	1624	1398	1.63	1.72	1.19	11	15.85	12.09	1.51333	12.98	3.10049	8.94971e-40	1.1941e-37	LRK10	PREDICTED: rust resistance kinase Lr10-like [Prunus mume]	-	-	-	-	-	GO:0004672//protein kinase activity;GO:0005488//binding	GO:0006796//phosphate-containing compound metabolic process
Unigene0009639	466	706	469	2760	2445	2684	6.41	8.78	7.58	32.28	31.44	30.57	7.59	31.43	2.04997	9.07926e-40	1.20623e-37	PAP3	PREDICTED: LOW QUALITY PROTEIN: purple acid phosphatase 3-like [Prunus mume]	Metabolism;Metabolism	Global and overview maps;Metabolism of cofactors and vitamins	ko01100//Metabolic pathways;ko00740//Riboflavin metabolism	K14379;K14379	-	GO:0003824//catalytic activity	GO:0006796//phosphate-containing compound metabolic process
Unigene0000135	119	148	99	923	631	1004	0.89	1	0.87	5.85	4.4	6.2	0.92	5.48333	2.57535	1.00158e-39	1.32502e-37	At4g03230	PREDICTED: receptor-like serine/threonine-protein kinase SD1-8 [Pyrus x bretschneideri]	-	-	-	-	-	-	-
Unigene0007826	31	33	34	549	628	470	0.47	0.45	0.6	7.01	8.82	5.85	0.506667	7.22667	3.83422	1.62198e-39	2.1367e-37	ATL54	PREDICTED: RING-H2 finger protein ATL54-like [Prunus mume]	-	-	-	-	-	-	-
Unigene0035173	7534	7088	5997	587	1022	780	416.85	354.45	389.99	27.62	52.87	35.75	387.097	38.7467	-3.32055	2.27209e-39	2.98054e-37	--	-	-	-	-	-	-	-	-
Unigene0026359	522	571	481	53	75	80	11.66	11.52	12.62	1.01	1.57	1.48	11.9333	1.35333	-3.14041	2.50435e-39	3.27147e-37	--	PREDICTED: uncharacterized protein LOC103343811 [Prunus mume]	-	-	-	-	-	-	-
Unigene0034530	938	1134	968	0	3	1	20.13	22	24.42	0	0.06	0.02	22.1833	0.0266667	-9.70022	2.90493e-39	3.77895e-37	--	hypothetical protein PRUPE_3G169800 [Prunus persica]	-	-	-	-	-	-	-
Unigene0021402	385	395	401	51	45	50	7.07	6.56	8.66	0.8	0.77	0.76	7.43	0.776667	-3.25799	2.94404e-39	3.81393e-37	NDL3	PREDICTED: pollen-specific protein SF21-like [Prunus mume]	-	-	-	-	-	-	-
Unigene0036833	26064	38376	23895	83	221	86	100.97	134.36	108.8	0.27	0.8	0.28	114.71	0.45	-7.99385	3.06606e-39	3.95559e-37	ORF1	RNA replication protein [Anthurium amnicola]	-	-	-	-	-	-	-
Unigene0010937	538	542	250	24	12	15	15.74	14.33	8.6	0.6	0.33	0.36	12.89	0.43	-4.90577	4.35274e-39	5.59246e-37	HSP22.0	PREDICTED: 16.9 kDa class I heat shock protein 1-like isoform X2 [Prunus mume]	Genetic Information Processing	Folding, sorting and degradation	ko04141//Protein processing in endoplasmic reticulum	K13993	-	-	-
Unigene0030775	768	821	689	135	119	91	15.14	14.62	15.96	2.26	2.19	1.49	15.24	1.98	-2.94429	4.64151e-39	5.93904e-37	--	hypothetical protein PRUPE_ppa023891mg [Prunus persica]	-	-	-	-	-	-	-
Unigene0003028	1158	997	961	0	4	0	30.68	23.88	29.93	0	0.1	0	28.1633	0.0333333	-9.72264	5.04203e-39	6.42519e-37	PP2A1	PREDICTED: protein PHLOEM PROTEIN 2-LIKE A1-like [Prunus mume]	-	-	-	-	-	-	-
Unigene0001628	3897	4736	3447	1587	1450	1861	39.75	43.66	41.32	13.76	13.83	15.72	41.5767	14.4367	-1.52604	5.26921e-39	6.6874e-37	4CL3	PREDICTED: 4-coumarate--CoA ligase 2 [Prunus mume]	Metabolism;Metabolism;Metabolism;Metabolism;Metabolism	Global and overview maps;Global and overview maps;Biosynthesis of other secondary metabolites;Amino acid metabolism;Metabolism of cofactors and vitamins	ko01100//Metabolic pathways;ko01110//Biosynthesis of secondary metabolites;ko00940//Phenylpropanoid biosynthesis;ko00360//Phenylalanine metabolism;ko00130//Ubiquinone and other terpenoid-quinone biosynthesis	K01904;K01904;K01904;K01904;K01904	-	GO:0016405//CoA-ligase activity;GO:0016703//oxidoreductase activity, acting on single donors with incorporation of molecular oxygen, incorporation of one atom of oxygen (internal monooxygenases or internal mixed function oxidases);GO:0032550//purine ribonucleoside binding	GO:0006725//cellular aromatic compound metabolic process;GO:0009411//response to UV;GO:0009813//flavonoid biosynthetic process;GO:0010208//pollen wall assembly;GO:0034285//response to disaccharide;GO:0044710//single-organism metabolic process
Unigene0000154	151	199	108	1013	1033	1028	3.39	4.04	2.85	19.34	21.69	19.12	3.42667	20.05	2.54872	6.04395e-39	7.6396e-37	--	PREDICTED: disease resistance-like protein CSA1 isoform X2 [Prunus mume]	-	-	-	-	-	-	-
Unigene0027443	378	517	360	62	62	68	2.63	3.25	2.94	0.37	0.4	0.39	2.94	0.386667	-2.92665	7.45513e-39	9.38535e-37	FRL4A	PREDICTED: restin homolog isoform X1 [Prunus mume]	-	-	-	-	-	-	-
Unigene0000495	11	24	7	672	345	539	0.17	0.34	0.13	8.86	5	6.92	0.213333	6.92667	5.02098	1.02823e-38	1.28925e-36	--	CHD3-type chromatin-remodeling factor PICKLE [Morus notabilis]	-	-	-	-	-	-	-
Unigene0028836	30097	31156	28475	10383	9401	9245	292.59	273.75	325.36	85.83	85.45	74.45	297.233	81.91	-1.85948	1.0328e-38	1.2898e-36	SEOB	PREDICTED: protein SIEVE ELEMENT OCCLUSION B-like [Prunus mume]	-	-	-	-	-	-	-
Unigene0003267	42	47	16	592	494	558	0.9	0.91	0.4	10.81	9.92	9.93	0.736667	10.22	3.79424	1.54529e-38	1.92213e-36	ACA1	PREDICTED: alpha carbonic anhydrase 1, chloroplastic [Prunus mume]	Metabolism	Energy metabolism	ko00910//Nitrogen metabolism	K01674	-	GO:0046872//metal ion binding	-
Unigene0012677	30	9	22	984	1113	695	1.93	0.52	1.67	53.93	67.07	37.1	1.37333	52.7	5.26205	1.80266e-38	2.23336e-36	--	PREDICTED: uncharacterized transmembrane protein DDB_G0289901-like [Prunus mume]	-	-	-	-	-	-	-
Unigene0024752	2268	2984	1887	355	266	541	31.54	37.5	30.84	4.2	3.46	6.23	33.2933	4.63	-2.84615	3.14408e-38	3.8799e-36	CYP71D11	PREDICTED: cytochrome P450 71D9-like [Prunus mume]	-	-	-	-	-	-	-
Unigene0026706	82	90	69	588	563	552	0.66	0.65	0.65	4.01	4.22	3.66	0.653333	3.96333	2.60082	3.74616e-38	4.60468e-36	MRS2-2	PREDICTED: LOW QUALITY PROTEIN: magnesium transporter MRS2-2-like [Prunus mume]	-	-	-	-	-	-	GO:0030001//metal ion transport
Unigene0006981	3107	3605	2442	631	302	551	39.64	41.57	36.62	6.85	3.6	5.82	39.2767	5.42333	-2.85642	3.94595e-38	4.83123e-36	TAR3	PREDICTED: tryptophan aminotransferase-related protein 4-like [Prunus mume]	-	-	-	-	-	-	-
Unigene0031279	1	3	0	1104	1263	1348	0.02	0.04	0	14.34	18.04	17.06	0.02	16.48	9.6865	4.29122e-38	5.23344e-36	--	PREDICTED: leucine-rich repeat receptor-like protein kinase PXL2 [Prunus mume]	-	-	-	-	-	-	-
Unigene0020901	0	6	1	656	429	670	0	0.1	0.02	10.65	7.66	10.6	0.04	9.63667	7.91239	4.34695e-38	5.28078e-36	AIL1	aintegumenta, partial [Sonneratia alba]	-	-	-	-	-	-	-
Unigene0027139	2676	2179	2213	472	506	589	23.79	17.51	23.13	3.57	4.21	4.34	21.4767	4.04	-2.41034	4.39533e-38	5.31887e-36	--	PREDICTED: putative UPF0481 protein At3g02645 isoform X2 [Prunus mume]	-	-	-	-	-	-	-
Unigene0000361	1684	1589	1353	182	273	222	12.26	10.46	11.58	1.13	1.86	1.34	11.4333	1.44333	-2.98577	5.37055e-38	6.4739e-36	--	Spt20 domain-containing protein [Cephalotus follicularis]	-	-	-	-	-	-	-
Unigene0011614	14	10	12	479	601	364	0.41	0.26	0.41	11.83	16.32	8.76	0.36	12.3033	5.09491	6.5529e-38	7.86877e-36	--	hypothetical protein PRUPE_8G073200 [Prunus persica]	-	-	-	-	-	-	-
Unigene0031231	106	117	82	677	705	673	0.76	0.76	0.69	4.13	4.73	4	0.736667	4.28667	2.54077	7.08257e-38	8.47222e-36	STK38L	PREDICTED: serine/threonine-protein kinase tricorner-like [Prunus mume]	-	-	-	-	-	GO:0004672//protein kinase activity;GO:0032550//purine ribonucleoside binding	GO:0006464//cellular protein modification process;GO:0006796//phosphate-containing compound metabolic process
Unigene0013513	6717	6607	5754	0	0	0	134.72	119.76	135.64	0	0	0	130.04	0.001	-16.9886	7.11504e-38	8.47858e-36	--	PREDICTED: glutelin type-A 2-like [Prunus mume]	-	-	-	-	-	-	-
Unigene0000578	104	86	109	891	844	871	1	0.75	1.23	7.29	7.6	6.95	0.993333	7.28	2.87359	7.89127e-38	9.36781e-36	Os03g0733400	PREDICTED: zinc finger BED domain-containing protein RICESLEEPER 2-like isoform X2 [Phoenix dactylifera]	-	-	-	-	-	GO:0005488//binding	-
Unigene0008026	261	259	273	10	10	6	1.87	1.67	2.3	0.06	0.07	0.04	1.94667	0.0566667	-5.10236	8.29429e-38	9.80894e-36	RPM1	PREDICTED: disease resistance protein RPM1-like [Prunus mume]	Organismal Systems	Environmental adaptation	ko04626//Plant-pathogen interaction	K13457	-	-	-
Unigene0026549	290	461	310	31	22	38	1.04	1.49	1.3	0.09	0.07	0.11	1.27667	0.09	-3.82631	8.4859e-38	9.99767e-36	AtMg01250	reverse transcriptase [Corchorus capsularis]	-	-	-	-	-	-	-
Unigene0029078	0	1	4	1114	613	1068	0	0.02	0.13	25.5	15.43	23.81	0.05	21.58	8.75355	9.5684e-38	1.12306e-35	--	PREDICTED: uncharacterized protein LOC103342553 [Prunus mume]	-	-	-	-	-	-	-
Unigene0034767	715	813	460	0	3	2	4.22	4.34	3.19	0	0.02	0.01	3.91667	0.01	-8.61348	9.8233e-38	1.14796e-35	N	PREDICTED: TMV resistance protein N-like isoform X1 [Prunus mume]	-	-	-	-	-	-	-
Unigene0031826	2190	2578	1875	956	853	991	23.21	24.69	23.36	8.62	8.45	8.7	23.7533	8.59	-1.4674	9.85402e-38	1.14796e-35	At2g19130	PREDICTED: G-type lectin S-receptor-like serine/threonine-protein kinase At2g19130 [Pyrus x bretschneideri]	-	-	-	-	GO:0031224//intrinsic component of membrane	GO:0004672//protein kinase activity;GO:0005515//protein binding;GO:0032550//purine ribonucleoside binding	GO:0006464//cellular protein modification process;GO:0006796//phosphate-containing compound metabolic process;GO:0008037//cell recognition
Unigene0032239	16	29	22	397	602	546	0.93	1.53	1.51	19.68	32.82	26.37	1.32333	26.29	4.31227	9.99949e-38	1.16057e-35	--	-	-	-	-	-	-	-	-
Unigene0009437	3	5	12	513	1189	793	0.03	0.04	0.12	3.8	9.67	5.71	0.0633333	6.39333	6.65746	1.12366e-37	1.29933e-35	--	PREDICTED: uncharacterized protein LOC103339457 [Prunus mume]	-	-	-	-	-	-	-
Unigene0023460	15730	20073	14271	6822	5096	7229	87.28	100.66	93.07	32.19	26.44	33.22	93.67	30.6167	-1.61327	1.52899e-37	1.7615e-35	CAMTA5	PREDICTED: calmodulin-binding transcription activator 5-like isoform X1 [Prunus mume]	-	-	-	-	-	-	-
Unigene0007316	273	471	309	27	20	17	7.32	11.42	9.74	0.62	0.5	0.38	9.49333	0.5	-4.24691	2.14458e-37	2.46161e-35	--	PREDICTED: microtubule-associated serine/threonine-protein kinase 3 [Prunus mume]	-	-	-	-	-	-	-
Unigene0004210	676	847	598	2363	2230	2688	4.79	5.43	4.99	14.25	14.79	15.79	5.07	14.9433	1.55944	2.85312e-37	3.26291e-35	At1g67190	PREDICTED: F-box/LRR-repeat protein At1g67190-like [Prunus mume]	-	-	-	-	-	-	-
Unigene0018283	1188	1313	1047	329	200	322	9.5	9.49	9.84	2.24	1.5	2.13	9.61	1.95667	-2.29614	3.3519e-37	3.81933e-35	PAE5	PREDICTED: pectin acetylesterase 5-like [Prunus mume]	-	-	-	-	-	-	-
Unigene0000620	2117	2458	1929	6199	5754	6629	17.86	18.74	19.13	44.46	45.38	46.32	18.5767	45.3867	1.28878	3.8203e-37	4.33723e-35	EOGT	DUF563 domain-containing protein [Cephalotus follicularis]	-	-	-	-	-	GO:0016740//transferase activity	-
Unigene0000258	253	245	219	7	9	5	10.47	9.17	10.66	0.25	0.35	0.17	10.1	0.256667	-5.29832	4.23323e-37	4.78861e-35	N	PREDICTED: disease resistance protein RML1A-like [Prunus mume]	-	-	-	-	-	-	-
Unigene0030646	30423	33760	26499	186041	209587	154031	576.25	577.94	589.94	2996.39	3711.58	2416.63	581.377	3041.53	2.38725	4.24888e-37	4.78897e-35	PRUA1	PREDICTED: major allergen Pru ar 1 [Prunus mume]	-	-	-	-	-	-	-
Unigene0034525	11485	12528	9649	3616	3955	4431	166.6	164.24	164.51	44.6	53.64	53.24	165.117	50.4933	-1.70932	4.79885e-37	5.38939e-35	ZIP3	PREDICTED: zinc transporter 8-like [Prunus mume]	-	-	-	-	GO:0031224//intrinsic component of membrane	GO:0016628//oxidoreductase activity, acting on the CH-CH group of donors, NAD or NADP as acceptor;GO:0022890//inorganic cation transmembrane transporter activity	GO:0006829//zinc II ion transport;GO:0044710//single-organism metabolic process;GO:0044763//single-organism cellular process
Unigene0000169	40359	37023	30918	176038	139788	142444	872.57	723.43	785.67	3236.28	2825.62	2550.92	793.89	2870.94	1.85451	7.26878e-37	8.134e-35	--	extensin [Prunus dulcis]	-	-	-	-	-	-	-
Unigene0030828	385	293	256	4	5	2	13.23	9.1	10.34	0.12	0.16	0.06	10.89	0.113333	-6.58629	1.08233e-36	1.20684e-34	--	Maternal effect embryo arrest 18 [Theobroma cacao]	-	-	-	-	-	-	-
Unigene0016514	2338	2625	1793	8350	8023	7926	11.63	11.8	10.48	35.32	37.31	32.66	11.3033	35.0967	1.63459	1.86925e-36	2.07687e-34	AtMg00310	reverse transcriptase [Corchorus capsularis]	-	-	-	-	-	-	-
Unigene0009438	494	386	392	1	10	1	6.35	4.48	5.92	0.01	0.12	0.01	5.58333	0.0466667	-6.90259	2.24535e-36	2.48589e-34	At3g47200	PREDICTED: UPF0481 protein At3g47200-like [Pyrus x bretschneideri]	-	-	-	-	-	-	-
Unigene0015492	215	321	235	16	16	15	2.58	3.48	3.31	0.16	0.18	0.15	3.12333	0.163333	-4.2572	2.5486e-36	2.81166e-34	ABCG5	PREDICTED: ABC transporter G family member 5 [Prunus mume]	-	-	-	-	GO:0031224//intrinsic component of membrane	GO:0017111//nucleoside-triphosphatase activity;GO:0032550//purine ribonucleoside binding	GO:0009886//post-embryonic morphogenesis;GO:0051234//establishment of localization
Unigene0031486	1440	1792	1128	0	0	3	16.99	19.11	15.64	0	0	0.03	17.2467	0.01	-10.7521	4.71401e-36	5.18225e-34	At4g13780	PREDICTED: probable methionine--tRNA ligase [Prunus mume]	-	-	-	-	-	-	-
Unigene0019494	191	122	178	2076	1389	2512	8.83	5.1	9.67	81.58	60.02	96.16	7.86667	79.2533	3.33265	6.81216e-36	7.46255e-34	--	PREDICTED: protein SRC1-like [Prunus mume]	-	-	-	-	-	-	-
Unigene0022736	10	10	8	1541	305	1658	0.79	0.72	0.74	103.81	22.59	108.8	0.75	78.4	6.70782	1.11052e-35	1.21229e-33	--	-	-	-	-	-	-	-	-
Unigene0033713	304	311	272	1912	2484	3759	2.56	2.37	2.69	13.7	19.56	26.23	2.54	19.83	2.96478	1.4033e-35	1.52656e-33	LRK10	PREDICTED: LEAF RUST 10 DISEASE-RESISTANCE LOCUS RECEPTOR-LIKE PROTEIN KINASE-like 2.4 [Prunus mume]	-	-	-	-	-	-	-
Unigene0005308	1273	1484	1156	0	2	1	22.11	23.3	23.6	0	0.03	0.01	23.0033	0.0133333	-10.7526	1.8335e-35	1.98763e-33	--	hypothetical protein PRUPE_6G108900 [Prunus persica]	-	-	-	-	-	-	-
Unigene0035284	115	83	74	733	875	1122	1.25	0.82	0.95	6.8	8.92	10.13	1.00667	8.61667	3.09754	2.01125e-35	2.17277e-33	ICL	isocitrate lyase [Prunus sibirica]	Metabolism;Metabolism;Metabolism;Metabolism	Global and overview maps;Global and overview maps;Global and overview maps;Carbohydrate metabolism	ko01100//Metabolic pathways;ko01110//Biosynthesis of secondary metabolites;ko01200//Carbon metabolism;ko00630//Glyoxylate and dicarboxylate metabolism	K01637;K01637;K01637;K01637	GO:0005777//peroxisome	GO:0016833//oxo-acid-lyase activity	GO:0003006//developmental process involved in reproduction;GO:0006101//citrate metabolic process;GO:0044262//cellular carbohydrate metabolic process
Unigene0027587	3251	2882	2359	2	14	4	34.92	27.98	29.78	0.02	0.14	0.04	30.8933	0.0666667	-8.85611	2.12568e-35	2.28848e-33	--	PREDICTED: RPW8-like protein 3 [Fragaria vesca subsp. vesca] [Fragaria vesca]	-	-	-	-	-	-	-
Unigene0030656	10	11	7	326	397	286	0.13	0.13	0.1	3.49	4.68	2.99	0.12	3.72	4.9542	5.26088e-35	5.64433e-33	At5g66900	PREDICTED: probable disease resistance protein At5g66900 [Prunus mume]	-	-	-	-	-	-	-
Unigene0023437	372	428	353	2	2	2	3.22	3.35	3.6	0.01	0.02	0.01	3.39	0.0133333	-7.9901	5.36612e-35	5.73752e-33	At3g47570	PREDICTED: probable LRR receptor-like serine/threonine-protein kinase At3g47570 [Prunus mume]	-	-	-	-	-	-	-
Unigene0031822	249	290	276	20	10	23	4.53	4.77	5.9	0.31	0.17	0.35	5.06667	0.276667	-4.19482	6.50177e-35	6.92804e-33	--	PREDICTED: disease resistance protein RGA2-like [Prunus mume]	-	-	-	-	-	-	-
Unigene0026474	270	251	212	1555	1887	1531	9.07	7.62	8.37	44.41	59.26	42.59	8.35333	48.7533	2.54508	6.57439e-35	6.9816e-33	--	-	-	-	-	-	-	-	-
Unigene0009292	3	4	3	389	254	434	0.15	0.19	0.18	17.07	12.26	18.56	0.173333	15.9633	6.52507	7.21263e-35	7.6334e-33	--	PREDICTED: TMV resistance protein N-like [Prunus mume]	-	-	-	-	-	-	-
Unigene0029456	5496	5602	4801	2419	2136	2596	67.7	62.36	69.51	25.34	24.6	26.49	66.5233	25.4767	-1.38468	7.28608e-35	7.6851e-33	Gyg1	Glyco_transf_8 domain-containing protein [Cephalotus follicularis]	-	-	-	-	-	GO:0016740//transferase activity	-
Unigene0029610	727	718	590	181	137	205	7.83	6.99	7.47	1.66	1.38	1.83	7.43	1.62333	-2.1944	1.00602e-34	1.05754e-32	--	PREDICTED: ankyrin repeat-containing protein At5g02620-like [Malus domestica]	-	-	-	-	-	-	-
Unigene0019265	121	290	207	2207	2582	2699	1.99	4.3	4	30.82	39.65	36.72	3.43	35.73	3.38086	1.34023e-34	1.40414e-32	F6'H2	PREDICTED: feruloyl CoA ortho-hydroxylase 1-like [Prunus mume]	Metabolism;Metabolism	Global and overview maps;Biosynthesis of other secondary metabolites	ko01110//Biosynthesis of secondary metabolites;ko00940//Phenylpropanoid biosynthesis	K06892;K06892	-	GO:0016705//oxidoreductase activity, acting on paired donors, with incorporation or reduction of molecular oxygen;GO:0043169//cation binding	GO:0044710//single-organism metabolic process
Unigene0006442	7792	8525	6103	2291	1508	2618	69.44	68.66	63.92	17.36	12.56	19.32	67.34	16.4133	-2.0366	1.56441e-34	1.63353e-32	CSLE6	PREDICTED: cellulose synthase-like protein E6 [Prunus mume]	-	-	-	-	GO:0031224//intrinsic component of membrane	GO:0016759//cellulose synthase activity	GO:0030243//cellulose metabolic process
Unigene0026938	30	81	26	824	902	895	0.4	0.97	0.41	9.31	11.21	9.85	0.593333	10.1233	4.0927	1.57621e-34	1.64036e-32	UGT85A23	PREDICTED: 7-deoxyloganetin glucosyltransferase-like [Prunus mume]	Metabolism;Metabolism	Global and overview maps;Global and overview maps	ko01100//Metabolic pathways;ko01110//Biosynthesis of secondary metabolites	K21374;K21374	-	-	-
Unigene0000611	260	241	236	1128	1017	1235	1.52	1.28	1.62	5.62	5.57	5.99	1.47333	5.72667	1.95861	1.69582e-34	1.75898e-32	--	PREDICTED: TMV resistance protein N-like [Prunus mume]	-	-	-	-	-	-	-
Unigene0007626	255	269	190	1143	910	1031	3.24	3.09	2.84	12.35	10.82	10.86	3.05667	11.3433	1.89181	2.4242e-34	2.50616e-32	NPF5.6	PREDICTED: protein NRT1/ PTR FAMILY 5.6 [Prunus mume]	-	-	-	-	GO:0031224//intrinsic component of membrane	-	GO:0015833//peptide transport
Unigene0033171	4114	4382	3420	1532	1547	1589	44.84	43.16	43.81	14.2	15.76	14.35	43.9367	14.77	-1.57276	2.51153e-34	2.58787e-32	UGT87A1	PREDICTED: UDP-glycosyltransferase 87A1-like [Prunus mume]	-	-	-	-	-	GO:0016757//transferase activity, transferring glycosyl groups	-
Unigene0018255	37710	51453	35007	9776	11938	11438	470.58	580.3	513.45	103.73	139.28	118.23	521.443	120.413	-2.11452	2.93281e-34	3.01202e-32	AAE3	PREDICTED: LOW QUALITY PROTEIN: oxalate--CoA ligase-like [Prunus mume]	Metabolism;Metabolism	Global and overview maps;Carbohydrate metabolism	ko01100//Metabolic pathways;ko00630//Glyoxylate and dicarboxylate metabolism	K22133;K22133	-	-	-
Unigene0030640	7319	9193	7123	3388	2435	3303	79.73	90.51	91.21	31.38	24.8	29.81	87.15	28.6633	-1.60429	4.87552e-34	4.99078e-32	--	PREDICTED: protein NUCLEAR FUSION DEFECTIVE 4 [Prunus mume]	-	-	-	-	-	-	GO:0044763//single-organism cellular process
Unigene0003181	45	63	47	499	551	467	0.52	0.66	0.64	4.91	5.97	4.48	0.606667	5.12	3.07717	5.68575e-34	5.80114e-32	--	PREDICTED: B3 domain-containing protein LOC_Os12g40080-like isoform X1 [Fragaria vesca subsp. vesca] [Fragaria vesca]	-	-	-	-	-	-	-
Unigene0025668	90	48	34	1076	697	1087	1.28	0.62	0.57	13.03	9.28	12.83	0.823333	11.7133	3.83053	5.95592e-34	6.05699e-32	At4g17486	Zinc finger family protein [Theobroma cacao]	-	-	-	-	-	-	-
Unigene0018367	4	53	16	21146	15332	20101	0.06	0.67	0.26	251.19	200.26	232.6	0.33	228.017	9.43246	6.59253e-34	6.68265e-32	CYP71A25	PREDICTED: cytochrome P450 71A25-like [Prunus mume]	-	-	-	-	-	-	-
Unigene0029212	7	6	15	372	263	407	0.09	0.07	0.23	4.21	3.28	4.49	0.13	3.99333	4.94101	7.07537e-34	7.14887e-32	CBL10	PREDICTED: calcineurin B-like protein 10 isoform X1 [Prunus mume]	-	-	-	-	-	-	-
Unigene0003809	12	11	25	400	409	509	0.17	0.14	0.43	4.95	5.57	6.14	0.246667	5.55333	4.49272	7.65384e-34	7.7084e-32	TP53I3	PREDICTED: quinone oxidoreductase PIG3-like [Prunus mume]	-	-	-	-	-	GO:0003824//catalytic activity	GO:0044710//single-organism metabolic process
Unigene0034259	50	65	54	436	438	452	1.53	1.8	1.95	11.38	12.57	11.49	1.76	11.8133	2.74677	7.93122e-34	7.96207e-32	--	DUF4228 domain-containing protein [Cephalotus follicularis]	-	-	-	-	-	-	-
Unigene0010986	781	976	716	223	231	266	8.65	9.77	9.32	2.1	2.39	2.44	9.24667	2.31	-2.00104	9.15387e-34	9.16003e-32	TKPR1	PREDICTED: tetraketide alpha-pyrone reductase 1-like isoform X1 [Prunus mume]	-	-	-	-	-	-	-
Unigene0025835	59	73	84	797	877	714	1.08	1.21	1.81	12.42	15.03	10.84	1.36667	12.7633	3.22327	9.45514e-34	9.43127e-32	At1g06620	PREDICTED: 1-aminocyclopropane-1-carboxylate oxidase homolog 1-like [Malus domestica]	-	-	-	-	-	GO:0016705//oxidoreductase activity, acting on paired donors, with incorporation or reduction of molecular oxygen;GO:0043169//cation binding	GO:0044710//single-organism metabolic process
Unigene0023872	6	13	16	309	270	348	0.11	0.22	0.35	4.88	4.68	5.35	0.226667	4.97	4.4546	9.63961e-34	9.58465e-32	--	hypothetical protein PRUPE_1G225300 [Prunus persica]	-	-	-	-	-	GO:0043168//anion binding	-
Unigene0028346	1284	1107	968	5279	3812	4872	7.91	6.17	7.01	27.67	21.97	24.87	7.03	24.8367	1.82087	1.46449e-33	1.45152e-31	RE1	PREDICTED: uncharacterized protein LOC107880362 [Prunus mume]	-	-	-	-	-	-	-
Unigene0030288	285	305	213	6	1	2	0.8	0.77	0.7	0.01	0	0	0.756667	0.00333333	-7.82655	1.85288e-33	1.83066e-31	--	PREDICTED: protein NYNRIN-like [Prunus mume]	-	-	-	-	-	-	-
Unigene0008408	239	285	183	1433	937	1258	5.09	5.49	4.58	25.97	18.67	22.21	5.05333	22.2833	2.14066	2.08203e-33	2.05057e-31	ARP1	PREDICTED: probable RNA-binding protein ARP1 [Prunus mume]	-	-	-	-	GO:0043231//intracellular membrane-bounded organelle	GO:0097159//organic cyclic compound binding	GO:0000377//RNA splicing, via transesterification reactions with bulged adenosine as nucleophile;GO:0006970//response to osmotic stress;GO:0009845//seed germination
Unigene0028280	96	79	53	595	689	709	2.4	1.78	1.56	12.63	16.09	14.66	1.91333	14.46	2.91791	2.09445e-33	2.05631e-31	MIZ1	PREDICTED: protein MIZU-KUSSEI 1 [Prunus mume]	-	-	-	-	-	-	-
Unigene0036158	41	53	40	390	517	570	0.57	0.67	0.66	4.64	6.76	6.6	0.633333	6	3.24393	2.15452e-33	2.10866e-31	7OMT	PREDICTED: (R,S)-reticuline 7-O-methyltransferase-like [Prunus mume]	-	-	-	-	-	-	-
Unigene0024944	1129	1314	1032	441	322	381	12.67	13.33	13.61	4.21	3.38	3.54	13.2033	3.71	-1.83141	3.18928e-33	3.11164e-31	DRP1E	PREDICTED: dynamin-related protein 1E-like [Prunus mume]	-	-	-	-	-	GO:0017111//nucleoside-triphosphatase activity;GO:0032550//purine ribonucleoside binding	-
Unigene0000158	4	2	1	472	666	426	0.19	0.09	0.06	19.45	30.18	17.1	0.113333	22.2433	7.61666	3.32391e-33	3.23289e-31	--	PREDICTED: probable disease resistance protein RPP1 isoform X1 [Prunus mume]	-	-	-	-	-	-	-
Unigene0004752	4	0	3	367	369	432	0.12	0	0.11	9.59	10.6	11	0.0766667	10.3967	7.08331	3.37705e-33	3.27437e-31	APS1	PREDICTED: acid phosphatase 1-like [Prunus mume]	-	-	-	-	-	GO:0003824//catalytic activity	GO:0006796//phosphate-containing compound metabolic process
Unigene0032756	401	484	416	69	44	84	3.89	4.24	4.74	0.57	0.4	0.67	4.29	0.546667	-2.97224	5.32223e-33	5.14444e-31	--	PREDICTED: protein rolling stone-like, partial [Juglans regia]	-	-	-	-	-	-	-
Unigene0000255	1	1	2	909	626	786	0.01	0.01	0.02	6.35	4.8	5.34	0.0133333	5.49667	8.68738	5.52917e-33	5.32797e-31	--	PREDICTED: V-type proton ATPase subunit a1-like [Prunus mume]	Metabolism;Metabolism;Cellular Processes	Global and overview maps;Energy metabolism;Transport and catabolism	ko01100//Metabolic pathways;ko00190//Oxidative phosphorylation;ko04145//Phagosome	K02154;K02154;K02154	-	-	-
Unigene0017303	3889	3346	2575	827	882	833	57.14	44.43	44.47	10.33	12.12	10.14	48.68	10.8633	-2.16386	6.21828e-33	5.97356e-31	MGL	PREDICTED: methionine gamma-lyase [Prunus mume]	Metabolism;Metabolism	Amino acid metabolism;Metabolism of other amino acids	ko00270//Cysteine and methionine metabolism;ko00450//Selenocompound metabolism	K01761;K01761	GO:0044444//cytoplasmic part	GO:0016765//transferase activity, transferring alkyl or aryl (other than methyl) groups;GO:0016846//carbon-sulfur lyase activity;GO:0043168//anion binding	GO:0009087//methionine catabolic process;GO:0051260//protein homooligomerization
Unigene0030529	48	62	34	490	336	458	0.62	0.73	0.52	5.41	4.08	4.92	0.623333	4.80333	2.94596	8.78185e-33	8.41037e-31	FLA14	PREDICTED: fasciclin-like arabinogalactan protein 14 [Prunus mume]	-	-	-	-	-	-	-
Unigene0019182	760	1382	863	6982	9801	8035	5.99	9.84	7.99	46.76	72.17	52.42	7.94	57.1167	2.8467	1.54988e-32	1.47978e-30	ZMYM1	zinc finger MYM-type protein 1-like [Asparagus officinalis]	-	-	-	-	-	-	-
Unigene0026577	441	441	349	4973	2116	4493	1.26	1.14	1.18	12.13	5.67	10.67	1.19333	9.49	2.99141	2.06616e-32	1.96669e-30	--	PREDICTED: uncharacterized protein KIAA0754-like [Prunus mume]	-	-	-	-	-	-	-
Unigene0021460	668	708	565	2763	1983	2378	6.79	6.51	6.75	23.89	18.85	20.03	6.68333	20.9233	1.64647	2.14044e-32	2.03121e-30	--	PREDICTED: uncharacterized protein LOC103336452 isoform X1 [Prunus mume]	-	-	-	-	-	-	-
Unigene0034639	2	16	8	353	284	436	0.01	0.1	0.07	2.15	1.91	2.59	0.06	2.21667	5.20729	2.19722e-32	2.07877e-30	--	PREDICTED: uncharacterized protein LOC103953533 [Pyrus x bretschneideri]	-	-	-	-	-	-	-
Unigene0033349	14	16	14	370	666	391	0.26	0.27	0.31	5.91	11.7	6.09	0.28	7.9	4.81835	2.43359e-32	2.29544e-30	--	hypothetical protein PRUPE_ppb018185mg [Prunus persica]	-	-	-	-	-	-	-
Unigene0014903	276	300	276	14	26	16	22.31	21.92	26.22	0.96	1.97	1.07	23.4833	1.33333	-4.13853	2.6401e-32	2.48273e-30	--	hypothetical protein PRUPE_4G039200 [Prunus persica]	-	-	-	-	-	-	-
Unigene0005728	949	1090	972	228	262	246	19.82	20.57	23.86	4.05	5.12	4.25	21.4167	4.47333	-2.25931	2.84704e-32	2.66929e-30	CXE5	PREDICTED: probable carboxylesterase 12 [Prunus mume]	-	-	-	-	-	GO:0003824//catalytic activity	-
Unigene0026634	251	253	164	1351	1367	1178	2.65	2.41	2.03	12.13	13.49	10.3	2.36333	11.9733	2.34093	2.932e-32	2.74072e-30	--	Ist1 domain-containing protein [Cephalotus follicularis]	Cellular Processes	Transport and catabolism	ko04144//Endocytosis	K19476	-	-	-
Unigene0029799	0	4	0	1377	550	1231	0	0.04	0	11.36	4.99	9.89	0.0133333	8.74667	9.35755	4.28815e-32	3.99642e-30	--	CHD3-type chromatin-remodeling factor PICKLE [Morus notabilis]	-	-	-	-	-	-	-
Unigene0028632	457	550	436	2513	3341	2750	6.68	7.26	7.49	31.22	45.64	33.28	7.14333	36.7133	2.36163	5.07185e-32	4.71274e-30	GmSGT3	PREDICTED: soyasaponin III rhamnosyltransferase-like [Prunus mume]	-	-	-	-	-	-	-
Unigene0025769	234	175	194	1519	2192	1821	5.94	4.02	5.79	32.8	52.05	38.31	5.25	41.0533	2.96711	5.46156e-32	5.0598e-30	--	-	-	-	-	-	-	-	-
Unigene0004353	5214	6168	3699	1742	1584	1597	71.13	76.05	59.31	20.21	20.2	18.05	68.83	19.4867	-1.82055	5.7422e-32	5.30406e-30	WAT1	PREDICTED: protein WALLS ARE THIN 1 [Prunus mume]	-	-	-	-	GO:0031224//intrinsic component of membrane	GO:0005215//transporter activity	GO:0044763//single-organism cellular process
Unigene0008830	2764	3875	2485	205	422	282	37.43	47.43	39.55	2.36	5.34	3.16	41.47	3.62	-3.51801	6.61053e-32	6.08812e-30	AMT1-2	PREDICTED: LOW QUALITY PROTEIN: ammonium transporter 1 member 2 [Prunus mume]	-	-	-	-	-	-	-
Unigene0010578	1	2	0	1270	1005	1217	0.01	0.02	0	10.29	8.95	9.6	0.01	9.61333	9.90889	7.31447e-32	6.71662e-30	IOS1	PREDICTED: probable LRR receptor-like serine/threonine-protein kinase At1g05700 [Prunus mume]	-	-	-	-	-	-	-
Unigene0004222	393	332	293	37	13	26	2.98	2.27	2.61	0.24	0.09	0.16	2.62	0.163333	-4.00368	7.76475e-32	7.10919e-30	RPP13	PREDICTED: disease resistance protein RPM1-like [Prunus mume]	Organismal Systems	Environmental adaptation	ko04626//Plant-pathogen interaction	K13457	-	-	-
Unigene0028356	166	163	142	743	777	816	2.44	2.17	2.46	9.29	10.69	9.94	2.35667	9.97333	2.08133	9.65312e-32	8.81228e-30	At1g09620	PREDICTED: LOW QUALITY PROTEIN: leucine--tRNA ligase, cytoplasmic-like [Prunus mume]	Genetic Information Processing	Translation	ko00970//Aminoacyl-tRNA biosynthesis	K01869	-	-	-
Unigene0031296	279	237	202	12	18	11	5.82	4.47	4.95	0.21	0.35	0.19	5.08	0.25	-4.34483	1.01777e-31	9.26411e-30	UBC32	PREDICTED: ubiquitin-conjugating enzyme E2 32-like isoform X1 [Prunus mume]	Genetic Information Processing;Genetic Information Processing	Folding, sorting and degradation;Folding, sorting and degradation	ko04141//Protein processing in endoplasmic reticulum;ko04120//Ubiquitin mediated proteolysis	K10578;K10578	-	-	-
Unigene0028002	10738	11172	9468	3900	3276	4915	108.92	102.42	112.88	33.64	31.07	41.3	108.073	35.3367	-1.61277	1.03898e-31	9.42969e-30	CYP73A14	cinnamate 4-hydroxylase [Prunus cerasifera x Prunus munsoniana]	Metabolism;Metabolism;Metabolism;Metabolism;Metabolism;Metabolism;Metabolism	Global and overview maps;Global and overview maps;Biosynthesis of other secondary metabolites;Biosynthesis of other secondary metabolites;Amino acid metabolism;Metabolism of cofactors and vitamins;Biosynthesis of other secondary metabolites	ko01100//Metabolic pathways;ko01110//Biosynthesis of secondary metabolites;ko00940//Phenylpropanoid biosynthesis;ko00941//Flavonoid biosynthesis;ko00360//Phenylalanine metabolism;ko00130//Ubiquinone and other terpenoid-quinone biosynthesis;ko00945//Stilbenoid, diarylheptanoid and gingerol biosynthesis	K00487;K00487;K00487;K00487;K00487;K00487;K00487	-	-	-
Unigene0036999	4	6	2	365	202	352	0.04	0.06	0.02	3.18	1.94	2.99	0.04	2.70333	6.0786	1.63584e-31	1.48037e-29	--	PREDICTED: KRR1 small subunit processome component homolog isoform X1 [Prunus mume]	-	-	-	-	-	-	-
Unigene0031939	1434	1257	928	4878	4469	4908	13.01	10.3	9.89	37.62	37.9	36.88	11.0667	37.4667	1.75939	1.67401e-31	1.51053e-29	--	hypothetical protein PRUPE_ppa017061mg [Prunus persica]	-	-	-	-	-	-	-
Unigene0007974	10870	12566	10266	3308	1663	2583	63.41	66.25	70.39	16.41	9.07	12.48	66.6833	12.6533	-2.39781	2.06932e-31	1.86185e-29	ACA9	PREDICTED: calcium-transporting ATPase 9, plasma membrane-type isoform X2 [Prunus mume]	-	-	-	-	GO:0031224//intrinsic component of membrane	GO:0005515//protein binding;GO:0019829//cation-transporting ATPase activity;GO:0032550//purine ribonucleoside binding;GO:0043169//cation binding	GO:0000904//cell morphogenesis involved in differentiation;GO:0003006//developmental process involved in reproduction;GO:0006816//calcium ion transport;GO:0009566//fertilization;GO:0009664//plant-type cell wall organization;GO:0010208//pollen wall assembly;GO:0051707//response to other organism;GO:0072503//cellular divalent inorganic cation homeostasis
Unigene0032047	3837	4704	3408	1854	1524	1656	105.29	116.67	109.92	43.26	39.1	37.64	110.627	40	-1.46763	2.10475e-31	1.88829e-29	--	hypothetical protein PRUPE_ppb010066mg [Prunus persica]	-	-	-	-	-	-	-
Unigene0029139	3821	3834	3012	1166	745	1269	33.9	30.74	31.41	8.8	6.18	9.33	32.0167	8.10333	-1.98224	3.01067e-31	2.6933e-29	CHX20	PREDICTED: cation/H(+) antiporter 20 [Prunus mume]	-	-	-	-	GO:0031224//intrinsic component of membrane	GO:0015078//hydrogen ion transmembrane transporter activity	GO:0015992//proton transport;GO:0044763//single-organism cellular process
Unigene0034526	148	210	133	1201	737	1273	0.84	1.08	0.89	5.79	3.91	5.98	0.936667	5.22667	2.48028	3.12594e-31	2.78843e-29	--	CHD3-type chromatin-remodeling factor PICKLE [Morus notabilis]	-	-	-	-	-	-	-
Unigene0013802	11	7	9	480	205	526	0.42	0.24	0.4	15.5	7.28	16.54	0.353333	13.1067	5.21313	3.89369e-31	3.46338e-29	--	PREDICTED: putative disease resistance RPP13-like protein 1 [Prunus mume]	-	-	-	-	-	-	-
Unigene0003021	6694	6844	5634	3265	2772	3500	102.79	94.98	101.68	42.63	39.8	44.52	99.8167	42.3167	-1.23805	4.1723e-31	3.70067e-29	ZIP4	PREDICTED: zinc transporter 4, chloroplastic [Prunus mume]	-	-	-	-	GO:0031224//intrinsic component of membrane	GO:0016628//oxidoreductase activity, acting on the CH-CH group of donors, NAD or NADP as acceptor;GO:0022890//inorganic cation transmembrane transporter activity	GO:0006829//zinc II ion transport;GO:0044710//single-organism metabolic process;GO:0044763//single-organism cellular process
Unigene0017602	102	146	80	638	550	686	0.97	1.25	0.89	5.15	4.88	5.39	1.03667	5.14	2.30982	4.40253e-31	3.89381e-29	--	hypothetical protein PRUPE_ppa014007mg [Prunus persica]	-	-	-	-	-	-	-
Unigene0016624	41	25	21	352	356	413	0.74	0.41	0.45	5.43	6.04	6.21	0.533333	5.89333	3.46597	4.56916e-31	4.02195e-29	At2g19130	S-locus-like receptor protein kinase, partial [Prunus persica]	-	-	-	-	-	GO:0004672//protein kinase activity;GO:0032550//purine ribonucleoside binding	GO:0006464//cellular protein modification process;GO:0006796//phosphate-containing compound metabolic process;GO:0008037//cell recognition
Unigene0013034	94	141	78	680	527	758	0.34	0.47	0.34	2.12	1.81	2.3	0.383333	2.07667	2.4376	4.57318e-31	4.02195e-29	AtMg01250	hypothetical protein PRUPE_ppa015871mg, partial [Prunus persica]	-	-	-	-	-	-	-
Unigene0000735	616	695	450	137	143	160	7.65	7.81	6.57	1.45	1.66	1.65	7.34333	1.58667	-2.21044	4.96224e-31	4.35185e-29	--	PREDICTED: LOW QUALITY PROTEIN: putative disease resistance RPP13-like protein 1 [Prunus mume]	-	-	-	-	-	-	-
Unigene0032863	45822	84288	52724	10122	11024	15174	507.53	843.77	686.38	95.33	114.16	139.21	679.227	116.233	-2.54687	4.98477e-31	4.35937e-29	CYP82G1	PREDICTED: cytochrome P450 82G1-like [Prunus mume]	Metabolism	Metabolism of terpenoids and polyketides	ko00904//Diterpenoid biosynthesis	K17961	-	GO:0016491//oxidoreductase activity;GO:0046872//metal ion binding	-
Unigene0029639	2225	2532	1951	989	840	1144	41.42	42.6	42.69	15.66	14.62	17.64	42.2367	15.9733	-1.40283	5.83569e-31	5.08928e-29	DREB3	PREDICTED: dehydration-responsive element-binding protein 3 [Prunus mume]	-	-	-	-	-	-	GO:0010467//gene expression;GO:0034645//cellular macromolecule biosynthetic process
Unigene0036953	2013	2157	1586	349	484	398	30.29	29.33	28.05	4.46	6.81	4.96	29.2233	5.41	-2.43342	6.89359e-31	5.99512e-29	At4g17280	PREDICTED: cytochrome b561 and DOMON domain-containing protein At5g47530 [Prunus mume]	-	-	-	-	-	-	-
Unigene0029415	31	65	26	971	912	543	0.8	1.52	0.79	21.38	22.08	11.65	1.03667	18.37	4.14733	7.95554e-31	6.89944e-29	MIOX1	PREDICTED: inositol oxygenase 1-like [Prunus mume]	Metabolism;Metabolism	Carbohydrate metabolism;Carbohydrate metabolism	ko00562//Inositol phosphate metabolism;ko00053//Ascorbate and aldarate metabolism	K00469;K00469	GO:0044424//intracellular part	GO:0016701//oxidoreductase activity, acting on single donors with incorporation of molecular oxygen	GO:0006020//inositol metabolic process
Unigene0027065	223	328	238	27	19	34	4.12	5.47	5.16	0.42	0.33	0.52	4.91667	0.423333	-3.53781	1.0722e-30	9.27286e-29	--	-	-	-	-	-	-	-	-
Unigene0034226	388	303	376	0	9	11	11.08	7.82	12.62	0	0.24	0.26	10.5067	0.166667	-5.9782	1.07534e-30	9.27435e-29	--	-	-	-	-	-	-	-	-
Unigene0000591	3274	4556	3096	1146	1202	1392	49.57	62.35	55.1	14.75	17.02	17.46	55.6733	16.41	-1.76241	1.59353e-30	1.37057e-28	--	-	-	-	-	-	-	-	-
Unigene0010846	432	598	413	2	2	0	2.56	3.2	2.87	0.01	0.01	0	2.87667	0.00666667	-8.75322	1.67364e-30	1.43552e-28	RE1	Zinc finger, CCCH-type [Corchorus capsularis]	-	-	-	-	-	-	-
Unigene0026618	3771	6673	3992	438	633	883	51.21	81.9	63.72	5.06	8.04	9.93	65.61	7.67667	-3.09536	1.94375e-30	1.66262e-28	CYP71A25	PREDICTED: cytochrome P450 71A24-like [Prunus mume]	-	-	-	-	-	-	-
Unigene0028349	659	657	468	148	116	178	9.29	8.37	7.76	1.77	1.53	2.08	8.47333	1.79333	-2.24029	2.54885e-30	2.17425e-28	--	PREDICTED: UPF0481 protein At3g47200-like [Prunus mume]	-	-	-	-	-	-	-
Unigene0028277	1815	2229	1718	5490	5030	6619	14.56	16.16	16.2	37.46	37.73	43.99	15.64	39.7267	1.34487	3.18254e-30	2.70741e-28	WIT1	PREDICTED: WPP domain-interacting tail-anchored protein 1 [Prunus mume]	-	-	-	-	GO:0012505//endomembrane system;GO:0016020//membrane;GO:0043227//membrane-bounded organelle;GO:0044422//organelle part	-	-
Unigene0009628	526	473	328	2019	1608	1963	5.94	4.83	4.36	19.4	16.99	18.38	5.04333	18.2567	1.85597	3.88754e-30	3.29818e-28	At3g08570	PREDICTED: BTB/POZ domain-containing protein At3g08570 [Prunus mume]	-	-	-	-	-	-	-
Unigene0019846	2435	2815	2229	667	810	766	41.18	43.03	44.31	9.59	12.81	10.73	42.84	11.0433	-1.95578	4.27187e-30	3.61442e-28	AOP1	PREDICTED: probable inactive 2-oxoglutarate-dependent dioxygenase AOP2 [Prunus mume]	-	-	-	-	-	-	-
Unigene0028561	1391	1467	1066	359	408	457	18.97	18.08	17.08	4.16	5.2	5.16	18.0433	4.84	-1.89839	4.86593e-30	4.10592e-28	At5g66900	PREDICTED: probable disease resistance protein At5g66900 [Prunus mume]	-	-	-	-	-	-	-
Unigene0026970	468	383	377	81	57	71	8.19	6.06	7.75	1.21	0.93	1.03	7.33333	1.05667	-2.79495	5.92099e-30	4.98273e-28	GALM	PREDICTED: aldose 1-epimerase-like [Prunus mume]	Metabolism;Metabolism;Metabolism;Metabolism	Global and overview maps;Global and overview maps;Carbohydrate metabolism;Carbohydrate metabolism	ko01100//Metabolic pathways;ko01110//Biosynthesis of secondary metabolites;ko00010//Glycolysis / Gluconeogenesis;ko00052//Galactose metabolism	K01785;K01785;K01785;K01785	-	GO:0005488//binding;GO:0016857//racemase and epimerase activity, acting on carbohydrates and derivatives	GO:0005996//monosaccharide metabolic process
Unigene0016416	108	129	121	910	1391	1059	2.83	3.05	3.72	20.26	34.04	22.96	3.2	25.7533	3.00862	6.71355e-30	5.63451e-28	HSP26-A	PREDICTED: probable glutathione S-transferase [Prunus mume]	Metabolism	Metabolism of other amino acids	ko00480//Glutathione metabolism	K00799	-	GO:0003824//catalytic activity	-
Unigene0026144	3725	4307	3231	12971	9301	11477	20.58	21.51	20.98	60.94	48.05	52.53	21.0233	53.84	1.35669	1.11746e-29	9.35341e-28	GRDP1	PREDICTED: glycine-rich domain-containing protein 1 [Prunus mume]	-	-	-	-	-	-	-
Unigene0024736	4	4	0	259	310	383	0.06	0.05	0	3.33	4.39	4.8	0.0366667	4.17333	6.83059	1.22851e-29	1.02554e-27	--	PREDICTED: phosphatidylinositol 4,5-bisphosphate 5-phosphatase A [Malus domestica]	-	-	-	-	-	-	-
Unigene0020273	1	3	6	631	218	616	0.02	0.04	0.11	8.13	3.09	7.73	0.0566667	6.31667	6.80052	1.24294e-29	1.03482e-27	PDR1	PREDICTED: pleiotropic drug resistance protein 1-like [Prunus mume]	-	-	-	-	-	GO:0017111//nucleoside-triphosphatase activity	GO:0044765//single-organism transport
Unigene0017811	402	548	408	73	58	105	15.56	19.17	18.56	2.4	2.1	3.37	17.7633	2.62333	-2.75943	1.341e-29	1.1135e-27	XERICO	PREDICTED: E3 ubiquitin-protein ligase RNF181-like [Pyrus x bretschneideri]	-	-	-	-	-	-	-
Unigene0000199	238	316	193	3	3	1	10.32	12.38	9.84	0.11	0.12	0.04	10.8467	0.09	-6.91311	1.61951e-29	1.34118e-27	At3g54130	PREDICTED: LOW QUALITY PROTEIN: ataxin-3 homolog, partial [Prunus mume]	Genetic Information Processing	Folding, sorting and degradation	ko04141//Protein processing in endoplasmic reticulum	K11863	-	GO:0008238//exopeptidase activity	GO:0010243//response to organonitrogen compound;GO:0010468//regulation of gene expression;GO:0019321//pentose metabolic process;GO:0019538//protein metabolic process;GO:0034645//cellular macromolecule biosynthetic process
Unigene0000090	251	300	236	1202	857	1095	3.34	3.61	3.69	13.6	10.66	12.07	3.54667	12.11	1.77166	1.71638e-29	1.41765e-27	--	-	-	-	-	-	-	-	-
Unigene0000637	0	0	2	2519	1922	2875	0	0	0.02	14.99	12.57	16.66	0.00666667	14.74	11.1105	2.01399e-29	1.65907e-27	WAK5	PREDICTED: cyclic nucleotide-gated ion channel 1-like [Prunus mume]	-	-	-	-	-	-	-
Unigene0011755	2205	2720	1927	1047	818	1115	17.43	19.44	17.91	7.04	6.05	7.3	18.26	6.79667	-1.42579	2.04267e-29	1.67827e-27	INVB	PREDICTED: probable alkaline/neutral invertase B [Prunus mume]	-	-	-	-	GO:0044444//cytoplasmic part	GO:0004553//hydrolase activity, hydrolyzing O-glycosyl compounds	-
Unigene0025953	245	269	251	0	1	7	12.17	12.08	14.66	0	0.05	0.29	12.97	0.113333	-6.83846	2.34171e-29	1.91891e-27	--	PREDICTED: TMV resistance protein N-like [Prunus mume]	-	-	-	-	-	-	-
Unigene0008462	207	225	157	1178	1538	1178	2.83	2.78	2.52	13.7	19.67	13.35	2.71	15.5733	2.52271	3.06908e-29	2.50837e-27	NUDT14	PREDICTED: nudix hydrolase 14, chloroplastic [Prunus mume]	Metabolism;Metabolism;Metabolism;Metabolism;Metabolism	Global and overview maps;Global and overview maps;Nucleotide metabolism;Carbohydrate metabolism;Carbohydrate metabolism	ko01100//Metabolic pathways;ko01110//Biosynthesis of secondary metabolites;ko00230//Purine metabolism;ko00500//Starch and sucrose metabolism;ko00051//Fructose and mannose metabolism	K18447;K18447;K18447;K18447;K18447	-	-	-
Unigene0019663	308	340	302	2	3	0	3.29	3.28	3.79	0.02	0.03	0	3.45333	0.0166667	-7.69488	3.61366e-29	2.94574e-27	ASP1	PREDICTED: aspartic proteinase Asp1 isoform X1 [Fragaria vesca subsp. vesca] [Fragaria vesca]	-	-	-	-	-	-	-
Unigene0009917	777	802	654	129	178	156	10.53	9.83	10.42	1.49	2.26	1.75	10.26	1.83333	-2.48449	3.87785e-29	3.15288e-27	ZK795.3	PREDICTED: U3 small nucleolar ribonucleoprotein protein IMP4-like [Prunus mume]	Genetic Information Processing	Translation	ko03008//Ribosome biogenesis in eukaryotes	K14561	-	-	-
Unigene0000474	280	366	307	2	1	2	1.46	1.73	1.89	0.01	0	0.01	1.69333	0.00666667	-7.98868	5.21027e-29	4.22519e-27	RGA2	PREDICTED: LOW QUALITY PROTEIN: putative disease resistance RPP13-like protein 1 [Prunus mume]	-	-	-	-	-	-	-
Unigene0000150	0	2	2	788	386	817	0	0.06	0.08	21.77	11.72	21.99	0.0466667	18.4933	8.6304	6.01491e-29	4.86507e-27	RPP2A	PREDICTED: TMV resistance protein N-like [Prunus mume]	-	-	-	-	-	-	-
Unigene0007211	298	702	342	19	26	37	12.34	26.27	16.64	0.67	1.01	1.27	18.4167	0.983333	-4.22719	7.16064e-29	5.7768e-27	--	-	-	-	-	-	-	-	-
Unigene0035802	2273	1553	1822	0	2	0	123.47	76.24	116.33	0	0.1	0	105.347	0.0333333	-11.6259	8.24456e-29	6.6341e-27	--	hypothetical protein PRUPE_ppa013789mg [Prunus persica]	-	-	-	-	-	-	-
Unigene0034891	39763	44829	33209	19821	19229	21823	723.29	736.99	709.99	306.58	327.02	328.81	723.423	320.803	-1.17315	8.58016e-29	6.8864e-27	GLX1	hypothetical protein PRUPE_ppa009462mg [Prunus persica]	Metabolism	Carbohydrate metabolism	ko00620//Pyruvate metabolism	K01759	-	GO:0003824//catalytic activity;GO:0043169//cation binding	-
Unigene0027796	3051	4742	2973	618	423	925	13.28	18.66	15.21	2.29	1.72	3.34	15.7167	2.45	-2.68144	1.08959e-28	8.72255e-27	N	PREDICTED: TMV resistance protein N-like [Prunus mume]	-	-	-	-	-	-	-
Unigene0001971	304	360	271	69	55	57	2.8	3	2.94	0.54	0.47	0.44	2.91333	0.483333	-2.59158	1.23223e-28	9.83927e-27	At1g31830	PREDICTED: probable polyamine transporter At1g31830 [Prunus mume]	-	-	-	-	GO:0031224//intrinsic component of membrane	GO:0046943//carboxylic acid transmembrane transporter activity	-
Unigene0023364	656	537	592	59	55	25	15.11	11.18	16.03	1.16	1.18	0.48	14.1067	0.94	-3.90757	1.3694e-28	1.09066e-26	TOM2AH3	PREDICTED: tetraspanin-19-like [Prunus mume]	-	-	-	-	-	-	-
Unigene0029817	0	3	0	949	638	1016	0	0.02	0	7.44	5.5	7.75	0.00666667	6.89667	10.0147	1.57226e-28	1.24905e-26	AtMg01250	LINE-type retrotransposon LIb DNA [Ipomoea batatas]	-	-	-	-	-	-	-
Unigene0016513	32	71	52	806	445	681	0.17	0.35	0.33	3.72	2.26	3.06	0.283333	3.01333	3.41079	1.68987e-28	1.33779e-26	AtMg00310	reverse transcriptase [Corchorus capsularis]	-	-	-	-	-	-	-
Unigene0013934	208	121	148	1642	1218	1248	4.86	2.56	4.07	32.64	26.62	24.17	3.83	27.81	2.86019	1.69253e-28	1.33779e-26	At3g43660	PREDICTED: vacuolar iron transporter homolog 4-like [Prunus mume]	-	-	-	-	-	-	-
Unigene0000105	96	115	70	488	505	628	2.53	2.74	2.17	10.95	12.45	13.72	2.48	12.3733	2.31882	1.72373e-28	1.35901e-26	--	PREDICTED: la-related protein 6A [Prunus mume]	Genetic Information Processing	Translation	ko03010//Ribosome	K02882	-	-	-
Unigene0029535	10	15	9	202	284	324	0.24	0.32	0.25	4.09	6.33	6.39	0.27	5.60333	4.37525	1.80176e-28	1.41695e-26	--	PREDICTED: uncharacterized mitochondrial protein AtMg00810-like [Malus domestica]	-	-	-	-	-	-	-
Unigene0028136	1172	632	641	0	1	2	46.74	22.78	30.04	0	0.04	0.07	33.1867	0.0366667	-9.82192	1.92357e-28	1.50894e-26	--	PREDICTED: heavy metal-associated isoprenylated plant protein 3-like [Prunus mume]	-	-	-	-	-	-	-
Unigene0035898	192	233	147	2	4	4	2.81	3.08	2.53	0.02	0.05	0.05	2.80667	0.04	-6.13271	2.04687e-28	1.60164e-26	BZIP34	PREDICTED: basic leucine zipper 61-like isoform X2 [Prunus mume]	-	-	-	-	-	-	-
Unigene0029132	3609	3913	2686	11351	12953	12586	30.62	30	26.78	81.88	102.74	88.44	29.1333	91.02	1.64351	3.57996e-28	2.79425e-26	HAB1	PREDICTED: protein phosphatase 2C 77 [Prunus mume]	Environmental Information Processing;Environmental Information Processing	Signal transduction;Signal transduction	ko04075//Plant hormone signal transduction;ko04016//MAPK signaling pathway - plant	K14497;K14497	-	GO:0016787//hydrolase activity	-
Unigene0035725	7642	6435	7175	1486	1477	1028	162.71	123.83	179.56	26.9	29.4	18.13	155.367	24.81	-2.64668	4.21373e-28	3.28072e-26	--	PREDICTED: metallothiol transferase FosB [Citrus sinensis]	-	-	-	-	-	-	-
Unigene0001094	2685	4911	3213	170	161	481	34.57	57.15	48.63	1.86	1.94	5.13	46.7833	2.97667	-3.97423	5.28604e-28	4.10536e-26	CYP75B2	PREDICTED: flavonoid 3'-monooxygenase-like [Prunus mume]	Metabolism;Metabolism;Metabolism	Global and overview maps;Global and overview maps;Metabolism of terpenoids and polyketides	ko01100//Metabolic pathways;ko01110//Biosynthesis of secondary metabolites;ko00905//Brassinosteroid biosynthesis	K20623;K20623;K20623	-	GO:0016491//oxidoreductase activity;GO:0046906//tetrapyrrole binding;GO:0046914//transition metal ion binding	GO:0044710//single-organism metabolic process
Unigene0005788	539	386	342	2	0	2	18	11.65	13.43	0.06	0	0.06	14.36	0.04	-8.48784	6.00085e-28	4.64895e-26	--	PREDICTED: heavy metal-associated isoprenylated plant protein 3-like [Prunus mume]	-	-	-	-	-	-	-
Unigene0018086	842	971	717	353	267	339	6.91	7.2	6.91	2.46	2.05	2.3	7.00667	2.27	-1.62604	6.07824e-28	4.69725e-26	SD25	PREDICTED: G-type lectin S-receptor-like serine/threonine-protein kinase SD2-5 [Prunus mume]	-	-	-	-	-	GO:0004713//protein tyrosine kinase activity;GO:0032550//purine ribonucleoside binding	GO:0006468//protein phosphorylation
Unigene0000077	1104	1479	963	437	397	434	6.78	8.21	6.95	2.28	2.28	2.21	7.31333	2.25667	-1.69634	7.30912e-28	5.63452e-26	At1g56130	hypothetical protein PRUPE_4G104900 [Prunus persica]	-	-	-	-	-	-	-
Unigene0007918	582	684	458	0	1	2	7.46	7.92	6.9	0	0.01	0.02	7.42667	0.01	-9.53657	1.18647e-27	9.12381e-26	DTX27	PREDICTED: protein DETOXIFICATION 27-like [Prunus mume]	-	-	-	-	GO:0031224//intrinsic component of membrane	GO:0015291//secondary active transmembrane transporter activity	GO:0044763//single-organism cellular process
Unigene0015695	0	0	0	1880	1301	1977	0	0	0	10.93	8.32	11.2	0.001	10.15	13.3092	1.35176e-27	1.03694e-25	RPM1	PREDICTED: disease resistance protein RPM1-like [Prunus mume]	Organismal Systems	Environmental adaptation	ko04626//Plant-pathogen interaction	K13457	-	-	-
Unigene0034482	36137	42918	31137	10366	7933	14739	379.63	407.49	384.46	92.6	77.92	128.25	390.527	99.59	-1.97135	1.49279e-27	1.14232e-25	VTC2	PREDICTED: GDP-L-galactose phosphorylase 1 [Prunus mume]	Metabolism;Metabolism;Metabolism	Global and overview maps;Global and overview maps;Carbohydrate metabolism	ko01100//Metabolic pathways;ko01110//Biosynthesis of secondary metabolites;ko00053//Ascorbate and aldarate metabolism	K14190;K14190;K14190	-	GO:0004645//phosphorylase activity;GO:0016772//transferase activity, transferring phosphorus-containing groups	-
Unigene0000128	1801	1668	1283	567	471	665	10.3	8.62	8.62	2.76	2.52	3.15	9.18	2.81	-1.70792	1.56081e-27	1.19144e-25	At1g07650	PREDICTED: probable LRR receptor-like serine/threonine-protein kinase At1g07650 [Prunus mume]	-	-	-	-	-	GO:0004672//protein kinase activity;GO:0032550//purine ribonucleoside binding	GO:0006464//cellular protein modification process;GO:0006796//phosphate-containing compound metabolic process
Unigene0027507	318	339	333	69	51	64	2.18	2.1	2.68	0.4	0.33	0.36	2.32	0.363333	-2.67476	1.62237e-27	1.23542e-25	XA21	PREDICTED: probable LRR receptor-like serine/threonine-protein kinase At3g47570 [Prunus mume]	-	-	-	-	-	-	-
Unigene0035700	894	1040	907	124	122	239	29.65	31.18	35.36	3.5	3.78	6.57	32.0633	4.61667	-2.796	1.93233e-27	1.46787e-25	--	PREDICTED: blue copper protein-like [Juglans regia]	-	-	-	-	-	-	-
Unigene0008445	558	689	447	0	1	2	4.23	4.72	3.98	0	0.01	0.01	4.31	0.00666667	-9.33651	2.00884e-27	1.52228e-25	--	orf169 (mitochondrion) [Batis maritima]	-	-	-	-	-	-	-
Unigene0005113	395	494	353	75	85	64	16.05	18.14	16.86	2.59	3.23	2.15	17.0167	2.65667	-2.67926	2.0647e-27	1.56083e-25	ATL8	PREDICTED: RING-H2 finger protein ATL80-like [Prunus mume]	-	-	-	-	-	-	-
Unigene0001888	225890	292047	207037	116675	80485	106839	1978.99	2312.42	2131.88	869.17	659.25	775.3	2141.1	767.907	-1.47935	3.3657e-27	2.53818e-25	PCKA	PREDICTED: LOW QUALITY PROTEIN: phosphoenolpyruvate carboxykinase [ATP] [Amborella trichopoda]	Metabolism;Metabolism;Metabolism;Metabolism;Metabolism;Metabolism;Metabolism	Global and overview maps;Global and overview maps;Global and overview maps;Carbohydrate metabolism;Energy metabolism;Carbohydrate metabolism;Carbohydrate metabolism	ko01100//Metabolic pathways;ko01110//Biosynthesis of secondary metabolites;ko01200//Carbon metabolism;ko00010//Glycolysis / Gluconeogenesis;ko00710//Carbon fixation in photosynthetic organisms;ko00620//Pyruvate metabolism;ko00020//Citrate cycle (TCA cycle)	K01610;K01610;K01610;K01610;K01610;K01610;K01610	-	-	-
Unigene0026700	10637	10295	9240	4253	2884	3304	94.9	83.01	96.89	32.26	24.06	24.42	91.6	26.9133	-1.76703	3.80748e-27	2.86442e-25	At3g15720	PREDICTED: probable polygalacturonase At3g15720 [Pyrus x bretschneideri]	Metabolism;Metabolism	Global and overview maps;Carbohydrate metabolism	ko01100//Metabolic pathways;ko00040//Pentose and glucuronate interconversions	K01184;K01184	-	-	-
Unigene0031139	1663	2083	1348	4885	4058	5121	16.37	18.54	15.6	40.9	37.36	41.76	16.8367	40.0067	1.24863	3.97031e-27	2.97974e-25	At4g00750	PREDICTED: probable methyltransferase PMT15 [Prunus mume]	-	-	-	-	-	-	-
Unigene0023469	149	235	147	7	7	4	3.27	4.66	3.79	0.13	0.14	0.07	3.90667	0.113333	-5.10729	4.35277e-27	3.25894e-25	elmoA	PREDICTED: ELMO domain-containing protein A [Prunus mume]	-	-	-	-	-	-	GO:0006897//endocytosis
Unigene0024071	312	197	269	4	6	0	4.8	2.74	4.86	0.05	0.09	0	4.13333	0.0466667	-6.46877	4.6553e-27	3.47711e-25	CYP93A3	PREDICTED: cytochrome P450 93A3-like [Prunus mume]	-	-	-	-	-	GO:0016491//oxidoreductase activity;GO:0046906//tetrapyrrole binding;GO:0046914//transition metal ion binding	GO:0044710//single-organism metabolic process
Unigene0012717	545	742	470	119	141	154	5.52	6.79	5.59	1.02	1.33	1.29	5.96667	1.21333	-2.29795	5.22621e-27	3.89421e-25	--	SOUL heme-binding family protein isoform 1 [Theobroma cacao]	-	-	-	-	-	-	-
Unigene0000091	373	605	314	66	41	74	3.85	5.64	3.81	0.58	0.4	0.63	4.43333	0.536667	-3.04629	6.19913e-27	4.60817e-25	RPS10	PREDICTED: vesicle transport protein SFT2B [Prunus mume]	-	-	-	-	-	-	-
Unigene0004746	357	358	253	54	62	65	13	11.78	10.83	1.67	2.11	1.96	11.87	1.91333	-2.63316	6.30472e-27	4.67553e-25	RLM1A	PREDICTED: disease resistance protein RML1A-like [Prunus mume]	-	-	-	-	-	-	-
Unigene0021179	502	658	436	0	2	1	17.71	20.98	18.08	0	0.07	0.03	18.9233	0.0333333	-9.14898	6.59592e-27	4.87989e-25	XXT5	PREDICTED: probable xyloglucan 6-xylosyltransferase 5 [Prunus mume]	-	-	-	-	-	-	-
Unigene0035554	1638	2782	1772	19392	35592	17843	36.99	56.78	47.03	372.37	751.46	333.76	46.9333	485.863	3.37187	6.81388e-27	5.02923e-25	--	hypothetical protein PRUPE_ppa013701mg [Prunus persica]	-	-	-	-	-	-	-
Unigene0033514	1606	1427	1153	478	324	357	14.35	11.53	12.11	3.63	2.71	2.64	12.6633	2.99333	-2.08083	1.05998e-26	7.8051e-25	SBT1.7	PREDICTED: subtilisin-like protease SBT1.7 [Prunus mume]	-	-	-	-	GO:0005576//extracellular region;GO:0005618//cell wall	GO:0005515//protein binding;GO:0070011//peptidase activity, acting on L-amino acid peptides	GO:0003006//developmental process involved in reproduction;GO:0009892//negative regulation of metabolic process;GO:0010191//mucilage metabolic process;GO:0019538//protein metabolic process;GO:0044702//single organism reproductive process
Unigene0034661	365	472	298	95	81	93	4.48	5.24	4.3	0.99	0.93	0.95	4.67333	0.956667	-2.28836	1.07542e-26	7.90017e-25	UBC37	PREDICTED: probable ubiquitin-conjugating enzyme E2 37 isoform X1 [Juglans regia]	-	-	-	-	-	-	-
Unigene0033303	196	313	214	21	26	30	1.97	2.85	2.53	0.18	0.24	0.25	2.45	0.223333	-3.45551	1.69033e-26	1.23882e-24	--	hypothetical protein PRUPE_ppb021413mg [Prunus persica]	-	-	-	-	-	-	-
Unigene0028352	2203	2080	1715	6757	7018	6695	31.9	27.22	29.19	83.19	95	80.29	29.4367	86.16	1.5494	1.82586e-26	1.33502e-24	MBF1B	PREDICTED: multiprotein-bridging factor 1b-like [Malus domestica]	-	-	-	-	-	GO:0003677//DNA binding	-
Unigene0026755	343	424	301	45	37	77	2.92	3.27	3.02	0.33	0.29	0.54	3.07	0.386667	-2.98908	2.40671e-26	1.75561e-24	AtMg00310	PREDICTED: uncharacterized protein LOC103936764 [Pyrus x bretschneideri]	-	-	-	-	-	-	-
Unigene0007639	1124	1608	1073	446	414	494	13.3	17.2	14.93	4.49	4.58	4.84	15.1433	4.63667	-1.70752	2.6529e-26	1.93068e-24	SRD5A1	PREDICTED: very-long-chain enoyl-CoA reductase-like [Prunus mume]	-	-	-	-	-	-	-
Unigene0013532	1652	1631	1378	4744	3648	4623	26.87	23.98	26.35	65.62	55.48	62.29	25.7333	61.13	1.24824	3.02846e-26	2.19887e-24	PPA6	PREDICTED: soluble inorganic pyrophosphatase 6, chloroplastic [Prunus mume]	Metabolism	Energy metabolism	ko00190//Oxidative phosphorylation	K01507	-	-	-
Unigene0004144	353	418	352	78	46	87	4	4.29	4.69	0.75	0.49	0.82	4.32667	0.686667	-2.65557	3.5473e-26	2.56961e-24	NFD4	PREDICTED: protein NUCLEAR FUSION DEFECTIVE 4-like [Prunus mume]	-	-	-	-	-	-	-
Unigene0005160	1229	1526	1274	404	221	389	22.24	24.95	27.09	6.22	3.74	5.83	24.76	5.26333	-2.23396	3.55712e-26	2.57076e-24	--	PREDICTED: DNA topoisomerase 1 isoform X1 [Solanum pennellii]	-	-	-	-	-	-	-
Unigene0023251	1331	1753	1340	457	503	558	31.03	36.93	36.71	9.06	10.96	10.77	34.89	10.2633	-1.76531	3.92644e-26	2.83112e-24	Cmbl	PREDICTED: endo-1,3;1,4-beta-D-glucanase-like [Prunus mume]	-	-	-	-	-	-	-
Unigene0016339	27	31	20	263	202	303	2.3	2.39	2	19.05	16.08	21.38	2.23	18.8367	3.07843	4.70198e-26	3.3825e-24	--	-	-	-	-	-	-	-	-
Unigene0000613	177	223	147	6	14	11	2.24	2.55	2.18	0.06	0.17	0.12	2.32333	0.116667	-4.31573	4.8364e-26	3.4712e-24	--	PREDICTED: cytochrome c oxidase assembly protein COX15-like [Prunus mume]	-	-	-	-	-	-	-
Unigene0031574	386	395	269	60	72	68	17.63	16.31	14.44	2.33	3.08	2.57	16.1267	2.66	-2.59995	4.95452e-26	3.54782e-24	--	PREDICTED: transmembrane protein 40-like [Malus domestica]	-	-	-	-	-	-	-
Unigene0028430	1449	1660	1161	295	292	496	14.14	14.64	13.32	2.45	2.66	4.01	14.0333	3.04	-2.20671	6.78486e-26	4.84737e-24	At2g25737	TauE domain-containing protein [Cephalotus follicularis]	-	-	-	-	-	-	-
Unigene0031028	22	35	28	383	353	272	0.18	0.26	0.27	2.71	2.74	1.87	0.236667	2.44	3.36595	1.5814e-25	1.12723e-23	POT1	KUP1 [Prunus persica]	-	-	-	-	GO:0031224//intrinsic component of membrane	GO:0046873//metal ion transmembrane transporter activity	GO:0030001//metal ion transport;GO:0034220//ion transmembrane transport
Unigene0036663	4	0	3	264	198	256	0.06	0	0.05	3.12	2.58	2.95	0.0366667	2.88333	6.29712	1.7223e-25	1.22487e-23	--	PREDICTED: protein OBERON 1-like [Prunus mume]	-	-	-	-	-	-	-
Unigene0003527	897	964	811	4046	2522	4328	11.7	11.37	12.44	44.88	30.76	46.77	11.8367	40.8033	1.78542	1.9548e-25	1.38706e-23	MEE23	PREDICTED: flavin-dependent oxidoreductase FOX3-like [Prunus mume]	Metabolism;Metabolism;Metabolism	Global and overview maps;Global and overview maps;Biosynthesis of other secondary metabolites	ko01100//Metabolic pathways;ko01110//Biosynthesis of secondary metabolites;ko00940//Phenylpropanoid biosynthesis	K22395;K22395;K22395	-	GO:0000166//nucleotide binding;GO:0016616//oxidoreductase activity, acting on the CH-OH group of donors, NAD or NADP as acceptor;GO:0046993//oxidoreductase activity, acting on X-H and Y-H to form an X-Y bond, with oxygen as acceptor	GO:0044710//single-organism metabolic process
Unigene0030595	1393	800	895	0	0	0	12.89	6.69	9.73	0	0	0	9.77	0.001	-13.2541	2.00098e-25	1.41661e-23	--	PREDICTED: uncharacterized protein LOC103340052 [Prunus mume]	-	-	-	-	-	-	-
Unigene0001600	7877	8437	6164	3271	2256	3581	68.28	66.1	62.8	24.11	18.28	25.71	65.7267	22.7	-1.53379	2.23744e-25	1.58043e-23	OPT3	PREDICTED: oligopeptide transporter 3 [Prunus mume]	-	-	-	-	GO:0031224//intrinsic component of membrane	-	GO:0008104//protein localization;GO:0042886//amide transport;GO:0044707//single-multicellular organism process
Unigene0000730	126729	150871	115523	58847	60345	60088	2387.13	2568.47	2557.62	942.55	1062.74	937.52	2504.41	980.937	-1.35224	2.33924e-25	1.64861e-23	PIP1.4	aquaporin PIP 1.2 [Prunus cerasifera x Prunus munsoniana]	-	-	-	-	GO:0031224//intrinsic component of membrane	-	GO:0051234//establishment of localization
Unigene0005694	5	117	72	101072	93560	110653	0.14	2.96	2.37	2402.68	2445.46	2562.37	1.82333	2470.17	10.4038	2.36883e-25	1.6657e-23	--	hypothetical protein PRUPE_ppb010572mg [Prunus persica]	-	-	-	-	-	-	-
Unigene0004901	234	377	280	24	21	45	10.63	15.48	14.95	0.93	0.89	1.69	13.6867	1.17	-3.54819	2.51852e-25	1.76698e-23	--	PREDICTED: A-kinase anchor protein 13-like [Malus domestica]	-	-	-	-	-	-	-
Unigene0030186	9666	11281	8589	5357	5041	5919	41.85	44.14	43.71	19.72	20.41	21.23	43.2333	20.4533	-1.07981	2.69905e-25	1.88939e-23	Sas10	PREDICTED: something about silencing protein 10 [Prunus mume]	-	-	-	-	-	-	-
Unigene0000512	325	287	231	22	39	31	21.77	17.38	18.19	1.25	2.44	1.72	19.1133	1.80333	-3.40584	2.88781e-25	2.01701e-23	--	-	-	-	-	-	-	-	-
Unigene0011349	1095	1054	829	2867	2446	2914	8.84	7.69	7.87	19.68	18.46	19.49	8.13333	19.21	1.23994	2.93529e-25	2.04559e-23	ET2	PREDICTED: protein EFFECTOR OF TRANSCRIPTION 2 [Prunus mume]	-	-	-	-	-	-	-
Unigene0027496	65	55	39	344	352	409	1.03	0.78	0.72	4.62	5.19	5.35	0.843333	5.05333	2.58306	2.94286e-25	2.0463e-23	--	-	-	-	-	-	-	-	-
Unigene0006862	547	662	531	193	184	190	5.42	5.93	6.19	1.63	1.71	1.56	5.84667	1.63333	-1.8398	3.16873e-25	2.19846e-23	PI4KG1	PREDICTED: phosphatidylinositol 4-kinase gamma 8 [Prunus mume]	-	-	-	-	-	GO:0016772//transferase activity, transferring phosphorus-containing groups	GO:0006796//phosphate-containing compound metabolic process
Unigene0018462	1073	994	984	0	2	0	37.91	31.74	40.86	0	0.07	0	36.8367	0.0233333	-10.6245	3.33453e-25	2.30837e-23	--	hypothetical protein PRUPE_1G121400 [Prunus persica]	-	-	-	-	-	-	-
Unigene0029944	2311	3297	2101	13071	7858	14212	13.9	17.92	14.85	66.83	44.18	70.78	15.5567	60.5967	1.96171	3.54107e-25	2.44528e-23	VIL2	PREDICTED: VIN3-like protein 2 [Prunus mume]	-	-	-	-	-	-	-
Unigene0015432	341	336	221	1540	1851	1459	8.82	7.85	6.72	33.87	44.76	31.26	7.79667	36.63	2.2321	3.54797e-25	2.44528e-23	--	PREDICTED: uncharacterized protein LOC103344215 [Prunus mume]	-	-	-	-	-	-	-
Unigene0026461	187	250	168	885	719	783	3.07	3.71	3.24	12.36	11.04	10.65	3.34	11.35	1.76477	3.70021e-25	2.54459e-23	SCPL18	PREDICTED: serine carboxypeptidase-like 2 [Prunus mume]	-	-	-	-	-	-	-
Unigene0036506	223	263	200	45	34	37	2.04	2.18	2.15	0.35	0.29	0.28	2.12333	0.306667	-2.79159	3.71106e-25	2.54644e-23	CLC-C	PREDICTED: chloride channel protein CLC-c-like [Prunus mume]	-	-	-	-	-	-	-
Unigene0029520	486	428	393	1	2	0	55.72	44.35	52.96	0.1	0.21	0	51.01	0.103333	-8.94733	4.12176e-25	2.82205e-23	--	-	-	-	-	-	-	-	-
Unigene0027799	5199	10627	5712	928	1309	1442	147.07	271.7	189.92	22.32	34.62	33.79	202.897	30.2433	-2.74606	4.52311e-25	3.09007e-23	--	-	-	-	-	-	-	-	-
Unigene0004020	130	74	87	700	703	827	1.86	0.95	1.46	8.49	9.38	9.78	1.42333	9.21667	2.69497	4.64211e-25	3.16444e-23	GSVIVT00026920001	PREDICTED: probable polygalacturonase [Prunus mume]	-	-	-	-	-	-	-
Unigene0023279	222	172	169	10	16	14	3.02	2.11	2.7	0.12	0.2	0.16	2.61	0.16	-4.02791	5.03774e-25	3.42665e-23	PES	PREDICTED: pescadillo homolog [Prunus mume]	-	-	-	-	GO:0031981//nuclear lumen	-	GO:0006364//rRNA processing
Unigene0036844	42	69	48	375	323	366	1.86	2.76	2.5	14.13	13.39	13.44	2.37333	13.6533	2.52427	5.42349e-25	3.68101e-23	--	hypothetical protein PRUPE_1G203600 [Prunus persica]	-	-	-	-	-	-	-
Unigene0007777	2	4	1	259	255	210	0.03	0.05	0.02	3.2	3.46	2.53	0.0333333	3.06333	6.52199	5.61156e-25	3.8004e-23	--	hypothetical protein PRUPE_4G000900 [Prunus persica]	-	-	-	-	-	-	-
Unigene0002429	220	160	186	13	11	17	7.76	5.1	7.71	0.39	0.36	0.5	6.85667	0.416667	-4.04054	5.72465e-25	3.8686e-23	--	PREDICTED: disease resistance protein RGA2-like [Prunus mume]	-	-	-	-	-	-	-
Unigene0000568	7919	10148	8013	2236	2214	1481	78.39	90.79	93.23	18.82	20.49	12.14	87.47	17.15	-2.35058	5.78298e-25	3.89958e-23	CNGC1	PREDICTED: cyclic nucleotide-gated ion channel 1-like [Prunus mume]	Organismal Systems	Environmental adaptation	ko04626//Plant-pathogen interaction	K05391	-	-	-
Unigene0000398	0	0	2	1334	1285	1185	0	0	0.03	15.22	16.12	13.17	0.01	14.8367	10.535	5.87114e-25	3.95049e-23	HSP70	PREDICTED: heat shock 70 kDa protein 18-like [Prunus mume]	Genetic Information Processing;Genetic Information Processing;Cellular Processes	Folding, sorting and degradation;Transcription;Transport and catabolism	ko04141//Protein processing in endoplasmic reticulum;ko03040//Spliceosome;ko04144//Endocytosis	K03283;K03283;K03283	-	-	-
Unigene0003269	222	296	216	1390	1806	1287	2.51	3.03	2.87	13.38	19.11	12.07	2.80333	14.8533	2.40557	6.30364e-25	4.23059e-23	FDM1	PREDICTED: factor of DNA methylation 1-like [Prunus mume]	-	-	-	-	-	-	-
Unigene0011485	773	921	756	206	186	303	7.11	7.65	8.17	1.61	1.6	2.31	7.64333	1.84	-2.0545	6.31451e-25	4.23059e-23	ACBP4	PREDICTED: acyl-CoA-binding domain-containing protein 4 [Prunus mume]	-	-	-	-	-	-	-
Unigene0007239	92	149	83	601	623	618	0.96	1.41	1.02	5.36	6.11	5.37	1.13	5.61333	2.31253	7.37965e-25	4.93362e-23	At3g59000	PREDICTED: F-box/FBD/LRR-repeat protein At5g22700-like isoform X2 [Fragaria vesca subsp. vesca] [Fragaria vesca]	-	-	-	-	-	-	-
Unigene0010207	7475	8211	6321	3088	3149	3955	231.5	229.83	230.09	81.32	91.18	101.46	230.473	91.32	-1.3356	7.46916e-25	4.98279e-23	PSAH	PREDICTED: photosystem I reaction center subunit VI, chloroplastic [Prunus mume]	Metabolism;Metabolism	Global and overview maps;Energy metabolism	ko01100//Metabolic pathways;ko00195//Photosynthesis	K02695;K02695	-	-	-
Unigene0023639	2531	2880	2389	1273	1114	1168	42.03	43.23	46.63	17.98	17.3	16.07	43.9633	17.1167	-1.3609	7.91483e-25	5.26885e-23	At5g14450	PREDICTED: GDSL esterase/lipase At5g14450-like isoform X2 [Prunus mume]	-	-	-	-	GO:0005618//cell wall;GO:0005911//cell-cell junction	GO:0016787//hydrolase activity	GO:0006629//lipid metabolic process
Unigene0036970	2323	1804	1818	498	319	604	22.17	15.56	20.39	4.04	2.85	4.77	19.3733	3.88667	-2.31747	7.94062e-25	5.27477e-23	PAL1	phenylalanine ammonia lyase [Prunus salicina]	Metabolism;Metabolism;Metabolism;Metabolism	Global and overview maps;Global and overview maps;Biosynthesis of other secondary metabolites;Amino acid metabolism	ko01100//Metabolic pathways;ko01110//Biosynthesis of secondary metabolites;ko00940//Phenylpropanoid biosynthesis;ko00360//Phenylalanine metabolism	K10775;K10775;K10775;K10775	-	-	-
Unigene0010229	5	5	4	179	227	187	0.19	0.18	0.18	5.92	8.26	6.03	0.183333	6.73667	5.19949	8.211e-25	5.4428e-23	At1g07650	PREDICTED: probable LRR receptor-like serine/threonine-protein kinase At1g53420 [Prunus mume]	-	-	-	-	-	-	-
Unigene0027785	3962	4740	3261	1788	1144	1698	38.79	41.94	37.52	14.88	10.47	13.77	39.4167	13.04	-1.59586	1.00492e-24	6.64718e-23	CNGC2	PREDICTED: LOW QUALITY PROTEIN: cyclic nucleotide-gated ion channel 2 [Prunus mume]	Organismal Systems	Environmental adaptation	ko04626//Plant-pathogen interaction	K05391	-	-	-
Unigene0036119	772	956	630	101	168	163	8.12	9.08	7.79	0.9	1.65	1.42	8.33	1.32333	-2.65414	1.09389e-24	7.22038e-23	SD11	PREDICTED: G-type lectin S-receptor-like serine/threonine-protein kinase SD1-1 isoform X1 [Prunus mume]	-	-	-	-	-	-	-
Unigene0008640	1490	1837	1350	531	594	645	25.99	28.96	27.68	7.88	9.69	9.32	27.5433	8.96333	-1.6196	1.10157e-24	7.25569e-23	--	PREDICTED: MATH domain and coiled-coil domain-containing protein At3g58410-like [Fragaria vesca subsp. vesca] [Fragaria vesca]	-	-	-	-	-	-	-
Unigene0020443	59	15	18	6085	4253	11875	0.73	0.17	0.26	63.8	49.03	121.28	0.386667	78.0367	7.65692	1.28835e-24	8.46811e-23	LAC7	PREDICTED: laccase-7 [Prunus mume]	-	-	-	-	-	-	-
Unigene0019691	1312	1343	1223	6083	3681	6202	12.16	11.25	13.33	47.96	31.91	47.63	12.2467	42.5	1.79507	1.5926e-24	1.04336e-22	BXL1	alpha-L-arabinofuranosidase/beta-D-xylosidase [Prunus salicina]	-	-	-	-	-	GO:0003824//catalytic activity	GO:0044238//primary metabolic process
Unigene0001226	225	219	173	1233	979	869	2.84	2.5	2.57	13.26	11.57	9.1	2.63667	11.31	2.10081	1.59406e-24	1.04336e-22	HT1	PREDICTED: serine/threonine-protein kinase HT1-like [Prunus mume]	-	-	-	-	-	GO:0004672//protein kinase activity;GO:0032550//purine ribonucleoside binding	GO:0006464//cellular protein modification process;GO:0006796//phosphate-containing compound metabolic process
Unigene0036944	2996	3644	2580	9931	6932	10187	18.49	20.33	18.71	52.12	40	52.08	19.1767	48.0667	1.32568	1.60952e-24	1.05127e-22	ctps	PREDICTED: CTP synthase [Prunus mume]	Metabolism;Metabolism	Global and overview maps;Nucleotide metabolism	ko01100//Metabolic pathways;ko00240//Pyrimidine metabolism	K01937;K01937	-	GO:0016879//ligase activity, forming carbon-nitrogen bonds;GO:0032550//purine ribonucleoside binding	GO:0006241//CTP biosynthetic process;GO:0009064//glutamine family amino acid metabolic process
Unigene0010651	611	581	485	164	158	142	21.46	18.44	20.02	4.9	5.19	4.13	19.9733	4.74	-2.07512	1.63255e-24	1.06409e-22	GASA9	PREDICTED: gibberellin-regulated protein 9 [Prunus mume]	-	-	-	-	-	-	-
Unigene0020057	32	29	39	323	451	396	0.62	0.51	0.89	5.32	8.17	6.35	0.673333	6.61333	3.29598	1.71267e-24	1.11398e-22	--	Terminal uridylyltransferase 7 [Anthurium amnicola]	-	-	-	-	-	-	-
Unigene0022833	162	199	190	14	3	9	7.87	8.74	10.85	0.58	0.14	0.36	9.15333	0.36	-4.66823	1.99854e-24	1.29723e-22	--	-	-	-	-	-	-	-	-
Unigene0025398	149	208	164	2	9	4	3.04	3.83	3.93	0.03	0.17	0.07	3.6	0.09	-5.32193	2.06006e-24	1.33438e-22	VRN1	PREDICTED: B3 domain-containing transcription factor VRN1-like [Pyrus x bretschneideri]	-	-	-	-	-	-	-
Unigene0014907	668	698	598	245	229	256	11.12	10.51	11.7	3.47	3.57	3.53	11.11	3.52333	-1.65685	2.10486e-24	1.36058e-22	--	hypothetical protein PRUPE_3G239700 [Prunus persica]	-	-	-	-	-	-	-
Unigene0033548	254	225	150	0	2	4	15.3	12.25	10.62	0	0.11	0.2	12.7233	0.103333	-6.94403	2.13716e-24	1.3786e-22	--	hypothetical protein PRUPE_7G236500 [Prunus persica]	-	-	-	-	-	-	-
Unigene0029016	2836	3443	2503	1353	864	1184	19.56	21.47	20.29	7.94	5.57	6.77	20.44	6.76	-1.5963	2.14759e-24	1.38247e-22	At5g49770	PREDICTED: probable leucine-rich repeat receptor-like protein kinase At5g49770 [Pyrus x bretschneideri]	-	-	-	-	GO:0031224//intrinsic component of membrane	GO:0004672//protein kinase activity;GO:0032550//purine ribonucleoside binding	GO:0006464//cellular protein modification process;GO:0006796//phosphate-containing compound metabolic process;GO:0044085//cellular component biogenesis;GO:0045491//xylan metabolic process
Unigene0009482	4787	6147	4189	2103	2140	2527	67.55	78.39	69.47	25.23	28.23	29.54	71.8033	27.6667	-1.3759	2.25694e-24	1.44988e-22	AOS1	PREDICTED: allene oxide synthase [Prunus mume]	Metabolism;Metabolism;Metabolism	Global and overview maps;Global and overview maps;Lipid metabolism	ko01100//Metabolic pathways;ko01110//Biosynthesis of secondary metabolites;ko00592//alpha-Linolenic acid metabolism	K01723;K01723;K01723	-	GO:0016491//oxidoreductase activity;GO:0046906//tetrapyrrole binding;GO:0046914//transition metal ion binding	GO:0044710//single-organism metabolic process
Unigene0036064	20	22	22	230	293	258	0.28	0.27	0.36	2.69	3.77	2.94	0.303333	3.13333	3.36872	2.48343e-24	1.5921e-22	--	hypothetical protein TSUD_380590 [Trifolium subterraneum]	Metabolism	Global and overview maps	ko01100//Metabolic pathways	K02350	-	-	-
Unigene0023845	201	167	171	6	0	8	5.69	4.27	5.69	0.14	0	0.19	5.21667	0.11	-5.56755	2.56281e-24	1.63962e-22	GSTF13	PREDICTED: glutathione S-transferase F13-like [Prunus mume]	Metabolism	Metabolism of other amino acids	ko00480//Glutathione metabolism	K00799	-	GO:0003824//catalytic activity	-
Unigene0033136	2148	2676	1900	1026	942	1212	21.54	24.25	22.39	8.75	8.83	10.07	22.7267	9.21667	-1.30207	2.70449e-24	1.72673e-22	At1g64760	PREDICTED: glucan endo-1,3-beta-glucosidase 8-like [Prunus mume]	-	-	-	-	-	GO:0016787//hydrolase activity	GO:0044238//primary metabolic process
Unigene0028586	348	380	305	1326	1349	1219	4.7	4.64	4.84	15.23	17.04	13.64	4.72667	15.3033	1.69495	2.71274e-24	1.72846e-22	HDA8	PREDICTED: histone deacetylase 8 [Prunus mume]	-	-	-	-	-	-	-
Unigene0032216	6808	7121	5699	2403	2358	1936	209.21	197.78	205.84	62.79	67.75	49.28	204.277	59.94	-1.76893	3.15689e-24	2.00736e-22	--	LOW QUALITY PROTEIN: hypothetical protein PRUPE_1G062100 [Prunus persica]	-	-	-	-	-	-	-
Unigene0019101	0	2	0	1217	874	1378	0	0.01	0	6.05	4.78	6.68	0.00333333	5.83667	10.774	3.38676e-24	2.14914e-22	PHO1;H3	PREDICTED: phosphate transporter PHO1 homolog 3-like isoform X1 [Prunus mume]	-	-	-	-	-	-	-
Unigene0024109	15	18	7	219	218	201	0.46	0.49	0.25	5.65	6.18	5.05	0.4	5.62667	3.81421	3.67914e-24	2.32995e-22	TTM3	PREDICTED: triphosphate tunel metalloenzyme 3-like [Prunus mume]	-	-	-	-	-	-	-
Unigene0032376	240	389	225	2	2	0	2.95	4.32	3.25	0.02	0.02	0	3.50667	0.0133333	-8.03892	3.89547e-24	2.46195e-22	UGT85A24	PREDICTED: 7-deoxyloganetin glucosyltransferase-like [Fragaria vesca subsp. vesca] [Fragaria vesca]	Metabolism;Metabolism	Global and overview maps;Global and overview maps	ko01100//Metabolic pathways;ko01110//Biosynthesis of secondary metabolites	K21374;K21374	-	-	-
Unigene0026703	258	210	243	1111	1260	1325	9.6	7.06	10.63	35.15	43.83	40.83	9.09667	39.9367	2.1343	4.02758e-24	2.5403e-22	--	hypothetical protein PRUPE_5G125600 [Prunus persica]	-	-	-	-	-	-	-
Unigene0036056	196	94	153	1891	1689	4769	3.25	1.41	2.98	26.68	26.21	65.55	2.54667	39.48	3.95444	5.34495e-24	3.36441e-22	At4g06744	PREDICTED: uncharacterized protein At4g06744-like [Prunus mume]	-	-	-	-	-	-	-
Unigene0030292	0	0	3	551	403	500	0	0	0.02	2.51	2.02	2.22	0.00666667	2.25	8.39874	5.3788e-24	3.3789e-22	RE2	Retrovirus-related Pol polyprotein from transposon TNT 1-94 [Noccaea caerulescens]	-	-	-	-	-	-	-
Unigene0000697	1991	2599	1937	2	8	0	20.03	23.63	22.9	0.02	0.08	0	22.1867	0.0333333	-9.37851	5.57217e-24	3.49335e-22	Os03g0733400	PREDICTED: zinc finger BED domain-containing protein RICESLEEPER 2-like [Fragaria vesca subsp. vesca] [Fragaria vesca]	-	-	-	-	-	-	-
Unigene0018239	55	50	45	416	546	391	1.33	1.09	1.28	8.53	12.31	7.81	1.23333	9.55	2.95294	5.63788e-24	3.52746e-22	At3g16150	PREDICTED: probable isoaspartyl peptidase/L-asparaginase 2 [Pyrus x bretschneideri]	-	-	-	-	-	GO:0003824//catalytic activity	-
Unigene0028111	5741	7286	4944	16297	17226	18015	160.5	184.1	162.45	387.41	450.25	417.17	169.017	418.277	1.30729	5.78122e-24	3.60991e-22	--	hypothetical protein PRUPE_ppa012051mg [Prunus persica]	-	-	-	-	-	-	-
Unigene0000081	29	33	25	255	329	282	0.63	0.65	0.64	4.7	6.67	5.06	0.64	5.47667	3.09715	5.94868e-24	3.70706e-22	--	hypothetical protein PRUPE_ppa014025mg [Prunus persica]	-	-	-	-	-	-	-
Unigene0035675	736	761	560	240	224	212	7.66	7.16	6.85	2.12	2.18	1.83	7.22333	2.04333	-1.82174	6.15741e-24	3.82949e-22	NT5DC3	PREDICTED: 5'-nucleotidase domain-containing protein 4-like [Prunus mume]	-	-	-	-	-	GO:0008252//nucleotidase activity	GO:0006796//phosphate-containing compound metabolic process
Unigene0028887	72	180	141	1390	2473	1634	1.29	2.91	2.97	21.16	41.39	24.23	2.39	28.9267	3.59732	6.27916e-24	3.89745e-22	--	DUF1997 domain-containing protein [Cephalotus follicularis]	-	-	-	-	-	-	-
Unigene0017827	296	346	252	1092	1150	1077	2.9	3.06	2.9	9.09	10.52	8.73	2.95333	9.44667	1.67746	6.34315e-24	3.92936e-22	--	PREDICTED: pentatricopeptide repeat-containing protein At5g66520-like [Prunus mume]	-	-	-	-	-	-	-
Unigene0000650	1103	1333	990	388	272	473	7.71	8.42	8.13	2.31	1.78	2.74	8.08667	2.27667	-1.82862	6.64198e-24	4.10632e-22	RF45	PREDICTED: disease resistance protein RPP8-like [Prunus mume]	-	-	-	-	-	-	-
Unigene0000285	671	750	602	0	0	0	22.19	22.42	23.4	0	0	0	22.67	0.001	-14.4685	6.74844e-24	4.1639e-22	--	PREDICTED: regulatory protein NPR3-like [Prunus mume]	Environmental Information Processing	Signal transduction	ko04075//Plant hormone signal transduction	K14508	-	-	-
Unigene0028364	277	255	300	1	0	3	3.34	2.78	4.25	0.01	0	0.03	3.45667	0.0133333	-8.0182	7.61283e-24	4.68797e-22	--	hypothetical protein PRUPE_2G051300 [Prunus persica]	-	-	-	-	-	-	-
Unigene0034554	481	746	339	87	56	102	5.42	7.59	4.49	0.83	0.59	0.95	5.83333	0.79	-2.8844	7.81891e-24	4.8054e-22	HSP70	PREDICTED: heat shock 70 kDa protein isoform X1 [Malus domestica]	Genetic Information Processing;Genetic Information Processing;Cellular Processes	Folding, sorting and degradation;Transcription;Transport and catabolism	ko04141//Protein processing in endoplasmic reticulum;ko03040//Spliceosome;ko04144//Endocytosis	K03283;K03283;K03283	-	GO:0016628//oxidoreductase activity, acting on the CH-CH group of donors, NAD or NADP as acceptor;GO:0032550//purine ribonucleoside binding	GO:0044710//single-organism metabolic process
Unigene0033744	6001	6757	5144	3438	2631	3063	62.25	63.35	62.71	30.32	25.52	26.32	62.77	27.3867	-1.1966	9.74298e-24	5.97614e-22	--	Abhydrolase_6 domain-containing protein [Cephalotus follicularis]	-	-	-	-	-	-	-
Unigene0001927	0	2	0	1187	836	1136	0	0.03	0	14.91	11.55	13.9	0.01	13.4533	10.3937	1.00581e-23	6.15734e-22	UGT78G1	PREDICTED: flavonoid 3-O-glucosyltransferase-like [Prunus mume]	-	-	-	-	-	GO:0016740//transferase activity	-
Unigene0002634	187	202	132	5	0	9	1.72	1.68	1.43	0.04	0	0.07	1.61	0.0366667	-5.45645	1.0217e-23	6.24236e-22	pol	Retrotransposon gag protein [Asparagus officinalis]	-	-	-	-	-	-	-
Unigene0029917	1842	2464	1592	490	620	680	23.85	28.83	24.22	5.39	7.5	7.29	25.6333	6.72667	-1.93006	1.08876e-23	6.63908e-22	RBK2	PREDICTED: receptor-like cytosolic serine/threonine-protein kinase RBK2 isoform X1 [Prunus mume]	-	-	-	-	-	-	-
Unigene0010733	274	566	353	13	35	17	2.67	4.98	4.04	0.11	0.32	0.14	3.89667	0.19	-4.35817	1.4697e-23	8.94452e-22	LECRK71	PREDICTED: L-type lectin-domain containing receptor kinase VII.1 [Prunus mume]	-	-	-	-	-	GO:0004713//protein tyrosine kinase activity;GO:0032550//purine ribonucleoside binding	GO:0006468//protein phosphorylation
Unigene0009870	918	619	604	131	87	66	18.55	11.31	14.35	2.25	1.64	1.1	14.7367	1.66333	-3.14726	1.90086e-23	1.15461e-21	ANNAT8	PREDICTED: annexin-like protein RJ4 isoform X2 [Prunus mume]	-	-	-	-	-	-	-
Unigene0008110	2	9	5	198	223	179	0.06	0.25	0.18	5.13	6.36	4.52	0.163333	5.33667	5.03005	1.94028e-23	1.17626e-21	--	PREDICTED: uncharacterized transmembrane protein DDB_G0289901-like [Prunus mume]	-	-	-	-	-	-	-
Unigene0013743	610	685	567	0	0	0	9.07	9.21	9.91	0	0	0	9.39667	0.001	-13.1979	2.03366e-23	1.23048e-21	--	PREDICTED: ankyrin repeat-containing protein At3g12360-like [Malus domestica]	-	-	-	-	-	-	-
Unigene0009103	677	884	672	171	220	212	9.71	11.46	11.33	2.09	2.95	2.52	10.8333	2.52	-2.10398	2.06697e-23	1.24822e-21	GGP5	PREDICTED: gamma-glutamyl peptidase 5-like isoform X4 [Malus domestica]	-	-	-	-	-	-	-
Unigene0034254	51	31	27	379	270	370	0.47	0.26	0.3	3	2.35	2.85	0.343333	2.73333	2.99298	2.2712e-23	1.36853e-21	CES101	PREDICTED: LOW QUALITY PROTEIN: G-type lectin S-receptor-like serine/threonine-protein kinase CES101 [Prunus mume]	-	-	-	-	-	-	-
Unigene0035027	2396	2814	1976	934	601	1031	24.01	25.48	23.27	7.96	5.63	8.56	24.2533	7.38333	-1.71584	2.27496e-23	1.36853e-21	--	PREDICTED: ankyrin repeat-containing protein At3g12360-like [Prunus mume]	-	-	-	-	-	-	-
Unigene0036502	710	600	643	178	106	122	12.62	9.64	13.43	2.69	1.76	1.8	11.8967	2.08333	-2.51359	2.33505e-23	1.40198e-21	LDHA	PREDICTED: L-lactate dehydrogenase B-like [Prunus mume]	Metabolism;Metabolism;Metabolism;Metabolism;Metabolism;Metabolism	Global and overview maps;Global and overview maps;Carbohydrate metabolism;Amino acid metabolism;Carbohydrate metabolism;Carbohydrate metabolism	ko01100//Metabolic pathways;ko01110//Biosynthesis of secondary metabolites;ko00010//Glycolysis / Gluconeogenesis;ko00270//Cysteine and methionine metabolism;ko00620//Pyruvate metabolism;ko00640//Propanoate metabolism	K00016;K00016;K00016;K00016;K00016;K00016	GO:0016020//membrane;GO:0044444//cytoplasmic part	GO:0004457//lactate dehydrogenase activity	GO:0005975//carbohydrate metabolic process;GO:0006090//pyruvate metabolic process
Unigene0020900	144	191	113	6	1	5	5.11	6.13	4.71	0.18	0.03	0.15	5.31667	0.12	-5.46942	2.39992e-23	1.43815e-21	--	-	-	-	-	-	-	-	-
Unigene0020640	18	29	30	422	224	348	0.22	0.32	0.43	4.34	2.53	3.49	0.323333	3.45333	3.4169	2.46249e-23	1.47282e-21	CER1	PREDICTED: protein ECERIFERUM 1-like [Prunus mume]	Metabolism;Metabolism	Global and overview maps;Lipid metabolism	ko01110//Biosynthesis of secondary metabolites;ko00073//Cutin, suberine and wax biosynthesis	K15404;K15404	-	-	-
Unigene0022054	193	255	192	27	16	36	2.97	3.54	3.47	0.35	0.23	0.46	3.32667	0.346667	-3.26246	2.54417e-23	1.51877e-21	--	-	-	-	-	-	-	-	-
Unigene0027238	212	328	219	2	2	0	7.19	10.06	8.73	0.06	0.06	0	8.66	0.04	-7.75822	2.74391e-23	1.63488e-21	--	-	-	-	-	-	-	-	-
Unigene0026552	983	1389	969	4896	3133	5357	6.4	8.17	7.41	27.09	19.06	28.87	7.32667	25.0067	1.77108	2.79344e-23	1.66122e-21	MMT1	PREDICTED: methionine S-methyltransferase [Prunus mume]	Metabolism	Metabolism of other amino acids	ko00450//Selenocompound metabolism	K08247	-	GO:0016741//transferase activity, transferring one-carbon groups;GO:0043168//anion binding	GO:0008152//metabolic process
Unigene0000247	2757	2778	2361	293	68	303	46.11	41.99	46.41	4.17	1.06	4.2	44.8367	3.14333	-3.83431	2.83687e-23	1.68384e-21	--	hypothetical protein PRUPE_4G270200 [Prunus persica]	-	-	-	-	-	-	-
Unigene0024773	4559	4690	3452	2114	1955	2043	73.16	68.02	65.11	28.85	29.33	27.16	68.7633	28.4467	-1.27338	2.8963e-23	1.71585e-21	COL16	PREDICTED: zinc finger protein CONSTANS-LIKE 6-like [Pyrus x bretschneideri]	-	-	-	-	-	-	-
Unigene0020258	579	726	519	0	0	0	19.95	22.61	21.02	0	0	0	21.1933	0.001	-14.3713	2.94315e-23	1.74031e-21	--	hypothetical protein PRUPE_1G248100 [Prunus persica]	-	-	-	-	-	-	-
Unigene0035548	271	265	210	40	48	50	7.53	6.66	6.86	0.95	1.25	1.15	7.01667	1.11667	-2.65159	3.05013e-23	1.80015e-21	--	hypothetical protein PRUPE_6G326200 [Prunus persica]	-	-	-	-	-	-	-
Unigene0027070	542	444	322	2089	2515	2115	17.49	12.95	12.21	57.32	75.88	56.53	14.2167	63.2433	2.15333	3.40265e-23	2.00442e-21	--	PREDICTED: putative invertase inhibitor [Prunus mume]	-	-	-	-	-	-	GO:0008152//metabolic process
Unigene0021891	318	336	283	12	30	39	7.64	7.3	8	0.25	0.67	0.78	7.64667	0.566667	-3.75426	3.41536e-23	2.00811e-21	PLSP1	PREDICTED: chloroplast processing peptidase-like [Prunus mume]	Genetic Information Processing	Folding, sorting and degradation	ko03060//Protein export	K03100	GO:0031224//intrinsic component of membrane	GO:0070011//peptidase activity, acting on L-amino acid peptides	-
Unigene0029405	15	25	2	371	471	376	0.12	0.17	0.02	2.43	3.39	2.4	0.103333	2.74	4.7288	3.649e-23	2.14146e-21	LECRK91	PREDICTED: L-type lectin-domain containing receptor kinase IX.1-like [Prunus mume]	-	-	-	-	-	-	-
Unigene0006462	1355	1440	1256	488	500	447	20.5	19.69	22.34	6.28	7.07	5.6	20.8433	6.31667	-1.72235	3.72038e-23	2.17925e-21	KCR1	PREDICTED: very-long-chain 3-oxoacyl-CoA reductase 1-like [Prunus mume]	Metabolism;Metabolism;Metabolism;Metabolism;Metabolism	Global and overview maps;Global and overview maps;Global and overview maps;Lipid metabolism;Lipid metabolism	ko01100//Metabolic pathways;ko01110//Biosynthesis of secondary metabolites;ko01212//Fatty acid metabolism;ko00062//Fatty acid elongation;ko01040//Biosynthesis of unsaturated fatty acids	K10251;K10251;K10251;K10251;K10251	-	-	-
Unigene0018997	4	0	0	347	268	309	0.06	0	0	4.52	3.84	3.93	0.02	4.09667	7.67831	3.7963e-23	2.21956e-21	WAKL1	PREDICTED: wall-associated receptor kinase-like 1 [Prunus mume]	-	-	-	-	-	-	-
Unigene0003880	798	758	622	2264	1833	2138	8.16	7.01	7.48	19.69	17.52	18.11	7.55	18.44	1.28829	3.81246e-23	2.22484e-21	--	hypothetical protein PRUPE_3G196500 [Prunus persica]	-	-	-	-	-	-	-
Unigene0000341	840	973	708	3612	4326	3237	16.08	16.83	15.93	58.78	77.41	51.32	16.28	62.5033	1.94083	4.06548e-23	2.36807e-21	PILS1	PREDICTED: uncharacterized transporter YBR287W-like [Prunus mume]	-	-	-	-	-	-	GO:0044763//single-organism cellular process
Unigene0023937	321	368	286	81	85	93	4.02	4.16	4.21	0.86	0.99	0.96	4.13	0.936667	-2.14053	4.17332e-23	2.42635e-21	CYP750A1	PREDICTED: cytochrome P450 CYP736A12-like [Pyrus x bretschneideri]	-	-	-	-	-	-	-
Unigene0020299	438	498	387	1520	1601	1474	3.58	3.68	3.72	10.56	12.23	9.98	3.66	10.9233	1.5775	4.26001e-23	2.47215e-21	DFR	PREDICTED: dihydroflavonol-4-reductase isoform X1 [Prunus mume]	-	-	-	-	-	GO:0048037//cofactor binding	GO:0003006//developmental process involved in reproduction;GO:0006631//fatty acid metabolic process;GO:0009685//gibberellin metabolic process;GO:0010476//gibberellin mediated signaling pathway
Unigene0025677	832	761	599	2420	1972	2267	7.13	5.9	6.03	17.64	15.8	16.1	6.35333	16.5133	1.37805	5.51604e-23	3.19511e-21	BHLH140	PREDICTED: transcription factor bHLH140 [Prunus mume]	-	-	-	-	-	-	-
Unigene0023516	474	779	399	2245	2142	2660	4.95	7.35	4.9	19.93	20.91	23	5.73333	21.28	1.89205	5.81814e-23	3.36385e-21	--	PREDICTED: uncharacterized protein LOC103343698 [Prunus mume]	-	-	-	-	-	-	-
Unigene0023850	666	655	446	0	0	0	35.37	31.44	27.84	0	0	0	31.55	0.001	-14.9454	6.0776e-23	3.50737e-21	--	-	-	-	-	-	-	-	-
Unigene0029393	307	449	283	2	0	1	5.23	6.91	5.66	0.03	0	0.01	5.93333	0.0133333	-8.79766	6.10902e-23	3.519e-21	--	-	-	-	-	-	-	-	-
Unigene0021855	454	642	493	107	98	163	4.45	5.69	5.68	0.89	0.9	1.32	5.27333	1.03667	-2.34676	6.44072e-23	3.70324e-21	RLM1A	PREDICTED: disease resistance protein RML1A-like isoform X2 [Prunus mume]	-	-	-	-	-	-	-
Unigene0032257	206	263	141	1	3	1	4.33	5	3.49	0.02	0.06	0.02	4.27333	0.0333333	-7.00225	6.90426e-23	3.96246e-21	--	hypothetical protein PRUPE_5G007300 [Prunus persica]	-	-	-	-	-	-	-
Unigene0032862	234	217	261	33	31	29	4.64	3.89	6.08	0.56	0.57	0.48	4.87	0.536667	-3.18182	8.60836e-23	4.9314e-21	FLS	PREDICTED: flavonol synthase/flavanone 3-hydroxylase-like [Prunus mume]	Metabolism;Metabolism;Metabolism	Global and overview maps;Global and overview maps;Biosynthesis of other secondary metabolites	ko01100//Metabolic pathways;ko01110//Biosynthesis of secondary metabolites;ko00941//Flavonoid biosynthesis	K05278;K05278;K05278	-	GO:0016706//oxidoreductase activity, acting on paired donors, with incorporation or reduction of molecular oxygen, 2-oxoglutarate as one donor, and incorporation of one atom each of oxygen into both donors;GO:0043169//cation binding	GO:0051553//flavone biosynthetic process
Unigene0004324	348	342	281	0	1	2	18.44	16.38	17.5	0	0.05	0.09	17.44	0.0466667	-8.54579	8.97169e-23	5.13013e-21	--	PREDICTED: uncharacterized protein LOC107881011 [Prunus mume]	-	-	-	-	-	-	-
Unigene0000035	589	746	574	145	61	136	15.91	18.21	18.22	3.33	1.54	3.04	17.4467	2.63667	-2.72616	9.25529e-23	5.28262e-21	RGA2	PREDICTED: putative disease resistance RPP13-like protein 1, partial [Prunus mume]	-	-	-	-	-	-	-
Unigene0029983	6391	6574	5519	2712	2718	2549	135.83	126.28	137.87	49.01	54.01	44.88	133.327	49.3	-1.43531	1.02978e-22	5.86693e-21	ephA	PREDICTED: bifunctional epoxide hydrolase 2-like [Prunus mume]	-	-	-	-	-	-	-
Unigene0027264	550	1332	841	50	63	129	6.06	13.25	10.88	0.47	0.65	1.18	10.0633	0.766667	-3.71436	1.12239e-22	6.38291e-21	BAT1	PREDICTED: amino-acid permease BAT1-like [Prunus mume]	-	-	-	-	GO:0031224//intrinsic component of membrane	GO:0046943//carboxylic acid transmembrane transporter activity	-
Unigene0023139	0	0	0	652	603	1208	0	0	0	4.59	4.66	8.28	0.001	5.84333	12.5126	1.21216e-22	6.8809e-21	SIRK	PREDICTED: senescence-induced receptor-like serine/threonine-protein kinase isoform X1 [Prunus mume]	-	-	-	-	-	-	-
Unigene0007177	3046	4438	3001	11157	9109	13506	32.4	42.66	37.52	100.91	90.58	118.99	37.5267	103.493	1.46355	1.32284e-22	7.49555e-21	PPCK2	PREDICTED: phosphoenolpyruvate carboxylase kinase 1-like [Prunus mume]	-	-	-	-	-	GO:0004672//protein kinase activity;GO:0032550//purine ribonucleoside binding	GO:0006464//cellular protein modification process;GO:0006796//phosphate-containing compound metabolic process
Unigene0029903	3255	4023	3032	1461	1471	1370	109.64	122.47	120.03	41.84	46.32	38.22	117.38	42.1267	-1.47838	1.42491e-22	8.05924e-21	--	PREDICTED: collagen alpha-1(VIII) chain-like [Nicotiana attenuata]	-	-	-	-	-	-	-
Unigene0036446	67	83	73	618	359	476	2.01	2.25	2.57	15.76	10.07	11.83	2.27667	12.5533	2.46308	1.53182e-22	8.64827e-21	--	PREDICTED: CLAVATA3/ESR (CLE)-related protein TDIF-like [Prunus mume]	-	-	-	-	-	-	-
Unigene0002145	3	4	7	162	154	261	0.06	0.08	0.17	2.86	2.99	4.49	0.103333	3.44667	5.05982	1.55747e-22	8.77724e-21	--	hypothetical protein PRUPE_6G243400 [Prunus persica]	-	-	-	-	-	-	-
Unigene0036070	107	92	82	640	825	572	1.9	1.47	1.71	9.64	13.67	8.39	1.69333	10.5667	2.64158	1.59205e-22	8.95594e-21	WAK5	PREDICTED: wall-associated receptor kinase 5-like [Prunus mume]	-	-	-	-	-	-	-
Unigene0015830	12	13	15	255	221	175	0.3	0.29	0.43	5.35	5.1	3.57	0.34	4.67333	3.78085	1.66499e-22	9.34941e-21	CYCU4-1	PREDICTED: cyclin-U4-1-like [Prunus mume]	-	-	-	-	-	GO:0016772//transferase activity, transferring phosphorus-containing groups;GO:0019900//kinase binding	GO:0006796//phosphate-containing compound metabolic process
Unigene0035473	0	0	0	706	608	716	0	0	0	8.23	7.79	8.13	0.001	8.05	12.9748	1.71021e-22	9.58606e-21	--	PREDICTED: uncharacterized protein LOC103429085 [Malus domestica]	-	-	-	-	-	-	-
Unigene0008349	2429	2759	2082	819	969	881	25.8	26.49	25.99	7.4	9.62	7.75	26.0933	8.25667	-1.66005	1.76682e-22	9.88563e-21	NPF2.10	PREDICTED: protein NRT1/ PTR FAMILY 2.11-like [Prunus mume]	-	-	-	-	-	-	-
Unigene0004163	0	0	0	740	773	625	0	0	0	10.8	12.41	8.89	0.001	10.7	13.3853	1.89033e-22	1.05578e-20	--	PREDICTED: protein ELC-like [Prunus mume]	Cellular Processes	Transport and catabolism	ko04144//Endocytosis	K12183	-	-	-
Unigene0016336	3499	3176	2932	12197	9807	9853	73.07	59.94	71.96	216.57	191.47	170.42	68.3233	192.82	1.4968	1.91752e-22	1.06905e-20	CYC2	PREDICTED: 3-oxo-Delta(4,5)-steroid 5-beta-reductase-like isoform X1 [Prunus mume]	-	-	-	-	-	-	-
Unigene0004099	0	12	5	278	521	311	0	0.22	0.12	4.9	10.09	5.34	0.113333	6.77667	5.90193	2.0092e-22	1.11817e-20	WRKY70	PREDICTED: probable WRKY transcription factor 70 [Prunus mume]	-	-	-	-	-	-	-
Unigene0036053	76371	95868	72149	46010	33223	43343	855.03	970.06	949.41	438.01	347.76	401.95	924.833	395.907	-1.22403	2.24981e-22	1.24985e-20	PPO	PREDICTED: polyphenol oxidase, chloroplastic-like [Prunus mume]	Metabolism;Metabolism;Metabolism;Metabolism	Global and overview maps;Global and overview maps;Amino acid metabolism;Biosynthesis of other secondary metabolites	ko01100//Metabolic pathways;ko01110//Biosynthesis of secondary metabolites;ko00350//Tyrosine metabolism;ko00950//Isoquinoline alkaloid biosynthesis	K00422;K00422;K00422;K00422	-	-	-
Unigene0000277	2110	2390	1902	1111	829	932	22.02	22.54	23.33	9.86	8.09	8.06	22.63	8.67	-1.38413	2.44918e-22	1.35753e-20	INVF	PREDICTED: probable alkaline/neutral invertase F [Prunus mume]	-	-	-	-	-	-	-
Unigene0003608	373	478	383	1427	1598	2200	8.39	9.72	10.13	27.3	33.61	41	9.41333	33.97	1.85148	2.45235e-22	1.35753e-20	--	-	-	-	-	-	-	-	-
Unigene0030464	191	172	198	827	839	1112	2.48	2.02	3.02	9.12	10.17	11.94	2.50667	10.41	2.05413	2.50879e-22	1.38632e-20	JGB	PREDICTED: uncharacterized WD repeat-containing protein alr3466 [Prunus mume]	-	-	-	-	-	GO:0004683//calmodulin-dependent protein kinase activity	GO:0006796//phosphate-containing compound metabolic process
Unigene0010420	12	34	22	314	240	457	0.15	0.38	0.32	3.31	2.78	4.69	0.283333	3.59333	3.66475	2.59351e-22	1.4306e-20	RE2	PREDICTED: uncharacterized mitochondrial protein AtMg00810-like [Prunus mume]	-	-	-	-	-	-	-
Unigene0024015	124	307	175	2	2	8	1.73	3.87	2.87	0.02	0.03	0.09	2.82333	0.0466667	-5.91886	2.66149e-22	1.46551e-20	--	hypothetical protein PRUPE_3G131800 [Prunus persica]	-	-	-	-	-	-	-
Unigene0031889	67	59	41	404	363	333	1.4	1.11	1.01	7.17	7.08	5.75	1.17333	6.66667	2.50635	2.86987e-22	1.57747e-20	TRAF1B	PREDICTED: BTB/POZ and MATH domain-containing protein 3-like [Prunus mume]	-	-	-	-	-	-	-
Unigene0002205	483	608	436	0	0	0	12.71	14.46	13.49	0	0	0	13.5533	0.001	-13.7264	2.89071e-22	1.58613e-20	--	-	-	-	-	-	-	-	-
Unigene0029711	388	571	314	2107	1349	2195	4.74	6.3	4.5	21.87	15.39	22.19	5.18	19.8167	1.93569	2.91702e-22	1.59776e-20	CYP710A11	PREDICTED: cytochrome P450 710A11-like [Malus domestica]	Metabolism;Metabolism;Metabolism	Global and overview maps;Global and overview maps;Lipid metabolism	ko01100//Metabolic pathways;ko01110//Biosynthesis of secondary metabolites;ko00100//Steroid biosynthesis	K09832;K09832;K09832	-	GO:0016491//oxidoreductase activity;GO:0046906//tetrapyrrole binding;GO:0046914//transition metal ion binding	GO:0044710//single-organism metabolic process
Unigene0026290	164	210	117	670	775	928	4.52	5.23	3.79	15.71	19.98	21.19	4.51333	18.96	2.07069	2.95826e-22	1.61751e-20	XTH16	PREDICTED: xyloglucan endotransglucosylase/hydrolase 2-like [Prunus mume]	-	-	-	-	GO:0005576//extracellular region;GO:0030312//external encapsulating structure	GO:0016758//transferase activity, transferring hexosyl groups;GO:0016787//hydrolase activity	GO:0044042//glucan metabolic process;GO:0045229//external encapsulating structure organization
Unigene0021049	16	52	49	595	789	599	0.39	1.13	1.39	12.21	17.8	11.98	0.97	13.9967	3.85095	3.00886e-22	1.6423e-20	--	hypothetical protein PRUPE_ppa025307mg [Prunus persica]	-	-	-	-	-	-	-
Unigene0000545	13	21	7	221	291	218	0.45	0.66	0.28	6.49	9.4	6.24	0.463333	7.37667	3.99285	3.07536e-22	1.67567e-20	--	PREDICTED: disease resistance protein RGA2-like [Prunus mume]	-	-	-	-	-	-	-
Unigene0000062	295	377	244	2	1	0	2.61	3.01	2.53	0.02	0.01	0	2.71667	0.01	-8.08569	3.71947e-22	2.02309e-20	--	PREDICTED: B3 domain-containing protein Os04g0386900-like isoform X1 [Prunus mume]	-	-	-	-	-	-	-
Unigene0013755	1458	1319	1084	6826	8336	5438	17.2	14.07	15.03	68.49	91.96	53.15	15.4333	71.2	2.20583	3.85654e-22	2.094e-20	RABF2A	PREDICTED: ras-related protein RABF2b isoform X1 [Prunus mume]	Cellular Processes;Cellular Processes	Transport and catabolism;Transport and catabolism	ko04144//Endocytosis;ko04145//Phagosome	K07889;K07889	-	GO:0032550//purine ribonucleoside binding	GO:0008104//protein localization;GO:0035556//intracellular signal transduction
Unigene0000435	513	587	424	198	170	213	4.41	4.56	4.28	1.45	1.37	1.52	4.41667	1.44667	-1.61023	4.3281e-22	2.34597e-20	--	PREDICTED: probable RNA helicase SDE3 [Prunus mume]	-	-	-	-	-	-	-
Unigene0032544	4938	4468	3470	13415	10347	12818	33.11	27.08	27.35	76.5	64.87	71.2	29.18	70.8567	1.27992	5.27173e-22	2.85249e-20	SMO1-1	PREDICTED: methylsterol monooxygenase 1-1-like [Prunus mume]	Metabolism;Metabolism;Metabolism	Global and overview maps;Global and overview maps;Lipid metabolism	ko01100//Metabolic pathways;ko01110//Biosynthesis of secondary metabolites;ko00100//Steroid biosynthesis	K14423;K14423;K14423	GO:0031224//intrinsic component of membrane	GO:0003824//catalytic activity;GO:0046914//transition metal ion binding	GO:0006631//fatty acid metabolic process
Unigene0030559	1193	1432	1051	408	354	570	13.87	15.05	14.36	4.03	3.85	5.49	14.4267	4.45667	-1.6947	5.42971e-22	2.93289e-20	ROPGAP3	PREDICTED: LOW QUALITY PROTEIN: rho GTPase-activating protein 3 [Prunus mume]	-	-	-	-	GO:0016020//membrane;GO:0071944//cell periphery	-	GO:0007275//multicellular organism development;GO:0044763//single-organism cellular process;GO:0050794//regulation of cellular process;GO:0050896//response to stimulus
Unigene0030496	2	14	9	200	313	284	0.05	0.35	0.29	4.66	8.01	6.44	0.23	6.37	4.79159	6.02309e-22	3.24779e-20	--	PREDICTED: uncharacterized protein LOC103334454 [Prunus mume]	-	-	-	-	-	-	-
Unigene0026960	8	11	26	310	475	413	0.42	0.52	1.61	13.91	23.43	18.05	0.85	18.4633	4.44106	6.14496e-22	3.30779e-20	--	-	-	-	-	-	-	-	-
Unigene0031559	5957	6722	4413	1966	2262	2020	92.55	94.38	80.58	25.97	32.86	25.99	89.17	28.2733	-1.65712	6.92538e-22	3.72147e-20	CAD1	PREDICTED: probable cinnamyl alcohol dehydrogenase 1 [Prunus mume]	Metabolism;Metabolism;Metabolism	Global and overview maps;Global and overview maps;Biosynthesis of other secondary metabolites	ko01100//Metabolic pathways;ko01110//Biosynthesis of secondary metabolites;ko00940//Phenylpropanoid biosynthesis	K00083;K00083;K00083	-	-	-
Unigene0035129	328	456	355	1233	1130	1442	5.24	6.58	6.66	16.74	16.86	19.07	6.16	17.5567	1.51102	6.97681e-22	3.74266e-20	BBX20	PREDICTED: B-box zinc finger protein 20 [Prunus mume]	-	-	-	-	GO:0043231//intracellular membrane-bounded organelle	GO:0046914//transition metal ion binding	GO:0010468//regulation of gene expression;GO:0034645//cellular macromolecule biosynthetic process
Unigene0034436	1506	1546	1078	609	436	486	12.28	11.4	10.33	4.22	3.32	3.28	11.3367	3.60667	-1.65226	7.09452e-22	3.79928e-20	At5g24080	hypothetical protein PRUPE_ppa026593mg [Prunus persica]	-	-	-	-	-	GO:0004672//protein kinase activity;GO:0005488//binding	GO:0006796//phosphate-containing compound metabolic process
Unigene0025619	270	339	205	52	33	62	1.82	2.06	1.62	0.3	0.21	0.35	1.83333	0.286667	-2.67702	7.28844e-22	3.89645e-20	ABCG36	PREDICTED: ABC transporter G family member 29-like [Prunus mume]	-	-	-	-	-	-	-
Unigene0010522	17	22	16	250	353	218	0.98	1.14	1.08	12.22	18.96	10.38	1.06667	13.8533	3.69905	7.65025e-22	4.08288e-20	--	-	-	-	-	-	-	-	-
Unigene0025618	637	1114	824	150	94	211	2.59	4.1	3.94	0.52	0.36	0.71	3.54333	0.53	-2.74104	8.48357e-22	4.51989e-20	PDR2	PREDICTED: pleiotropic drug resistance protein 2-like [Prunus mume]	-	-	-	-	-	-	-
Unigene0026855	365	532	351	1401	1183	1410	2.64	3.47	2.98	8.6	7.99	8.43	3.03	8.34	1.46073	9.01563e-22	4.79518e-20	FMO1	PREDICTED: probable flavin-containing monooxygenase 1 [Prunus mume]	-	-	-	-	-	GO:0000166//nucleotide binding;GO:0016709//oxidoreductase activity, acting on paired donors, with incorporation or reduction of molecular oxygen, NAD(P)H as one donor, and incorporation of one atom of oxygen	GO:0044710//single-organism metabolic process
Unigene0028398	189	257	180	2	0	2	4.32	5.31	4.84	0.04	0	0.04	4.82333	0.0266667	-7.49885	9.4049e-22	4.99371e-20	--	-	-	-	-	-	-	-	-
Unigene0035575	1219	1085	967	3204	2779	3290	16.88	13.58	15.74	37.73	35.98	37.74	15.4	37.15	1.27043	9.72606e-22	5.15547e-20	CYP76B6	PREDICTED: geraniol 8-hydroxylase-like [Prunus mume]	-	-	-	-	-	-	-
Unigene0021135	7686	6964	5936	1137	1841	1190	647.66	530.37	587.91	81.47	145.04	83.06	588.647	103.19	-2.5121	1.15543e-21	6.11421e-20	--	hypothetical protein PRUPE_3G149600 [Prunus persica]	-	-	-	-	-	-	-
Unigene0003270	430	550	391	0	0	0	2.63	3.03	2.81	0	0	0	2.82333	0.001	-11.4632	1.16841e-21	6.1724e-20	At5g66900	PREDICTED: probable LRR receptor-like serine/threonine-protein kinase At5g48740 isoform X3 [Prunus mume]	Environmental Information Processing	Signal transduction	ko04075//Plant hormone signal transduction	K13415	-	-	-
Unigene0031116	404	442	392	78	78	46	4.69	4.64	5.35	0.77	0.85	0.44	4.89333	0.686667	-2.83314	1.24377e-21	6.55943e-20	--	T4.5 [Malus x robusta]	-	-	-	-	-	-	-
Unigene0018579	214	213	182	30	13	13	4.29	3.86	4.29	0.51	0.24	0.22	4.14667	0.323333	-3.68086	1.36477e-21	7.1854e-20	--	-	-	-	-	-	-	-	-
Unigene0004675	468	530	358	0	0	0	13.38	13.7	12.03	0	0	0	13.0367	0.001	-13.6703	1.37946e-21	7.2487e-20	--	-	-	-	-	-	-	-	-
Unigene0031407	1964	2116	1887	860	828	1041	35.32	34.39	39.89	13.15	13.92	15.51	36.5333	14.1933	-1.364	1.38143e-21	7.2487e-20	dfr1	Folic acid and derivative biosynthetic process isoform 1 [Theobroma cacao]	-	-	-	-	-	-	-
Unigene0000146	395	500	341	19	55	32	8.82	10.09	8.95	0.36	1.15	0.59	9.28667	0.7	-3.72973	1.38841e-21	7.2731e-20	--	PREDICTED: disease resistance protein RPS4 [Prunus mume]	-	-	-	-	-	-	-
Unigene0036711	2193	2234	1869	5252	4407	5160	22.11	20.36	22.15	45.03	41.55	43.1	21.54	43.2267	1.0049	1.43171e-21	7.48735e-20	ERL1	PREDICTED: LRR receptor-like serine/threonine-protein kinase ERL2 [Prunus mume]	Environmental Information Processing	Signal transduction	ko04016//MAPK signaling pathway - plant	K20718	GO:0031224//intrinsic component of membrane	GO:0004672//protein kinase activity;GO:0016787//hydrolase activity;GO:0032550//purine ribonucleoside binding	GO:0006464//cellular protein modification process;GO:0006796//phosphate-containing compound metabolic process
Unigene0015139	1708	2416	1700	7305	4857	7514	7.27	9.29	8.5	26.43	19.32	26.48	8.35333	24.0767	1.52721	1.4373e-21	7.50401e-20	SKI2	PREDICTED: DExH-box ATP-dependent RNA helicase DExH11 isoform X2 [Prunus mume]	Genetic Information Processing	Folding, sorting and degradation	ko03018//RNA degradation	K12599	-	-	-
Unigene0020129	5072	5357	3998	1285	1727	1808	99.06	94.56	91.78	21.34	31.54	29.25	95.1333	27.3767	-1.797	1.46993e-21	7.66153e-20	XTH8	PREDICTED: probable xyloglucan endotransglucosylase/hydrolase protein 8 isoform X2 [Prunus mume]	-	-	-	-	GO:0005576//extracellular region;GO:0030312//external encapsulating structure	GO:0016758//transferase activity, transferring hexosyl groups;GO:0016787//hydrolase activity	GO:0044042//glucan metabolic process;GO:0045229//external encapsulating structure organization
Unigene0009224	1388	1780	1214	5410	6272	5031	16.6	19.24	17.06	55.02	70.13	49.84	17.6333	58.33	1.72593	1.68679e-21	8.77721e-20	fpr1A	PREDICTED: uncharacterized protein LOC103334026 [Prunus mume]	-	-	-	-	-	-	-
Unigene0022397	1135	1798	1022	342	295	218	9.36	13.4	9.91	2.4	2.28	1.49	10.89	2.05667	-2.40462	1.72016e-21	8.93594e-20	FAD7	PREDICTED: omega-3 fatty acid desaturase, chloroplastic-like [Prunus mume]	-	-	-	-	-	-	-
Unigene0026334	200	163	138	14	19	14	12.45	9.17	10.1	0.74	1.11	0.72	10.5733	0.856667	-3.62555	1.75607e-21	9.10737e-20	--	PREDICTED: uncharacterized protein LOC103319292 [Prunus mume]	-	-	-	-	-	-	-
Unigene0026509	33	46	28	264	206	270	0.21	0.27	0.21	1.44	1.23	1.43	0.23	1.36667	2.57096	1.92492e-21	9.96647e-20	NLP2	PREDICTED: LOW QUALITY PROTEIN: protein NLP2 [Prunus mume]	-	-	-	-	-	-	-
Unigene0015034	1130	1394	1020	243	155	376	10.25	11.42	10.87	1.87	1.31	2.82	10.8467	2	-2.43918	2.00658e-21	1.03721e-19	FAO1	hypothetical protein PRUPE_7G102400 [Prunus persica]	-	-	-	-	-	GO:0000166//nucleotide binding;GO:0051540//metal cluster binding	GO:0044710//single-organism metabolic process
Unigene0021383	622	692	485	2068	1799	1740	6.11	6.15	5.6	17.29	16.53	14.17	5.95333	15.9967	1.426	2.01062e-21	1.03758e-19	CRK25	PREDICTED: cysteine-rich receptor-like protein kinase 10 [Prunus mume]	-	-	-	-	-	-	-
Unigene0018864	19	14	12	258	144	304	1.34	0.89	1	15.48	9.5	17.77	1.07667	14.25	3.72632	2.09257e-21	1.07809e-19	--	-	-	-	-	-	-	-	-
Unigene0000008	158	277	125	7	3	0	3.01	4.76	2.8	0.11	0.05	0	3.52333	0.0533333	-6.04576	2.12657e-21	1.0938e-19	--	PREDICTED: LOW QUALITY PROTEIN: putative disease resistance RPP13-like protein 1 [Prunus mume]	-	-	-	-	-	-	-
Unigene0021307	556	677	446	2	0	0	11.68	12.86	11.01	0.04	0	0	11.85	0.0133333	-9.79563	2.14187e-21	1.09986e-19	--	PREDICTED: agamous-like MADS-box protein AGL103 [Tarenaya hassleriana]	-	-	-	-	-	-	-
Unigene0000251	5	1	1	184	167	183	0.11	0.02	0.03	3.45	3.44	3.34	0.0533333	3.41	5.99859	2.24146e-21	1.14911e-19	--	hypothetical protein PRUPE_ppa023496mg, partial [Prunus persica]	-	-	-	-	-	-	-
Unigene0031915	1054	1353	953	378	430	452	7.07	8.2	7.51	2.16	2.7	2.51	7.59333	2.45667	-1.62803	2.24726e-21	1.15019e-19	--	Glycoside hydrolase, family 47 [Corchorus capsularis]	-	-	-	-	-	-	-
Unigene0035187	542	600	507	0	0	2	5.11	5.11	5.62	0	0	0.02	5.28	0.00666667	-9.62936	2.28597e-21	1.16809e-19	ETG1	PREDICTED: mini-chromosome maintenance complex-binding protein-like [Malus domestica]	-	-	-	-	-	-	-
Unigene0032801	456	673	443	2051	2714	2342	11.02	14.7	12.58	42.14	61.31	46.87	12.7667	50.1067	1.97262	2.58588e-21	1.31918e-19	NQR	PREDICTED: NADPH:quinone oxidoreductase-like [Prunus mume]	-	-	-	-	GO:0009532//plastid stroma;GO:0016020//membrane	GO:0016655//oxidoreductase activity, acting on NAD(P)H, quinone or similar compound as acceptor	GO:0002682//regulation of immune system process;GO:0006090//pyruvate metabolic process;GO:0006605//protein targeting;GO:0006952//defense response;GO:0006970//response to osmotic stress;GO:0006996//organelle organization;GO:0009617//response to bacterium;GO:0009620//response to fungus;GO:0009696//salicylic acid metabolic process;GO:0009755//hormone-mediated signaling pathway;GO:0009863//salicylic …
Unigene0029563	21030	24613	19216	8137	3938	6992	338.85	358.43	363.92	111.49	59.32	93.32	353.733	88.0433	-2.00638	3.23436e-21	1.64731e-19	EXPA1	expansin 3 [Prunus salicina]	-	-	-	-	-	-	-
Unigene0000097	48	30	29	330	316	285	1.75	0.99	1.24	10.23	10.77	8.61	1.32667	9.87	2.89524	3.59336e-21	1.82717e-19	--	PREDICTED: uncharacterized transmembrane protein DDB_G0289901-like [Prunus mume]	-	-	-	-	-	-	-
Unigene0007619	474	569	568	98	96	56	15.99	17.35	22.52	2.81	3.03	1.56	18.62	2.46667	-2.91622	3.70838e-21	1.88259e-19	HSP15.7	PREDICTED: 15.7 kDa heat shock protein, peroxisomal [Prunus mume]	Genetic Information Processing	Folding, sorting and degradation	ko04141//Protein processing in endoplasmic reticulum	K13993	GO:0044439//peroxisomal part	-	GO:0000302//response to reactive oxygen species;GO:0009642//response to light intensity;GO:0044267//cellular protein metabolic process
Unigene0010053	111	153	80	583	435	632	1.64	2.04	1.39	7.31	6	7.72	1.69	7.01	2.05239	3.72606e-21	1.88849e-19	ALDH2C4	PREDICTED: aldehyde dehydrogenase family 2 member C4 [Prunus mume]	-	-	-	-	-	GO:0016903//oxidoreductase activity, acting on the aldehyde or oxo group of donors	GO:0044710//single-organism metabolic process
Unigene0020630	145	122	151	2	5	3	2.15	1.63	2.63	0.03	0.07	0.04	2.13667	0.0466667	-5.51683	3.76699e-21	1.90615e-19	PMAT1	PREDICTED: phenolic glucoside malonyltransferase 1-like [Prunus mume]	-	-	-	-	-	-	-
Unigene0020034	1072	1253	1073	6207	3319	6838	6.1	6.45	7.18	30.04	17.66	32.24	6.57667	26.6467	2.01853	4.24168e-21	2.14287e-19	N	PREDICTED: TMV resistance protein N-like [Prunus mume]	-	-	-	-	-	-	-
Unigene0029459	5140	4659	4040	2117	1320	1703	36.49	29.89	33.71	12.78	8.76	10.01	33.3633	10.5167	-1.66559	4.68471e-21	2.36287e-19	NRT2.7	PREDICTED: high affinity nitrate transporter 2.7 [Prunus mume]	Metabolism	Energy metabolism	ko00910//Nitrogen metabolism	K02575	-	-	-
Unigene0001823	883	928	809	330	340	326	10.29	9.78	11.08	3.27	3.71	3.15	10.3833	3.37667	-1.6206	5.10707e-21	2.57174e-19	APA2	PREDICTED: aspartic proteinase-like [Prunus mume]	-	-	-	-	-	GO:0016787//hydrolase activity	GO:0019538//protein metabolic process
Unigene0036693	2	2	1	255	146	262	0.03	0.03	0.02	3.16	1.99	3.17	0.0266667	2.77333	6.70044	5.31336e-21	2.67131e-19	--	PREDICTED: uncharacterized protein LOC103344076, partial [Prunus mume]	-	-	-	-	-	-	-
Unigene0002293	235	286	154	38	35	33	1.96	2.15	1.51	0.27	0.27	0.23	1.87333	0.256667	-2.86764	5.37846e-21	2.69969e-19	EIX1	PREDICTED: LOW QUALITY PROTEIN: LRR receptor-like serine/threonine-protein kinase GSO1 [Prunus mume]	-	-	-	-	-	-	-
Unigene0000725	23636	25948	20716	81945	105900	83600	474.85	471.15	489.17	1399.87	1989.14	1391.18	478.39	1593.4	1.73585	5.42778e-21	2.72008e-19	--	PREDICTED: protein E6 [Prunus mume]	-	-	-	-	-	-	-
Unigene0030374	57	55	42	364	267	295	1.05	0.92	0.91	5.72	4.61	4.51	0.96	4.94667	2.36535	5.85422e-21	2.92908e-19	MYB62	PREDICTED: transcription factor MYB21 [Prunus mume]	Organismal Systems	Environmental adaptation	ko04626//Plant-pathogen interaction	K09422	-	-	-
Unigene0002688	3460	3291	3037	690	1029	995	87.68	75.38	90.46	14.87	24.38	20.89	84.5067	20.0467	-2.0757	5.97264e-21	2.98355e-19	CHI3	chalcone flavonone isomerase [Prunus persica]	Metabolism;Metabolism;Metabolism	Global and overview maps;Global and overview maps;Biosynthesis of other secondary metabolites	ko01100//Metabolic pathways;ko01110//Biosynthesis of secondary metabolites;ko00941//Flavonoid biosynthesis	K01859;K01859;K01859	-	-	-
Unigene0025676	196	188	144	31	24	25	2.88	2.5	2.49	0.39	0.33	0.3	2.62333	0.34	-2.94779	6.12801e-21	3.05627e-19	CYP716B1	PREDICTED: abscisic acid 8'-hydroxylase 3-like [Prunus mume]	-	-	-	-	-	GO:0016491//oxidoreductase activity;GO:0046906//tetrapyrrole binding;GO:0046914//transition metal ion binding	GO:0044710//single-organism metabolic process
Unigene0018716	108	186	130	1	4	4	0.94	1.46	1.33	0.01	0.03	0.03	1.24333	0.0233333	-5.73568	6.6248e-21	3.29877e-19	GLR2.7	PREDICTED: glutamate receptor 2.7-like [Prunus mume]	-	-	-	-	-	-	-
Unigene0027392	0	2	0	677	718	644	0	0.02	0	5.62	6.55	5.21	0.00666667	5.79333	9.76321	6.96065e-21	3.46049e-19	SB62	PREDICTED: 60S ribosomal protein L15-1-like [Prunus mume]	Genetic Information Processing	Translation	ko03010//Ribosome	K02877	-	-	-
Unigene0011974	1038	726	638	3344	4094	5570	20.68	13.07	14.94	56.65	76.26	91.92	16.23	74.9433	2.20714	7.752e-21	3.84778e-19	CML5	PREDICTED: calmodulin-like protein 3 [Prunus mume]	Organismal Systems	Environmental adaptation	ko04626//Plant-pathogen interaction	K13448	-	-	-
Unigene0030359	983	1098	911	2749	2104	2726	8.64	8.72	9.41	20.55	17.29	19.85	8.92333	19.23	1.1077	7.8217e-21	3.87621e-19	LECRKS4	PREDICTED: L-type lectin-domain containing receptor kinase S.4-like [Prunus mume]	-	-	-	-	-	GO:0004674//protein serine/threonine kinase activity;GO:0032550//purine ribonucleoside binding	GO:0006464//cellular protein modification process;GO:0006796//phosphate-containing compound metabolic process;GO:0007049//cell cycle
Unigene0015397	1306	1406	1091	640	514	542	7.55	7.35	7.42	3.15	2.78	2.6	7.44	2.84333	-1.38772	7.94259e-21	3.92988e-19	--	PREDICTED: E3 ubiquitin-protein ligase MARCH2-like [Malus domestica]	-	-	-	-	-	-	-
Unigene0034718	0	0	0	510	486	501	0	0	0	4.44	4.65	4.25	0.001	4.44667	12.1185	8.65579e-21	4.27599e-19	--	PREDICTED: nucleolin-like isoform X3 [Prunus mume]	-	-	-	-	-	-	-
Unigene0026644	876	1181	821	326	239	408	9.11	11.1	10.03	2.88	2.32	3.51	10.08	2.90333	-1.79571	8.67349e-21	4.27796e-19	CSLG2	PREDICTED: cellulose synthase-like protein G2 [Prunus mume]	-	-	-	-	-	GO:0016757//transferase activity, transferring glycosyl groups	-
Unigene0009008	41622	34719	32229	130862	152062	130275	1253.23	944.81	1140.57	3350.45	4280.71	3249.1	1112.87	3626.75	1.70439	9.21751e-21	4.53911e-19	PRUA1	PREDICTED: major allergen Pru av 1 [Prunus mume]	-	-	-	-	-	-	-
Unigene0000741	41	99	80	757	484	928	0.46	1	1.05	7.19	5.05	8.58	0.836667	6.94	3.05221	9.55996e-21	4.70034e-19	--	PREDICTED: endo-1,3;1,4-beta-D-glucanase-like [Prunus mume]	-	-	-	-	-	GO:0052689//carboxylic ester hydrolase activity	-
Unigene0020522	410	408	332	0	0	0	5.55	4.99	5.28	0	0	0	5.27333	0.001	-12.3645	9.74689e-21	4.78471e-19	RE2	Copia protein [Cajanus cajan]	Metabolism;Metabolism	Global and overview maps;Amino acid metabolism	ko01100//Metabolic pathways;ko00270//Cysteine and methionine metabolism	K00558;K00558	-	-	-
Unigene0036286	6	2	7	187	185	150	0.16	0.05	0.22	4.17	4.54	3.26	0.143333	3.99	4.79894	1.0354e-20	5.07475e-19	--	VQ motif-containing protein [Corchorus olitorius]	-	-	-	-	-	-	-
Unigene0028655	762	729	632	0	1	0	25.92	22.41	25.27	0	0.03	0	24.5333	0.01	-11.2605	1.11123e-20	5.4379e-19	--	mercaptopyruvate sulfurtransferase 1 [Brassica rapa subsp. pekinensis] [Brassica rapa]	-	-	-	-	-	-	-
Unigene0027230	5196	4246	3730	1803	1598	1559	97.18	71.77	82	28.67	27.94	24.15	83.65	26.92	-1.63569	1.208e-20	5.9022e-19	SNA-I	PREDICTED: ribosome-inactivating protein alpha-trichosanthin-like [Prunus mume]	-	-	-	-	-	-	-
Unigene0007684	463	532	475	0	2	0	7.64	7.93	9.21	0	0.03	0	8.26	0.01	-9.69	1.24973e-20	6.09652e-19	--	PREDICTED: pre-mRNA-splicing factor cwf16-like [Prunus mume]	-	-	-	-	-	-	-
Unigene0032485	153	203	132	12	9	23	1.59	1.91	1.62	0.11	0.09	0.2	1.70667	0.133333	-3.67807	1.30668e-20	6.36442e-19	POT2	PREDICTED: potassium transporter 2 [Prunus mume]	-	-	-	-	-	-	GO:0034220//ion transmembrane transport
Unigene0001523	431	1050	398	37	17	69	26.15	57.58	28.39	1.91	0.96	3.47	37.3733	2.11333	-4.14442	1.36605e-20	6.64322e-19	--	-	-	-	-	-	-	-	-
Unigene0000487	502	680	465	213	162	183	5.47	6.7	5.96	1.97	1.65	1.65	6.04333	1.75667	-1.7825	1.37143e-20	6.659e-19	APP1	PREDICTED: probable Xaa-Pro aminopeptidase P [Pyrus x bretschneideri]	-	-	-	-	GO:0044464//cell part	GO:0043167//ion binding	GO:0019538//protein metabolic process;GO:0033036//macromolecule localization;GO:0044763//single-organism cellular process;GO:0071702//organic substance transport;GO:1902582//single-organism intracellular transport
Unigene0007157	462	379	355	87	93	71	10.25	7.6	9.26	1.64	1.93	1.3	9.03667	1.62333	-2.47683	1.39122e-20	6.74461e-19	CXE15	PREDICTED: probable carboxylesterase 15 [Prunus mume]	-	-	-	-	-	GO:0003824//catalytic activity	-
Unigene0009946	0	6	6	153	175	219	0	0.22	0.28	5.24	6.59	7.31	0.166667	6.38	5.25852	1.65668e-20	8.01912e-19	--	PREDICTED: uncharacterized protein LOC103949291 [Pyrus x bretschneideri]	Organismal Systems;Environmental Information Processing	Environmental adaptation;Signal transduction	ko04626//Plant-pathogen interaction;ko04016//MAPK signaling pathway - plant	K13424;K13424	-	-	-
Unigene0032868	353	406	342	0	0	0	5.06	5.26	5.76	0	0	0	5.36	0.001	-12.388	1.66875e-20	8.065e-19	RVE1	PREDICTED: LOW QUALITY PROTEIN: protein REVEILLE 1 [Prunus mume]	-	-	-	-	-	-	-
Unigene0004918	4	6	1	129	197	204	0.19	0.26	0.06	5.16	8.66	7.95	0.17	7.25667	5.4157	1.9754e-20	9.53229e-19	--	PREDICTED: non-specific lipid-transfer protein 1-like [Malus domestica]	-	-	-	-	-	-	-
Unigene0000751	455	490	361	143	78	104	3.99	3.88	3.72	1.07	0.64	0.75	3.86333	0.82	-2.23615	2.00256e-20	9.64843e-19	GLY3	hypothetical protein PRUPE_ppa012341mg [Prunus persica]	-	-	-	-	-	GO:0003824//catalytic activity;GO:0046914//transition metal ion binding	-
Unigene0020442	121	125	107	7	8	10	6.22	5.81	6.46	0.31	0.38	0.43	6.16333	0.373333	-4.04517	2.3527e-20	1.1318e-18	UBL5	PREDICTED: ubiquitin-like protein 5 [Setaria italica]	-	-	-	-	-	-	-
Unigene0014783	590	411	685	2	0	0	6.29	3.96	8.58	0.02	0	0	6.27667	0.00666667	-9.87882	2.37644e-20	1.14146e-18	SEOB	PREDICTED: protein SIEVE ELEMENT OCCLUSION B-like [Prunus mume]	-	-	-	-	-	-	-
Unigene0031493	4686	9699	5503	943	618	1631	55.96	104.68	77.24	9.58	6.9	16.13	79.2933	10.87	-2.86685	2.49613e-20	1.19711e-18	MDL1	PREDICTED: (R)-mandelonitrile lyase 1 [Prunus mume]	Metabolism;Metabolism	Global and overview maps;Metabolism of other amino acids	ko01110//Biosynthesis of secondary metabolites;ko00460//Cyanoamino acid metabolism	K08248;K08248	-	-	-
Unigene0033174	436	548	397	0	2	0	5.19	5.89	5.55	0	0.02	0	5.54333	0.00666667	-9.69957	2.83505e-20	1.35756e-18	RE2	Reverse transcriptase, RNA-dependent DNA polymerase [Corchorus capsularis]	-	-	-	-	-	-	-
Unigene0000625	118	147	119	5	2	10	3.59	4.04	4.25	0.13	0.06	0.25	3.96	0.146667	-4.75489	2.8979e-20	1.38426e-18	At1g56130	PREDICTED: probable LRR receptor-like serine/threonine-protein kinase At1g56140 [Malus domestica]	-	-	-	-	-	-	-
Unigene0026735	361	379	272	80	64	111	8.86	8.4	7.84	1.67	1.47	2.26	8.36667	1.8	-2.21666	2.89966e-20	1.38426e-18	CYB561D	PREDICTED: probable transmembrane ascorbate ferrireductase 4 [Prunus mume]	-	-	-	-	GO:0031224//intrinsic component of membrane	GO:0003824//catalytic activity;GO:0043169//cation binding	GO:0044710//single-organism metabolic process
Unigene0030652	562	564	501	33	64	17	4.93	4.47	5.17	0.25	0.52	0.12	4.85667	0.296667	-4.03305	3.16589e-20	1.50874e-18	CRK29	PREDICTED: cysteine-rich receptor-like protein kinase 10 [Prunus mume]	-	-	-	-	-	-	-
Unigene0023135	190	233	147	8	14	2	5.56	6.16	5.06	0.2	0.38	0.05	5.59333	0.21	-4.73525	3.17009e-20	1.50874e-18	VHA-E2	PREDICTED: V-type proton ATPase subunit E2 [Prunus mume]	Metabolism;Metabolism;Cellular Processes	Global and overview maps;Energy metabolism;Transport and catabolism	ko01100//Metabolic pathways;ko00190//Oxidative phosphorylation;ko04145//Phagosome	K02150;K02150;K02150	GO:0016469//proton-transporting two-sector ATPase complex;GO:0031090//organelle membrane	GO:0015078//hydrogen ion transmembrane transporter activity	GO:0015988//energy coupled proton transmembrane transport, against electrochemical gradient
Unigene0022067	222	175	169	14	18	6	3.02	2.15	2.7	0.16	0.23	0.07	2.62333	0.153333	-4.09666	3.59563e-20	1.70866e-18	LSH1	PREDICTED: protein LIGHT-DEPENDENT SHORT HYPOCOTYLS 1 [Prunus mume]	-	-	-	-	-	-	-
Unigene0005448	266	732	346	0	0	0	16.78	41.74	25.66	0	0	0	28.06	0.001	-14.7762	3.8546e-20	1.82617e-18	ORF1	-	-	-	-	-	-	-	-
Unigene0004281	2434	2587	1748	687	787	1009	25.13	24.14	21.21	6.03	7.6	8.63	23.4933	7.42	-1.66276	4.01198e-20	1.89785e-18	PHT1-4	PREDICTED: inorganic phosphate transporter 1-4 [Prunus mume]	-	-	-	-	GO:0031224//intrinsic component of membrane	GO:0005215//transporter activity	GO:0015698//inorganic anion transport;GO:0044763//single-organism cellular process
Unigene0011843	3883	5075	3522	2232	1817	2459	41.79	49.36	44.55	20.42	18.28	21.92	45.2333	20.2067	-1.16255	5.24089e-20	2.47543e-18	At1g06620	PREDICTED: 1-aminocyclopropane-1-carboxylate oxidase homolog 1-like [Prunus mume]	-	-	-	-	-	-	-
Unigene0024414	0	0	0	466	699	382	0	0	0	16.69	27.53	13.33	0.001	19.1833	14.2276	5.61498e-20	2.64812e-18	--	-	-	-	-	-	-	-	-
Unigene0013193	178	250	159	1	6	15	4.34	5.52	4.56	0.02	0.14	0.3	4.80667	0.153333	-4.97029	5.64047e-20	2.65612e-18	--	PREDICTED: disease resistance protein RGA2-like [Malus domestica]	-	-	-	-	-	-	-
Unigene0009243	163	152	80	728	646	662	2.74	2.31	1.58	10.4	10.15	9.22	2.21	9.92333	2.16678	5.73696e-20	2.6975e-18	BAC2	PREDICTED: mitochondrial arginine transporter BAC2-like [Prunus mume]	-	-	-	-	GO:0019866//organelle inner membrane;GO:0031224//intrinsic component of membrane;GO:0043231//intracellular membrane-bounded organelle	GO:0008324//cation transmembrane transporter activity	GO:0003333//amino acid transmembrane transport;GO:0006560//proline metabolic process;GO:0015822//ornithine transport;GO:0043092//L-amino acid import;GO:0050896//response to stimulus;GO:0098655//cation transmembrane transport
Unigene0020549	1579	1780	1324	4624	5697	5169	19.91	20.29	19.62	49.58	67.17	53.99	19.94	56.9133	1.5131	5.78394e-20	2.71549e-18	--	PREDICTED: uncharacterized protein LOC103320494 [Prunus mume]	-	-	-	-	-	-	-
Unigene0014149	23	37	10	240	376	398	0.76	1.11	0.39	6.77	11.66	10.93	0.753333	9.78667	3.69946	6.13302e-20	2.87506e-18	--	PREDICTED: uncharacterized protein LOC103330952 isoform X2 [Prunus mume]	-	-	-	-	-	-	-
Unigene0026464	348	240	243	1556	1267	1207	5.29	3.3	4.34	20.12	18.02	15.21	4.31	17.7833	2.04477	6.16166e-20	2.88415e-18	TGA7	PREDICTED: transcription factor TGA3 isoform X3 [Prunus mume]	Environmental Information Processing	Signal transduction	ko04075//Plant hormone signal transduction	K14431	-	-	-
Unigene0030942	229	319	227	28	48	35	2.45	3.08	2.85	0.25	0.48	0.31	2.79333	0.346667	-3.01037	6.54586e-20	3.05941e-18	ALDP	PREDICTED: fructose-bisphosphate aldolase 1, chloroplastic-like isoform X1 [Prunus mume]	Metabolism;Metabolism;Metabolism;Metabolism;Metabolism;Metabolism;Metabolism;Metabolism	Global and overview maps;Global and overview maps;Global and overview maps;Global and overview maps;Carbohydrate metabolism;Energy metabolism;Carbohydrate metabolism;Carbohydrate metabolism	ko01100//Metabolic pathways;ko01110//Biosynthesis of secondary metabolites;ko01200//Carbon metabolism;ko01230//Biosynthesis of amino acids;ko00010//Glycolysis / Gluconeogenesis;ko00710//Carbon fixation in photosynthetic organisms;ko00030//Pentose phosphate pathway;ko00051//Fructose and mannose metabolism	K01623;K01623;K01623;K01623;K01623;K01623;K01623;K01623	-	GO:0016832//aldehyde-lyase activity	GO:0006090//pyruvate metabolic process
Unigene0026778	114	178	127	0	5	3	1.31	1.85	1.72	0	0.05	0.03	1.62667	0.0266667	-5.93074	6.6705e-20	3.113e-18	--	hypothetical protein PRUPE_3G131800 [Prunus persica]	-	-	-	-	-	-	-
Unigene0036734	753	684	600	2056	1848	1968	9.04	7.42	8.47	20.99	20.75	19.57	8.31	20.4367	1.29824	6.79599e-20	3.16683e-18	Os06g0508700	PREDICTED: probable methionine--tRNA ligase [Prunus mume]	Genetic Information Processing;Metabolism	Translation;Metabolism of other amino acids	ko00970//Aminoacyl-tRNA biosynthesis;ko00450//Selenocompound metabolism	K01874;K01874	GO:0044424//intracellular part	GO:0004812//aminoacyl-tRNA ligase activity;GO:0032550//purine ribonucleoside binding	GO:0006418//tRNA aminoacylation for protein translation
Unigene0005724	1179	1365	943	374	454	456	18.25	19.09	17.15	4.92	6.57	5.85	18.1633	5.78	-1.65189	6.81243e-20	3.16976e-18	UBP13	PREDICTED: MATH domain and coiled-coil domain-containing protein At3g58370-like [Prunus mume]	-	-	-	-	-	-	-
Unigene0032369	697	484	327	2471	2419	3654	14.84	9.31	8.18	44.74	48.15	64.44	10.7767	52.4433	2.28285	7.17815e-20	3.33495e-18	XTH23	PREDICTED: probable xyloglucan endotransglucosylase/hydrolase protein 23 [Prunus mume]	Environmental Information Processing	Signal transduction	ko04075//Plant hormone signal transduction	K14504	GO:0005576//extracellular region;GO:0030312//external encapsulating structure	GO:0016758//transferase activity, transferring hexosyl groups;GO:0016787//hydrolase activity	GO:0044042//glucan metabolic process;GO:0045229//external encapsulating structure organization
Unigene0022869	17	33	25	272	196	228	0.21	0.37	0.37	2.89	2.29	2.36	0.316667	2.51333	2.98857	7.38798e-20	3.42734e-18	--	Protein spinster [Morus notabilis]	-	-	-	-	-	-	GO:0044763//single-organism cellular process
Unigene0023371	322	409	261	0	0	0	8.21	9.43	7.82	0	0	0	8.48667	0.001	-13.051	7.64793e-20	3.54267e-18	RRS1	PREDICTED: TMV resistance protein N-like [Prunus mume]	-	-	-	-	-	-	-
Unigene0021112	212	269	233	5	19	4	4.86	5.57	6.28	0.1	0.41	0.08	5.57	0.196667	-4.82385	8.22169e-20	3.8028e-18	--	PREDICTED: uncharacterized protein LOC103332400 [Prunus mume]	-	-	-	-	-	-	-
Unigene0028831	450	542	337	1255	1131	1403	3.08	3.35	2.71	7.3	7.23	7.95	3.04667	7.49333	1.29838	9.43109e-20	4.35574e-18	Os10g0415600	PREDICTED: acylamino-acid-releasing enzyme-like isoform X2 [Prunus mume]	-	-	-	-	-	-	-
Unigene0028764	0	7	2	153	154	196	0	0.2	0.08	4.22	4.67	5.26	0.0933333	4.71667	5.65923	9.55644e-20	4.40712e-18	--	-	-	-	-	-	-	-	-
Unigene0027273	328	437	335	1166	935	1326	1.31	1.58	1.58	3.97	3.5	4.4	1.49	3.95667	1.40897	9.62157e-20	4.43061e-18	Os03g0144800	PREDICTED: probable xyloglucan galactosyltransferase GT14 [Prunus mume]	-	-	-	-	-	GO:0016740//transferase activity	-
Unigene0035001	0	0	2	568	463	578	0	0	0.03	6.95	6.23	6.89	0.01	6.69	9.38586	9.76558e-20	4.4903e-18	--	PREDICTED: protein AATF isoform X2 [Prunus mume]	-	-	-	-	-	-	-
Unigene0018595	448	435	373	0	2	0	5.54	4.86	5.42	0	0.02	0	5.27333	0.00666667	-9.62753	1.05139e-19	4.82729e-18	CPR1	PREDICTED: F-box/kelch-repeat protein At3g06240-like [Prunus mume]	-	-	-	-	-	-	-
Unigene0023133	209	251	202	1	2	0	4.59	4.98	5.21	0.02	0.04	0	4.92667	0.02	-7.94447	1.11737e-19	5.12266e-18	SDR1	PREDICTED: (+)-neomenthol dehydrogenase-like [Prunus mume]	Metabolism;Metabolism	Global and overview maps;Metabolism of terpenoids and polyketides	ko01110//Biosynthesis of secondary metabolites;ko00902//Monoterpenoid biosynthesis	K15095;K15095	-	-	-
Unigene0008378	258	313	240	983	1290	1136	10.31	11.3	11.27	33.39	48.18	37.59	10.96	39.72	1.85762	1.14091e-19	5.2163e-18	--	-	-	-	-	-	-	-	-
Unigene0031616	1827	1412	1213	445	356	587	17.04	11.9	13.3	3.53	3.1	4.53	14.08	3.72	-1.92027	1.14113e-19	5.2163e-18	NPF7.3	PREDICTED: protein NRT1/ PTR FAMILY 7.3 [Prunus mume]	-	-	-	-	GO:0031224//intrinsic component of membrane	GO:0015103//inorganic anion transmembrane transporter activity;GO:0015291//secondary active transmembrane transporter activity	GO:0000041//transition metal ion transport;GO:0006575//cellular modified amino acid metabolic process;GO:0006595//polyamine metabolic process;GO:0006725//cellular aromatic compound metabolic process;GO:0009267//cellular response to starvation;GO:0009755//hormone-mediated signaling pathway;GO:0015698//inorganic anion transport
Unigene0034047	134	102	98	679	573	515	2.58	1.77	2.22	11.1	10.3	8.2	2.19	9.86667	2.17163	1.14494e-19	5.22604e-18	ALS3	PREDICTED: protein ALUMINUM SENSITIVE 3 [Prunus mume]	-	-	-	-	GO:0031224//intrinsic component of membrane	-	GO:0010038//response to metal ion
Unigene0018226	10016	9449	7648	30474	21680	25114	185.01	157.75	166.04	478.65	374.41	384.25	169.6	412.437	1.28204	1.26066e-19	5.74585e-18	EXL5	PREDICTED: protein EXORDIUM-like 5 [Pyrus x bretschneideri]	-	-	-	-	-	-	-
Unigene0035046	1809	2197	1419	5784	6312	5454	38.83	42.62	35.8	105.57	126.67	96.97	39.0833	109.737	1.48942	1.3378e-19	6.08856e-18	APX2	PREDICTED: L-ascorbate peroxidase 2, cytosolic [Prunus mume]	Metabolism;Metabolism	Metabolism of other amino acids;Carbohydrate metabolism	ko00480//Glutathione metabolism;ko00053//Ascorbate and aldarate metabolism	K00434;K00434	GO:0044444//cytoplasmic part	GO:0004601//peroxidase activity;GO:0043169//cation binding;GO:0046906//tetrapyrrole binding	GO:0000302//response to reactive oxygen species;GO:0009642//response to light intensity;GO:0042743//hydrogen peroxide metabolic process;GO:0044267//cellular protein metabolic process;GO:0044710//single-organism metabolic process
Unigene0000556	831	1108	743	150	80	238	26.56	32.01	27.92	4.08	2.39	6.3	28.83	4.25667	-2.75977	1.438e-19	6.53506e-18	--	-	-	-	-	-	-	-	-
Unigene0009182	3484	4571	3165	1653	1700	2015	55.46	65.77	59.22	22.38	25.3	26.57	60.15	24.75	-1.28114	1.51319e-19	6.86675e-18	SCT	PREDICTED: spermidine sinapoyl-CoA acyltransferase [Prunus mume]	-	-	-	-	-	GO:0016413//O-acetyltransferase activity	GO:0006950//response to stress;GO:0009987//cellular process;GO:1901576//organic substance biosynthetic process
Unigene0026895	288	366	269	0	0	0	3.05	3.5	3.35	0	0	0	3.3	0.001	-11.6883	1.57285e-19	7.12715e-18	FER	PREDICTED: receptor-like protein kinase FERONIA [Prunus mume]	-	-	-	-	-	-	-
Unigene0032860	50	107	74	1058	434	1343	0.5	0.96	0.86	8.94	4.03	11.05	0.773333	8.00667	3.37204	1.60915e-19	7.28105e-18	--	hypothetical protein PRUPE_2G125000 [Prunus persica]	-	-	-	-	-	-	-
Unigene0010540	0	2	2	200	173	282	0	0.03	0.03	2.42	2.3	3.33	0.02	2.68333	7.06788	1.66095e-19	7.50458e-18	--	2OG-FeII_Oxy_2 domain-containing protein [Cephalotus follicularis]	-	-	-	-	-	-	-
Unigene0025613	1601	1550	1378	645	403	660	79.54	69.6	80.47	27.25	18.72	27.16	76.5367	24.3767	-1.65065	1.66658e-19	7.51913e-18	--	-	-	-	-	-	-	-	-
Unigene0012407	580	687	583	169	136	245	5.89	6.31	6.96	1.46	1.29	2.06	6.38667	1.60333	-1.99399	1.68216e-19	7.57845e-18	--	DNA damage-binding protein 2 [Morus notabilis]	-	-	-	-	-	-	-
Unigene0014802	2927	4447	2678	907	1155	1169	59.51	81.71	63.99	15.68	21.95	19.69	68.4033	19.1067	-1.83999	1.81309e-19	8.15657e-18	CDSP32	PREDICTED: thioredoxin-like protein CDSP32, chloroplastic [Prunus mume]	-	-	-	-	GO:0009526//plastid envelope;GO:0009532//plastid stroma	GO:0015036//disulfide oxidoreductase activity	GO:0006950//response to stress;GO:0019725//cellular homeostasis;GO:0044710//single-organism metabolic process
Unigene0026599	150	239	137	0	2	2	2.2	3.16	2.36	0	0.03	0.02	2.57333	0.0166667	-7.27053	1.88973e-19	8.4891e-18	--	hypothetical protein PRUPE_3G133700 [Prunus persica]	-	-	-	-	-	-	-
Unigene0027394	9673	9056	7023	3896	2878	4571	201.99	170.91	172.37	69.18	56.19	79.06	181.757	68.1433	-1.41536	1.92438e-19	8.63232e-18	--	PREDICTED: cold-shock protein CS120-like [Prunus mume]	-	-	-	-	-	-	-
Unigene0016335	138	180	156	882	1368	899	6.47	7.62	8.59	35.14	59.92	34.89	7.56	43.3167	2.51846	1.98192e-19	8.8777e-18	VEP1	PREDICTED: 3-oxo-Delta(4,5)-steroid 5-beta-reductase-like isoform X1 [Prunus mume]	-	-	-	-	-	-	-
Unigene0032178	0	2	2	195	256	214	0	0.04	0.06	4.12	5.95	4.4	0.0333333	4.82333	7.17692	2.08373e-19	9.32034e-18	--	-	-	-	-	-	-	-	-
Unigene0033004	2019	2119	1715	4524	4501	4933	28.99	27.5	28.94	55.23	60.42	58.66	28.4767	58.1033	1.02884	2.12694e-19	9.50005e-18	IMDH2	PREDICTED: 3-isopropylmalate dehydrogenase 2, chloroplastic-like [Prunus mume]	Metabolism;Metabolism;Metabolism;Metabolism;Metabolism;Metabolism	Global and overview maps;Global and overview maps;Global and overview maps;Global and overview maps;Amino acid metabolism;Carbohydrate metabolism	ko01100//Metabolic pathways;ko01110//Biosynthesis of secondary metabolites;ko01230//Biosynthesis of amino acids;ko01210//2-Oxocarboxylic acid metabolism;ko00290//Valine, leucine and isoleucine biosynthesis;ko00660//C5-Branched dibasic acid metabolism	K00052;K00052;K00052;K00052;K00052;K00052	GO:0044424//intracellular part	GO:0000166//nucleotide binding;GO:0016616//oxidoreductase activity, acting on the CH-OH group of donors, NAD or NADP as acceptor;GO:0043169//cation binding	GO:0006551//leucine metabolic process;GO:0008652//cellular amino acid biosynthetic process
Unigene0020225	0	0	2	540	391	723	0	0	0.02	4.26	3.39	5.56	0.00666667	4.40333	9.36741	2.26981e-19	1.01237e-17	N	PREDICTED: leucine-rich repeat receptor-like protein kinase PXL2 [Prunus mume]	-	-	-	-	-	-	-
Unigene0013865	545	624	442	1361	1343	1522	2.67	2.76	2.54	5.67	6.15	6.18	2.65667	6	1.17535	2.47365e-19	1.10171e-17	--	PREDICTED: doublesex- and mab-3-related transcription factor B1-like [Pyrus x bretschneideri]	-	-	-	-	-	-	-
Unigene0000987	535	541	617	0	1	0	6.68	6.11	9.06	0	0.01	0	7.28333	0.00333333	-11.0934	2.7383e-19	1.21784e-17	AFS1	PREDICTED: (E,E)-alpha-farnesene synthase-like isoform X1 [Prunus mume]	Metabolism;Metabolism	Global and overview maps;Metabolism of terpenoids and polyketides	ko01110//Biosynthesis of secondary metabolites;ko00909//Sesquiterpenoid and triterpenoid biosynthesis	K14173;K14173	-	-	-
Unigene0008219	341	319	230	0	0	0	14.17	11.98	11.23	0	0	0	12.46	0.001	-13.605	3.14152e-19	1.39518e-17	--	-	-	-	-	-	-	-	-
Unigene0017012	370	393	272	36	28	78	3.48	3.34	3	0.29	0.25	0.61	3.27333	0.383333	-3.09409	3.19195e-19	1.41557e-17	GPDHC1	PREDICTED: glycerol-3-phosphate dehydrogenase [NAD(+)] GPDHC1, cytosolic [Prunus mume]	Metabolism;Metabolism	Global and overview maps;Lipid metabolism	ko01110//Biosynthesis of secondary metabolites;ko00564//Glycerophospholipid metabolism	K00006;K00006	GO:0044444//cytoplasmic part	GO:0000166//nucleotide binding;GO:0016614//oxidoreductase activity, acting on CH-OH group of donors;GO:0048037//cofactor binding	GO:0006072//glycerol-3-phosphate metabolic process;GO:0044238//primary metabolic process;GO:0044710//single-organism metabolic process;GO:0050896//response to stimulus
Unigene0027490	3	2	4	138	125	142	0.03	0.02	0.05	1.23	1.23	1.24	0.0333333	1.23333	5.20945	3.48597e-19	1.54376e-17	SD113	PREDICTED: G-type lectin S-receptor-like serine/threonine-protein kinase At1g67520 isoform X2 [Prunus mume]	-	-	-	-	-	-	-
Unigene0005336	0	1	0	693	851	644	0	0.04	0	26.56	35.87	24.05	0.0133333	28.8267	11.0782	3.54075e-19	1.5658e-17	nsa2	PREDICTED: ribosome biogenesis protein NSA2 homolog [Prunus mume]	-	-	-	-	-	-	-
Unigene0030745	132	158	112	548	517	490	0.81	0.87	0.81	2.85	2.96	2.48	0.83	2.76333	1.73523	3.78807e-19	1.67281e-17	N	PREDICTED: TMV resistance protein N-like [Prunus mume]	-	-	-	-	-	-	-
Unigene0032918	1003	948	838	363	368	440	20.37	17.4	20.01	6.27	6.99	7.4	19.26	6.88667	-1.48373	3.80075e-19	1.67603e-17	C1	PREDICTED: myb-related protein Zm38-like [Prunus mume]	Organismal Systems	Environmental adaptation	ko04626//Plant-pathogen interaction	K09422	-	-	-
Unigene0000244	676	913	722	265	145	256	6.51	7.95	8.17	2.17	1.31	2.04	7.54333	1.84	-2.0355	4.02965e-19	1.77447e-17	RPM1	PREDICTED: disease resistance protein RPM1-like [Prunus mume]	Organismal Systems	Environmental adaptation	ko04626//Plant-pathogen interaction	K13457	-	-	-
Unigene0027266	265	359	240	0	0	0	2.1	2.57	2.24	0	0	0	2.30333	0.001	-11.1695	4.1515e-19	1.82555e-17	LECRK2	PREDICTED: G-type lectin S-receptor-like serine/threonine-protein kinase RLK1 [Prunus mume]	-	-	-	-	-	GO:0004672//protein kinase activity;GO:0005488//binding	GO:0006796//phosphate-containing compound metabolic process
Unigene0017431	22	22	14	200	449	295	1.04	0.94	0.78	8.06	19.9	11.58	0.92	13.18	3.84057	4.2731e-19	1.87638e-17	--	hypothetical protein PRUPE_1G476100 [Prunus persica]	-	-	-	-	-	-	-
Unigene0026990	295	316	232	0	0	0	7.24	7.01	6.69	0	0	0	6.98	0.001	-12.769	4.54455e-19	1.99253e-17	CDKB1-2	PREDICTED: cell division control protein 2 homolog C [Pyrus x bretschneideri]	-	-	-	-	-	GO:0004672//protein kinase activity;GO:0032550//purine ribonucleoside binding	GO:0006464//cellular protein modification process;GO:0006796//phosphate-containing compound metabolic process
Unigene0011307	179	181	170	902	943	706	7.11	6.5	7.94	30.48	35.04	23.24	7.18333	29.5867	2.04222	4.55037e-19	1.99253e-17	HSP70	PREDICTED: heat shock 70 kDa protein 18-like [Prunus mume]	Genetic Information Processing;Genetic Information Processing;Cellular Processes	Folding, sorting and degradation;Transcription;Transport and catabolism	ko04141//Protein processing in endoplasmic reticulum;ko03040//Spliceosome;ko04144//Endocytosis	K03283;K03283;K03283	-	-	-
Unigene0036006	1545	1123	943	392	218	306	13.86	9.1	9.94	2.99	1.83	2.27	10.9667	2.36333	-2.21423	4.7981e-19	2.09806e-17	IDD7	PREDICTED: protein indeterminate-domain 7 [Prunus mume]	-	-	-	-	-	-	-
Unigene0036983	5	7	9	180	273	147	0.19	0.25	0.41	5.95	9.93	4.74	0.283333	6.87333	4.60044	4.85382e-19	2.11946e-17	--	-	-	-	-	-	-	-	-
Unigene0030770	0	0	0	420	250	572	0	0	0	10.02	6.56	13.29	0.001	9.95667	13.2814	5.16395e-19	2.25173e-17	--	PREDICTED: disease resistance protein RGA2-like [Prunus mume]	-	-	-	-	-	-	-
Unigene0037103	4091	4584	3209	1338	1209	2023	79.38	80.39	73.18	22.08	21.93	32.51	77.65	25.5067	-1.60611	5.34878e-19	2.32907e-17	REM4.1	PREDICTED: myb-like protein F isoform X2 [Pyrus x bretschneideri]	-	-	-	-	-	-	-
Unigene0032833	439	391	348	1195	1103	1227	4.63	3.73	4.31	10.72	10.88	10.72	4.22333	10.7733	1.35101	5.96766e-19	2.59494e-17	--	PREDICTED: myosin heavy chain, striated muscle [Prunus mume]	-	-	-	-	-	-	-
Unigene0020493	151	184	163	30	25	24	6.78	7.47	8.6	1.15	1.05	0.89	7.61667	1.03	-2.88652	6.14926e-19	2.67018e-17	DSC1	PREDICTED: disease resistance protein RPS4 [Prunus mume]	-	-	-	-	-	-	-
Unigene0028014	88	80	80	435	591	477	2.18	1.79	2.33	9.18	13.71	9.8	2.1	10.8967	2.37543	6.20781e-19	2.69186e-17	--	PREDICTED: BON1-associated protein 2-like [Malus domestica]	-	-	-	-	-	-	-
Unigene0014453	18608	20368	15007	47736	34199	50039	156.03	154.36	147.9	340.35	268.1	347.54	152.763	318.663	1.06073	6.23442e-19	2.6975e-17	RFS1	PREDICTED: probable galactinol--sucrose galactosyltransferase 1 [Prunus mume]	Metabolism	Carbohydrate metabolism	ko00052//Galactose metabolism	K06617	-	GO:0008378//galactosyltransferase activity	-
Unigene0000583	416	362	341	1601	1021	1563	3.78	2.97	3.64	12.37	8.68	11.77	3.46333	10.94	1.65938	6.2381e-19	2.6975e-17	MFDR	PREDICTED: NADPH:adrenodoxin oxidoreductase, mitochondrial [Prunus mume]	-	-	-	-	GO:0005739//mitochondrion	-	GO:0044710//single-organism metabolic process
Unigene0027367	594	703	563	202	212	170	10.23	10.95	11.4	2.96	3.42	2.43	10.86	2.93667	-1.88677	6.74178e-19	2.91127e-17	--	PREDICTED: uncharacterized protein LOC103340687 [Prunus mume]	-	-	-	-	-	-	-
Unigene0036427	1	3	0	507	118	463	0.01	0.03	0	4.37	1.12	3.89	0.0133333	3.12667	7.87344	6.7632e-19	2.91649e-17	--	PREDICTED: uncharacterized protein LOC103420404 [Malus domestica]	-	-	-	-	-	-	-
Unigene0027670	245	267	143	2	1	0	5.04	4.97	3.46	0.03	0.02	0	4.49	0.0166667	-8.07361	7.17256e-19	3.08875e-17	--	PREDICTED: putative ABC1 protein At2g40090 [Prunus mume]	-	-	-	-	-	-	-
Unigene0021022	303	355	289	68	64	106	3.75	3.97	4.2	0.72	0.74	1.09	3.97333	0.85	-2.22482	7.25547e-19	3.12015e-17	CYP720B2	PREDICTED: abscisic acid 8'-hydroxylase 3 isoform X2 [Prunus mume]	-	-	-	-	-	GO:0016491//oxidoreductase activity;GO:0046906//tetrapyrrole binding;GO:0046914//transition metal ion binding	GO:0044710//single-organism metabolic process
Unigene0029667	247	229	227	1210	1515	1027	2.43	2.04	2.63	10.14	13.96	8.38	2.36667	10.8267	2.19366	7.35428e-19	3.15829e-17	Tgs1	PREDICTED: trimethylguanosine synthase [Prunus mume]	Genetic Information Processing	Translation	ko03013//RNA transport	K14292	-	-	-
Unigene0017432	475	542	461	195	124	182	9.12	9.41	10.4	3.18	2.23	2.89	9.64333	2.76667	-1.80138	7.3687e-19	3.16014e-17	REV3	PREDICTED: LOW QUALITY PROTEIN: DNA polymerase zeta catalytic subunit-like [Malus domestica]	Metabolism	Global and overview maps	ko01100//Metabolic pathways	K02350	-	GO:0003676//nucleic acid binding;GO:0034061//DNA polymerase activity	GO:0006259//DNA metabolic process
Unigene0024842	5360	5317	4574	15257	13694	12996	61.1	54.78	61.28	147.88	145.94	122.71	59.0533	138.843	1.23337	7.43269e-19	3.18321e-17	GAD1	PREDICTED: glutamate decarboxylase 1 [Prunus mume]	Metabolism;Metabolism;Metabolism;Metabolism;Metabolism;Metabolism	Global and overview maps;Global and overview maps;Amino acid metabolism;Metabolism of other amino acids;Carbohydrate metabolism;Metabolism of other amino acids	ko01100//Metabolic pathways;ko01110//Biosynthesis of secondary metabolites;ko00250//Alanine, aspartate and glutamate metabolism;ko00410//beta-Alanine metabolism;ko00650//Butanoate metabolism;ko00430//Taurine and hypotaurine metabolism	K01580;K01580;K01580;K01580;K01580;K01580	-	GO:0016831//carboxy-lyase activity;GO:0043168//anion binding	GO:0009064//glutamine family amino acid metabolic process
Unigene0034862	267	281	265	0	0	0	4.26	4.05	4.97	0	0	0	4.42667	0.001	-12.112	7.65556e-19	3.27417e-17	--	hypothetical protein PRUPE_ppa017061mg [Prunus persica]	-	-	-	-	-	-	-
Unigene0023503	0	0	2	446	530	469	0	0	0.05	7.92	10.35	8.11	0.0166667	8.79333	9.0433	8.30228e-19	3.5459e-17	ABCG35	PREDICTED: ABC transporter G family member 29-like [Pyrus x bretschneideri]	-	-	-	-	-	GO:0017111//nucleoside-triphosphatase activity;GO:0032550//purine ribonucleoside binding	-
Unigene0031715	0	2	0	478	365	770	0	0.01	0	2.79	2.34	4.37	0.00333333	3.16667	9.89178	9.47776e-19	4.04242e-17	ZMYM1	zinc finger MYM-type protein 1-like [Asparagus officinalis]	-	-	-	-	-	-	-
Unigene0025991	0	2	0	512	407	459	0	0.04	0	8.68	7.59	7.58	0.0133333	7.95	9.21977	1.06633e-18	4.54188e-17	--	PREDICTED: uncharacterized protein LOC107881897 [Prunus mume]	-	-	-	-	-	-	-
Unigene0002372	150	199	120	620	702	636	1.08	1.3	1.02	3.8	4.73	3.79	1.13333	4.10667	1.8574	1.13355e-18	4.8216e-17	At2g26730	PREDICTED: probable inactive receptor kinase At2g26730 [Prunus mume]	-	-	-	-	-	GO:0016301//kinase activity	GO:0006796//phosphate-containing compound metabolic process
Unigene0025855	2291	2582	2153	1370	1128	1461	25.77	26.25	28.46	13.1	11.86	13.61	26.8267	12.8567	-1.06115	1.13529e-18	4.82243e-17	--	PREDICTED: protein NUCLEAR FUSION DEFECTIVE 4-like [Pyrus x bretschneideri]	-	-	-	-	-	-	-
Unigene0007926	18	11	19	198	153	239	0.18	0.1	0.22	1.65	1.4	1.94	0.166667	1.66333	3.31904	1.20805e-18	5.12451e-17	--	hypothetical protein PRUPE_ppa017986mg, partial [Prunus persica]	-	-	-	-	-	-	-
Unigene0034399	2	1	1	212	151	198	0.07	0.03	0.04	6.43	5.03	5.85	0.0466667	5.77	6.95004	1.25376e-18	5.31121e-17	--	PREDICTED: U3 small nucleolar RNA-associated protein 25-like isoform X1 [Malus domestica]	-	-	-	-	-	-	-
Unigene0007050	238	300	241	0	0	0	5.34	6.08	6.35	0	0	0	5.92333	0.001	-12.5322	1.26973e-18	5.37158e-17	CCR2	PREDICTED: cinnamoyl-CoA reductase 2-like isoform X1 [Prunus mume]	-	-	-	-	-	GO:0048037//cofactor binding	-
Unigene0025001	1377	1646	1291	7	10	0	22.63	24.45	24.94	0.1	0.15	0	24.0067	0.0833333	-8.17033	1.27172e-18	5.37272e-17	--	PREDICTED: leucine-rich repeat receptor-like protein kinase PXL2 [Prunus mume]	-	-	-	-	-	-	-
Unigene0000012	974	1539	943	244	110	300	7.84	11.2	8.92	1.67	0.83	2	9.32	1.5	-2.63537	1.2771e-18	5.38815e-17	SD17	PREDICTED: G-type lectin S-receptor-like serine/threonine-protein kinase At4g27290 isoform X1 [Prunus mume]	-	-	-	-	-	-	-
Unigene0008870	13	18	19	174	243	201	0.41	0.51	0.71	4.67	7.18	5.26	0.543333	5.70333	3.3919	1.29878e-18	5.47223e-17	--	PREDICTED: phytosulfokines 3-like [Prunus mume]	-	-	-	-	-	GO:0005102//receptor binding	GO:0044699//single-organism process
Unigene0006337	89	125	76	607	423	432	7.63	9.69	7.66	44.28	33.92	30.69	8.32667	36.2967	2.12403	1.32319e-18	5.56758e-17	--	-	-	-	-	-	-	-	-
Unigene0027500	144	186	111	5	13	15	3.17	3.71	2.88	0.09	0.27	0.27	3.25333	0.21	-3.95346	1.47852e-18	6.21276e-17	--	hypothetical protein PRUPE_5G081700 [Prunus persica]	-	-	-	-	-	-	-
Unigene0000084	247	304	215	0	0	0	5.86	6.52	6	0	0	0	6.12667	0.001	-12.5809	1.5081e-18	6.32853e-17	--	hypothetical protein PRUPE_ppb015759mg, partial [Prunus persica]	-	-	-	-	-	-	-
Unigene0033946	1103	1390	905	327	340	511	27.14	30.92	26.18	6.84	7.82	10.42	28.08	8.36	-1.74797	1.66403e-18	6.9735e-17	CAB40	PREDICTED: chlorophyll a-b binding protein of LHCII type 1-like [Prunus mume]	Metabolism;Metabolism	Global and overview maps;Energy metabolism	ko01100//Metabolic pathways;ko00196//Photosynthesis - antenna proteins	K08912;K08912	-	-	-
Unigene0036755	595	646	444	237	161	233	7.48	7.34	6.56	2.53	1.89	2.43	7.12667	2.28333	-1.64209	1.67406e-18	7.00614e-17	DTX16	PREDICTED: protein DETOXIFICATION 16-like [Prunus mume]	-	-	-	-	GO:0031224//intrinsic component of membrane	GO:0015291//secondary active transmembrane transporter activity	GO:0044763//single-organism cellular process
Unigene0012281	191	265	155	7	9	27	2.41	3.02	2.3	0.08	0.11	0.28	2.57667	0.156667	-4.03974	1.7092e-18	7.14364e-17	ACD6	PREDICTED: protein ACCELERATED CELL DEATH 6-like [Prunus mume]	-	-	-	-	-	-	-
Unigene0033712	273	245	250	0	0	0	3.02	2.45	3.25	0	0	0	2.90667	0.001	-11.5051	1.79739e-18	7.50219e-17	At1g28695	hypothetical protein PRUPE_2G268700 [Prunus persica]	-	-	-	-	-	-	-
Unigene0036963	348	416	274	2	0	0	13.01	14.05	12.04	0.06	0	0	13.0333	0.02	-9.34799	1.81462e-18	7.56398e-17	UGP3	PREDICTED: LOW QUALITY PROTEIN: UTP--glucose-1-phosphate uridylyltransferase 3, chloroplastic-like [Malus domestica]	-	-	-	-	-	-	-
Unigene0031499	3707	3559	2798	1920	1631	1992	35.65	30.93	31.62	15.7	14.66	15.87	32.7333	15.41	-1.08689	1.82977e-18	7.61697e-17	NIK1	PREDICTED: protein NSP-INTERACTING KINASE 1 [Prunus mume]	-	-	-	-	GO:0031224//intrinsic component of membrane	GO:0004672//protein kinase activity;GO:0032550//purine ribonucleoside binding	GO:0006464//cellular protein modification process;GO:0006796//phosphate-containing compound metabolic process
Unigene0030593	183	134	165	2	9	1	2.88	1.91	3.05	0.03	0.13	0.01	2.61333	0.0566667	-5.52725	1.8455e-18	7.6722e-17	--	hypothetical protein PRUPE_7G150100 [Prunus persica]	-	-	-	-	-	-	-
Unigene0003102	0	0	0	360	244	397	0	0	0	2.18	1.63	2.35	0.001	2.05333	11.0038	1.87691e-18	7.79241e-17	PUB1	PREDICTED: nuclear pore complex protein GP210-like [Prunus mume]	Genetic Information Processing	Translation	ko03013//RNA transport	K14314	-	-	-
Unigene0034865	386	458	392	146	131	168	2.56	2.74	3.05	0.82	0.81	0.92	2.78333	0.85	-1.71128	1.88203e-18	7.80332e-17	--	PREDICTED: histone-lysine N-methyltransferase, H3 lysine-79 specific isoform X1 [Ziziphus jujuba]	-	-	-	-	-	-	-
Unigene0017574	325	401	292	0	2	0	2.05	2.29	2.17	0	0.01	0	2.17	0.00333333	-9.34651	1.90269e-18	7.87852e-17	RGA2	PREDICTED: disease resistance protein RGA2-like [Malus domestica]	-	-	-	-	-	-	-
Unigene0014580	71	19	22	2883	3182	10138	2.17	0.52	0.79	74.76	90.72	256.08	1.16	140.52	6.92051	1.90527e-18	7.87874e-17	--	PREDICTED: stigma-specific STIG1-like protein 3 [Pyrus x bretschneideri]	-	-	-	-	-	-	-
Unigene0029262	239	252	281	0	0	0	2.44	2.33	3.37	0	0	0	2.71333	0.001	-11.4059	2.23524e-18	9.21881e-17	At5g63020	PREDICTED: probable disease resistance protein At5g63020 [Pyrus x bretschneideri]	Organismal Systems	Environmental adaptation	ko04626//Plant-pathogen interaction	K13459	-	-	-
Unigene0011384	195	183	139	776	744	628	2.36	2.01	1.98	8	8.43	6.31	2.11667	7.58	1.8404	2.23963e-18	9.22473e-17	LRK10	PREDICTED: rust resistance kinase Lr10-like isoform X1 [Prunus mume]	-	-	-	-	-	-	-
Unigene0025876	0	4	0	394	124	422	0	0.03	0	2.88	1	3.01	0.01	2.29667	7.8434	2.35102e-18	9.67076e-17	KIN7O	PREDICTED: kinesin-like protein KIN-7O isoform X2 [Ipomoea nil]	-	-	-	-	-	-	-
Unigene0022859	344	465	284	105	93	131	2.97	3.63	2.88	0.77	0.75	0.94	3.16	0.82	-1.94623	2.42516e-18	9.96261e-17	GLR2.8	PREDICTED: glutamate receptor 2.8-like [Prunus mume]	-	-	-	-	-	-	-
Unigene0014770	345	231	221	0	0	0	24.2	14.64	18.22	0	0	0	19.02	0.001	-14.2152	2.50695e-18	1.02851e-16	--	Calcium-binding EF-hand [Corchorus olitorius]	-	-	-	-	-	-	-
Unigene0006773	7	3	1	221	98	290	0.42	0.16	0.07	11.37	5.55	14.54	0.216667	10.4867	5.59694	2.64913e-18	1.08541e-16	--	hypothetical protein PRUPE_ppa015836mg [Prunus persica]	-	-	-	-	-	-	-
Unigene0000601	216	315	218	0	0	0	2.8	3.69	3.32	0	0	0	3.27	0.001	-11.6751	2.673e-18	1.09376e-16	RGA2	PREDICTED: disease resistance protein RGA2-like [Prunus mume]	-	-	-	-	-	-	-
Unigene0020693	1944	2160	1715	989	616	930	12.91	12.96	13.39	5.58	3.82	5.12	13.0867	4.84	-1.43502	2.80825e-18	1.1476e-16	HD3B	PREDICTED: protein EARLY FLOWERING 3 isoform X2 [Prunus mume]	Organismal Systems	Environmental adaptation	ko04712//Circadian rhythm - plant	K12125	-	-	-
Unigene0010240	2966	3605	2518	1248	719	1335	15.24	16.74	15.2	5.45	3.45	5.68	15.7267	4.86	-1.69418	2.85125e-18	1.16364e-16	RPP13	Disease resistance protein RPM1 [Morus notabilis]	-	-	-	-	-	-	-
Unigene0023395	53	70	33	749	266	773	0.31	0.37	0.22	3.69	1.44	3.71	0.3	2.94667	3.29605	2.972e-18	1.21134e-16	XA21	PREDICTED: probable LRR receptor-like serine/threonine-protein kinase At3g47570 isoform X1 [Prunus mume]	Organismal Systems;Environmental Information Processing	Environmental adaptation;Signal transduction	ko04626//Plant-pathogen interaction;ko04016//MAPK signaling pathway - plant	K13420;K13420	-	-	-
Unigene0000994	219	309	207	0	0	0	2.78	3.55	3.09	0	0	0	3.14	0.001	-11.6165	3.16306e-18	1.28754e-16	--	PREDICTED: signal peptidase complex subunit 3B-like [Prunus mume]	-	-	-	-	-	-	-
Unigene0000265	175	201	121	16	2	6	3.32	3.44	2.7	0.26	0.04	0.09	3.15333	0.13	-4.60029	3.26773e-18	1.32668e-16	DSC1	PREDICTED: TMV resistance protein N-like [Pyrus x bretschneideri]	-	-	-	-	-	-	-
Unigene0018539	21334	26521	18405	7516	9353	10446	493.46	554.41	500.36	147.82	202.26	200.13	516.077	183.403	-1.49257	3.30833e-18	1.34142e-16	CAB8	PREDICTED: chlorophyll a-b binding protein 8, chloroplastic [Prunus mume]	Metabolism	Energy metabolism	ko00196//Photosynthesis - antenna proteins	K08909	GO:0009521//photosystem;GO:0031224//intrinsic component of membrane;GO:0031976//plastid thylakoid;GO:0044434//chloroplast part	GO:0043169//cation binding;GO:0046906//tetrapyrrole binding	GO:0000097//sulfur amino acid biosynthetic process;GO:0006091//generation of precursor metabolites and energy;GO:0006464//cellular protein modification process
Unigene0031092	5996	7530	5313	2481	2815	3299	85.21	96.72	88.75	29.98	37.4	38.83	90.2267	35.4033	-1.34967	3.47048e-18	1.40534e-16	RCA	PREDICTED: ribulose bisphosphate carboxylase/oxygenase activase, chloroplastic isoform X2 [Prunus mume]	-	-	-	-	-	-	-
Unigene0000138	580	637	512	174	131	244	9.43	9.36	9.78	2.41	1.99	3.29	9.52333	2.56333	-1.89345	3.52972e-18	1.42748e-16	RPP2A	PREDICTED: TMV resistance protein N-like [Prunus mume]	-	-	-	-	-	-	-
Unigene0010306	344	349	283	0	0	2	17.72	16.25	17.13	0	0	0.09	17.0333	0.03	-9.14918	3.57966e-18	1.4458e-16	--	hypothetical protein PRUPE_7G083900 [Prunus persica]	-	-	-	-	-	-	-
Unigene0023699	811	827	762	3304	4403	3056	21.46	19.78	23.7	74.36	108.95	67	21.6467	83.4367	1.94654	3.90201e-18	1.57396e-16	--	hypothetical protein PRUPE_3G149400 [Prunus persica]	-	-	-	-	-	-	-
Unigene0005773	429	493	376	1210	1404	1421	15	15.58	15.45	35.98	45.9	41.16	15.3433	41.0133	1.41848	4.00134e-18	1.61195e-16	--	hypothetical protein PRUPE_ppb009453mg [Prunus persica]	-	-	-	-	-	-	-
Unigene0021222	114	102	71	413	352	496	1.19	0.96	0.87	3.65	3.42	4.27	1.00667	3.78	1.9088	4.12546e-18	1.65981e-16	LECRK91	PREDICTED: L-type lectin-domain containing receptor kinase IX.1-like [Pyrus x bretschneideri]	-	-	-	-	-	-	-
Unigene0007072	427	345	263	97	79	82	7.03	5.13	5.09	1.36	1.22	1.12	5.75	1.23333	-2.221	4.35752e-18	1.74866e-16	At5g07800	PREDICTED: flavin-containing monooxygenase FMO GS-OX-like 9 [Prunus mume]	-	-	-	-	-	GO:0000166//nucleotide binding;GO:0016709//oxidoreductase activity, acting on paired donors, with incorporation or reduction of molecular oxygen, NAD(P)H as one donor, and incorporation of one atom of oxygen	GO:0044710//single-organism metabolic process
Unigene0026128	15036	19206	14154	6839	4487	8197	164.03	189.36	181.48	63.44	45.76	74.07	178.29	61.09	-1.54522	5.12767e-18	2.05508e-16	Bp10	PREDICTED: L-ascorbate oxidase homolog [Prunus mume]	-	-	-	-	-	GO:0016682//oxidoreductase activity, acting on diphenols and related substances as donors, oxygen as acceptor	GO:0044710//single-organism metabolic process
Unigene0000800	70	56	52	295	267	346	1.22	0.88	1.07	4.39	4.36	5.01	1.05667	4.58667	2.11793	5.19069e-18	2.07767e-16	--	hypothetical protein PRUPE_1G240600 [Prunus persica]	-	-	-	-	-	-	-
Unigene0028044	290	356	319	2	0	0	1.2	1.33	1.55	0.01	0	0	1.36	0.00333333	-8.67243	5.38416e-18	2.15235e-16	RE1	Retrovirus-related Pol polyprotein from transposon TNT 1-94, partial [Anthurium amnicola]	-	-	-	-	-	-	-
Unigene0014517	1661	2083	1551	989	889	1010	18.4	20.85	20.19	9.31	9.21	9.27	19.8133	9.26333	-1.09687	5.85501e-18	2.33661e-16	UFC	PREDICTED: protein UPSTREAM OF FLC [Prunus mume]	-	-	-	-	-	-	-
Unigene0000086	11	23	14	153	171	208	0.24	0.45	0.36	2.82	3.47	3.74	0.35	3.34333	3.25586	6.01065e-18	2.39361e-16	--	hypothetical protein PRUPE_ppb015759mg, partial [Prunus persica]	-	-	-	-	-	-	-
Unigene0002830	212	204	180	7	22	7	4.23	3.68	4.23	0.12	0.41	0.12	4.04667	0.216667	-4.22318	6.48357e-18	2.57865e-16	FTIP1	PREDICTED: protein QUIRKY-like [Prunus mume]	-	-	-	-	-	-	-
Unigene0025322	41	19	63	673	465	1101	0.88	0.37	1.59	12.28	9.33	19.57	0.946667	13.7267	3.85798	6.53984e-18	2.59771e-16	BCA2	PREDICTED: carbonic anhydrase 2-like [Prunus mume]	Metabolism	Energy metabolism	ko00910//Nitrogen metabolism	K01673	-	GO:0003824//catalytic activity;GO:0046914//transition metal ion binding	GO:0044699//single-organism process
Unigene0032141	0	0	2	343	555	449	0	0	0.05	5.9	10.5	7.52	0.0166667	7.97333	8.90207	6.72496e-18	2.66785e-16	LIMYB	PREDICTED: L10-interacting MYB domain-containing protein-like [Prunus mume]	-	-	-	-	-	-	-
Unigene0027116	0	0	0	270	308	302	0	0	0	5.14	6.44	5.6	0.001	5.72667	12.4835	6.81404e-18	2.69976e-16	WAK3	PREDICTED: wall-associated receptor kinase 2-like [Prunus mume]	-	-	-	-	-	-	-
Unigene0029567	138	197	171	679	541	716	1.28	1.66	1.87	5.37	4.71	5.52	1.60333	5.2	1.69744	6.93986e-18	2.74612e-16	--	PREDICTED: uncharacterized protein LOC103323141 [Prunus mume]	-	-	-	-	-	-	-
Unigene0023813	0	0	0	289	251	308	0	0	0	9.65	9.22	10.02	0.001	9.63	13.2333	7.73881e-18	3.058e-16	--	hypothetical protein PRUPE_3G251300 [Prunus persica]	-	-	-	-	-	-	-
Unigene0015138	49	42	24	244	227	294	1.62	1.26	0.93	6.86	7.02	8.05	1.27	7.31	2.52504	7.74759e-18	3.058e-16	DIR21	PREDICTED: dirigent protein 21 [Prunus mume]	-	-	-	-	-	-	-
Unigene0000359	2	0	0	380	479	395	0.04	0	0	5.86	8.12	5.93	0.0133333	6.63667	8.95928	8.16866e-18	3.22012e-16	RGA2	PREDICTED: disease resistance protein RGA2-like, partial [Prunus mume]	-	-	-	-	-	-	-
Unigene0021134	949	1043	775	463	392	535	17.12	17	16.43	7.1	6.61	7.99	16.85	7.23333	-1.22002	9.74782e-18	3.83779e-16	--	-	-	-	-	-	-	-	-
Unigene0026958	686	679	597	1657	1530	1748	16.54	14.8	16.92	33.97	34.49	34.91	16.0867	34.4567	1.09892	9.86777e-18	3.88012e-16	Os03g0733400	PREDICTED: zinc finger BED domain-containing protein RICESLEEPER 2-like [Prunus mume]	-	-	-	-	-	-	-
Unigene0013381	1881	2302	1634	1095	1010	1116	7.99	8.84	8.16	3.96	4.01	3.93	8.33	3.96667	-1.07039	1.05618e-17	4.14778e-16	KIN7E	PREDICTED: centromere-associated protein E isoform X1 [Prunus mume]	-	-	-	-	GO:0005875//microtubule associated complex;GO:0016020//membrane	GO:0003774//motor activity;GO:0015631//tubulin binding;GO:0032550//purine ribonucleoside binding	GO:0007017//microtubule-based process
Unigene0015227	268	240	165	0	0	0	3.06	2.47	2.21	0	0	0	2.58	0.001	-11.3332	1.16818e-17	4.58186e-16	NPF5.4	PREDICTED: protein NRT1/ PTR FAMILY 5.13-like [Prunus mume]	-	-	-	-	-	-	-
Unigene0027677	633	740	551	295	200	301	9.04	9.56	9.25	3.58	2.67	3.56	9.28333	3.27	-1.50535	1.23528e-17	4.83897e-16	NUDT2	PREDICTED: nudix hydrolase 2 isoform X1 [Pyrus x bretschneideri]	-	-	-	-	-	-	-
Unigene0018142	229	174	198	909	860	810	6.48	4.45	6.58	21.87	22.75	18.98	5.83667	21.2	1.86085	1.32879e-17	5.19876e-16	PMEI9	PREDICTED: 21 kDa protein [Prunus mume]	-	-	-	-	-	GO:0052689//carboxylic ester hydrolase activity	GO:0009892//negative regulation of metabolic process
Unigene0005732	182	316	213	14	34	22	1.6	2.51	2.2	0.1	0.28	0.16	2.10333	0.18	-3.54661	1.342e-17	5.24388e-16	At1g11410	PREDICTED: G-type lectin S-receptor-like serine/threonine-protein kinase At1g11410 [Prunus mume]	-	-	-	-	-	-	-
Unigene0000690	472	514	409	175	163	220	5.09	5.01	5.18	1.6	1.64	1.96	5.09333	1.73333	-1.55506	1.38956e-17	5.42294e-16	NCL	Calcium-binding EF-hand [Corchorus capsularis]	-	-	-	-	GO:0031224//intrinsic component of membrane	-	GO:0044763//single-organism cellular process
Unigene0026858	205	177	150	0	0	3	7.19	5.61	6.18	0	0	0.09	6.32667	0.03	-7.72034	1.45646e-17	5.6769e-16	--	PREDICTED: mitogen-activated protein kinase kinase kinase 3-like [Prunus mume]	-	-	-	-	-	-	-
Unigene0020196	541	647	479	1564	1703	1605	11.22	12.13	11.67	27.58	33.02	27.57	11.6733	29.39	1.33211	1.52813e-17	5.94883e-16	--	PREDICTED: cyclin-dependent protein kinase inhibitor SMR3-like [Jatropha curcas]	-	-	-	-	-	-	-
Unigene0000513	195	240	196	0	0	0	3.41	3.79	4.02	0	0	0	3.74	0.001	-11.8688	1.56383e-17	6.08024e-16	VICTR	PREDICTED: TMV resistance protein N-like [Prunus mume]	-	-	-	-	-	-	-
Unigene0025740	176	259	222	0	0	0	4.34	5.77	6.43	0	0	0	5.51333	0.001	-12.4287	1.61529e-17	6.27252e-16	--	PREDICTED: myosin-6-like [Prunus mume]	-	-	-	-	-	-	-
Unigene0023405	116	111	84	8	7	4	2	1.73	1.7	0.12	0.11	0.06	1.81	0.0966667	-4.22683	1.70747e-17	6.62225e-16	--	hypothetical protein PRUPE_ppa023544mg, partial [Prunus persica]	-	-	-	-	-	-	-
Unigene0000223	219	359	267	73	49	55	8.07	11.96	11.57	2.29	1.69	1.68	10.5333	1.88667	-2.48105	1.74838e-17	6.77247e-16	--	-	-	-	-	-	-	-	-
Unigene0019572	2	4	3	109	245	159	0.07	0.13	0.13	3.42	8.44	4.85	0.11	5.57	5.6621	1.95588e-17	7.56686e-16	--	hypothetical protein PRUPE_ppa018278mg [Prunus persica]	-	-	-	-	-	-	-
Unigene0020296	23	32	10	238	174	351	0.46	0.58	0.23	4.03	3.24	5.79	0.423333	4.35333	3.36225	2.03958e-17	7.88091e-16	--	-	-	-	-	-	-	-	-
Unigene0003180	15	13	7	152	139	140	0.2	0.16	0.11	1.74	1.75	1.56	0.156667	1.68333	3.42555	2.05827e-17	7.94331e-16	--	PREDICTED: B3 domain-containing transcription factor VRN1-like [Pyrus x bretschneideri]	-	-	-	-	-	-	-
Unigene0032750	3434	3822	3088	1978	1326	1916	32.73	32.92	34.59	16.03	11.82	15.13	33.4133	14.3267	-1.22172	2.06994e-17	7.97846e-16	BOP1	PREDICTED: ribosome biogenesis protein BOP1 homolog [Prunus mume]	-	-	-	-	GO:0030684//preribosome;GO:0031981//nuclear lumen;GO:0043232//intracellular non-membrane-bounded organelle	GO:0005488//binding	GO:0000460//maturation of 5.8S rRNA;GO:0010467//gene expression
Unigene0012162	3	7	3	120	98	149	0.16	0.34	0.19	5.43	4.88	6.57	0.23	5.62667	4.61257	2.1489e-17	8.27261e-16	--	-	-	-	-	-	-	-	-
Unigene0024304	7	8	6	124	131	118	0.12	0.13	0.12	1.83	2.13	1.7	0.123333	1.88667	3.9352	2.18673e-17	8.40785e-16	GAT1	PREDICTED: GABA transporter 1-like [Prunus mume]	-	-	-	-	GO:0031224//intrinsic component of membrane	-	-
Unigene0034158	206	141	188	13	7	24	7.83	4.85	8.4	0.42	0.25	0.76	7.02667	0.476667	-3.88179	2.19848e-17	8.44263e-16	--	PREDICTED: serine/arginine repetitive matrix protein 1 [Prunus mume]	-	-	-	-	-	-	-
Unigene0000562	187	265	174	0	0	0	2.71	3.47	2.97	0	0	0	3.05	0.001	-11.5746	2.21512e-17	8.49612e-16	PP7	PREDICTED: serine/threonine-protein phosphatase 7-like [Prunus mume]	-	-	-	-	-	-	-
Unigene0028475	326	462	335	1	0	0	7.18	9.2	8.68	0.02	0	0	8.35333	0.00666667	-10.2912	2.27471e-17	8.71395e-16	DBR	PREDICTED: 2-alkenal reductase (NADP(+)-dependent)-like [Prunus mume]	-	-	-	-	-	GO:0003824//catalytic activity	GO:0044710//single-organism metabolic process
Unigene0008609	330	476	322	1	0	0	3.71	4.83	4.25	0.01	0	0	4.26333	0.00333333	-10.3208	2.27843e-17	8.7175e-16	--	PREDICTED: protein goliath-like [Prunus mume]	-	-	-	-	-	-	-
Unigene0027005	473	479	343	143	71	124	8.99	8.23	7.67	2.31	1.26	1.95	8.29667	1.84	-2.17283	2.30842e-17	8.82143e-16	--	PREDICTED: uncharacterized protein LOC103334711 [Prunus mume]	-	-	-	-	-	-	-
Unigene0033726	167	233	158	36	39	35	10.59	13.36	11.78	1.94	2.31	1.84	11.91	2.03	-2.55262	2.44256e-17	9.32263e-16	--	trypsin-alpha amylase inhibitor, partial [Jatropha curcas]	-	-	-	-	-	-	-
Unigene0029924	3288	3437	2640	1446	1565	1516	77.56	73.27	73.19	29	34.51	29.62	74.6733	31.0433	-1.26631	2.48829e-17	9.4856e-16	SALR	PREDICTED: salutaridine reductase-like [Prunus mume]	Metabolism;Metabolism	Global and overview maps;Metabolism of terpenoids and polyketides	ko01110//Biosynthesis of secondary metabolites;ko00902//Monoterpenoid biosynthesis	K15095;K15095	-	-	-
Unigene0020779	16	2	16	361	449	254	0.22	0.02	0.26	4.18	5.71	2.86	0.166667	4.25	4.67243	2.72846e-17	1.03884e-15	--	PREDICTED: zinc finger protein GIS2-like [Prunus mume]	-	-	-	-	-	-	-
Unigene0018557	304	257	234	66	50	82	3.41	2.6	3.08	0.63	0.52	0.76	3.03	0.636667	-2.25071	2.79344e-17	1.06229e-15	--	Os04g0603800, partial [Oryza sativa Japonica Group]	-	-	-	-	GO:0043231//intracellular membrane-bounded organelle	-	-
Unigene0016066	557	625	433	247	207	223	11.9	12.07	10.87	4.49	4.14	3.95	11.6133	4.19333	-1.46961	2.87765e-17	1.09298e-15	XRCC2	PREDICTED: DNA repair protein XRCC2 homolog [Prunus mume]	Genetic Information Processing	Replication and repair	ko03440//Homologous recombination	K10879	-	-	-
Unigene0035313	238	174	240	0	0	0	8.36	5.52	9.91	0	0	0	7.93	0.001	-12.9531	2.96914e-17	1.12636e-15	--	hypothetical protein PRUPE_ppa018860mg [Prunus persica]	-	-	-	-	-	-	-
Unigene0006656	353	376	289	84	106	86	3.44	3.31	3.31	0.7	0.97	0.69	3.35333	0.786667	-2.09177	3.33115e-17	1.26063e-15	At1g14780	PREDICTED: MACPF domain-containing protein At1g14780 [Prunus mume]	-	-	-	-	-	-	-
Unigene0022511	246	295	213	66	71	61	1.68	1.82	1.71	0.38	0.45	0.35	1.73667	0.393333	-2.1425	3.66086e-17	1.38373e-15	PUB12	PREDICTED: U-box domain-containing protein 43-like [Prunus mume]	-	-	-	-	-	GO:0003824//catalytic activity;GO:0046914//transition metal ion binding	GO:0032446//protein modification by small protein conjugation
Unigene0006139	40	54	28	252	203	340	0.5	0.61	0.41	2.7	2.39	3.54	0.506667	2.87667	2.50529	3.90321e-17	1.47354e-15	ATL13	PREDICTED: RING-H2 finger protein ATL13 [Prunus mume]	-	-	-	-	-	GO:0043169//cation binding	-
Unigene0000507	3	6	4	135	206	114	0.04	0.07	0.06	1.47	2.47	1.21	0.0566667	1.71667	4.92097	4.41886e-17	1.6662e-15	N	PREDICTED: TMV resistance protein N-like [Prunus mume]	-	-	-	-	-	-	-
Unigene0003586	556	704	506	252	160	251	3.12	3.57	3.34	1.2	0.84	1.17	3.34333	1.07	-1.64368	4.60964e-17	1.73604e-15	GLR2.8	PREDICTED: glutamate receptor 2.8-like [Prunus mume]	-	-	-	-	-	-	-
Unigene0024595	0	0	0	232	278	247	0	0	0	7.33	9.65	7.6	0.001	8.19333	13.0002	4.78518e-17	1.79998e-15	--	PREDICTED: protein P21 [Prunus mume]	-	-	-	-	-	-	-
Unigene0000522	27	18	25	244	497	274	0.92	0.56	1.01	7.1	15.9	7.77	0.83	10.2567	3.62731	4.95901e-17	1.86312e-15	--	-	-	-	-	-	-	-	-
Unigene0028690	215	208	154	0	0	0	8.87	7.76	7.47	0	0	0	8.03333	0.001	-12.9718	5.02448e-17	1.88545e-15	--	-	-	-	-	-	-	-	-
Unigene0000373	621	325	333	2591	2471	5609	6.13	2.9	3.86	21.75	22.8	45.86	4.29667	30.1367	2.81023	5.3655e-17	2.011e-15	--	PREDICTED: O-glucosyltransferase rumi homolog [Malus domestica]	Metabolism	Glycan biosynthesis and metabolism	ko00514//Other types of O-glycan biosynthesis	K13667	-	-	-
Unigene0028139	401	330	310	0	1	0	17.39	12.93	15.8	0	0.04	0	15.3733	0.0133333	-10.1712	5.57987e-17	2.08884e-15	--	PREDICTED: heavy metal-associated isoprenylated plant protein 3-like [Prunus mume]	-	-	-	-	-	-	-
Unigene0034905	22136	29466	21205	14355	10026	13120	174.62	210.08	196.61	96.29	73.95	85.73	193.77	85.3233	-1.18333	5.61366e-17	2.09729e-15	BGAL3	PREDICTED: beta-galactosidase 5 [Prunus mume]	-	-	-	-	-	GO:0005488//binding;GO:0015925//galactosidase activity	GO:0044238//primary metabolic process
Unigene0000672	12	12	10	137	152	131	0.68	0.62	0.67	6.61	8.07	6.16	0.656667	6.94667	3.40309	5.61587e-17	2.09729e-15	--	PREDICTED: uncharacterized protein LOC103343208 isoform X1 [Prunus mume]	-	-	-	-	-	-	-
Unigene0024471	198	216	151	0	0	0	2.86	2.82	2.57	0	0	0	2.75	0.001	-11.4252	5.98081e-17	2.23091e-15	N	PREDICTED: TMV resistance protein N-like [Prunus mume]	-	-	-	-	-	-	-
Unigene0000009	0	0	0	388	146	367	0	0	0	1.59	0.66	1.47	0.001	1.24	10.2761	6.1498e-17	2.2912e-15	RE1	OSIGBa0134J07.9 [Oryza sativa Indica Group]	Metabolism;Metabolism;Metabolism;Genetic Information Processing	Global and overview maps;Nucleotide metabolism;Nucleotide metabolism;Transcription	ko01100//Metabolic pathways;ko00230//Purine metabolism;ko00240//Pyrimidine metabolism;ko03020//RNA polymerase	K03006;K03006;K03006;K03006	-	-	-
Unigene0028389	1544	1824	1494	962	781	961	20.51	21.9	23.33	10.87	9.7	10.58	21.9133	10.3833	-1.07754	6.59589e-17	2.45447e-15	SOG1	PREDICTED: NAC domain-containing protein 8 [Prunus mume]	-	-	-	-	GO:0043231//intracellular membrane-bounded organelle	GO:0001071//nucleic acid binding transcription factor activity;GO:0003676//nucleic acid binding	GO:0007126//meiotic nuclear division;GO:0010212//response to ionizing radiation;GO:0010468//regulation of gene expression;GO:0034645//cellular macromolecule biosynthetic process
Unigene0036553	1984	2348	1769	1082	1057	1275	20.18	21.59	21.15	9.36	10.05	10.74	20.9733	10.05	-1.06136	6.69922e-17	2.48996e-15	DOF3.7	PREDICTED: dof zinc finger protein DOF4.6-like [Prunus mume]	-	-	-	-	-	-	-
Unigene0018990	86	180	102	1	1	5	3.76	7.11	5.24	0.04	0.04	0.18	5.37	0.0866667	-5.9533	7.28858e-17	2.70579e-15	--	PREDICTED: TMV resistance protein N-like [Prunus mume]	-	-	-	-	-	-	-
Unigene0015085	169	214	171	0	0	0	6.4	7.32	7.61	0	0	0	7.11	0.001	-12.7956	7.56531e-17	2.80518e-15	At3g59200	PREDICTED: F-box/LRR-repeat protein At3g59200-like [Malus domestica]	-	-	-	-	-	-	-
Unigene0029099	88	107	75	3	3	4	2.42	2.66	2.43	0.07	0.08	0.09	2.50333	0.08	-4.96771	7.74253e-17	2.86749e-15	ATG8C	PREDICTED: autophagy-related protein 8C-like [Prunus mume]	Cellular Processes	Transport and catabolism	ko04136//Autophagy - other eukaryotes	K08341	-	-	-
Unigene0025929	303	265	267	44	9	19	12.72	10.06	13.18	1.57	0.35	0.66	11.9867	0.86	-3.80095	7.81309e-17	2.8902e-15	--	hypothetical protein PRUPE_ppa023353mg, partial [Prunus persica]	-	-	-	-	-	-	-
Unigene0002175	0	2	0	437	233	447	0	0.01	0	2.36	1.38	2.35	0.00333333	2.03	9.2503	8.16957e-17	3.01849e-15	--	reverse transcriptase [Corchorus capsularis]	-	-	-	-	-	-	-
Unigene0003569	2085	2301	1778	913	526	957	12.92	12.89	12.95	4.81	3.05	4.91	12.92	4.25667	-1.60181	8.53584e-17	3.15009e-15	--	PREDICTED: uncharacterized protein LOC103328278 [Prunus mume]	-	-	-	-	-	-	-
Unigene0003663	119	183	82	6	2	0	1.95	2.71	1.58	0.08	0.03	0	2.08	0.0366667	-5.82597	9.20502e-17	3.39303e-15	UGT90A1	PREDICTED: UDP-glycosyltransferase 90A1-like [Prunus mume]	-	-	-	-	-	GO:0016758//transferase activity, transferring hexosyl groups	-
Unigene0000461	180	259	183	14	4	28	1.16	1.51	1.39	0.08	0.02	0.15	1.35333	0.0833333	-4.02148	9.34071e-17	3.43494e-15	N	PREDICTED: TMV resistance protein N-like [Prunus mume]	-	-	-	-	-	-	-
Unigene0020864	447	509	367	165	120	198	5.8	5.97	5.6	1.82	1.46	2.13	5.79	1.80333	-1.6829	9.72038e-17	3.57035e-15	SCPL20	PREDICTED: serine carboxypeptidase-like 20 [Prunus mume]	-	-	-	-	-	GO:0004180//carboxypeptidase activity	GO:0019538//protein metabolic process
Unigene0015019	179	185	178	0	0	0	7.06	6.59	8.25	0	0	0	7.3	0.001	-12.8337	1.00436e-16	3.68475e-15	--	PREDICTED: protein NtpR-like [Prunus mume]	-	-	-	-	-	-	-
Unigene0031869	0	0	0	271	185	239	0	0	0	7.63	5.73	6.56	0.001	6.64	12.697	1.09392e-16	4.00859e-15	--	PREDICTED: V-type proton ATPase subunit a1-like [Prunus mume]	Metabolism;Metabolism;Cellular Processes	Global and overview maps;Energy metabolism;Transport and catabolism	ko01100//Metabolic pathways;ko00190//Oxidative phosphorylation;ko04145//Phagosome	K02154;K02154;K02154	-	-	-
Unigene0027491	1149	1421	998	432	381	625	10.43	11.65	10.64	3.33	3.23	4.7	10.9067	3.75333	-1.53897	1.12989e-16	4.13556e-15	At1g67520	PREDICTED: G-type lectin S-receptor-like serine/threonine-protein kinase At1g67520 isoform X1 [Prunus mume]	-	-	-	-	-	-	-
Unigene0000412	12	14	13	136	116	154	0.66	0.69	0.84	6.33	5.93	6.98	0.73	6.41333	3.13511	1.17176e-16	4.28377e-15	--	calcineurin B-like10 [Zea mays]	-	-	-	-	GO:0016020//membrane;GO:0043231//intracellular membrane-bounded organelle;GO:0044444//cytoplasmic part	-	GO:0044763//single-organism cellular process;GO:0065007//biological regulation
Unigene0023536	211	332	242	0	2	0	19.43	27.63	26.19	0	0.17	0	24.4167	0.0566667	-8.75115	1.2124e-16	4.42718e-15	--	-	-	-	-	-	-	-	-
Unigene0029508	99	110	97	7	9	4	4.51	4.53	5.2	0.27	0.38	0.15	4.74667	0.266667	-4.15381	1.23179e-16	4.49273e-15	--	PREDICTED: splicing factor U2af large subunit B-like isoform X3 [Vigna radiata var. radiata] [Vigna radiata]	-	-	-	-	-	-	-
Unigene0033991	1222	1302	992	337	383	558	11.85	11.41	11.31	2.78	3.47	4.48	11.5233	3.57667	-1.68787	1.29553e-16	4.71971e-15	WAK5	PREDICTED: LOW QUALITY PROTEIN: wall-associated receptor kinase-like 22 [Malus domestica]	-	-	-	-	-	-	-
Unigene0028386	119	123	110	15	14	19	3.68	3.43	3.99	0.39	0.4	0.49	3.7	0.426667	-3.11634	1.36714e-16	4.97477e-15	ChiC	Glyco_hydro_18 domain-containing protein [Cephalotus follicularis]	Metabolism;Metabolism	Global and overview maps;Carbohydrate metabolism	ko01100//Metabolic pathways;ko00520//Amino sugar and nucleotide sugar metabolism	K01183;K01183	-	-	-
Unigene0036978	2	1	3	112	116	147	0.1	0.04	0.17	4.61	5.25	5.89	0.103333	5.25	5.66694	1.39908e-16	5.0829e-15	CYP704C1	PREDICTED: cytochrome P450 704C1-like isoform X2 [Prunus mume]	-	-	-	-	-	-	-
Unigene0004670	111	172	102	3	1	0	4.73	6.62	5.11	0.11	0.04	0	5.48667	0.05	-6.77786	1.40011e-16	5.0829e-15	--	PREDICTED: UPF0481 protein At3g47200-like [Prunus mume]	-	-	-	-	-	-	-
Unigene0025696	144	186	102	13	13	25	1.97	2.29	1.64	0.15	0.17	0.28	1.96667	0.2	-3.29768	1.43652e-16	5.20902e-15	CSLH1	PREDICTED: cellulose synthase-like protein H1 isoform X4 [Malus domestica]	-	-	-	-	-	GO:0016740//transferase activity	-
Unigene0028931	135	154	108	434	404	459	2.33	2.4	2.19	6.37	6.52	6.56	2.30667	6.48333	1.49093	1.45903e-16	5.28451e-15	CXE8	PREDICTED: probable carboxylesterase 8 [Prunus mume]	-	-	-	-	-	-	-
Unigene0012082	0	2	0	373	378	277	0	0.05	0	8.25	9.19	5.97	0.0166667	7.80333	8.87098	1.5174e-16	5.48955e-15	--	hypothetical protein PRUPE_ppb018874mg [Prunus persica]	-	-	-	-	-	-	-
Unigene0029914	350	288	275	1125	1207	1053	5.4	4.02	4.99	14.76	17.41	13.45	4.80333	15.2067	1.6626	1.52564e-16	5.51298e-15	--	DUF1218 domain-containing protein [Cephalotus follicularis]	-	-	-	-	-	-	-
Unigene0029388	770	757	584	2070	1483	1950	5.37	4.77	4.79	12.28	9.67	11.27	4.97667	11.0733	1.15384	1.54427e-16	5.57385e-15	At1g53430	PREDICTED: probable LRR receptor-like serine/threonine-protein kinase At1g53430 isoform X1 [Prunus mume]	-	-	-	-	GO:0031224//intrinsic component of membrane	GO:0004672//protein kinase activity;GO:0032550//purine ribonucleoside binding	GO:0006464//cellular protein modification process;GO:0006796//phosphate-containing compound metabolic process
Unigene0023252	2	7	0	153	203	125	0.04	0.14	0	2.83	4.13	2.25	0.06	3.07	5.67713	1.55075e-16	5.59077e-15	Cmbl	PREDICTED: endo-1,3;1,4-beta-D-glucanase-like isoform X2 [Prunus mume]	-	-	-	-	-	GO:0003824//catalytic activity	-
Unigene0028299	136	145	102	471	439	438	1.69	1.63	1.49	4.97	5.1	4.5	1.60333	4.85667	1.59889	1.55432e-16	5.59718e-15	NANA	PREDICTED: aspartyl protease family protein 2 [Prunus mume]	-	-	-	-	-	-	-
Unigene0028001	334	342	246	1050	1033	913	3.51	3.24	3.03	9.37	10.14	7.94	3.26	9.15	1.4889	1.5978e-16	5.74051e-15	RFI2	Zinc finger, RING-type [Corchorus capsularis]	-	-	-	-	-	-	-
Unigene0024121	711	1114	722	221	265	328	9.25	13.1	11.04	2.44	3.22	3.53	11.13	3.06333	-1.86128	1.6286e-16	5.84443e-15	CCX1	PREDICTED: cation/calcium exchanger 1 [Prunus mume]	-	-	-	-	-	-	-
Unigene0030550	2236	2300	1709	1223	1023	1341	21.47	19.96	19.28	9.98	9.18	10.66	20.2367	9.94	-1.02565	1.64356e-16	5.89136e-15	APRR2	PREDICTED: two-component response regulator-like APRR2 [Prunus mume]	-	-	-	-	GO:0043231//intracellular membrane-bounded organelle	GO:0001071//nucleic acid binding transcription factor activity;GO:0003676//nucleic acid binding;GO:0004871//signal transducer activity	GO:0009755//hormone-mediated signaling pathway;GO:0010468//regulation of gene expression;GO:0034645//cellular macromolecule biosynthetic process;GO:0048511//rhythmic process
Unigene0030362	235	303	201	0	2	0	1.71	1.99	1.72	0	0.01	0	1.80667	0.00333333	-9.08215	1.64812e-16	5.9009e-15	RGA2	hypothetical protein PRUPE_3G100000 [Prunus persica]	-	-	-	-	-	-	-
Unigene0007214	899	710	693	2499	1961	2535	19.89	14.2	18.02	47.01	40.56	46.45	17.37	44.6733	1.36282	1.6547e-16	5.91769e-15	RAP2-3	PREDICTED: ethylene-responsive transcription factor RAP2-3 [Prunus mume]	-	-	-	-	-	-	GO:0009987//cellular process
Unigene0002019	0	0	0	215	225	220	0	0	0	2.18	2.51	2.17	0.001	2.28667	11.159	1.74516e-16	6.23404e-15	At1g51860	PREDICTED: probable LRR receptor-like serine/threonine-protein kinase At1g51860 [Prunus mume]	-	-	-	-	-	-	-
Unigene0027804	217	231	211	52	56	65	3.21	3.08	3.66	0.65	0.77	0.8	3.31667	0.74	-2.16414	1.76186e-16	6.28651e-15	At3g58530	PREDICTED: F-box protein At3g58530 [Prunus mume]	-	-	-	-	-	GO:0003824//catalytic activity	-
Unigene0001582	338	329	253	0	0	1	3.25	2.86	2.86	0	0	0.01	2.99	0.00333333	-9.80896	1.77372e-16	6.32161e-15	--	PREDICTED: ankyrin repeat-containing protein At3g12360-like [Prunus mume]	-	-	-	-	-	-	-
Unigene0008871	783	828	531	1927	2212	2325	7.59	7.25	6.05	15.88	20.04	18.66	6.96333	18.1933	1.38556	1.83695e-16	6.53951e-15	rnaseh2b	PREDICTED: ribonuclease H2 subunit B [Prunus mume]	Genetic Information Processing	Replication and repair	ko03030//DNA replication	K10744	-	-	-
Unigene0014769	6750	7753	5851	3535	3464	3155	68.79	71.41	70.08	30.63	33.01	26.63	70.0933	30.09	-1.21999	1.84622e-16	6.565e-15	GAI	DELLA protein [Prunus salicina]	Environmental Information Processing	Signal transduction	ko04075//Plant hormone signal transduction	K14494	-	-	-
Unigene0001139	1925	2085	1533	966	572	773	27.18	26.61	25.44	11.6	7.55	9.04	26.41	9.39667	-1.49086	1.85658e-16	6.59436e-15	OSCBPY	PREDICTED: beta-amyrin synthase [Prunus mume]	-	-	-	-	-	GO:0016853//isomerase activity	-
Unigene0023687	10425	15179	9887	5751	5474	6642	134.09	176.46	149.47	62.9	65.83	70.76	153.34	66.4967	-1.20538	1.90017e-16	6.73699e-15	TIC55	PREDICTED: LOW QUALITY PROTEIN: protein TIC 55, chloroplastic-like [Malus domestica]	-	-	-	-	GO:0009528//plastid inner membrane;GO:0031224//intrinsic component of membrane	GO:0016703//oxidoreductase activity, acting on single donors with incorporation of molecular oxygen, incorporation of one atom of oxygen (internal monooxygenases or internal mixed function oxidases);GO:0043169//cation binding;GO:0051536//iron-sulfur cluster binding	GO:0006605//protein targeting;GO:0044710//single-organism metabolic process
Unigene0031084	0	0	0	285	157	258	0	0	0	2.47	1.5	2.18	0.001	2.05	11.0014	1.90106e-16	6.73699e-15	--	hypothetical protein PRUPE_ppa019270mg [Prunus persica]	-	-	-	-	-	-	-
Unigene0018567	5476	6662	4884	2500	1236	2241	32.37	35.59	33.93	12.57	6.83	10.97	33.9633	10.1233	-1.74629	1.91323e-16	6.77243e-15	At1g74770	PREDICTED: zinc finger protein BRUTUS-like At1g18910 isoform X1 [Vitis vinifera]	-	-	-	-	-	-	-
Unigene0006570	248	300	236	45	19	12	4.67	5.11	5.22	0.72	0.33	0.19	5	0.413333	-3.59655	1.93115e-16	6.82812e-15	--	PREDICTED: transmembrane protein 45A [Prunus mume]	-	-	-	-	-	-	-
Unigene0032007	0	0	1	632	274	452	0	0	0.03	15.72	7.5	10.95	0.01	11.39	10.1536	1.96024e-16	6.92027e-15	--	PREDICTED: uncharacterized protein LOC107880719 [Prunus mume]	-	-	-	-	-	-	-
Unigene0025853	0	2	0	257	447	377	0	0.07	0	8.71	16.67	12.45	0.0233333	12.61	9.07796	1.96164e-16	6.92027e-15	--	hypothetical protein PRUPE_ppa026607mg, partial [Prunus persica]	-	-	-	-	-	-	-
Unigene0000173	194	179	141	0	0	0	5.95	4.96	5.08	0	0	0	5.33	0.001	-12.3799	1.98536e-16	6.99603e-15	--	PREDICTED: LOW QUALITY PROTEIN: putative disease resistance RPP13-like protein 1 [Prunus mume]	-	-	-	-	-	-	-
Unigene0017342	189	168	156	0	0	0	9.51	7.64	9.22	0	0	0	8.79	0.001	-13.1016	2.01693e-16	7.09929e-15	--	-	-	-	-	-	-	-	-
Unigene0011435	1819	2087	1476	1127	900	1082	17.6	18.25	16.78	9.27	8.14	8.67	17.5433	8.69333	-1.01294	2.0308e-16	7.14005e-15	mnmA	PREDICTED: tRNA-specific 2-thiouridylase MnmA [Prunus mume]	-	-	-	-	-	GO:0016782//transferase activity, transferring sulfur-containing groups	-
Unigene0023441	0	2	0	308	449	298	0	0.15	0	21.17	33.93	19.95	0.05	25.0167	8.96675	2.19593e-16	7.70326e-15	RPL18A	PREDICTED: 60S ribosomal protein L18a-like isoform X1 [Prunus mume]	Genetic Information Processing	Translation	ko03010//Ribosome	K02882	-	-	-
Unigene0002578	461	545	287	1493	1657	1518	7.35	7.86	5.38	20.25	24.71	20.06	6.86333	21.6733	1.65894	2.22951e-16	7.80637e-15	--	PREDICTED: uncharacterized protein LOC103326739 [Prunus mume]	-	-	-	-	-	-	-
Unigene0025628	148	197	168	0	0	0	3.41	4.1	4.55	0	0	0	4.02	0.001	-11.973	2.23032e-16	7.80637e-15	--	PREDICTED: glucan endo-1,3-beta-glucosidase 14-like [Prunus mume]	-	-	-	-	GO:0031224//intrinsic component of membrane	GO:0016798//hydrolase activity, acting on glycosyl bonds	GO:0044238//primary metabolic process
Unigene0033165	104	105	75	362	416	408	1.93	1.76	1.63	5.7	7.2	6.26	1.77333	6.38667	1.8486	2.23513e-16	7.81444e-15	NUDT2	PREDICTED: nudix hydrolase 2 isoform X1 [Prunus mume]	-	-	-	-	-	GO:0003824//catalytic activity	-
Unigene0031796	186	197	153	41	40	50	4.23	4.05	4.09	0.79	0.85	0.94	4.12333	0.86	-2.2614	2.29017e-16	7.99792e-15	SGR9	PREDICTED: LOW QUALITY PROTEIN: E3 ubiquitin-protein ligase SGR9, amyloplastic [Prunus mume]	-	-	-	-	GO:0009536//plastid	GO:0046914//transition metal ion binding	GO:0009606//tropism;GO:0032446//protein modification by small protein conjugation
Unigene0005966	230	454	279	29	2	19	1.24	2.22	1.77	0.13	0.01	0.08	1.74333	0.0733333	-4.57124	2.29887e-16	8.01935e-15	TY3B-G	DNA/RNA polymerases superfamily protein [Theobroma cacao]	-	-	-	-	-	-	GO:0043170//macromolecule metabolic process;GO:0044238//primary metabolic process
Unigene0000865	0	4	0	221	106	275	0	0.02	0	1.09	0.58	1.32	0.00666667	0.996667	7.224	2.32314e-16	8.09495e-15	--	hypothetical protein PRUPE_ppa025021mg, partial [Prunus persica]	-	-	-	-	-	-	-
Unigene0023617	283	251	203	989	1314	976	7.02	5.63	5.92	20.87	30.49	20.06	6.19	23.8067	1.94335	2.35562e-16	8.19897e-15	ERF106	PREDICTED: ethylene-responsive transcription factor ERF106 [Prunus mume]	-	-	-	-	-	-	-
Unigene0032402	691	282	229	2803	3582	5350	8.23	3.03	3.2	28.38	39.87	52.76	4.82	40.3367	3.06499	2.41357e-16	8.39133e-15	UGD5	PREDICTED: UDP-glucose 6-dehydrogenase 5 [Prunus mume]	Metabolism;Metabolism;Metabolism;Metabolism	Global and overview maps;Carbohydrate metabolism;Carbohydrate metabolism;Carbohydrate metabolism	ko01100//Metabolic pathways;ko00520//Amino sugar and nucleotide sugar metabolism;ko00040//Pentose and glucuronate interconversions;ko00053//Ascorbate and aldarate metabolism	K00012;K00012;K00012;K00012	-	GO:0000166//nucleotide binding;GO:0016614//oxidoreductase activity, acting on CH-OH group of donors	GO:0044710//single-organism metabolic process
Unigene0000039	1	0	3	214	110	174	0.03	0	0.09	4.77	2.7	3.78	0.04	3.75	6.55075	2.55434e-16	8.87088e-15	--	hypothetical protein PRUPE_1G203600 [Prunus persica]	-	-	-	-	-	-	-
Unigene0032571	0	0	0	232	190	210	0	0	0	4.59	4.13	4.05	0.001	4.25667	12.0555	2.63275e-16	9.13301e-15	--	-	-	-	-	-	-	-	-
Unigene0016488	0	0	0	232	196	203	0	0	0	23.06	21.42	19.66	0.001	21.38	14.384	2.816e-16	9.75785e-15	MED37D	PREDICTED: heat shock cognate 70 kDa protein-like, partial [Prunus mume]	Genetic Information Processing;Genetic Information Processing;Cellular Processes	Folding, sorting and degradation;Transcription;Transport and catabolism	ko04141//Protein processing in endoplasmic reticulum;ko03040//Spliceosome;ko04144//Endocytosis	K03283;K03283;K03283	-	-	-
Unigene0030390	0	6	0	191	105	194	0	0.1	0	2.91	1.76	2.88	0.0333333	2.51667	6.2384	2.85875e-16	9.89502e-15	At3g28050	PREDICTED: WAT1-related protein At5g40210-like isoform X2 [Prunus mume]	-	-	-	-	GO:0031224//intrinsic component of membrane	GO:0005215//transporter activity	GO:0044763//single-organism cellular process
Unigene0002088	147	194	157	0	0	0	2.95	3.51	3.7	0	0	0	3.38667	0.001	-11.7257	2.89989e-16	1.00263e-14	--	Glycosyl transferase, family 14 [Corchorus capsularis]	-	-	-	-	-	GO:0016757//transferase activity, transferring glycosyl groups	-
Unigene0000226	194	196	121	0	0	0	7.99	7.3	5.86	0	0	0	7.05	0.001	-12.7834	2.96891e-16	1.02536e-14	--	-	-	-	-	-	-	-	-
Unigene0033782	160	272	173	824	655	1122	1.78	2.74	2.27	7.81	6.82	10.36	2.26333	8.33	1.87987	3.08127e-16	1.06299e-14	MLO3	PREDICTED: MLO-like protein 3 [Prunus mume]	-	-	-	-	-	-	-
Unigene0007706	370	390	349	1072	870	1016	5	4.77	5.55	12.33	11	11.38	5.10667	11.57	1.17994	3.11442e-16	1.07324e-14	BCCP1	PREDICTED: biotin carboxyl carrier protein of acetyl-CoA carboxylase, chloroplastic isoform X1 [Prunus mume]	Metabolism;Metabolism;Metabolism;Metabolism;Metabolism;Metabolism;Metabolism	Global and overview maps;Global and overview maps;Global and overview maps;Carbohydrate metabolism;Global and overview maps;Lipid metabolism;Carbohydrate metabolism	ko01100//Metabolic pathways;ko01110//Biosynthesis of secondary metabolites;ko01200//Carbon metabolism;ko00620//Pyruvate metabolism;ko01212//Fatty acid metabolism;ko00061//Fatty acid biosynthesis;ko00640//Propanoate metabolism	K02160;K02160;K02160;K02160;K02160;K02160;K02160	GO:0009536//plastid	-	GO:0006631//fatty acid metabolic process;GO:0008610//lipid biosynthetic process;GO:0016043//cellular component organization;GO:0016049//cell growth;GO:0044283//small molecule biosynthetic process;GO:0048513//animal organ development;GO:0048589//developmental growth;GO:0065007//biological regulation;GO:0071554//cell wall organization or biogenesis
Unigene0026900	0	0	0	219	239	191	0	0	0	5.24	6.28	4.45	0.001	5.32333	12.3781	3.15517e-16	1.08608e-14	--	PREDICTED: ribosomal biogenesis protein LAS1L-like [Prunus mume]	-	-	-	-	-	-	-
Unigene0034367	172	183	133	0	0	0	9.26	8.9	8.41	0	0	0	8.85667	0.001	-13.1125	3.2719e-16	1.12502e-14	--	-	-	-	-	-	-	-	-
Unigene0018600	0	0	0	275	129	365	0	0	0	13.84	7.14	17.89	0.001	12.9567	13.6614	3.48314e-16	1.19634e-14	--	PREDICTED: TMV resistance protein N-like [Prunus mume]	-	-	-	-	-	-	-
Unigene0024641	233	130	149	1045	687	1066	5.35	2.7	4.02	20.41	14.76	20.29	4.02333	18.4867	2.20002	3.49683e-16	1.19972e-14	--	PREDICTED: diacylglycerol kinase theta [Prunus mume]	-	-	-	-	-	GO:0016668//oxidoreductase activity, acting on a sulfur group of donors, NAD(P) as acceptor	GO:0044710//single-organism metabolic process
Unigene0013108	0	0	0	213	171	234	0	0	0	2.32	2.04	2.48	0.001	2.28	11.1548	3.52175e-16	1.20694e-14	RE2	UBN2 domain-containing protein, partial [Cephalotus follicularis]	-	-	-	-	-	-	-
Unigene0006383	1089	1663	884	380	364	522	18.44	25.46	17.6	5.47	5.76	7.32	20.5	6.18333	-1.72917	3.53755e-16	1.21103e-14	At3g26430	PREDICTED: esterase-like [Prunus mume]	-	-	-	-	-	-	-
Unigene0027568	158	237	134	11	0	1	10.16	13.77	10.12	0.6	0	0.05	11.35	0.216667	-5.71107	3.57119e-16	1.22121e-14	At3g13620	PREDICTED: probable polyamine transporter At3g13620 [Prunus mume]	-	-	-	-	GO:0016020//membrane	-	-
Unigene0020997	1267	1809	1289	397	549	520	15.84	20.45	18.95	4.22	6.42	5.39	18.4133	5.34333	-1.78494	3.63537e-16	1.24179e-14	MO2	PREDICTED: FAD-dependent urate hydroxylase-like [Prunus mume]	-	-	-	-	-	GO:0003824//catalytic activity	GO:0044710//single-organism metabolic process
Unigene0021427	979	1044	791	2437	2347	2271	18.97	18.28	18.01	40.14	42.51	36.44	18.42	39.6967	1.10774	3.67799e-16	1.25498e-14	CRK15	Cysteine-rich receptor-like protein kinase 29 [Glycine soja]	-	-	-	-	-	-	-
Unigene0027470	3145	4485	3069	1931	1691	1971	30.98	39.93	35.53	16.17	15.57	16.08	35.48	15.94	-1.15435	3.71041e-16	1.26466e-14	ABCG11	PREDICTED: ABC transporter G family member 11-like isoform X2 [Prunus mume]	-	-	-	-	-	GO:0017111//nucleoside-triphosphatase activity;GO:0032550//purine ribonucleoside binding	-
Unigene0019979	0	0	0	253	150	246	0	0	0	2.39	1.56	2.27	0.001	2.07333	11.0177	3.7338e-16	1.27124e-14	--	hypothetical protein PRUPE_5G196600 [Prunus persica]	-	-	-	-	-	-	-
Unigene0032388	6991	6383	5415	804	1779	1214	281.14	231.99	255.94	27.49	66.89	40.44	256.357	44.94	-2.51208	3.79148e-16	1.28947e-14	--	-	-	-	-	-	-	-	-
Unigene0023767	252	318	247	20	8	46	3.19	3.64	3.68	0.22	0.09	0.48	3.50333	0.263333	-3.73377	3.98626e-16	1.35424e-14	NCS1	PREDICTED: purine-uracil permease NCS1 [Prunus mume]	-	-	-	-	GO:0031967//organelle envelope	GO:0022891//substrate-specific transmembrane transporter activity	GO:0008655//pyrimidine-containing compound salvage;GO:0009812//flavonoid metabolic process;GO:0044765//single-organism transport
Unigene0031349	2596	2765	1797	136	403	445	54.64	52.6	44.45	2.43	7.93	7.76	50.5633	6.04	-3.06547	3.99755e-16	1.3566e-14	--	hypothetical protein PRUPE_2G264000 [Prunus persica]	-	-	-	-	-	-	-
Unigene0007734	0	0	0	215	153	283	0	0	0	1.56	1.22	2	0.001	1.59333	10.6378	4.08487e-16	1.38473e-14	--	PREDICTED: ankyrin repeat-containing protein At5g02620-like [Prunus mume]	-	-	-	-	-	-	-
Unigene0002341	779	682	673	93	180	101	21.98	17.4	22.32	2.23	4.75	2.36	20.5667	3.11333	-2.72378	4.18113e-16	1.41429e-14	GRXS17	PREDICTED: monothiol glutaredoxin-S11-like [Prunus mume]	-	-	-	-	-	-	-
Unigene0000491	351	410	286	1614	865	1511	7.6	8.02	7.27	29.7	17.5	27.08	7.63	24.76	1.69826	4.21641e-16	1.42468e-14	--	PREDICTED: putative disease resistance RPP13-like protein 1 [Prunus mume]	-	-	-	-	-	-	-
Unigene0032799	21	34	47	643	232	495	0.07	0.11	0.19	1.87	0.74	1.4	0.123333	1.33667	3.43801	4.32605e-16	1.46015e-14	pol	PREDICTED: uncharacterized protein LOC107176464 [Citrus sinensis]	-	-	-	-	-	-	-
Unigene0036814	874	895	680	2114	2402	2317	18	16.66	16.46	37.02	46.25	39.52	17.04	40.93	1.26423	4.7208e-16	1.59166e-14	DFRA	PREDICTED: LOW QUALITY PROTEIN: vestitone reductase-like [Prunus mume]	-	-	-	-	-	GO:0048037//cofactor binding	-
Unigene0004796	0	0	0	196	240	192	0	0	0	2.56	3.45	2.44	0.001	2.81667	11.4598	5.04901e-16	1.70049e-14	--	PREDICTED: origin of replication complex subunit 1A-like [Prunus mume]	-	-	-	-	-	-	-
Unigene0000183	275	365	233	67	28	71	6.8	8.16	6.77	1.41	0.65	1.45	7.24333	1.17	-2.63015	5.46338e-16	1.83806e-14	--	hypothetical protein PRUPE_2G053600 [Prunus persica]	-	-	-	-	-	-	-
Unigene0005133	723	628	543	149	88	220	8.33	6.54	7.35	1.46	0.95	2.1	7.40667	1.50333	-2.30066	5.73077e-16	1.92595e-14	Bp10	ascorbate oxidase 2 [Prunus avium]	-	-	-	-	-	GO:0003824//catalytic activity	GO:0044710//single-organism metabolic process
Unigene0018421	461	491	404	210	157	172	3.43	3.3	3.53	1.33	1.09	1.06	3.42	1.16	-1.55987	6.19075e-16	2.07384e-14	GA20OX1	PREDICTED: gibberellin 20 oxidase 1-like [Prunus mume]	Metabolism;Metabolism;Metabolism	Global and overview maps;Global and overview maps;Metabolism of terpenoids and polyketides	ko01100//Metabolic pathways;ko01110//Biosynthesis of secondary metabolites;ko00904//Diterpenoid biosynthesis	K05282;K05282;K05282	-	GO:0016705//oxidoreductase activity, acting on paired donors, with incorporation or reduction of molecular oxygen;GO:0043169//cation binding	GO:0044710//single-organism metabolic process
Unigene0032121	145	169	147	0	0	0	3.35	3.53	4	0	0	0	3.62667	0.001	-11.8244	6.39244e-16	2.1391e-14	LRK10	PREDICTED: LEAF RUST 10 DISEASE-RESISTANCE LOCUS RECEPTOR-LIKE PROTEIN KINASE-like 2.4 isoform X2 [Prunus mume]	-	-	-	-	-	-	-
Unigene0016612	1253	1452	1012	698	635	759	12.42	13.01	11.79	5.88	5.88	6.23	12.4067	5.99667	-1.04888	6.50485e-16	2.17439e-14	GH3.10	PREDICTED: jasmonic acid-amido synthetase JAR1 [Prunus mume]	Environmental Information Processing	Signal transduction	ko04075//Plant hormone signal transduction	K14487	-	-	GO:0001101//response to acid chemical;GO:0006970//response to osmotic stress
Unigene0009578	41	19	39	267	328	377	0.92	0.39	1.03	5.1	6.89	7.02	0.78	6.33667	3.02218	6.67499e-16	2.22887e-14	PER21	PREDICTED: peroxidase 21 [Prunus mume]	Metabolism;Metabolism;Metabolism	Global and overview maps;Global and overview maps;Biosynthesis of other secondary metabolites	ko01100//Metabolic pathways;ko01110//Biosynthesis of secondary metabolites;ko00940//Phenylpropanoid biosynthesis	K00430;K00430;K00430	GO:0044444//cytoplasmic part	GO:0003824//catalytic activity;GO:0043169//cation binding;GO:0046906//tetrapyrrole binding	GO:0006950//response to stress;GO:0009620//response to fungus;GO:0042743//hydrogen peroxide metabolic process;GO:0044710//single-organism metabolic process
Unigene0032972	242	200	237	29	43	24	7.67	5.73	8.83	0.78	1.27	0.63	7.41	0.893333	-3.0522	6.71577e-16	2.2401e-14	MED15A	PREDICTED: LOW QUALITY PROTEIN: mediator of RNA polymerase II transcription subunit 15a-like [Prunus mume]	-	-	-	-	-	-	-
Unigene0000101	70	89	67	397	260	336	0.5	0.58	0.56	2.42	1.74	1.99	0.546667	2.05	1.90689	7.2424e-16	2.41318e-14	--	PREDICTED: putative disease resistance RPP13-like protein 1 [Prunus mume]	-	-	-	-	-	-	-
Unigene0023630	0	0	0	223	150	220	0	0	0	14.83	10.97	14.25	0.001	13.35	13.7046	7.26414e-16	2.41784e-14	--	PREDICTED: receptor-like protein kinase FERONIA [Prunus mume]	-	-	-	-	-	-	-
Unigene0035044	665	805	629	361	287	387	6.64	7.27	7.39	3.07	2.68	3.2	7.1	2.98333	-1.25089	7.65424e-16	2.54497e-14	--	HAT transposon superfamily [Theobroma cacao]	-	-	-	-	-	GO:0003676//nucleic acid binding;GO:0005515//protein binding	-
Unigene0000533	105	94	92	7	6	2	3.57	2.89	3.68	0.2	0.19	0.06	3.38	0.15	-4.49399	7.66564e-16	2.54605e-14	--	-	-	-	-	-	-	-	-
Unigene0033680	102	45	43	447	679	1241	5.11	2.04	2.53	19.04	31.8	51.5	3.22667	34.1133	3.40222	8.05753e-16	2.67337e-14	--	PREDICTED: uncharacterized protein LOC103955395 [Pyrus x bretschneideri]	-	-	-	-	-	-	-
Unigene0006971	0	0	0	273	187	164	0	0	0	5.21	3.92	3.05	0.001	4.06	11.9873	8.40864e-16	2.78395e-14	--	PREDICTED: eukaryotic translation initiation factor 3 subunit M-like [Prunus mume]	-	-	-	-	GO:0070993//translation preinitiation complex	-	GO:0006412//translation
Unigene0028560	2615	2851	2305	1508	975	1408	17.58	17.32	18.21	8.62	6.13	7.84	17.7033	7.53	-1.2333	8.97713e-16	2.96901e-14	At5g13980	PREDICTED: alpha-mannosidase-like isoform X2 [Prunus mume]	Metabolism	Glycan biosynthesis and metabolism	ko00511//Other glycan degradation	K01191	-	GO:0015923//mannosidase activity;GO:0046914//transition metal ion binding	GO:0019318//hexose metabolic process
Unigene0023779	17	12	15	135	202	176	0.34	0.21	0.35	2.26	3.72	2.87	0.3	2.95	3.29768	9.56362e-16	3.15964e-14	--	-	-	-	-	-	-	-	-
Unigene0009981	1180	1179	961	2645	2502	2612	10.41	9.4	9.96	19.84	20.63	19.08	9.92333	19.85	1.00024	9.71578e-16	3.20652e-14	ROPGEF14	PREDICTED: rop guanine nucleotide exchange factor 14 [Prunus mume]	-	-	-	-	-	-	GO:0043087//regulation of GTPase activity
Unigene0026183	152	162	127	0	0	0	4.81	4.63	4.72	0	0	0	4.72	0.001	-12.2046	1.00628e-15	3.31754e-14	--	PREDICTED: probable pectinesterase 67 [Prunus mume]	-	-	-	-	-	-	-
Unigene0009198	216	218	185	44	48	65	3.47	3.16	3.49	0.6	0.72	0.86	3.37333	0.726667	-2.21481	1.01256e-15	3.33472e-14	--	DOG1 domain-containing protein [Cephalotus follicularis]	-	-	-	-	-	-	-
Unigene0028984	506	527	397	112	160	164	12.7	11.96	11.71	2.39	3.76	3.41	12.1233	3.18667	-1.92767	1.04843e-15	3.44921e-14	At3g19800	LOW QUALITY PROTEIN: DUF177 domain-containing protein, partial [Cephalotus follicularis]	-	-	-	-	-	-	-
Unigene0034674	277	149	115	0	0	0	15.19	7.38	7.41	0	0	0	9.99333	0.001	-13.2868	1.06333e-15	3.49454e-14	--	hypothetical protein PRUPE_5G202300 [Prunus persica]	-	-	-	-	-	-	-
Unigene0026674	204	130	147	1119	895	2951	2.03	1.17	1.72	9.49	8.34	24.37	1.64	14.0667	3.10051	1.08531e-15	3.56304e-14	CpNIFS3	PREDICTED: probable L-cysteine desulfhydrase, chloroplastic isoform X1 [Prunus mume]	Metabolism;Metabolism	Global and overview maps;Amino acid metabolism	ko01100//Metabolic pathways;ko00270//Cysteine and methionine metabolism	K22207;K22207	-	GO:0043168//anion binding	-
Unigene0025544	264	207	207	53	51	63	15.74	11.15	14.5	2.69	2.84	3.11	13.7967	2.88	-2.26018	1.08726e-15	3.56567e-14	PKS5	chalcone synthase, partial [Prunus avium]	Metabolism;Metabolism;Metabolism;Organismal Systems	Global and overview maps;Global and overview maps;Biosynthesis of other secondary metabolites;Environmental adaptation	ko01100//Metabolic pathways;ko01110//Biosynthesis of secondary metabolites;ko00941//Flavonoid biosynthesis;ko04712//Circadian rhythm - plant	K00660;K00660;K00660;K00660	-	-	-
Unigene0002065	133	159	155	0	0	0	4.12	4.46	5.65	0	0	0	4.74333	0.001	-12.2117	1.16035e-15	3.8014e-14	--	-	-	-	-	-	-	-	-
Unigene0013784	491	459	361	1347	1323	1222	7.64	6.45	6.6	17.82	19.24	15.75	6.89667	17.6033	1.35188	1.17481e-15	3.84472e-14	HINT4	PREDICTED: histidine triad nucleotide-binding protein 3 [Fragaria vesca subsp. vesca] [Fragaria vesca]	-	-	-	-	-	-	GO:0008152//metabolic process
Unigene0035843	0	2	0	274	312	259	0	0.02	0	3.21	4.02	2.96	0.00666667	3.39667	8.99294	1.19846e-15	3.91803e-14	--	PREDICTED: zinc finger MYM-type protein 1-like [Prunus mume]	-	-	-	-	-	-	-
Unigene0015282	373	312	317	28	59	22	14.51	10.97	14.49	0.93	2.15	0.71	13.3233	1.26333	-3.39865	1.23042e-15	4.01832e-14	--	hypothetical protein PRUPE_5G012700 [Prunus persica]	-	-	-	-	-	-	-
Unigene0000785	2	0	0	272	262	267	0.1	0	0	11.81	12.51	11.29	0.0333333	11.87	8.47614	1.26623e-15	4.13091e-14	--	-	-	-	-	-	-	-	-
Unigene0001369	0	0	0	254	145	190	0	0	0	14.84	9.32	10.82	0.001	11.66	13.5093	1.27217e-15	4.14596e-14	--	PREDICTED: heat shock 70 kDa protein 18-like [Prunus mume]	Genetic Information Processing;Genetic Information Processing;Cellular Processes	Folding, sorting and degradation;Transcription;Transport and catabolism	ko04141//Protein processing in endoplasmic reticulum;ko03040//Spliceosome;ko04144//Endocytosis	K03283;K03283;K03283	-	-	-
Unigene0002150	108	181	131	0	2	1	7.38	11.18	10.52	0	0.13	0.06	9.69333	0.0633333	-7.25788	1.28006e-15	4.16733e-14	--	PREDICTED: LOW QUALITY PROTEIN: putative disease resistance RPP13-like protein 1 [Prunus mume]	-	-	-	-	-	-	-
Unigene0006680	132	219	116	0	0	0	9.69	14.52	10	0	0	0	11.4033	0.001	-13.4772	1.32498e-15	4.30746e-14	--	PREDICTED: TMV resistance protein N [Prunus mume]	-	-	-	-	-	-	-
Unigene0000475	1761	1768	1409	4075	3947	3876	24.09	21.86	22.66	47.41	50.49	43.93	22.87	47.2767	1.04767	1.32586e-15	4.30746e-14	--	Methyltransferase type 11 [Corchorus capsularis]	-	-	-	-	-	GO:0016741//transferase activity, transferring one-carbon groups	GO:0008152//metabolic process
Unigene0024767	6976	8105	6141	3846	3661	3345	127.09	133.45	131.49	59.58	62.36	50.48	130.677	57.4733	-1.18504	1.35579e-15	4.40013e-14	At1g23390	PREDICTED: F-box/kelch-repeat protein At1g23390 [Prunus mume]	-	-	-	-	-	-	-
Unigene0014397	111	129	107	526	525	417	1.64	1.72	1.86	6.62	7.26	5.11	1.74	6.33	1.86312	1.35786e-15	4.40226e-14	--	-	-	-	-	-	-	-	-
Unigene0015598	126	129	100	15	8	4	1.4	1.3	1.31	0.14	0.08	0.04	1.33667	0.0866667	-3.94702	1.52296e-15	4.9324e-14	At3g10080	PREDICTED: germin-like protein subfamily 3 member 2 [Prunus mume]	-	-	-	-	-	GO:0003824//catalytic activity;GO:0046914//transition metal ion binding	GO:0006801//superoxide metabolic process;GO:0044710//single-organism metabolic process
Unigene0035931	3842	4286	3396	2260	2068	2028	75.53	76.15	78.47	37.78	38.01	33.02	76.7167	36.27	-1.08076	1.57932e-15	5.09907e-14	--	Aldehyde dehydrogenase [Gossypium arboreum]	-	-	-	-	-	-	-
Unigene0022308	79	106	84	2	4	7	1.81	2.19	2.26	0.04	0.09	0.13	2.08667	0.0866667	-4.58958	1.7094e-15	5.51334e-14	--	PREDICTED: receptor-like protein 2 [Prunus mume]	-	-	-	-	-	-	-
Unigene0004280	207	189	91	0	0	0	2.02	1.67	1.05	0	0	0	1.58	0.001	-10.6257	1.74854e-15	5.63377e-14	PHT1-5	PREDICTED: LOW QUALITY PROTEIN: probable inorganic phosphate transporter 1-5 [Prunus mume]	-	-	-	-	GO:0031224//intrinsic component of membrane	GO:0005215//transporter activity	GO:0015698//inorganic anion transport;GO:0044763//single-organism cellular process
Unigene0034847	249	168	180	907	639	960	8.16	4.97	6.93	25.26	19.57	26.05	6.68667	23.6267	1.82106	1.99347e-15	6.40342e-14	At5g65660	Hydroxyproline-rich glycoprotein family protein [Theobroma cacao]	-	-	-	-	-	-	-
Unigene0035148	1093	793	931	3207	4831	5035	49.93	32.74	49.99	124.58	206.34	190.53	44.22	173.817	1.9748	1.99357e-15	6.40342e-14	--	hypothetical protein PRUPE_1G173600 [Prunus persica]	-	-	-	-	-	-	-
Unigene0009670	116	167	147	0	0	0	2.86	3.72	4.26	0	0	0	3.61333	0.001	-11.8191	2.24108e-15	7.19102e-14	--	-	-	-	-	-	-	-	-
Unigene0018513	329	354	248	957	949	870	3.91	3.8	3.46	9.67	10.54	8.56	3.72333	9.59	1.36494	2.41668e-15	7.7386e-14	TFCC	PREDICTED: tubulin-folding cofactor C [Prunus mume]	-	-	-	-	-	-	GO:0009987//cellular process;GO:0016043//cellular component organization;GO:0070271//protein complex biogenesis
Unigene0013494	12	11	17	176	115	157	1.06	0.88	1.76	13.22	9.5	11.49	1.23333	11.4033	3.20882	2.62522e-15	8.39773e-14	--	-	-	-	-	-	-	-	-
Unigene0020497	0	0	0	259	104	281	0	0	0	12.59	5.56	13.31	0.001	10.4867	13.3563	2.64021e-15	8.43707e-14	--	PREDICTED: disease resistance protein TAO1-like isoform X1 [Prunus mume]	-	-	-	-	-	-	-
Unigene0035579	0	0	0	138	280	199	0	0	0	2.75	6.14	3.87	0.001	4.25333	12.0544	2.72079e-15	8.6768e-14	--	PREDICTED: trichohyalin-like isoform X1 [Prunus mume]	-	-	-	-	-	-	-
Unigene0006233	0	0	0	150	197	190	0	0	0	13.7	19.78	16.91	0.001	16.7967	14.0359	2.81749e-15	8.97602e-14	--	-	-	-	-	-	-	-	-
Unigene0000348	51	44	31	242	252	224	1.61	1.25	1.15	6.49	7.43	5.85	1.33667	6.59	2.30164	2.83614e-15	9.0262e-14	OFUT6	PREDICTED: dnaJ protein homolog 2-like [Malus domestica]	-	-	-	-	-	-	-
Unigene0011106	5	4	1	173	68	216	0.32	0.23	0.07	9.28	4.01	11.29	0.206667	8.19333	5.30907	2.8867e-15	9.17776e-14	--	-	-	-	-	-	-	-	-
Unigene0000217	259	210	208	1023	850	754	7.14	5.23	6.74	23.98	21.91	17.22	6.37	21.0367	1.72354	2.90607e-15	9.22997e-14	--	PREDICTED: uncharacterized transmembrane protein DDB_G0289901-like [Prunus mume]	-	-	-	-	-	-	-
Unigene0001222	1169	1274	962	557	553	692	14.43	14.21	13.96	5.85	6.38	7.08	14.2	6.43667	-1.14151	2.91067e-15	9.23516e-14	LPA3	PREDICTED: protein LOW PSII ACCUMULATION 3, chloroplastic [Prunus mume]	-	-	-	-	-	-	-
Unigene0031506	0	0	0	197	149	170	0	0	0	2.2	1.83	1.85	0.001	1.96	10.9366	2.97818e-15	9.43978e-14	--	PREDICTED: GATA zinc finger domain-containing protein 14-like [Prunus mume]	-	-	-	-	-	-	-
Unigene0035478	1593	1583	1106	1	8	0	21.68	19.47	17.69	0.01	0.1	0	19.6133	0.0366667	-9.06315	3.02008e-15	9.56288e-14	UGT91C1	PREDICTED: UDP-glycosyltransferase 91C1-like [Prunus mume]	-	-	-	-	-	-	-
Unigene0014782	0	0	0	192	126	220	0	0	0	1.77	1.28	1.98	0.001	1.67667	10.7114	3.04656e-15	9.63694e-14	SEOB	PREDICTED: protein SIEVE ELEMENT OCCLUSION B-like [Prunus mume]	-	-	-	-	-	-	-
Unigene0030836	231	254	216	0	0	1	16.49	16.39	18.13	0	0	0.06	17.0033	0.02	-9.7316	3.14872e-15	9.94283e-14	--	PREDICTED: uncharacterized protein LOC103341630 [Prunus mume]	-	-	-	-	-	-	-
Unigene0021129	209	372	325	50	65	54	2.93	4.72	5.36	0.6	0.85	0.63	4.33667	0.693333	-2.64497	3.14963e-15	9.94283e-14	CYP84A1	PREDICTED: cytochrome P450 84A1 [Prunus mume]	Metabolism;Metabolism;Metabolism	Global and overview maps;Global and overview maps;Biosynthesis of other secondary metabolites	ko01100//Metabolic pathways;ko01110//Biosynthesis of secondary metabolites;ko00940//Phenylpropanoid biosynthesis	K09755;K09755;K09755	-	-	-
Unigene0019793	2	0	0	267	185	349	0.02	0	0	2.63	2	3.35	0.00666667	2.66	8.64024	3.45891e-15	1.09081e-13	AAE2	PREDICTED: probable acyl-activating enzyme 2 [Prunus mume]	-	-	-	-	-	GO:0016405//CoA-ligase activity	GO:0009685//gibberellin metabolic process;GO:0010476//gibberellin mediated signaling pathway;GO:0032787//monocarboxylic acid metabolic process
Unigene0013252	0	0	0	155	187	176	0	0	0	3.61	4.79	4	0.001	4.13333	12.0131	3.53286e-15	1.11301e-13	--	PREDICTED: pyruvate dehydrogenase E1 component subunit alpha-3, chloroplastic isoform X1 [Prunus mume]	Metabolism;Metabolism;Metabolism;Metabolism;Metabolism;Metabolism	Global and overview maps;Global and overview maps;Global and overview maps;Carbohydrate metabolism;Carbohydrate metabolism;Carbohydrate metabolism	ko01100//Metabolic pathways;ko01110//Biosynthesis of secondary metabolites;ko01200//Carbon metabolism;ko00010//Glycolysis / Gluconeogenesis;ko00620//Pyruvate metabolism;ko00020//Citrate cycle (TCA cycle)	K00161;K00161;K00161;K00161;K00161;K00161	-	-	-
Unigene0025858	639	757	534	282	245	211	4.62	4.95	4.54	1.73	1.66	1.26	4.70333	1.55	-1.60142	3.55594e-15	1.11915e-13	--	PREDICTED: probable serine incorporator [Prunus mume]	-	-	-	-	-	-	-
Unigene0011522	3789	4726	3082	1681	1923	1862	67.48	76.07	64.51	25.46	32.02	27.47	69.3533	28.3167	-1.29231	3.72329e-15	1.16947e-13	YUC10	PREDICTED: probable indole-3-pyruvate monooxygenase YUCCA10 [Prunus mume]	Metabolism;Metabolism	Global and overview maps;Amino acid metabolism	ko01100//Metabolic pathways;ko00380//Tryptophan metabolism	K11816;K11816	-	GO:0000166//nucleotide binding;GO:0016709//oxidoreductase activity, acting on paired donors, with incorporation or reduction of molecular oxygen, NAD(P)H as one donor, and incorporation of one atom of oxygen	GO:0009653//anatomical structure morphogenesis;GO:0009850//auxin metabolic process;GO:0044710//single-organism metabolic process
Unigene0018467	654	661	561	1479	1547	1704	10.28	9.39	10.37	19.77	22.74	22.19	10.0133	21.5667	1.10688	3.95577e-15	1.24124e-13	GDPD5	PREDICTED: glycerophosphodiester phosphodiesterase GDPD6 [Prunus mume]	Metabolism	Lipid metabolism	ko00564//Glycerophospholipid metabolism	K01126	-	GO:0008081//phosphoric diester hydrolase activity	GO:0044238//primary metabolic process
Unigene0016039	1	5	2	126	77	136	0.03	0.13	0.07	3.01	2.02	3.16	0.0766667	2.73	5.15416	4.09735e-15	1.28437e-13	--	PREDICTED: LOW QUALITY PROTEIN: G-type lectin S-receptor-like serine/threonine-protein kinase At4g27290 [Prunus mume]	-	-	-	-	-	-	-
Unigene0023004	0	0	0	180	126	208	0	0	0	12.67	9.75	14.27	0.001	12.23	13.5781	4.30478e-15	1.34682e-13	--	PREDICTED: la-related protein 6A [Pyrus x bretschneideri]	-	-	-	-	-	-	-
Unigene0000534	2907	3423	2430	1280	1403	1167	28.42	30.25	27.93	10.64	12.83	9.45	28.8667	10.9733	-1.3954	4.30519e-15	1.34682e-13	--	PREDICTED: uncharacterized protein LOC103420687 [Malus domestica]	-	-	-	-	-	-	-
Unigene0024713	286	362	242	35	49	15	2.89	3.3	2.87	0.3	0.46	0.13	3.02	0.296667	-3.34763	4.3786e-15	1.36841e-13	ASY1	PREDICTED: HORMA domain-containing protein 1-like [Fragaria vesca subsp. vesca] [Fragaria vesca]	-	-	-	-	-	-	-
Unigene0032966	75	133	74	3	6	6	2.9	4.65	3.36	0.1	0.22	0.19	3.63667	0.17	-4.41901	4.85322e-15	1.51522e-13	--	-	-	-	-	-	-	-	-
Unigene0025603	0	0	0	232	99	276	0	0	0	21.68	10.17	25.12	0.001	18.99	14.213	5.01212e-15	1.56327e-13	--	PREDICTED: ankyrin repeat-containing protein At5g02620-like [Prunus mume]	-	-	-	-	-	-	-
Unigene0035659	118	143	128	0	0	0	4.68	5.13	5.97	0	0	0	5.26	0.001	-12.3608	5.04566e-15	1.57216e-13	--	PREDICTED: probable disease resistance protein RPP1 [Prunus mume]	-	-	-	-	-	-	-
Unigene0032695	19	21	12	203	106	198	0.14	0.14	0.1	1.24	0.71	1.18	0.126667	1.04333	3.04209	5.09816e-15	1.58693e-13	RLP6	PREDICTED: receptor-like protein 12 [Prunus mume]	-	-	-	-	-	-	-
Unigene0018948	119	157	112	0	0	0	9.85	11.75	10.9	0	0	0	10.8333	0.001	-13.4032	5.16301e-15	1.60552e-13	--	PREDICTED: disease resistance protein TAO1-like isoform X2 [Prunus mume]	-	-	-	-	-	-	-
Unigene0022414	198	156	130	618	532	569	1.99	1.42	1.54	5.29	5	4.74	1.65	5.01	1.60234	5.55065e-15	1.72435e-13	CYP72A67	PREDICTED: cytochrome P450 CYP749A22-like [Prunus mume]	Metabolism	Metabolism of terpenoids and polyketides	ko00905//Brassinosteroid biosynthesis	K15639	-	-	-
Unigene0001055	4	5	3	123	69	167	0.1	0.11	0.09	2.64	1.63	3.49	0.1	2.58667	4.69302	5.59078e-15	1.73509e-13	--	-	-	-	-	-	-	-	-
Unigene0019770	202	291	191	0	1	0	9.35	12.18	10.4	0	0.04	0	10.6433	0.0133333	-9.6407	5.59822e-15	1.73567e-13	LRR-RLK	PREDICTED: probable LRR receptor-like serine/threonine-protein kinase At1g07650 [Prunus mume]	-	-	-	-	-	-	-
Unigene0021582	189	238	147	0	0	2	8.49	9.66	7.76	0	0	0.07	8.63667	0.0233333	-8.53194	5.63077e-15	1.74403e-13	--	PREDICTED: disease resistance-like protein CSA1 isoform X1 [Prunus mume]	-	-	-	-	-	-	-
Unigene0035801	694	673	566	220	263	219	22.21	19.47	21.29	5.99	7.87	5.81	20.99	6.55667	-1.67867	5.72022e-15	1.76998e-13	--	PREDICTED: heterogeneous nuclear ribonucleoproteins A1 homolog [Prunus mume]	-	-	-	-	-	-	-
Unigene0002275	571	552	466	1279	1119	1365	11.99	10.47	11.5	22.83	21.96	23.73	11.32	22.84	1.01269	6.09416e-15	1.88382e-13	--	PREDICTED: protein enabled homolog [Prunus mume]	-	-	-	-	-	-	-
Unigene0014781	119	122	84	0	0	4	3.42	3.17	2.84	0	0	0.1	3.14333	0.0333333	-6.55919	6.11156e-15	1.88733e-13	--	PREDICTED: uncharacterized protein LOC103323837 [Prunus mume]	-	-	-	-	-	-	-
Unigene0008511	16700	21130	14413	5640	7823	6574	222.98	254.99	226.19	64.03	97.66	72.71	234.72	78.1333	-1.58693	6.1913e-15	1.91006e-13	--	Polyketide cyclase/dehydrase and lipid transport superfamily protein [Theobroma cacao]	-	-	-	-	-	GO:0005488//binding	-
Unigene0012267	101	131	61	530	331	553	1.05	1.24	0.75	4.71	3.23	4.78	1.01333	4.24	2.06496	6.21755e-15	1.91627e-13	GH3.1	PREDICTED: probable indole-3-acetic acid-amido synthetase GH3.1 [Prunus mume]	Environmental Information Processing	Signal transduction	ko04075//Plant hormone signal transduction	K14487	-	GO:0003824//catalytic activity	GO:0009725//response to hormone;GO:0014070//response to organic cyclic compound
Unigene0032804	1439	1341	1210	555	289	552	25.49	21.47	25.2	8.36	4.79	8.1	24.0533	7.08333	-1.76374	6.32799e-15	1.94838e-13	--	PREDICTED: uncharacterized protein LOC103336678 [Prunus mume]	-	-	-	-	-	-	-
Unigene0035426	236	271	199	766	555	925	2.05	2.13	2.04	5.67	4.52	6.67	2.07333	5.62	1.43862	6.81468e-15	2.09617e-13	CNGC14	PREDICTED: LOW QUALITY PROTEIN: probable cyclic nucleotide-gated ion channel 14 [Prunus mume]	Organismal Systems	Environmental adaptation	ko04626//Plant-pathogen interaction	K05391	GO:0031224//intrinsic component of membrane	GO:0005267//potassium channel activity	GO:0030001//metal ion transport;GO:0034220//ion transmembrane transport
Unigene0025562	30	25	20	177	248	186	1.49	1.12	1.17	7.48	11.52	7.65	1.26	8.88333	2.81768	6.92909e-15	2.12926e-13	--	-	-	-	-	-	-	-	-
Unigene0000309	0	0	0	186	206	131	0	0	0	4.56	5.55	3.13	0.001	4.41333	12.1077	7.13016e-15	2.1889e-13	--	PREDICTED: disease resistance protein At4g27190-like [Prunus mume]	-	-	-	-	-	-	-
Unigene0001141	393	450	286	102	120	85	5.08	5.26	4.34	1.12	1.45	0.91	4.89333	1.16	-2.07669	7.22981e-15	2.21731e-13	At1g51965	PREDICTED: caffeoylshikimate esterase-like [Prunus mume]	Metabolism;Metabolism	Global and overview maps;Lipid metabolism	ko01100//Metabolic pathways;ko00561//Glycerolipid metabolism	K01054;K01054	-	GO:0003824//catalytic activity	-
Unigene0033536	0	0	0	161	160	155	0	0	0	10.63	11.62	9.97	0.001	10.74	13.3907	7.26493e-15	2.22589e-13	--	hypothetical protein PRUPE_4G286200 [Prunus persica]	-	-	-	-	-	-	-
Unigene0023519	92	173	103	6	0	0	1.59	2.71	2.1	0.09	0	0	2.13333	0.03	-6.152	7.3503e-15	2.24984e-13	--	-	-	-	-	-	-	-	-
Unigene0022325	0	1	0	276	304	269	0	0.03	0	6.54	7.92	6.21	0.01	6.89	9.42836	7.67032e-15	2.34549e-13	--	RnaseH (mitochondrion) [Malus domestica]	-	-	-	-	-	-	-
Unigene0018688	592	638	444	1846	2292	1723	8.7	8.47	7.67	23.06	31.49	20.97	8.28	25.1733	1.60419	7.81909e-15	2.38865e-13	BHLH93	PREDICTED: transcription factor bHLH93-like [Prunus mume]	-	-	-	-	-	GO:0005515//protein binding	-
Unigene0007562	2	0	2	136	310	121	0.03	0	0.04	1.99	4.99	1.73	0.0233333	2.90333	6.95917	7.85334e-15	2.39677e-13	--	PREDICTED: two-pore potassium channel 3-like [Jatropha curcas]	-	-	-	-	-	-	-
Unigene0036922	25	28	15	178	233	167	1.98	2	1.4	11.99	17.26	10.96	1.79333	13.4033	2.90188	8.26849e-15	2.521e-13	--	PREDICTED: TMV resistance protein N-like [Prunus mume]	-	-	-	-	-	-	-
Unigene0025122	60	128	50	532	478	427	1.89	3.65	1.85	14.27	14.1	11.16	2.46333	13.1767	2.4193	8.67937e-15	2.64369e-13	PI206	PREDICTED: disease resistance response protein 206-like [Prunus mume]	-	-	-	-	-	-	-
Unigene0026163	115	167	99	0	0	0	2.94	3.86	2.98	0	0	0	3.26	0.001	-11.6707	8.82482e-15	2.68538e-13	--	-	-	-	-	-	-	-	-
Unigene0034386	0	0	0	149	262	145	0	0	0	8.56	16.55	8.11	0.001	11.0733	13.4348	8.87952e-15	2.69939e-13	HSP70-3	PREDICTED: heat shock cognate 70 kDa protein-like [Prunus mume]	Genetic Information Processing;Genetic Information Processing;Cellular Processes	Folding, sorting and degradation;Transcription;Transport and catabolism	ko04141//Protein processing in endoplasmic reticulum;ko03040//Spliceosome;ko04144//Endocytosis	K03283;K03283;K03283	-	-	-
Unigene0009631	185	217	133	15	33	19	3.97	4.21	3.36	0.27	0.66	0.34	3.84667	0.423333	-3.18374	8.9845e-15	2.72865e-13	--	PREDICTED: pentatricopeptide repeat-containing protein At1g62350-like [Prunus mume]	-	-	-	-	-	-	-
Unigene0000114	10	7	15	140	265	170	0.26	0.16	0.46	3.08	6.4	3.64	0.293333	4.37333	3.89812	9.16655e-15	2.78123e-13	--	PREDICTED: LRR receptor-like serine/threonine-protein kinase GSO2 [Prunus mume]	-	-	-	-	-	-	-
Unigene0033132	412	384	276	136	116	147	7.23	6.09	5.69	2.03	1.9	2.14	6.33667	2.02333	-1.64699	9.53318e-15	2.88966e-13	ACL5	PREDICTED: thermospermine synthase ACAULIS5 [Prunus mume]	-	-	-	-	-	GO:0016765//transferase activity, transferring alkyl or aryl (other than methyl) groups	-
Unigene0030203	252	200	200	0	1	0	11.07	7.94	10.32	0	0.04	0	9.77667	0.0133333	-9.51816	9.77976e-15	2.96153e-13	CML16	PREDICTED: probable calcium-binding protein CML16 [Malus domestica]	Organismal Systems	Environmental adaptation	ko04626//Plant-pathogen interaction	K13448	-	GO:0016628//oxidoreductase activity, acting on the CH-CH group of donors, NAD or NADP as acceptor	GO:0044710//single-organism metabolic process
Unigene0005432	0	0	0	124	238	173	0	0	0	3.63	7.67	4.94	0.001	5.41333	12.4023	1.05845e-14	3.20212e-13	--	PREDICTED: cyclic nucleotide-gated ion channel 1-like [Prunus mume]	Organismal Systems	Environmental adaptation	ko04626//Plant-pathogen interaction	K05391	-	-	-
Unigene0033905	823	749	595	187	253	291	11.02	9.06	9.36	2.13	3.17	3.23	9.81333	2.84333	-1.78716	1.06348e-14	3.21422e-13	BAHD1	PREDICTED: BAHD acyltransferase At5g47980-like [Prunus mume]	-	-	-	-	-	-	-
Unigene0019722	114	151	100	0	0	0	6.1	7.3	6.28	0	0	0	6.56	0.001	-12.6795	1.11301e-14	3.36067e-13	--	-	-	-	-	-	-	-	-
Unigene0032110	221	246	187	39	47	71	2.64	2.65	2.62	0.4	0.52	0.7	2.63667	0.54	-2.28768	1.14408e-14	3.44998e-13	--	PREDICTED: protein ACCELERATED CELL DEATH 6-like [Prunus mume]	-	-	-	-	-	-	-
Unigene0030418	242	245	199	74	37	49	3.06	2.8	2.96	0.8	0.44	0.51	2.94	0.583333	-2.33342	1.1448e-14	3.44998e-13	GMII	AT5G14950-like protein, partial [Capsella rubella]	Metabolism;Metabolism	Global and overview maps;Glycan biosynthesis and metabolism	ko01100//Metabolic pathways;ko00510//N-Glycan biosynthesis	K01231;K01231	-	-	-
Unigene0026604	8	17	15	180	110	154	0.85	1.64	1.88	16.29	10.95	13.58	1.45667	13.6067	3.22357	1.16368e-14	3.5035e-13	--	hypothetical protein PRUPE_2G147800 [Prunus persica]	-	-	-	-	-	-	-
Unigene0021141	97	82	78	370	374	339	3.45	2.63	3.26	11.18	12.43	9.98	3.11333	11.1967	1.84654	1.23508e-14	3.71486e-13	PAM16L2	PREDICTED: mitochondrial import inner membrane translocase subunit tim16 [Prunus mume]	-	-	-	-	GO:0043234//protein complex	-	GO:0006605//protein targeting;GO:0006839//mitochondrial transport
Unigene0019480	0	0	0	186	146	135	0	0	0	15.78	13.62	11.16	0.001	13.52	13.7228	1.25991e-14	3.78593e-13	--	PREDICTED: translation initiation factor eIF-2B subunit alpha-like [Prunus mume]	Genetic Information Processing	Translation	ko03013//RNA transport	K03239	-	-	-
Unigene0012601	200	110	116	2	11	10	2.49	1.24	1.7	0.02	0.13	0.1	1.81	0.0833333	-4.44095	1.30872e-14	3.92881e-13	INT4	PREDICTED: LOW QUALITY PROTEIN: inositol transporter 4-like [Prunus mume]	-	-	-	-	GO:0031224//intrinsic component of membrane	GO:0003824//catalytic activity;GO:0022857//transmembrane transporter activity	GO:0044763//single-organism cellular process;GO:0051234//establishment of localization
Unigene0032895	904	738	643	229	220	351	18.84	13.9	15.75	4.06	4.29	6.06	16.1633	4.80333	-1.75062	1.31786e-14	3.95245e-13	TEM1	PREDICTED: AP2/ERF and B3 domain-containing transcription repressor RAV2-like [Prunus mume]	-	-	-	-	-	-	-
Unigene0004636	539	587	440	277	224	272	9.68	9.53	9.29	4.23	3.76	4.05	9.5	4.01333	-1.24313	1.32565e-14	3.972e-13	At3g07870	PREDICTED: F-box only protein 8-like [Prunus mume]	-	-	-	-	-	-	-
Unigene0001886	0	0	0	145	123	196	0	0	0	5.06	4.72	6.66	0.001	5.48	12.42	1.33956e-14	4.00598e-13	RGA2	PREDICTED: disease resistance protein RGA2-like [Prunus mume]	-	-	-	-	-	-	-
Unigene0034174	133	194	140	5	14	23	11.17	14.72	13.82	0.36	1.1	1.6	13.2367	1.02	-3.6979	1.36294e-14	4.07199e-13	--	-	-	-	-	-	-	-	-
Unigene0009701	832	561	582	2942	2638	2227	50.1	30.53	41.19	150.65	148.53	111.08	40.6067	136.753	1.75179	1.36473e-14	4.07344e-13	--	hypothetical protein PRUPE_ppa013932mg [Prunus persica]	-	-	-	-	-	-	-
Unigene0001051	236	255	172	68	66	68	5.56	5.43	4.76	1.36	1.45	1.33	5.25	1.38	-1.92765	1.38431e-14	4.12793e-13	--	hypothetical protein PRUPE_1G174300 [Prunus persica]	-	-	-	-	-	-	-
Unigene0009913	126	154	87	0	0	0	1.17	1.3	0.95	0	0	0	1.14	0.001	-10.1548	1.39144e-14	4.14524e-13	pol	PREDICTED: uncharacterized protein LOC101299390 [Fragaria vesca subsp. vesca] [Fragaria vesca]	-	-	-	-	-	-	-
Unigene0000509	81	81	101	1	4	4	0.85	0.77	1.25	0.01	0.04	0.03	0.956667	0.0266667	-5.16491	1.42948e-14	4.2545e-13	--	PREDICTED: TMV resistance protein N-like [Prunus mume]	-	-	-	-	-	-	-
Unigene0011656	6	4	6	99	170	111	0.2	0.12	0.23	2.78	5.25	3.04	0.183333	3.69	4.33108	1.45158e-14	4.31616e-13	--	-	-	-	-	-	-	-	-
Unigene0008392	1253	1270	1027	679	625	671	25	22.91	24.09	11.52	11.66	11.09	24	11.4233	-1.07105	1.45695e-14	4.32803e-13	PIN3	PREDICTED: auxin efflux carrier component 3 [Prunus mume]	-	-	-	-	-	-	GO:0044763//single-organism cellular process
Unigene0016315	368	523	388	5	45	18	4.99	6.41	6.18	0.06	0.57	0.2	5.86	0.276667	-4.40468	1.4637e-14	4.34394e-13	TDC2	PREDICTED: aromatic-L-amino-acid decarboxylase-like [Prunus mume]	Metabolism;Metabolism;Metabolism;Metabolism;Metabolism;Metabolism;Metabolism;Metabolism	Global and overview maps;Global and overview maps;Amino acid metabolism;Amino acid metabolism;Amino acid metabolism;Biosynthesis of other secondary metabolites;Biosynthesis of other secondary metabolites;Biosynthesis of other secondary metabolites	ko01100//Metabolic pathways;ko01110//Biosynthesis of secondary metabolites;ko00350//Tyrosine metabolism;ko00360//Phenylalanine metabolism;ko00380//Tryptophan metabolism;ko00950//Isoquinoline alkaloid biosynthesis;ko00965//Betalain biosynthesis;ko00901//Indole alkaloid biosynthesis	K01593;K01593;K01593;K01593;K01593;K01593;K01593;K01593	-	GO:0016830//carbon-carbon lyase activity;GO:0043168//anion binding	GO:0019752//carboxylic acid metabolic process
Unigene0006679	164	268	182	24	43	31	7.1	10.48	9.26	0.88	1.74	1.11	8.94667	1.24333	-2.84714	1.46924e-14	4.35624e-13	--	PREDICTED: protein SUPPRESSOR OF npr1-1, CONSTITUTIVE 1-like [Gossypium arboreum]	-	-	-	-	-	-	-
Unigene0006360	913	1086	809	470	466	447	16.15	17.36	16.82	7.07	7.71	6.55	16.7767	7.11	-1.23853	1.55803e-14	4.6151e-13	TFT7	PREDICTED: 14-3-3 protein 7 [Prunus mume]	-	-	-	-	-	-	-
Unigene0010441	0	0	0	137	126	196	0	0	0	1.85	1.87	2.58	0.001	2.1	11.0362	1.58166e-14	4.68067e-13	--	hypothetical protein PRUPE_8G245400 [Prunus persica]	-	-	-	-	-	-	-
Unigene0005153	766	977	800	360	387	410	19.29	22.24	23.68	7.71	9.11	8.55	21.7367	8.45667	-1.36197	1.64374e-14	4.85517e-13	--	-	-	-	-	-	-	-	-
Unigene0016586	213	218	167	49	54	40	4.8	4.44	4.42	0.94	1.14	0.75	4.55333	0.943333	-2.27108	1.74564e-14	5.14643e-13	--	-	-	-	-	-	-	-	-
Unigene0009279	1290	1150	890	304	429	337	38.17	30.75	30.95	7.65	11.87	8.26	33.29	9.26	-1.846	1.80672e-14	5.32148e-13	RPL3	PREDICTED: 50S ribosomal protein L3, chloroplastic [Prunus mume]	Genetic Information Processing	Translation	ko03010//Ribosome	K02906	GO:0009536//plastid	-	GO:0044237//cellular metabolic process;GO:0071704//organic substance metabolic process
Unigene0020499	0	0	0	153	112	190	0	0	0	8.36	6.73	10.12	0.001	8.40333	13.0367	1.81029e-14	5.32695e-13	--	PREDICTED: TMV resistance protein N-like [Prunus mume]	Genetic Information Processing	Folding, sorting and degradation	ko04141//Protein processing in endoplasmic reticulum	K13525	-	-	-
Unigene0029152	308	357	186	891	948	1004	4.74	4.96	3.36	11.66	13.64	12.79	4.35333	12.6967	1.54426	1.81989e-14	5.34514e-13	--	hypothetical protein PRUPE_4G026600 [Prunus persica]	-	-	-	-	-	-	-
Unigene0016489	0	0	0	136	161	148	0	0	0	6.31	8.21	6.69	0.001	7.07	12.7875	1.92601e-14	5.65151e-13	PPH	PREDICTED: pheophytinase, chloroplastic [Prunus mume]	-	-	-	-	-	-	-
Unigene0022956	182	200	149	562	567	529	2.95	2.93	2.84	7.74	8.59	7.1	2.90667	7.81	1.42596	1.95351e-14	5.7268e-13	DFRA	PREDICTED: anthocyanidin reductase-like [Prunus mume]	-	-	-	-	-	GO:0048037//cofactor binding	-
Unigene0001173	242	185	159	692	563	831	2.43	1.68	1.88	5.92	5.29	6.92	1.99667	6.04333	1.59775	1.96648e-14	5.75943e-13	--	PREDICTED: uncharacterized protein LOC103342596 [Prunus mume]	-	-	-	-	-	-	-
Unigene0008582	377	390	255	135	111	140	4.01	3.75	3.19	1.22	1.1	1.23	3.65	1.18333	-1.62504	2.06029e-14	6.02852e-13	CAX5	PREDICTED: vacuolar cation/proton exchanger 5-like [Prunus mume]	-	-	-	-	GO:0031224//intrinsic component of membrane	GO:0015368//calcium:cation antiporter activity	GO:0006816//calcium ion transport;GO:0044763//single-organism cellular process
Unigene0022855	512	558	432	75	147	127	5.05	4.97	5.01	0.63	1.36	1.04	5.01	1.01	-2.31046	2.21792e-14	6.48368e-13	ITN1	PREDICTED: ankyrin repeat-containing protein At2g01680-like [Prunus mume]	-	-	-	-	-	-	-
Unigene0033901	0	0	0	128	132	178	0	0	0	1.58	1.79	2.14	0.001	1.83667	10.8429	2.27955e-14	6.6514e-13	At3g47200	PREDICTED: UPF0481 protein At3g47200-like [Prunus mume]	-	-	-	-	-	-	-
Unigene0004868	109	134	94	0	0	0	2.6	2.89	2.63	0	0	0	2.70667	0.001	-11.4023	2.50224e-14	7.29434e-13	--	PREDICTED: remorin [Prunus mume]	-	-	-	-	-	-	-
Unigene0025678	9	14	11	136	111	111	0.09	0.13	0.13	1.15	1.03	0.92	0.116667	1.03333	3.14684	2.51228e-14	7.31678e-13	--	Retrovirus-related Pol polyprotein from transposon TNT 1-94 [Cajanus cajan]	-	-	-	-	-	-	-
Unigene0027023	4896	4035	4175	1915	1615	2431	88.25	65.73	88.45	29.35	27.22	36.3	80.81	30.9567	-1.38428	2.72013e-14	7.91473e-13	DFR	dihydroflavonol 4-reductase [Prunus salicina]	Metabolism;Metabolism;Metabolism	Global and overview maps;Global and overview maps;Biosynthesis of other secondary metabolites	ko01100//Metabolic pathways;ko01110//Biosynthesis of secondary metabolites;ko00941//Flavonoid biosynthesis	K13082;K13082;K13082	-	-	-
Unigene0001780	22585	37788	22242	11221	11539	13358	208.11	314.7	240.89	87.92	99.41	101.95	254.567	96.4267	-1.40054	2.77263e-14	8.05998e-13	HSP83A	PREDICTED: heat shock protein 83 [Prunus mume]	Organismal Systems;Genetic Information Processing	Environmental adaptation;Folding, sorting and degradation	ko04626//Plant-pathogen interaction;ko04141//Protein processing in endoplasmic reticulum	K04079;K04079	-	GO:0005515//protein binding	GO:0044267//cellular protein metabolic process;GO:0050896//response to stimulus
Unigene0034301	181	200	205	0	1	0	7.27	7.26	9.67	0	0.04	0	8.06667	0.0133333	-9.24079	2.78656e-14	8.09296e-13	--	PREDICTED: probable disease resistance protein RF45 [Prunus mume]	-	-	-	-	-	-	-
Unigene0002177	3315	2363	1977	432	791	634	54	34.79	37.85	5.98	12.05	8.55	42.2133	8.86	-2.25232	3.08897e-14	8.96289e-13	TEM1	PREDICTED: AP2/ERF and B3 domain-containing transcription factor RAV1 [Prunus mume]	-	-	-	-	-	-	GO:0010467//gene expression;GO:0034645//cellular macromolecule biosynthetic process
Unigene0032935	156	302	170	0	0	1	6.13	10.72	7.85	0	0	0.03	8.23333	0.01	-9.68533	3.12823e-14	9.0684e-13	--	-	-	-	-	-	-	-	-
Unigene0001012	114	109	67	2	2	0	4.47	3.86	3.09	0.07	0.07	0	3.80667	0.0466667	-6.34999	3.21347e-14	9.30684e-13	--	PREDICTED: CBL-interacting serine/threonine-protein kinase 12-like [Prunus mume]	-	-	-	-	-	-	-
Unigene0010863	108	90	79	0	4	1	2.93	2.2	2.52	0	0.1	0.02	2.55	0.04	-5.99435	3.39701e-14	9.82929e-13	RD22	PREDICTED: BURP domain protein RD22-like [Prunus mume]	-	-	-	-	-	-	-
Unigene0019451	899	1078	891	518	333	405	6.91	7.49	8.05	3.39	2.39	2.58	7.48333	2.78667	-1.42514	3.41353e-14	9.86796e-13	PRMT16	PREDICTED: protein arginine N-methyltransferase 1.6 [Prunus mume]	-	-	-	-	-	-	-
Unigene0000607	360	290	292	1081	1075	981	8.36	6.09	7.97	21.34	23.34	18.87	7.47333	21.1833	1.50311	3.41941e-14	9.87579e-13	--	PREDICTED: TMV resistance protein N-like [Prunus mume]	-	-	-	-	-	-	-
Unigene0031562	142	113	146	12	2	15	1.57	1.13	1.9	0.11	0.02	0.14	1.53333	0.09	-4.0906	3.4403e-14	9.92696e-13	AGO4A	PREDICTED: protein argonaute 4A-like [Prunus mume]	-	-	-	-	-	-	-
Unigene0018363	55	47	34	225	214	226	1.47	1.13	1.07	5.1	5.34	4.99	1.22333	5.14333	2.07189	3.49384e-14	1.00721e-12	ATL23	PREDICTED: E3 ubiquitin-protein ligase ATL23 [Prunus mume]	-	-	-	-	-	GO:0046872//metal ion binding	-
Unigene0025864	153	159	132	579	661	502	2.26	2.12	2.29	7.26	9.11	6.13	2.22333	7.5	1.75417	3.50368e-14	1.00912e-12	--	hypothetical protein PRUPE_2G054200 [Prunus persica]	-	-	-	-	-	-	-
Unigene0027773	3	23	6	196	230	194	0.03	0.21	0.07	1.69	2.18	1.63	0.103333	1.83333	4.14909	3.50957e-14	1.00988e-12	--	PREDICTED: origin of replication complex subunit 1A-like [Prunus mume]	-	-	-	-	-	-	-
Unigene0026931	163	226	183	1	0	0	3.28	4.11	4.32	0.02	0	0	3.90333	0.00666667	-9.19353	3.56683e-14	1.02542e-12	--	-	-	-	-	-	-	-	-
Unigene0003926	318	388	171	2	8	30	15.73	17.35	9.94	0.08	0.37	1.23	14.34	0.56	-4.67847	3.68843e-14	1.05842e-12	--	-	-	-	-	-	-	-	-
Unigene0022093	0	0	2	253	160	218	0	0	0.03	2.75	1.91	2.31	0.01	2.32333	7.86005	3.69851e-14	1.06034e-12	HSP70	PREDICTED: heat shock cognate 70 kDa protein-like [Malus domestica]	Genetic Information Processing;Genetic Information Processing;Cellular Processes	Folding, sorting and degradation;Transcription;Transport and catabolism	ko04141//Protein processing in endoplasmic reticulum;ko03040//Spliceosome;ko04144//Endocytosis	K03283;K03283;K03283	-	-	-
Unigene0032887	386	384	303	912	897	938	5.12	4.6	4.72	10.28	11.12	10.3	4.81333	10.5667	1.13441	3.70605e-14	1.06153e-12	UTR4	PREDICTED: UDP-galactose/UDP-glucose transporter 4-like [Prunus mume]	-	-	-	-	GO:0031224//intrinsic component of membrane	-	GO:0044763//single-organism cellular process
Unigene0034503	78	56	49	268	300	329	1.12	0.73	0.83	3.27	4.03	3.91	0.893333	3.73667	2.06448	3.75635e-14	1.07495e-12	--	remorin family protein [Populus trichocarpa]	-	-	-	-	-	-	-
Unigene0022615	0	0	0	132	130	146	0	0	0	4.52	4.9	4.87	0.001	4.76333	12.2178	3.81487e-14	1.0907e-12	--	PREDICTED: disease resistance protein RGA2-like, partial [Prunus mume]	-	-	-	-	-	-	-
Unigene0011440	126	79	122	12	6	8	1.98	1.12	2.25	0.16	0.09	0.1	1.78333	0.116667	-3.93411	3.8699e-14	1.10542e-12	--	PREDICTED: uncharacterized protein LOC103330951 isoform X1 [Prunus mume]	-	-	-	-	-	-	-
Unigene0016146	187	161	138	0	2	0	7.44	5.79	6.46	0	0.07	0	6.56333	0.0233333	-8.13589	3.98087e-14	1.13608e-12	--	hypothetical protein PRUPE_5G070000 [Prunus persica]	-	-	-	-	-	-	-
Unigene0015740	97	125	103	0	0	0	7.16	8.34	8.94	0	0	0	8.14667	0.001	-12.992	3.98941e-14	1.13747e-12	bet5	PREDICTED: trafficking protein particle complex subunit 1 isoform X1 [Malus domestica]	-	-	-	-	-	-	GO:0016482//cytoplasmic transport
Unigene0015343	102	112	93	341	321	356	1.92	1.91	2.06	5.46	5.65	5.55	1.96333	5.55333	1.50005	4.01088e-14	1.14255e-12	UBQ8	PREDICTED: ubiquitin-60S ribosomal protein L40-like [Prunus mume]	-	-	-	-	-	-	-
Unigene0026857	4365	9237	5592	10	19	0	52.63	100.65	79.24	0.1	0.21	0	77.5067	0.103333	-9.55087	4.41262e-14	1.25585e-12	VIT_19s0014g04930	PREDICTED: (-)-alpha-pinene synthase-like [Prunus mume]	-	-	-	-	-	-	-
Unigene0027504	0	2	0	216	334	181	0	0.01	0	1.34	2.27	1.09	0.00333333	1.56667	8.87652	4.42911e-14	1.25939e-12	AtMg01250	reverse transcriptase [Corchorus capsularis]	-	-	-	-	-	-	-
Unigene0027591	502	432	416	194	165	187	38.49	29.94	37.49	12.65	11.83	11.88	35.3067	12.12	-1.54255	4.60578e-14	1.30843e-12	--	-	-	-	-	-	-	-	-
Unigene0017413	4793	6850	4528	2872	2473	3378	54.53	70.44	60.55	27.78	26.31	31.83	61.84	28.64	-1.11051	4.74977e-14	1.34811e-12	KCS4	PREDICTED: 3-ketoacyl-CoA synthase 4-like [Prunus mume]	Metabolism;Metabolism;Organismal Systems;Metabolism	Global and overview maps;Global and overview maps;Environmental adaptation;Lipid metabolism	ko01100//Metabolic pathways;ko01110//Biosynthesis of secondary metabolites;ko04626//Plant-pathogen interaction;ko00062//Fatty acid elongation	K15397;K15397;K15397;K15397	-	-	-
Unigene0024923	2475	3225	2153	1350	1020	1620	16.17	19.05	16.54	7.5	6.23	8.77	17.2533	7.5	-1.20191	4.75813e-14	1.34926e-12	RGI3	PREDICTED: LOW QUALITY PROTEIN: probable LRR receptor-like serine/threonine-protein kinase At4g26540 [Prunus mume]	-	-	-	-	GO:0031224//intrinsic component of membrane	GO:0004672//protein kinase activity;GO:0032550//purine ribonucleoside binding	GO:0006464//cellular protein modification process;GO:0006796//phosphate-containing compound metabolic process
Unigene0014630	360	392	295	854	757	1056	4.86	4.78	4.68	9.81	9.56	11.81	4.77333	10.3933	1.12259	4.81115e-14	1.36265e-12	UTR4	UDP-galactose transporter [Prunus persica]	-	-	-	-	GO:0031224//intrinsic component of membrane	-	GO:0044763//single-organism cellular process
Unigene0034138	97	126	74	0	0	5	4.24	4.98	3.81	0	0	0.18	4.34333	0.06	-6.1777	4.81407e-14	1.36265e-12	--	-	-	-	-	-	-	-	-
Unigene0022666	4765	5843	4321	11864	12804	11774	58.06	64.35	61.89	122.93	145.87	118.84	61.4333	129.213	1.07266	4.83257e-14	1.36665e-12	endoub	PREDICTED: poly(U)-specific endoribonuclease-B [Prunus mume]	-	-	-	-	-	GO:0016787//hydrolase activity	-
Unigene0005325	154	166	148	0	2	0	2.78	2.71	3.14	0	0.03	0	2.87667	0.01	-8.16825	5.07741e-14	1.43329e-12	--	-	-	-	-	-	-	-	-
Unigene0009319	2542	3497	2329	1293	744	1368	17.09	21.24	18.4	7.39	4.68	7.62	18.91	6.56333	-1.52665	5.08436e-14	1.43396e-12	FRL4A	PREDICTED: flagellar attachment zone protein 1-like [Malus domestica]	-	-	-	-	-	-	-
Unigene0019933	1140	1222	936	624	550	730	10.05	9.74	9.7	4.68	4.53	5.33	9.83	4.84667	-1.0202	5.13255e-14	1.44624e-12	MLH1	PREDICTED: DNA mismatch repair protein MLH1 isoform X2 [Prunus mume]	Genetic Information Processing	Replication and repair	ko03430//Mismatch repair	K08734	GO:0000785//chromatin;GO:0043231//intracellular membrane-bounded organelle;GO:0043234//protein complex	GO:0003690//double-stranded DNA binding	GO:0000725//recombinational repair;GO:0001101//response to acid chemical;GO:0006260//DNA replication;GO:0006305//DNA alkylation;GO:0006325//chromatin organization;GO:0007059//chromosome segregation;GO:0009793//embryo development ending in seed dormancy;GO:0016458//gene silencing;GO:0048229//gametophyte development;GO:0048827//phyllome development;GO:0051052//regulation of DNA metabolic process;GO…
Unigene0033170	75	110	61	676	278	788	3.56	4.72	3.41	27.31	12.35	31.01	3.89667	23.5567	2.59582	5.14727e-14	1.44908e-12	UGT87A2	PREDICTED: UDP-glycosyltransferase 87A1-like [Prunus mume]	-	-	-	-	-	GO:0016740//transferase activity	-
Unigene0007417	0	4	11	1318	2128	2139	0	0.11	0.41	35.12	62.35	55.52	0.173333	50.9967	8.20071	5.15254e-14	1.44926e-12	--	agglutinin [Amaranthus hypochondriacus]	-	-	-	-	-	-	-
Unigene0030869	606	594	510	281	250	314	8.51	7.54	8.41	3.35	3.28	3.65	8.15333	3.42667	-1.25058	5.37279e-14	1.50985e-12	LNK3	PREDICTED: protein LNK3 isoform X1 [Prunus mume]	-	-	-	-	-	-	-
Unigene0036181	2111	2142	1699	660	771	482	48.22	44.22	45.61	12.82	16.47	9.12	46.0167	12.8033	-1.84564	5.54156e-14	1.55395e-12	PMEI3	PREDICTED: 21 kDa protein [Prunus mume]	-	-	-	-	-	GO:0052689//carboxylic ester hydrolase activity	GO:0009892//negative regulation of metabolic process
Unigene0022572	0	0	0	121	122	157	0	0	0	2.48	2.75	3.14	0.001	2.79	11.446	5.54467e-14	1.55395e-12	--	hypothetical protein PRUPE_6G186900 [Prunus persica]	-	-	-	-	-	-	-
Unigene0024189	0	0	0	211	70	272	0	0	0	5.05	1.84	6.34	0.001	4.41	12.1066	5.5819e-14	1.56298e-12	--	-	-	-	-	-	-	-	-
Unigene0010801	175	171	126	2	0	0	2.72	2.4	2.3	0.03	0	0	2.47333	0.01	-7.95031	5.66144e-14	1.58383e-12	--	Retrovirus-related Pol polyprotein from transposon TNT 1-94 [Cajanus cajan]	-	-	-	-	-	-	-
Unigene0000141	211	165	161	28	39	24	6.66	4.7	5.97	0.75	1.15	0.63	5.77667	0.843333	-2.77606	5.66927e-14	1.5846e-12	DSC1	PREDICTED: probable disease resistance protein RPP1 [Prunus mume]	-	-	-	-	-	-	-
Unigene0022898	20	31	29	170	270	220	0.8	1.12	1.37	5.8	10.13	7.32	1.09667	7.75	2.82107	5.78898e-14	1.61662e-12	CDC20-1	PREDICTED: LOW QUALITY PROTEIN: cell division cycle 20.2, cofactor of APC complex-like [Prunus mume]	Genetic Information Processing	Folding, sorting and degradation	ko04120//Ubiquitin mediated proteolysis	K03363	-	-	-
Unigene0035351	130	122	75	0	0	0	9.09	7.71	6.16	0	0	0	7.65333	0.001	-12.9019	6.06263e-14	1.69152e-12	--	PREDICTED: hydrophobic protein RCI2B-like [Malus domestica]	-	-	-	-	-	-	-
Unigene0019266	190	163	122	0	1	1	8.53	6.62	6.44	0	0.04	0.04	7.19667	0.0266667	-8.07615	6.15249e-14	1.71506e-12	--	PREDICTED: LRR receptor-like serine/threonine-protein kinase GSO2 [Prunus mume]	-	-	-	-	-	-	-
Unigene0022978	922	1081	736	279	382	302	14.49	15.36	13.6	3.73	5.61	3.93	14.4833	4.42333	-1.71119	6.16608e-14	1.71732e-12	PMAT1	PREDICTED: phenolic glucoside malonyltransferase 1-like isoform X1 [Prunus mume]	-	-	-	-	-	-	-
Unigene0009943	142	195	129	19	11	35	1.73	2.15	1.85	0.2	0.13	0.35	1.91	0.226667	-3.07493	6.31028e-14	1.75591e-12	--	PREDICTED: uncharacterized mitochondrial protein AtMg00810-like [Prunus mume]	-	-	-	-	-	-	-
Unigene0000523	259	267	173	17	0	19	10.31	9.61	8.1	0.58	0	0.63	9.34	0.403333	-4.53338	6.31739e-14	1.75632e-12	--	-	-	-	-	-	-	-	-
Unigene0027006	0	0	0	146	99	158	0	0	0	1.47	1.1	1.55	0.001	1.37333	10.4235	6.35838e-14	1.76615e-12	--	PREDICTED: uncharacterized protein LOC103334710 [Prunus mume]	-	-	-	-	-	-	-
Unigene0026504	39	44	19	205	315	250	0.57	0.58	0.33	2.56	4.32	3.04	0.493333	3.30667	2.74474	6.49268e-14	1.80025e-12	--	hypothetical protein PRUPE_3G204800 [Prunus persica]	-	-	-	-	-	-	-
Unigene0000774	214	204	168	59	42	67	2.39	2.06	2.21	0.56	0.44	0.62	2.22	0.54	-2.03953	6.50589e-14	1.80231e-12	At5g40240	PREDICTED: WAT1-related protein At5g40240-like [Prunus mume]	-	-	-	-	-	-	-
Unigene0031297	91	95	77	2	2	0	3.4	3.21	3.38	0.06	0.07	0	3.33	0.0433333	-6.2639	6.57889e-14	1.82092e-12	UBC32	PREDICTED: ubiquitin-conjugating enzyme E2 32-like [Prunus mume]	Genetic Information Processing;Genetic Information Processing	Folding, sorting and degradation;Folding, sorting and degradation	ko04141//Protein processing in endoplasmic reticulum;ko04120//Ubiquitin mediated proteolysis	K10578;K10578	GO:0016020//membrane;GO:0044444//cytoplasmic part	GO:0016874//ligase activity	GO:0006511//ubiquitin-dependent protein catabolic process;GO:0031668//cellular response to extracellular stimulus;GO:0033554//cellular response to stress;GO:0042221//response to chemical;GO:0044249//cellular biosynthetic process;GO:0044255//cellular lipid metabolic process;GO:0044712//single-organism catabolic process;GO:0090304//nucleic acid metabolic process;GO:1901576//organic substance biosyn…
Unigene0028929	488	833	493	192	122	233	4.9	7.56	5.82	1.64	1.15	1.94	6.09333	1.57667	-1.95035	6.63173e-14	1.83392e-12	--	-	-	-	-	-	-	-	-
Unigene0027262	477	1263	626	31	44	140	4.72	11.3	7.29	0.26	0.41	1.15	7.77	0.606667	-3.67894	6.64167e-14	1.83504e-12	BAT1	PREDICTED: amino-acid permease BAT1 homolog [Fragaria vesca subsp. vesca] [Fragaria vesca]	-	-	-	-	GO:0031224//intrinsic component of membrane	GO:0046943//carboxylic acid transmembrane transporter activity	-
Unigene0001776	153	176	127	0	1	1	17.37	18.06	16.95	0	0.11	0.09	17.46	0.0666667	-8.03287	6.6532e-14	1.8366e-12	--	-	-	-	-	-	-	-	-
Unigene0010308	109	168	113	453	377	471	0.57	0.8	0.7	2.03	1.86	2.06	0.69	1.98333	1.52326	6.69651e-14	1.84679e-12	RE1	OSIGBa0134J07.9 [Oryza sativa Indica Group]	Metabolism;Metabolism;Metabolism;Genetic Information Processing	Global and overview maps;Nucleotide metabolism;Nucleotide metabolism;Transcription	ko01100//Metabolic pathways;ko00230//Purine metabolism;ko00240//Pyrimidine metabolism;ko03020//RNA polymerase	K03006;K03006;K03006;K03006	-	-	-
Unigene0007637	11797	15940	11078	7781	5453	7976	53.97	65.9	59.56	30.27	23.32	30.22	59.81	27.9367	-1.09823	6.70194e-14	1.84679e-12	HACL	PREDICTED: 2-hydroxyacyl-CoA lyase [Prunus mume]	Cellular Processes	Transport and catabolism	ko04146//Peroxisome	K12261	-	GO:0003824//catalytic activity;GO:0019842//vitamin binding	-
Unigene0032169	143	106	80	0	0	0	6.37	4.27	4.19	0	0	0	4.94333	0.001	-12.2713	6.93012e-14	1.90798e-12	--	PREDICTED: tetraspanin-2 [Prunus mume]	-	-	-	-	-	-	-
Unigene0030820	43	30	50	415	200	392	0.39	0.24	0.53	3.18	1.68	2.92	0.386667	2.59333	2.74565	7.05406e-14	1.9404e-12	--	PREDICTED: uncharacterized protein LOC103408322 [Malus domestica]	-	-	-	-	-	-	-
Unigene0019524	64	56	69	283	286	312	0.89	0.7	1.13	3.35	3.72	3.6	0.906667	3.55667	1.97188	7.45879e-14	2.04812e-12	ORP4C	PREDICTED: oxysterol-binding protein-related protein 4B [Prunus mume]	-	-	-	-	-	-	-
Unigene0024007	109	80	68	403	288	483	1.26	0.84	0.93	3.97	3.12	4.64	1.01	3.91	1.95281	8.00821e-14	2.19512e-12	CPK17	PREDICTED: calcium-dependent protein kinase 26-like [Prunus mume]	-	-	-	-	-	GO:0004672//protein kinase activity;GO:0032550//purine ribonucleoside binding	GO:0006468//protein phosphorylation
Unigene0033121	100	105	98	0	0	0	8.28	7.86	9.54	0	0	0	8.56	0.001	-13.0634	8.28e-14	2.26763e-12	--	PREDICTED: disease resistance protein TAO1-like isoform X1 [Prunus mume]	-	-	-	-	-	-	-
Unigene0004057	794	772	655	411	351	419	13.58	11.94	13.17	5.98	5.61	5.94	12.8967	5.84333	-1.14213	8.31549e-14	2.27536e-12	--	PREDICTED: uncharacterized protein LOC103322262 [Prunus mume]	-	-	-	-	-	-	-
Unigene0000380	89	122	93	0	0	0	1.92	2.37	2.35	0	0	0	2.21333	0.001	-11.112	9.0555e-14	2.47351e-12	--	hypothetical protein PRUPE_2G053600 [Prunus persica]	-	-	-	-	-	-	-
Unigene0033251	219	305	210	674	580	768	2.51	3.16	2.83	6.57	6.22	7.29	2.83333	6.69333	1.24022	9.12339e-14	2.48987e-12	LCY1	PREDICTED: lycopene beta cyclase, chloroplastic/chromoplastic [Prunus mume]	Metabolism;Metabolism;Metabolism	Global and overview maps;Global and overview maps;Metabolism of terpenoids and polyketides	ko01100//Metabolic pathways;ko01110//Biosynthesis of secondary metabolites;ko00906//Carotenoid biosynthesis	K06443;K06443;K06443	-	GO:0016491//oxidoreductase activity	GO:0044710//single-organism metabolic process
Unigene0018402	601	612	491	1708	1197	1440	6.75	6.21	6.48	16.31	12.57	13.4	6.48	14.0933	1.12095	9.15911e-14	2.49744e-12	PYROXD2	PREDICTED: pyridine nucleotide-disulfide oxidoreductase domain-containing protein 2 [Prunus mume]	-	-	-	-	-	-	GO:0044710//single-organism metabolic process
Unigene0018994	1	1	0	242	139	221	0.02	0.02	0	3.62	2.28	3.22	0.0133333	3.04	7.83289	9.20466e-14	2.50767e-12	WAKL1	PREDICTED: wall-associated receptor kinase-like 6 [Prunus mume]	-	-	-	-	-	-	-
Unigene0019620	306	441	284	65	79	125	3.56	4.64	3.88	0.64	0.86	1.2	4.02667	0.9	-2.16159	9.25838e-14	2.5201e-12	ANTR1	PREDICTED: sodium-dependent phosphate transport protein 1, chloroplastic [Prunus mume]	-	-	-	-	-	-	GO:0044763//single-organism cellular process
Unigene0028648	1442	1807	1395	690	771	684	34.56	39.14	39.3	14.06	17.28	13.58	37.6667	14.9733	-1.33089	9.67722e-14	2.63182e-12	MAG	PREDICTED: DNA-3-methyladenine glycosylase [Prunus mume]	Genetic Information Processing	Replication and repair	ko03410//Base excision repair	K03652	-	GO:0043733//DNA-3-methylbase glycosylase activity	GO:0006281//DNA repair
Unigene0032145	198	165	154	0	1	0	11.72	8.82	10.71	0	0.06	0	10.4167	0.02	-9.02468	1.0188e-13	2.76832e-12	--	PREDICTED: disease resistance-like protein CSA1 [Prunus mume]	-	-	-	-	-	-	-
Unigene0036032	117	108	78	0	0	0	9.43	7.86	7.39	0	0	0	8.22667	0.001	-13.0061	1.02854e-13	2.79236e-12	--	PREDICTED: probable disease resistance protein RPP1 [Prunus mume]	-	-	-	-	-	-	-
Unigene0026856	0	2	0	179	262	187	0	0.07	0	6.17	9.93	6.28	0.0233333	7.46	8.32064	1.06204e-13	2.8808e-12	GDS	PREDICTED: (-)-alpha-pinene synthase-like [Prunus mume]	Metabolism	Metabolism of terpenoids and polyketides	ko00909//Sesquiterpenoid and triterpenoid biosynthesis	K15803	-	-	-
Unigene0026945	81	135	93	0	0	0	2.76	4.16	3.73	0	0	0	3.55	0.001	-11.7936	1.13498e-13	3.07596e-12	--	hypothetical protein PRUPE_8G047400 [Prunus persica]	-	-	-	-	-	-	-
Unigene0021180	182	147	128	39	24	32	6.91	5.04	5.71	1.26	0.85	1.01	5.88667	1.04	-2.50087	1.14889e-13	3.11096e-12	--	PREDICTED: disease resistance protein RPM1-like [Prunus mume]	Organismal Systems	Environmental adaptation	ko04626//Plant-pathogen interaction	K13457	-	-	-
Unigene0035857	856	970	672	439	330	497	5.7	5.84	5.26	2.49	2.05	2.74	5.6	2.42667	-1.20645	1.19241e-13	3.22601e-12	PSKR2	PREDICTED: phytosulfokine receptor 2 [Prunus mume]	-	-	-	-	GO:0009536//plastid;GO:0031224//intrinsic component of membrane	GO:0004672//protein kinase activity;GO:0016628//oxidoreductase activity, acting on the CH-CH group of donors, NAD or NADP as acceptor;GO:0016791//phosphatase activity;GO:0032550//purine ribonucleoside binding;GO:0038023//signaling receptor activity	GO:0006464//cellular protein modification process;GO:0006796//phosphate-containing compound metabolic process;GO:0006950//response to stress;GO:0044710//single-organism metabolic process;GO:0050794//regulation of cellular process
Unigene0024943	107	72	83	4	2	0	2.8	1.7	2.55	0.09	0.05	0	2.35	0.0466667	-5.65412	1.21232e-13	3.27703e-12	--	peptidase [Medicago truncatula]	-	-	-	-	-	-	-
Unigene0031596	6	2	2	92	77	148	0.28	0.09	0.11	3.69	3.4	5.79	0.16	4.29333	4.74595	1.22849e-13	3.31585e-12	--	PREDICTED: N6-adenosine-methyltransferase MT-A70-like, partial [Prunus mume]	-	-	-	-	-	-	-
Unigene0021459	75	127	115	0	0	0	0.9	1.37	1.62	0	0	0	1.29667	0.001	-10.3406	1.2288e-13	3.31585e-12	--	PREDICTED: plant UBX domain-containing protein 13-like [Prunus mume]	-	-	-	-	-	-	-
Unigene0018300	354	381	281	121	54	68	3.33	3.24	3.11	0.97	0.47	0.53	3.22667	0.656667	-2.29681	1.24332e-13	3.35213e-12	MCM8	PREDICTED: probable DNA helicase MCM8 [Prunus mume]	-	-	-	-	-	GO:0003676//nucleic acid binding;GO:0017111//nucleoside-triphosphatase activity;GO:0032550//purine ribonucleoside binding	GO:0000725//recombinational repair;GO:0006260//DNA replication;GO:0007126//meiotic nuclear division;GO:0048229//gametophyte development
Unigene0010993	395	461	302	56	111	88	7.13	7.52	6.41	0.86	1.87	1.32	7.02	1.35	-2.37851	1.25628e-13	3.38416e-12	--	PREDICTED: glycine-rich protein A3-like [Prunus mume]	-	-	-	-	-	-	-
Unigene0006653	0	0	0	140	209	97	0	0	0	4.44	7.28	2.99	0.001	4.90333	12.2595	1.26119e-13	3.39444e-12	--	PREDICTED: protein LSM12 homolog [Prunus mume]	-	-	-	-	-	-	-
Unigene0012990	0	0	0	139	91	152	0	0	0	1.78	1.28	1.89	0.001	1.65	10.6883	1.28811e-13	3.46392e-12	At4g19940	F-box [Prunus mume]	-	-	-	-	-	-	-
Unigene0022230	0	0	0	108	146	129	0	0	0	1.55	2.3	1.8	0.001	1.88333	10.8791	1.34151e-13	3.60442e-12	TMK4	PREDICTED: receptor-like kinase TMK4 [Prunus mume]	-	-	-	-	-	GO:0004672//protein kinase activity;GO:0032550//purine ribonucleoside binding	GO:0006464//cellular protein modification process;GO:0006796//phosphate-containing compound metabolic process
Unigene0023291	92	102	98	0	0	0	0.57	0.58	0.72	0	0	0	0.623333	0.001	-9.28386	1.35263e-13	3.63116e-12	GIP	T4.5 [Malus x robusta]	-	-	-	-	-	-	-
Unigene0030495	0	0	1	204	294	196	0	0	0.02	3.13	4.96	2.93	0.00666667	3.67333	9.10591	1.37209e-13	3.68024e-12	--	hypothetical protein PRUPE_8G221000 [Prunus persica]	-	-	-	-	-	-	-
Unigene0032008	95	97	102	0	0	0	1.37	1.26	1.73	0	0	0	1.45333	0.001	-10.5051	1.37378e-13	3.68162e-12	--	PREDICTED: pre-mRNA-splicing factor cef1-like [Prunus mume]	Genetic Information Processing	Transcription	ko03040//Spliceosome	K12860	-	-	-
Unigene0018223	127	130	134	663	368	618	1.21	1.12	1.5	5.37	3.28	4.88	1.27667	4.51	1.82075	1.39539e-13	3.73633e-12	BOR4	PREDICTED: boron transporter 4 [Prunus mume]	-	-	-	-	GO:0031224//intrinsic component of membrane	-	GO:0006820//anion transport
Unigene0001777	0	0	1	217	287	186	0	0	0.08	13.33	19.39	11.13	0.0266667	14.6167	9.09836	1.40057e-13	3.74698e-12	--	hypothetical protein PRUPE_ppa014941mg [Prunus persica]	-	-	-	-	-	-	-
Unigene0010576	810	901	704	495	405	485	9.01	9.06	9.21	4.68	4.21	4.47	9.09333	4.45333	-1.02992	1.40513e-13	3.75595e-12	--	Galactose mutarotase-like superfamily protein [Theobroma cacao]	Metabolism;Metabolism;Metabolism	Global and overview maps;Global and overview maps;Carbohydrate metabolism	ko01100//Metabolic pathways;ko01110//Biosynthesis of secondary metabolites;ko00010//Glycolysis / Gluconeogenesis	K01792;K01792;K01792	-	GO:0003824//catalytic activity;GO:0005488//binding	GO:0044238//primary metabolic process
Unigene0017277	376	276	257	1084	858	989	4.3	2.85	3.45	10.53	9.17	9.36	3.53333	9.68667	1.45497	1.47472e-13	3.93859e-12	--	PREDICTED: acyl-protein thioesterase 2 [Fragaria vesca subsp. vesca] [Fragaria vesca]	Metabolism	Lipid metabolism	ko00564//Glycerophospholipid metabolism	K06130	-	GO:0016788//hydrolase activity, acting on ester bonds	-
Unigene0026543	233	322	312	83	46	41	3.71	4.64	5.85	1.13	0.69	0.54	4.73333	0.786667	-2.58903	1.54183e-13	4.1143e-12	NAC043	PREDICTED: NAC domain-containing protein 43-like [Prunus mume]	-	-	-	-	GO:0043231//intracellular membrane-bounded organelle	-	GO:0006355//regulation of transcription, DNA-templated;GO:0042546//cell wall biogenesis;GO:0044711//single-organism biosynthetic process;GO:0044763//single-organism cellular process;GO:0045491//xylan metabolic process
Unigene0011777	1058	1089	885	508	527	514	22.47	20.9	22.09	9.17	10.46	9.04	21.82	9.55667	-1.19107	1.5508e-13	4.13453e-12	SDR1	PREDICTED: (+)-neomenthol dehydrogenase-like isoform X2 [Prunus mume]	Metabolism;Metabolism	Global and overview maps;Metabolism of terpenoids and polyketides	ko01110//Biosynthesis of secondary metabolites;ko00902//Monoterpenoid biosynthesis	K15095;K15095	-	GO:0016616//oxidoreductase activity, acting on the CH-OH group of donors, NAD or NADP as acceptor	GO:0044710//single-organism metabolic process
Unigene0005051	2786	2897	2326	1704	1138	1594	25.48	23.95	25.01	13.25	9.73	12.08	24.8133	11.6867	-1.08625	1.55206e-13	4.13453e-12	IDD5	PREDICTED: protein indeterminate-domain 4, chloroplastic [Prunus mume]	-	-	-	-	-	-	-
Unigene0032503	695	847	678	331	356	338	7.79	8.58	8.93	3.16	3.73	3.14	8.43333	3.34333	-1.33482	1.55707e-13	4.14434e-12	LSI2	Divalent ion symporter isoform 1 [Theobroma cacao]	-	-	-	-	-	-	GO:0044763//single-organism cellular process
Unigene0025048	2394	1537	1502	6161	5822	6297	38.24	22.19	28.2	83.68	86.94	83.31	29.5433	84.6433	1.51856	1.59569e-13	4.24326e-12	AED3	PREDICTED: aspartyl protease AED3 [Prunus mume]	-	-	-	-	GO:0005576//extracellular region;GO:0005618//cell wall	GO:0004175//endopeptidase activity	GO:0019538//protein metabolic process
Unigene0002217	474	567	394	245	211	230	4.18	4.51	4.08	1.84	1.74	1.68	4.25667	1.75333	-1.27962	1.59695e-13	4.24326e-12	At3g10130	PREDICTED: heme-binding-like protein At3g10130, chloroplastic [Prunus mume]	-	-	-	-	GO:0044434//chloroplast part	-	-
Unigene0006016	1058	774	773	158	159	335	49.96	33.03	42.9	6.34	7.02	13.1	41.9633	8.82	-2.25028	1.60269e-13	4.25491e-12	--	PREDICTED: 5'-adenylylsulfate reductase 1, chloroplastic-like [Prunus mume]	-	-	-	-	-	-	-
Unigene0027801	391	485	338	149	111	196	4.63	5.19	4.71	1.5	1.23	1.92	4.84333	1.55	-1.64373	1.65465e-13	4.3891e-12	--	PREDICTED: uncharacterized protein LOC103405083 [Malus domestica]	-	-	-	-	-	-	-
Unigene0022721	1	2	1	140	115	84	0.08	0.14	0.09	9.34	8.43	5.46	0.103333	7.74333	6.22758	1.70603e-13	4.52155e-12	--	PREDICTED: uncharacterized transmembrane protein DDB_G0289901-like [Prunus mume]	-	-	-	-	-	-	-
Unigene0036602	224	231	192	67	67	83	2.11	1.97	2.13	0.54	0.59	0.65	2.07	0.593333	-1.80272	1.73309e-13	4.58938e-12	LECRK3	PREDICTED: G-type lectin S-receptor-like serine/threonine-protein kinase RLK1 [Prunus mume]	-	-	-	-	-	GO:0016772//transferase activity, transferring phosphorus-containing groups	GO:0009987//cellular process
Unigene0021171	0	0	0	157	142	94	0	0	0	8	7.95	4.67	0.001	6.87333	12.7468	1.74962e-13	4.62922e-12	--	hypothetical protein PRUPE_2G081500 [Prunus persica]	-	-	-	-	-	-	-
Unigene0025729	0	0	0	131	95	135	0	0	0	1.61	1.28	1.62	0.001	1.50333	10.5539	1.76427e-13	4.65605e-12	SBT1.7	PREDICTED: subtilisin-like protease SBT1.8 [Pyrus x bretschneideri]	-	-	-	-	-	-	-
Unigene0012546	1055	1268	929	642	493	700	8.51	9.24	8.81	4.4	3.72	4.68	8.85333	4.26667	-1.05311	1.7643e-13	4.65605e-12	Os03g0733400	transposase [Saintpaulia hybrid cultivar]	-	-	-	-	-	-	-
Unigene0009860	0	0	0	119	110	126	0	0	0	4.09	4.16	4.22	0.001	4.15667	12.0212	1.76482e-13	4.65605e-12	--	hypothetical protein PRUPE_ppb015759mg, partial [Prunus persica]	-	-	-	-	-	-	-
Unigene0028700	82	132	82	0	0	0	4.76	6.92	5.59	0	0	0	5.75667	0.001	-12.491	1.76572e-13	4.65605e-12	--	-	-	-	-	-	-	-	-
Unigene0020214	81	111	98	0	0	0	2	2.47	2.84	0	0	0	2.43667	0.001	-11.2507	1.77554e-13	4.67797e-12	--	-	-	-	-	-	-	-	-
Unigene0026335	60	84	89	2	2	2	3.53	4.47	6.16	0.1	0.11	0.1	4.72	0.103333	-5.51341	1.91411e-13	5.03459e-12	--	hypothetical protein PRUPE_1G564200 [Prunus persica]	-	-	-	-	-	-	-
Unigene0016365	153	213	126	0	1	0	7.59	9.54	7.34	0	0.05	0	8.15667	0.0166667	-8.93487	1.97125e-13	5.18051e-12	--	PREDICTED: TMV resistance protein N-like [Prunus mume]	-	-	-	-	-	-	-
Unigene0003804	2031	2389	1899	7404	8768	5765	33.31	35.41	36.61	103.26	134.45	78.32	35.11	105.343	1.58515	2.00431e-13	5.26295e-12	SAUR72	PREDICTED: auxin-responsive protein SAUR71 [Pyrus x bretschneideri]	Environmental Information Processing	Signal transduction	ko04075//Plant hormone signal transduction	K14488	-	-	-
Unigene0019652	402	349	404	71	21	85	4.46	3.5	5.27	0.67	0.22	0.78	4.41	0.556667	-2.98589	2.01392e-13	5.28375e-12	RAP2-7	PREDICTED: ethylene-responsive transcription factor RAP2-7 isoform X1 [Prunus mume]	-	-	-	-	-	-	GO:0010467//gene expression;GO:0034645//cellular macromolecule biosynthetic process
Unigene0023502	90	118	76	0	0	0	2.99	3.55	2.97	0	0	0	3.17	0.001	-11.6303	2.02652e-13	5.31234e-12	--	-	-	-	-	-	-	-	-
Unigene0007675	2024	2167	1766	1148	1133	1135	18.28	17.68	18.74	8.81	9.56	8.49	18.2333	8.95333	-1.02608	2.0495e-13	5.36527e-12	MEMB11	PREDICTED: membrin-11-like [Prunus mume]	Genetic Information Processing	Folding, sorting and degradation	ko04130//SNARE interactions in vesicular transport	K08496	GO:0005794//Golgi apparatus	-	GO:0051234//establishment of localization
Unigene0026097	189	142	114	0	2	0	3.6	2.44	2.55	0	0.04	0	2.86333	0.0133333	-7.74651	2.05015e-13	5.36527e-12	--	PREDICTED: LOW QUALITY PROTEIN: probable serine/threonine-protein kinase abkC [Prunus mume]	-	-	-	-	-	-	-
Unigene0021099	85	39	79	570	384	496	1.71	0.71	1.87	9.76	7.23	8.27	1.43	8.42	2.55781	2.09355e-13	5.47427e-12	NAC021	PREDICTED: NAC domain-containing protein 21/22 [Prunus mume]	-	-	-	-	GO:0043231//intracellular membrane-bounded organelle	-	GO:0010468//regulation of gene expression;GO:0034645//cellular macromolecule biosynthetic process
Unigene0015555	0	0	2	234	149	172	0	0	0.04	3.72	2.61	2.67	0.0133333	3	7.81378	2.10113e-13	5.4895e-12	--	PREDICTED: uncharacterized protein LOC103344535 [Prunus mume]	-	-	-	-	-	-	-
Unigene0031176	914	1267	837	450	481	497	13.32	16.69	14.34	5.58	6.56	6	14.7833	6.04667	-1.28976	2.10767e-13	5.50196e-12	--	AT1G65230-like protein, partial [Prunus persica]	-	-	-	-	GO:0009536//plastid	-	GO:0005982//starch metabolic process;GO:0006090//pyruvate metabolic process;GO:0009658//chloroplast organization;GO:0009668//plastid membrane organization;GO:0016070//RNA metabolic process;GO:0016109//tetraterpenoid biosynthetic process;GO:0019758//glycosinolate biosynthetic process
Unigene0025357	290	304	183	87	46	73	19.48	18.46	14.45	4.97	2.89	4.06	17.4633	3.97333	-2.13591	2.20035e-13	5.7391e-12	--	-	-	-	-	-	-	-	-
Unigene0036566	81	109	92	0	0	0	2.75	3.35	3.67	0	0	0	3.25667	0.001	-11.6692	2.21335e-13	5.76821e-12	--	hypothetical protein PRUPE_1G564200 [Prunus persica]	-	-	-	-	-	-	-
Unigene0027343	1388	1402	1187	515	440	770	14.22	12.98	14.29	4.49	4.21	6.53	13.83	5.07667	-1.44585	2.25322e-13	5.8672e-12	ST3	PREDICTED: low affinity sulfate transporter 3 [Prunus mume]	-	-	-	-	GO:0031224//intrinsic component of membrane	GO:0015103//inorganic anion transmembrane transporter activity;GO:0015291//secondary active transmembrane transporter activity	GO:0008272//sulfate transport;GO:0044763//single-organism cellular process
Unigene0035494	339	290	240	97	81	120	4.53	3.5	3.77	1.1	1.01	1.33	3.93333	1.14667	-1.77831	2.25843e-13	5.87588e-12	At4g08300	PREDICTED: WAT1-related protein At4g08300-like [Prunus mume]	-	-	-	-	-	-	-
Unigene0011733	0	0	0	159	82	137	0	0	0	12.69	7.2	10.65	0.001	10.18	13.3134	2.28733e-13	5.9461e-12	--	-	-	-	-	-	-	-	-
Unigene0026636	223	220	176	630	854	741	5.81	5.18	5.39	13.96	20.81	16	5.46	16.9233	1.63204	2.30353e-13	5.98323e-12	--	hypothetical protein PRUPE_3G031300 [Prunus persica]	-	-	-	-	-	-	-
Unigene0013523	93	90	98	0	0	0	2.03	1.78	2.52	0	0	0	2.11	0.001	-11.043	2.38504e-13	6.18979e-12	--	hypothetical protein PRUPE_ppb018185mg [Prunus persica]	-	-	-	-	-	-	-
Unigene0002752	7253	10359	7202	4248	3953	5287	57.1	73.71	66.64	28.44	29.1	34.48	65.8167	30.6733	-1.10147	2.43558e-13	6.31048e-12	--	Nucleolar protein gar2-related isoform 1 [Theobroma cacao]	-	-	-	-	-	-	-
Unigene0006551	205	146	149	13	9	0	4.23	2.72	3.61	0.23	0.17	0	3.52	0.133333	-4.72247	2.47645e-13	6.41106e-12	DOGL4	PREDICTED: transcription factor TGA5-like, partial [Malus domestica]	-	-	-	-	-	GO:0003677//DNA binding	GO:0034645//cellular macromolecule biosynthetic process
Unigene0008431	107	93	78	0	0	0	4.71	3.7	4.03	0	0	0	4.14667	0.001	-12.0177	2.54011e-13	6.56496e-12	--	PREDICTED: uncharacterized protein LOC103330455 [Prunus mume]	-	-	-	-	-	-	-
Unigene0026959	120	89	77	0	0	0	11.87	7.96	8.96	0	0	0	9.59667	0.001	-13.2283	2.62765e-13	6.78559e-12	--	PREDICTED: anaphase-promoting complex subunit 5 [Prunus mume]	Genetic Information Processing	Folding, sorting and degradation	ko04120//Ubiquitin mediated proteolysis	K03352	-	-	-
Unigene0010189	0	0	0	147	111	101	0	0	0	3.83	3.18	2.56	0.001	3.19	11.6393	2.65249e-13	6.84409e-12	--	PREDICTED: intron-binding protein aquarius [Prunus mume]	Genetic Information Processing	Transcription	ko03040//Spliceosome	K12874	-	-	-
Unigene0003114	526	631	494	298	204	279	6.83	7.41	7.54	3.29	2.48	3	7.26	2.92333	-1.31236	2.65929e-13	6.85597e-12	RE	PREDICTED: protein RETICULATA, chloroplastic [Prunus mume]	-	-	-	-	-	-	-
Unigene0034791	313	300	239	721	729	797	3.83	3.32	3.44	7.51	8.35	8.09	3.53	7.98333	1.17732	2.69614e-13	6.94522e-12	IPK	PREDICTED: glutamate 5-kinase isoform X2 [Prunus mume]	-	-	-	-	-	GO:0016772//transferase activity, transferring phosphorus-containing groups	GO:0006520//cellular amino acid metabolic process;GO:0006796//phosphate-containing compound metabolic process
Unigene0036377	119	104	138	975	993	497	5.12	4.05	6.98	35.69	39.96	17.72	5.38333	31.1233	2.53142	2.82414e-13	7.26298e-12	--	Phototropic-responsive NPH3 family protein isoform 1 [Theobroma cacao]	-	-	-	-	-	-	-
Unigene0001738	68	121	107	0	0	0	1.26	2.03	2.34	0	0	0	1.87667	0.001	-10.874	2.93703e-13	7.54707e-12	--	-	-	-	-	-	-	-	-
Unigene0004442	0	0	0	125	150	96	0	0	0	10.74	14.17	8.04	0.001	10.9833	13.423	2.97528e-13	7.63909e-12	--	auxin signaling F-box protein 2 [Prunus salicina]	-	-	-	-	-	-	-
Unigene0032177	0	0	0	93	193	121	0	0	0	5.21	11.89	6.6	0.001	7.9	12.9476	3.03295e-13	7.78075e-12	--	-	-	-	-	-	-	-	-
Unigene0004538	152	74	87	0	0	0	6.43	2.83	4.32	0	0	0	4.52667	0.001	-12.1442	3.21657e-13	8.24503e-12	--	hypothetical protein PRUPE_1G026300 [Prunus persica]	-	-	-	-	-	-	-
Unigene0027926	0	0	0	101	142	115	0	0	0	4.56	7.05	5.06	0.001	5.55667	12.44	3.27857e-13	8.39706e-12	--	-	-	-	-	-	-	-	-
Unigene0004684	201	231	124	12	29	9	4.71	4.9	3.42	0.24	0.64	0.17	4.34333	0.35	-3.63338	3.3223e-13	8.5021e-12	--	PREDICTED: putative calcium-transporting ATPase 11, plasma membrane-type [Prunus mume]	-	-	-	-	-	-	-
Unigene0024093	23	20	17	120	154	173	0.56	0.44	0.49	2.5	3.53	3.52	0.496667	3.18333	2.68019	3.38702e-13	8.66061e-12	--	PREDICTED: coiled-coil domain-containing protein 94 homolog [Prunus mume]	-	-	-	-	-	-	-
Unigene0026260	2856	4075	2479	846	873	1575	29.06	37.47	29.64	7.32	8.3	13.27	32.0567	9.63	-1.73502	3.41404e-13	8.72257e-12	PME44	PREDICTED: pectinesterase/pectinesterase inhibitor PPE8B [Prunus mume]	Metabolism;Metabolism	Global and overview maps;Carbohydrate metabolism	ko01100//Metabolic pathways;ko00040//Pentose and glucuronate interconversions	K01051;K01051	GO:0030312//external encapsulating structure	GO:0052689//carboxylic ester hydrolase activity	GO:0000272//polysaccharide catabolic process;GO:0009892//negative regulation of metabolic process;GO:0071555//cell wall organization
Unigene0018909	356	392	294	75	117	79	9.58	9.54	9.3	1.72	2.94	1.76	9.47333	2.14	-2.14626	3.67952e-13	9.38547e-12	IBH1	PREDICTED: transcription factor IBH1-like [Prunus mume]	-	-	-	-	-	-	-
Unigene0019160	328	375	253	74	109	82	7.85	8.11	7.12	1.51	2.44	1.63	7.69333	1.86	-2.04831	3.72784e-13	9.50097e-12	--	PREDICTED: uncharacterized protein LOC103333637 [Prunus mume]	-	-	-	-	-	-	-
Unigene0030047	6	2	3	116	69	99	0.05	0.02	0.03	0.89	0.58	0.74	0.0333333	0.736667	4.46597	3.81772e-13	9.7221e-12	RLP7	PREDICTED: receptor-like protein 12 [Fragaria vesca subsp. vesca] [Fragaria vesca]	-	-	-	-	-	-	-
Unigene0000022	229	224	236	1017	1364	834	3.92	3.47	4.75	14.81	21.85	11.83	4.04667	16.1633	1.99792	3.85093e-13	9.79868e-12	--	PREDICTED: uncharacterized protein LOC103330354 [Prunus mume]	-	-	-	-	-	-	-
Unigene0000243	73	101	104	0	0	0	5.92	7.4	9.91	0	0	0	7.74333	0.001	-12.9187	4.00217e-13	1.01752e-11	RPM1	PREDICTED: disease resistance protein RPM1-like [Prunus mume]	Organismal Systems	Environmental adaptation	ko04626//Plant-pathogen interaction	K13457	-	-	-
Unigene0035888	43	66	37	401	209	780	0.54	0.75	0.55	4.29	2.46	8.13	0.613333	4.96	3.0156	4.16719e-13	1.05862e-11	GLOX1	PREDICTED: WSC domain-containing protein ARB_07867-like [Prunus mume]	-	-	-	-	-	-	-
Unigene0011024	2741	3216	2124	746	1161	1008	29.05	30.81	26.46	6.72	11.5	8.85	28.7733	9.02333	-1.673	4.18272e-13	1.0617e-11	At3g50280	PREDICTED: uncharacterized acetyltransferase At3g50280-like [Prunus mume]	-	-	-	-	-	-	-
Unigene0000794	93	110	66	0	0	0	1.61	1.72	1.35	0	0	0	1.56	0.001	-10.6073	4.19208e-13	1.06321e-11	HST	PREDICTED: shikimate O-hydroxycinnamoyltransferase-like [Prunus mume]	Metabolism;Metabolism;Metabolism;Metabolism;Metabolism	Global and overview maps;Global and overview maps;Biosynthesis of other secondary metabolites;Biosynthesis of other secondary metabolites;Biosynthesis of other secondary metabolites	ko01100//Metabolic pathways;ko01110//Biosynthesis of secondary metabolites;ko00940//Phenylpropanoid biosynthesis;ko00941//Flavonoid biosynthesis;ko00945//Stilbenoid, diarylheptanoid and gingerol biosynthesis	K13065;K13065;K13065;K13065;K13065	-	GO:0016746//transferase activity, transferring acyl groups	-
Unigene0003667	121	81	76	0	0	0	2.58	1.56	1.9	0	0	0	2.01333	0.001	-10.9754	4.51558e-13	1.14433e-11	MAPKKK5	PREDICTED: mitogen-activated protein kinase kinase kinase YODA-like [Prunus mume]	-	-	-	-	-	-	-
Unigene0025752	88	109	68	0	0	0	4.59	5.14	4.17	0	0	0	4.63333	0.001	-12.1778	4.56609e-13	1.15619e-11	--	PREDICTED: disease resistance protein RGA2-like [Prunus mume]	-	-	-	-	-	-	-
Unigene0013664	705	610	595	252	259	319	9.38	7.33	9.3	2.85	3.22	3.51	8.67	3.19333	-1.44097	4.8002e-13	1.21448e-11	AG118	PREDICTED: acetylornithine aminotransferase, mitochondrial [Prunus mume]	Metabolism;Metabolism;Metabolism;Metabolism;Metabolism	Global and overview maps;Global and overview maps;Global and overview maps;Global and overview maps;Amino acid metabolism	ko01100//Metabolic pathways;ko01110//Biosynthesis of secondary metabolites;ko01230//Biosynthesis of amino acids;ko01210//2-Oxocarboxylic acid metabolism;ko00220//Arginine biosynthesis	K00818;K00818;K00818;K00818;K00818	GO:0009532//plastid stroma	GO:0008483//transaminase activity;GO:0043168//anion binding;GO:0046914//transition metal ion binding	GO:0003006//developmental process involved in reproduction;GO:0006525//arginine metabolic process;GO:0006950//response to stress;GO:0009617//response to bacterium;GO:0048364//root development
Unigene0002739	256	350	241	103	103	109	4.92	6.08	5.45	1.68	1.85	1.74	5.48333	1.75667	-1.64221	4.98615e-13	1.26051e-11	At5g05600	PREDICTED: flavonol synthase/flavanone 3-hydroxylase [Prunus mume]	-	-	-	-	-	GO:0016705//oxidoreductase activity, acting on paired donors, with incorporation or reduction of molecular oxygen;GO:0043169//cation binding	GO:0044710//single-organism metabolic process
Unigene0023110	1129	1347	1141	3384	4501	3568	12.02	12.96	14.28	30.63	44.8	31.46	13.0867	35.63	1.44499	5.18659e-13	1.31012e-11	--	PREDICTED: tetraspanin-19-like isoform X2 [Prunus mume]	-	-	-	-	-	-	-
Unigene0035196	809	739	608	302	327	289	20.68	17.07	18.27	6.56	7.81	6.12	18.6733	6.83	-1.45102	5.28999e-13	1.33516e-11	LIGB	PREDICTED: extradiol ring-cleavage dioxygenase [Prunus mume]	Metabolism	Biosynthesis of other secondary metabolites	ko00965//Betalain biosynthesis	K15777	-	GO:0005506//iron ion binding;GO:0016491//oxidoreductase activity	GO:0044710//single-organism metabolic process
Unigene0030322	164	190	139	4	3	23	8.06	8.44	8.03	0.17	0.14	0.94	8.17667	0.416667	-4.29455	5.32697e-13	1.3434e-11	At1g53420	PREDICTED: probable leucine-rich repeat receptor-like serine/threonine-protein kinase At3g14840 [Prunus mume]	-	-	-	-	-	GO:0004672//protein kinase activity	GO:0008152//metabolic process
Unigene0027216	619	718	563	286	309	344	7.04	7.38	7.52	2.76	3.28	3.24	7.31333	3.09333	-1.24137	5.33331e-13	1.34392e-11	At5g40240	PREDICTED: WAT1-related protein At5g40240-like [Prunus mume]	-	-	-	-	-	-	-
Unigene0027871	43	47	45	201	178	224	0.28	0.28	0.34	1.11	1.08	1.2	0.3	1.13	1.91329	5.34055e-13	1.34466e-11	MLO15	PREDICTED: MLO-like protein 1 [Prunus mume]	-	-	-	-	-	-	GO:0010053//root epidermal cell differentiation
Unigene0024323	110	91	78	1	0	2	1.18	0.88	0.98	0.01	0	0.02	1.01333	0.01	-6.66297	5.39925e-13	1.35834e-11	AtMg00310	reverse transcriptase [Corchorus capsularis]	-	-	-	-	-	-	-
Unigene0000256	24	40	19	456	121	516	0.2	0.3	0.19	3.23	0.94	3.56	0.23	2.57667	3.4858	5.40803e-13	1.35945e-11	--	PREDICTED: uncharacterized protein LOC103322228 [Prunus mume]	-	-	-	-	-	-	-
Unigene0019267	165	300	178	37	11	40	7.81	12.83	9.9	1.49	0.49	1.57	10.18	1.18333	-3.10481	5.50844e-13	1.38358e-11	N	PREDICTED: TMV resistance protein N-like [Prunus mume]	-	-	-	-	-	-	-
Unigene0030263	87	95	73	0	0	0	4.31	4.26	4.25	0	0	0	4.27333	0.001	-12.0611	5.64297e-13	1.41623e-11	DSC1	PREDICTED: TMV resistance protein N-like [Prunus mume]	-	-	-	-	-	-	-
Unigene0025725	4037	4399	3659	2116	2264	2082	40.72	40.11	43.38	18.15	21.35	17.4	41.4033	18.9667	-1.12628	5.65724e-13	1.41867e-11	ILR1	PREDICTED: IAA-amino acid hydrolase ILR1-like [Prunus mume]	-	-	-	-	-	GO:0003824//catalytic activity	-
Unigene0025554	1	0	0	223	263	142	0.04	0	0	8.06	10.45	5	0.0133333	7.83667	9.19906	5.66926e-13	1.42055e-11	--	hypothetical protein PRUPE_8G056200 [Prunus persica]	-	-	-	-	-	-	-
Unigene0017098	180	149	94	0	0	2	6.3	4.72	3.87	0	0	0.06	4.96333	0.02	-7.95517	5.72177e-13	1.43255e-11	--	hypothetical protein PRUPE_1G517900 [Prunus persica]	-	-	-	-	-	-	-
Unigene0012025	119	78	109	13	5	5	3.36	1.99	3.62	0.31	0.13	0.12	2.99	0.186667	-4.00161	5.81855e-13	1.45562e-11	LRR-RLK	PREDICTED: probable leucine-rich repeat receptor-like serine/threonine-protein kinase At3g14840 isoform X2 [Prunus mume]	-	-	-	-	-	GO:0016772//transferase activity, transferring phosphorus-containing groups	-
Unigene0011765	100	190	126	28	14	21	6.41	11.01	9.49	1.53	0.84	1.12	8.97	1.16333	-2.94684	5.99744e-13	1.49917e-11	--	PREDICTED: heat shock 70 kDa protein 18-like [Prunus mume]	Genetic Information Processing;Genetic Information Processing;Cellular Processes	Folding, sorting and degradation;Transcription;Transport and catabolism	ko04141//Protein processing in endoplasmic reticulum;ko03040//Spliceosome;ko04144//Endocytosis	K03283;K03283;K03283	-	-	-
Unigene0005174	2526	2736	1893	1270	857	1447	15.91	15.58	14.01	6.8	5.05	7.55	15.1667	6.46667	-1.22981	6.0809e-13	1.51881e-11	RGI3	PREDICTED: probable LRR receptor-like serine/threonine-protein kinase At4g26540 [Prunus mume]	-	-	-	-	GO:0031224//intrinsic component of membrane	GO:0004672//protein kinase activity;GO:0016628//oxidoreductase activity, acting on the CH-CH group of donors, NAD or NADP as acceptor;GO:0032550//purine ribonucleoside binding	GO:0006464//cellular protein modification process;GO:0006796//phosphate-containing compound metabolic process;GO:0044710//single-organism metabolic process
Unigene0021362	20575	22634	16486	11670	11674	11010	542.16	539.03	510.59	261.48	287.6	240.31	530.593	263.13	-1.01183	6.12017e-13	1.5274e-11	--	hypothetical protein PRUPE_ppa013018mg [Prunus persica]	-	-	-	-	-	-	-
Unigene0034236	75	110	74	0	0	0	4.49	5.96	5.21	0	0	0	5.22	0.001	-12.3498	6.31783e-13	1.57547e-11	--	hypothetical protein PRUPE_1G195200 [Prunus persica]	-	-	-	-	-	-	-
Unigene0024670	172	53	79	3	2	3	3.52	0.98	1.9	0.05	0.04	0.05	2.13333	0.0466667	-5.51457	6.45125e-13	1.6049e-11	HGN1	PREDICTED: glucan endo-1,3-beta-glucosidase, basic vacuolar isoform [Prunus mume]	-	-	-	-	-	-	-
Unigene0015834	302	387	277	106	121	140	5.88	6.81	6.34	1.75	2.2	2.26	6.34333	2.07	-1.61561	6.50176e-13	1.61617e-11	--	-	-	-	-	-	-	-	-
Unigene0012323	120	144	113	0	1	1	3.64	3.95	4.03	0	0.03	0.03	3.87333	0.02	-7.59743	6.79922e-13	1.68877e-11	--	-	-	-	-	-	-	-	-
Unigene0002327	420	489	421	1072	1038	1110	8.44	8.89	9.95	18.33	19.51	18.49	9.09333	18.7767	1.04606	6.97969e-13	1.73222e-11	BPA1	PREDICTED: binding partner of ACD11 1 [Prunus mume]	-	-	-	-	-	GO:0097159//organic cyclic compound binding	-
Unigene0001735	71	94	69	2	6	1	1.56	1.87	1.79	0.04	0.12	0.02	1.74	0.06	-4.85798	7.00758e-13	1.73776e-11	--	hypothetical protein PRUPE_2G080300 [Prunus persica]	-	-	-	-	-	-	-
Unigene0015974	225	216	194	61	66	78	8.22	7.13	8.33	1.89	2.25	2.36	7.89333	2.16667	-1.86516	7.08807e-13	1.75632e-11	--	PREDICTED: uncharacterized protein LOC103327421 isoform X1 [Prunus mume]	-	-	-	-	-	-	-
Unigene0026720	5072	5065	3616	2331	2492	2370	61.15	55.19	51.24	23.9	28.09	23.67	55.86	25.22	-1.14725	7.15323e-13	1.77106e-11	MPK3	PREDICTED: mitogen-activated protein kinase 3 [Prunus mume]	Organismal Systems;Environmental Information Processing	Environmental adaptation;Signal transduction	ko04626//Plant-pathogen interaction;ko04016//MAPK signaling pathway - plant	K20536;K20536	GO:0043231//intracellular membrane-bounded organelle	GO:0004702//receptor signaling protein serine/threonine kinase activity;GO:0032550//purine ribonucleoside binding	GO:0000187//activation of MAPK activity;GO:0006091//generation of precursor metabolites and energy;GO:0006605//protein targeting;GO:0009411//response to UV;GO:0009617//response to bacterium;GO:0009620//response to fungus;GO:0009696//salicylic acid metabolic process;GO:0009700//indole phytoalexin biosynthetic process;GO:0009755//hormone-mediated signaling pathway;GO:0009863//salicylic acid mediate…
Unigene0001543	269	314	194	100	67	70	3.02	3.18	2.56	0.95	0.7	0.65	2.92	0.766667	-1.9293	7.2048e-13	1.78242e-11	COP1	PREDICTED: E3 ubiquitin-protein ligase COP1-like isoform X1 [Prunus mume]	Genetic Information Processing;Organismal Systems	Folding, sorting and degradation;Environmental adaptation	ko04120//Ubiquitin mediated proteolysis;ko04712//Circadian rhythm - plant	K10143;K10143	-	GO:0003824//catalytic activity;GO:0046914//transition metal ion binding	-
Unigene0005402	117	219	132	4	16	20	3.6	6.08	4.77	0.1	0.46	0.51	4.81667	0.356667	-3.75539	7.24843e-13	1.79179e-11	--	hypothetical protein PRUPE_2G076900 [Prunus persica]	-	-	-	-	-	-	-
Unigene0000126	118	229	133	26	7	8	0.83	1.45	1.1	0.16	0.05	0.05	1.12667	0.0866667	-3.70044	7.30479e-13	1.80318e-11	CYP72A154	PREDICTED: cytochrome P450 CYP749A22-like [Malus domestica]	Metabolism	Metabolism of terpenoids and polyketides	ko00905//Brassinosteroid biosynthesis	K15639	-	-	-
Unigene0034949	155	283	143	2	0	16	7.9	13.03	8.56	0.09	0	0.68	9.83	0.256667	-5.25922	7.30607e-13	1.80318e-11	--	PREDICTED: wound-induced protein 1-like [Prunus mume]	-	-	-	-	-	-	-
Unigene0004795	0	0	0	114	78	136	0	0	0	1.53	1.15	1.78	0.001	1.48667	10.5379	7.33904e-13	1.80989e-11	--	PREDICTED: leucine-rich repeat receptor-like protein kinase PXL2 [Prunus mume]	-	-	-	-	-	-	-
Unigene0006194	0	0	0	84	143	119	0	0	0	1.13	2.11	1.55	0.001	1.59667	10.6408	7.46273e-13	1.83894e-11	SRF2	PREDICTED: protein STRUBBELIG-RECEPTOR FAMILY 2-like [Prunus mume]	-	-	-	-	-	-	-
Unigene0022549	211	307	161	823	580	1022	2.69	3.54	2.41	8.93	6.92	10.8	2.88	8.88333	1.62503	8.05797e-13	1.98405e-11	MEKK1	PREDICTED: mitogen-activated protein kinase kinase kinase 1-like isoform X1 [Prunus mume]	Organismal Systems;Environmental Information Processing	Environmental adaptation;Signal transduction	ko04626//Plant-pathogen interaction;ko04016//MAPK signaling pathway - plant	K13414;K13414	-	GO:0004674//protein serine/threonine kinase activity;GO:0036094//small molecule binding;GO:0097159//organic cyclic compound binding;GO:1901363//heterocyclic compound binding	GO:0006468//protein phosphorylation
Unigene0007917	304	353	312	1263	1339	930	3.85	4.04	4.65	13.62	15.87	9.77	4.18	13.0867	1.64652	8.1838e-13	2.01345e-11	THA8L	PREDICTED: pentatricopeptide repeat-containing protein At1g62350-like [Prunus mume]	-	-	-	-	-	-	-
Unigene0015087	214	98	74	3	9	9	14.42	5.97	5.86	0.17	0.57	0.5	8.75	0.413333	-4.40391	8.47675e-13	2.08228e-11	--	PREDICTED: cysteine-rich and transmembrane domain-containing protein A-like [Prunus mume]	-	-	-	-	-	-	-
Unigene0035559	814	1045	813	497	347	376	6.08	7.05	7.13	3.15	2.42	2.32	6.75333	2.63	-1.36054	8.47693e-13	2.08228e-11	UGT87A2	PREDICTED: UDP-glycosyltransferase 87A1-like [Malus domestica]	-	-	-	-	-	GO:0035251//UDP-glucosyltransferase activity	-
Unigene0015901	185	196	150	476	581	631	5.65	5.41	5.38	12.36	16.59	15.96	5.48	14.97	1.44983	8.7766e-13	2.15251e-11	EF_0799	PREDICTED: probable endopeptidase p60 isoform X2 [Prunus mume]	-	-	-	-	-	-	-
Unigene0024161	79	115	63	0	0	0	4.71	6.2	4.41	0	0	0	5.10667	0.001	-12.3182	8.90868e-13	2.18147e-11	--	PREDICTED: F-box protein FBW2-like [Prunus mume]	-	-	-	-	-	-	-
Unigene0027577	103	90	62	0	0	0	2.84	2.25	2.01	0	0	0	2.36667	0.001	-11.2086	8.91894e-13	2.18228e-11	--	hypothetical protein PRUPE_8G046700 [Prunus persica]	-	-	-	-	-	-	-
Unigene0002006	1253	1513	1026	488	224	524	8.35	9.12	8.04	2.77	1.4	2.89	8.50333	2.35333	-1.85332	9.16016e-13	2.23954e-11	At3g03770	PREDICTED: probable inactive leucine-rich repeat receptor-like protein kinase At3g03770 [Prunus mume]	-	-	-	-	GO:0031224//intrinsic component of membrane	GO:0016772//transferase activity, transferring phosphorus-containing groups;GO:0032550//purine ribonucleoside binding	GO:0006464//cellular protein modification process;GO:0006796//phosphate-containing compound metabolic process;GO:0009411//response to UV;GO:0009813//flavonoid biosynthetic process;GO:0034285//response to disaccharide
Unigene0032608	73	85	99	0	0	0	3.97	4.18	6.34	0	0	0	4.83	0.001	-12.2378	9.23041e-13	2.25495e-11	--	PREDICTED: U4/U6.U5 tri-snRNP-associated protein 2-like [Malus domestica]	-	-	-	-	-	-	-
Unigene0001670	968	1588	958	473	467	580	19.61	29.08	22.81	8.15	8.85	9.73	23.8333	8.91	-1.41948	9.26912e-13	2.26264e-11	PAP6	PREDICTED: probable plastid-lipid-associated protein 6, chloroplastic [Prunus mume]	-	-	-	-	GO:0009526//plastid envelope;GO:0016020//membrane;GO:0031976//plastid thylakoid;GO:0044434//chloroplast part;GO:0044436//thylakoid part	-	GO:0000302//response to reactive oxygen species;GO:0009617//response to bacterium;GO:0009657//plastid organization
Unigene0034170	162	316	170	54	29	49	1.5	2.64	1.85	0.42	0.25	0.37	1.99667	0.346667	-2.52597	9.35694e-13	2.28229e-11	--	Receptor-like protein 12 [Morus notabilis]	-	-	-	-	-	-	-
Unigene0023569	198	317	230	74	72	85	1.9	2.75	2.6	0.6	0.65	0.68	2.41667	0.643333	-1.90938	9.69423e-13	2.36087e-11	Xyl2	PREDICTED: beta-xylosidase/alpha-L-arabinofuranosidase 2 [Prunus mume]	Metabolism;Metabolism	Global and overview maps;Carbohydrate metabolism	ko01100//Metabolic pathways;ko00520//Amino sugar and nucleotide sugar metabolism	K15920;K15920	-	GO:0015926//glucosidase activity	GO:0044238//primary metabolic process
Unigene0023151	67	115	74	0	0	0	1.48	2.29	1.92	0	0	0	1.89667	0.001	-10.8893	1.01375e-12	2.46691e-11	YSL6	PREDICTED: probable metal-nicotianamine transporter YSL6 [Prunus mume]	-	-	-	-	-	-	-
Unigene0036847	710	653	502	230	274	274	7.19	5.98	5.97	1.98	2.59	2.3	6.38	2.29	-1.47821	1.02159e-12	2.48404e-11	MTP4	PREDICTED: metal tolerance protein 4-like [Prunus mume]	-	-	-	-	GO:0031224//intrinsic component of membrane	GO:0015075//ion transmembrane transporter activity	GO:0006812//cation transport;GO:0044763//single-organism cellular process
Unigene0032126	0	2	0	134	236	170	0	0.06	0	3.81	7.38	4.71	0.02	5.3	8.04985	1.03126e-12	2.50559e-11	--	PREDICTED: WAT1-related protein At4g15540-like [Prunus mume]	-	-	-	-	-	-	-
Unigene0017912	496	406	431	128	69	166	7.04	5.21	7.19	1.54	0.92	1.95	6.48	1.47	-2.14018	1.0397e-12	2.52415e-11	PLP2	PREDICTED: patatin-like protein 2 [Ziziphus jujuba]	-	-	-	-	-	-	-
Unigene0033622	6662	7673	5668	16474	20985	17427	153.79	160.09	153.79	323.38	452.93	333.23	155.89	369.847	1.2464	1.05376e-12	2.5563e-11	At3g51890	PREDICTED: clathrin light chain 3-like [Prunus mume]	-	-	-	-	-	-	-
Unigene0002342	555	616	500	1314	1504	1469	19.75	19.82	20.92	39.77	50.05	43.31	20.1633	44.3767	1.13807	1.05799e-12	2.56455e-11	ACP1	PREDICTED: acyl carrier protein 1, chloroplastic [Prunus mume]	-	-	-	-	-	-	-
Unigene0000187	874	662	627	259	289	256	31.92	21.85	26.91	8.04	9.87	7.74	26.8933	8.55	-1.65325	1.09909e-12	2.66211e-11	--	-	-	-	-	-	-	-	-
Unigene0009944	81	172	53	0	0	0	2.51	4.82	1.93	0	0	0	3.08667	0.001	-11.5918	1.13149e-12	2.73634e-11	--	-	-	-	-	-	-	-	-
Unigene0029998	23	30	27	138	171	187	0.45	0.53	0.62	2.3	3.13	3.03	0.533333	2.82	2.40259	1.13783e-12	2.74956e-11	--	PREDICTED: mitochondrial ubiquitin ligase activator of NFKB 1 [Vigna radiata var. radiata] [Vigna radiata]	-	-	-	-	-	-	-
Unigene0012909	0	0	2	214	136	141	0	0	0.03	2.47	1.73	1.59	0.01	1.93	7.59246	1.1643e-12	2.81135e-11	JGB	PREDICTED: myosin heavy chain kinase B-like [Fragaria vesca subsp. vesca] [Fragaria vesca]	-	-	-	-	-	-	-
Unigene0019438	0	0	0	161	63	130	0	0	0	2.75	1.18	2.16	0.001	2.03	10.9873	1.18852e-12	2.86761e-11	RE1	Integrase, catalytic core [Corchorus capsularis]	-	-	-	-	-	-	-
Unigene0025823	73	101	49	1	2	2	1.22	1.52	0.96	0.01	0.03	0.03	1.23333	0.0233333	-5.72403	1.20841e-12	2.91333e-11	--	hypothetical protein PRUPE_2G046500 [Prunus persica]	-	-	-	-	-	-	-
Unigene0020161	1663	1866	1421	605	209	526	176.26	178.74	177.02	54.52	20.71	46.18	177.34	40.47	-2.13159	1.21166e-12	2.91892e-11	--	-	-	-	-	-	-	-	-
Unigene0009960	80	132	82	691	497	361	1.85	2.75	2.22	13.56	10.73	6.9	2.27333	10.3967	2.19324	1.21485e-12	2.92342e-11	SABP2	PREDICTED: salicylic acid-binding protein 2-like [Prunus mume]	-	-	-	-	-	-	-
Unigene0005838	98	28	35	452	463	698	1.97	0.51	0.83	7.72	8.7	11.62	1.10333	9.34667	3.08258	1.2154e-12	2.92342e-11	GALT3	PREDICTED: hydroxyproline O-galactosyltransferase GALT3-like [Prunus mume]	-	-	-	-	GO:0031224//intrinsic component of membrane	GO:0016758//transferase activity, transferring hexosyl groups	GO:0006464//cellular protein modification process
Unigene0000731	430	383	294	938	895	1220	4.29	3.45	3.44	7.95	8.34	10.07	3.72667	8.78667	1.23743	1.252e-12	3.00914e-11	KLCR1	PREDICTED: kinesin light chain 4-like [Prunus mume]	-	-	-	-	-	-	-
Unigene0032412	0	4	0	87	160	117	0	0.16	0	3.21	6.49	4.2	0.0533333	4.63333	6.44087	1.26508e-12	3.03824e-11	--	-	-	-	-	-	-	-	-
Unigene0027709	1457	1616	1157	628	693	861	44.32	44.43	41.36	16.24	19.71	21.69	43.37	19.2133	-1.17459	1.29793e-12	3.11473e-11	--	hypothetical protein PRUPE_6G282100 [Prunus persica]	-	-	-	-	-	-	-
Unigene0032687	875	1156	763	284	396	405	17.79	21.24	18.23	4.91	7.53	6.82	19.0867	6.42	-1.57192	1.36303e-12	3.26596e-11	--	PREDICTED: uncharacterized protein LOC103339566 [Prunus mume]	-	-	-	-	-	-	-
Unigene0032058	1587	1743	1273	931	575	836	8.97	8.9	8.45	4.47	3.04	3.91	8.77333	3.80667	-1.2046	1.36304e-12	3.26596e-11	Ncapd3	PREDICTED: condensin-2 complex subunit D3 [Prunus mume]	-	-	-	-	GO:0000796//condensin complex	-	-
Unigene0024912	108	137	118	0	2	0	1.08	1.23	1.38	0	0.02	0	1.23	0.00666667	-7.52748	1.36981e-12	3.27967e-11	RE2	OSIGBa0134J07.9 [Oryza sativa Indica Group]	-	-	-	-	-	-	-
Unigene0000107	362	329	326	115	130	124	6.32	5.19	6.69	1.71	2.12	1.79	6.06667	1.87333	-1.6953	1.38114e-12	3.30426e-11	--	T4.14 [Malus x robusta]	-	-	-	-	-	-	-
Unigene0035974	112	104	102	13	13	4	1.73	1.45	1.85	0.17	0.19	0.05	1.67667	0.136667	-3.61686	1.38771e-12	3.31743e-11	CYP81E8	PREDICTED: cytochrome P450 81E8-like isoform X1 [Prunus mume]	Metabolism;Metabolism	Global and overview maps;Biosynthesis of other secondary metabolites	ko01110//Biosynthesis of secondary metabolites;ko00943//Isoflavonoid biosynthesis	K13260;K13260	-	-	-
Unigene0023782	52	130	74	6	4	3	0.71	1.6	1.19	0.07	0.05	0.03	1.16667	0.05	-4.54432	1.42225e-12	3.3974e-11	--	hypothetical protein GlmaxMp26 (mitochondrion) [Glycine max]	-	-	-	-	-	-	-
Unigene0017576	0	0	0	177	56	143	0	0	0	1.17	0.41	0.92	0.001	0.833333	9.70275	1.45172e-12	3.46516e-11	RGA2	PREDICTED: disease resistance protein RGA2-like [Prunus mume]	-	-	-	-	-	-	-
Unigene0020445	1783	1320	784	340	260	496	36.09	24.15	18.65	5.85	4.92	8.32	26.2967	6.36333	-2.04703	1.45568e-12	3.47195e-11	ZIP8	PREDICTED: zinc transporter 8-like [Prunus mume]	-	-	-	-	GO:0031224//intrinsic component of membrane	GO:0016628//oxidoreductase activity, acting on the CH-CH group of donors, NAD or NADP as acceptor;GO:0022890//inorganic cation transmembrane transporter activity	GO:0006829//zinc II ion transport;GO:0044710//single-organism metabolic process;GO:0044763//single-organism cellular process
Unigene0024087	34	8	39	425	423	315	0.9	0.19	1.22	9.62	10.53	6.94	0.77	9.03	3.5518	1.46131e-12	3.48272e-11	--	PREDICTED: uncharacterized protein LOC103322259 [Prunus mume]	-	-	-	-	-	-	-
Unigene0018171	14	42	21	202	198	192	0.2	0.55	0.36	2.48	2.67	2.3	0.37	2.48333	2.74668	1.48362e-12	3.5332e-11	gba_locus_19756	PREDICTED: CASP-like protein 5B2 [Prunus mume]	-	-	-	-	GO:0031224//intrinsic component of membrane	-	-
Unigene0030565	945	754	711	323	266	422	29.85	21.52	26.4	8.68	7.86	11.04	25.9233	9.19333	-1.49559	1.49963e-12	3.5686e-11	At3g25290	PREDICTED: auxin-induced in root cultures protein 12 [Prunus mume]	-	-	-	-	-	-	-
Unigene0028779	2822	2638	2413	1689	1279	1582	50.07	42.3	50.32	25.48	21.22	23.25	47.5633	23.3167	-1.02849	1.5193e-12	3.61265e-11	CSE	PREDICTED: caffeoylshikimate esterase-like [Pyrus x bretschneideri]	-	-	-	-	-	-	-
Unigene0032946	82	79	73	0	0	0	5.59	4.86	5.85	0	0	0	5.43333	0.001	-12.4076	1.54935e-12	3.68129e-11	PHYA1	PREDICTED: phytochrome A [Prunus mume]	Organismal Systems	Environmental adaptation	ko04712//Circadian rhythm - plant	K12120	GO:0016604//nuclear body	GO:0009883//red or far-red light photoreceptor activity;GO:0032550//purine ribonucleoside binding;GO:0046983//protein dimerization activity	GO:0006417//regulation of translation;GO:0006464//cellular protein modification process;GO:0007602//phototransduction;GO:0009606//tropism;GO:0010017//red or far-red light signaling pathway;GO:0010114//response to red light;GO:0010218//response to far red light;GO:0035556//intracellular signal transduction;GO:0042221//response to chemical;GO:0048511//rhythmic process
Unigene0036412	3444	3604	2867	9413	5901	8675	15.93	15.07	15.59	37.03	25.52	33.24	15.53	31.93	1.03985	1.56904e-12	3.72524e-11	AVT1C	PREDICTED: vacuolar amino acid transporter 1 [Prunus mume]	-	-	-	-	GO:0031224//intrinsic component of membrane	-	-
Unigene0023839	0	0	0	77	131	114	0	0	0	3.37	6.29	4.85	0.001	4.83667	12.2398	1.59134e-12	3.77393e-11	--	hypothetical protein PRUPE_ppa014066mg [Prunus persica]	-	-	-	-	-	-	-
Unigene0019980	0	0	0	96	71	183	0	0	0	0.95	0.77	1.76	0.001	1.16	10.1799	1.59196e-12	3.77393e-11	--	hypothetical protein PRUPE_5G196700 [Prunus persica]	-	-	-	-	-	-	-
Unigene0011037	108	183	98	19	22	27	8.36	12.81	8.92	1.25	1.59	1.73	10.03	1.52333	-2.71902	1.60671e-12	3.80601e-11	--	PREDICTED: pheophytinase, chloroplastic [Prunus mume]	-	-	-	-	-	-	-
Unigene0016465	3378	3207	2558	1356	1437	1078	36.06	30.94	32.09	12.31	14.34	9.53	33.03	12.06	-1.45355	1.62176e-12	3.83875e-11	At2g36630	Transmembrane protein TauE like protein [Corchorus olitorius]	-	-	-	-	-	-	-
Unigene0026164	0	2	1	102	94	121	0	0.04	0.03	1.97	2	2.28	0.0233333	2.08333	6.48036	1.62785e-12	3.85024e-11	--	hypothetical protein PRUPE_2G018800 [Prunus persica]	-	-	-	-	-	-	-
Unigene0000271	120	183	108	23	11	31	3.42	4.72	3.62	0.56	0.29	0.73	3.92	0.526667	-2.89589	1.63813e-12	3.87162e-11	N	PREDICTED: TMV resistance protein N-like [Prunus mume]	-	-	-	-	-	-	-
Unigene0001217	0	0	0	89	101	105	0	0	0	1.92	2.39	2.2	0.001	2.17	11.0835	1.63942e-12	3.87174e-11	--	PREDICTED: glutathione S-transferase T3-like [Malus domestica]	-	-	-	-	-	-	-
Unigene0029811	233	146	113	27	6	13	2.76	1.56	1.57	0.27	0.07	0.13	1.96333	0.156667	-3.64753	1.66385e-12	3.92646e-11	At5g22730	PREDICTED: F-box protein At2g39490 [Prunus mume]	-	-	-	-	-	-	-
Unigene0033026	517	555	454	286	212	283	12.84	12.46	13.26	6.04	4.92	5.82	12.8533	5.59333	-1.20036	1.68177e-12	3.96575e-11	--	-	-	-	-	-	-	-	-
Unigene0020064	112	157	96	2	0	0	0.81	1.02	0.81	0.01	0	0	0.88	0.00333333	-8.04439	1.7117e-12	4.03329e-11	GLR2.8	PREDICTED: glutamate receptor 2.8-like [Prunus mume]	-	-	-	-	-	-	-
Unigene0007096	1011	1001	829	537	507	524	20.98	18.78	20.22	9.48	9.84	9.01	19.9933	9.44333	-1.08215	1.72593e-12	4.06373e-11	--	DUF1223 domain-containing protein [Cephalotus follicularis]	-	-	-	-	-	-	-
Unigene0025418	64	94	81	0	0	0	2.18	2.89	3.24	0	0	0	2.77	0.001	-11.4357	1.73751e-12	4.08794e-11	--	Cyclin-dependent kinase B1-1 [Zea mays]	-	-	-	-	-	GO:0004672//protein kinase activity	GO:0044763//single-organism cellular process
Unigene0016447	120	155	81	23	12	10	0.98	1.15	0.78	0.16	0.09	0.07	0.97	0.106667	-3.18488	1.82825e-12	4.29493e-11	--	Retrovirus-related Pol polyprotein from transposon TNT 1-94 [Cajanus cajan]	-	-	-	-	-	-	-
Unigene0027104	106	74	64	0	0	0	7.35	4.64	5.21	0	0	0	5.73333	0.001	-12.4852	1.83922e-12	4.31679e-11	--	PREDICTED: uncharacterized protein LOC103319292 [Prunus mume]	-	-	-	-	-	-	-
Unigene0029266	58	109	82	0	0	0	1.79	3.04	2.97	0	0	0	2.6	0.001	-11.3443	1.84672e-12	4.32611e-11	--	PREDICTED: uncharacterized protein LOC103335235 [Prunus mume]	-	-	-	-	-	-	-
Unigene0010222	1574	2103	1582	668	288	702	41.48	50.08	49	14.97	7.1	15.32	46.8533	12.4633	-1.91046	1.84706e-12	4.32611e-11	OsI_029135	Proteasome subunit alpha type-7, partial [Anthurium amnicola]	Genetic Information Processing	Folding, sorting and degradation	ko03050//Proteasome	K02731	-	-	-
Unigene0029493	701	693	762	177	225	314	19.74	17.63	25.22	4.24	5.92	7.32	20.8633	5.82667	-1.84023	1.88229e-12	4.40531e-11	GSTU17	PREDICTED: glutathione S-transferase U17-like [Prunus mume]	Metabolism	Metabolism of other amino acids	ko00480//Glutathione metabolism	K00799	-	GO:0003824//catalytic activity	-
Unigene0006965	0	0	0	87	114	98	0	0	0	2.4	3.45	2.63	0.001	2.82667	11.4649	1.9122e-12	4.47196e-11	--	-	-	-	-	-	-	-	-
Unigene0034302	76	104	58	0	0	0	1.9	2.35	1.71	0	0	0	1.98667	0.001	-10.9561	1.93972e-12	4.53294e-11	--	PREDICTED: probable disease resistance protein RF45 [Prunus mume]	-	-	-	-	-	-	-
Unigene0030929	295	453	359	126	104	160	2.97	4.12	4.25	1.08	0.98	1.34	3.78	1.13333	-1.73781	1.94553e-12	4.5431e-11	--	hypothetical protein PRUPE_6G157200 [Prunus persica]	-	-	-	-	-	-	-
Unigene0030122	20176	24018	16058	9509	11197	10760	333.66	358.98	312.12	133.72	173.12	147.39	334.92	151.41	-1.14536	1.95948e-12	4.57227e-11	FBA2	PREDICTED: fructose-bisphosphate aldolase 1, chloroplastic [Prunus mume]	Metabolism;Metabolism;Metabolism;Metabolism;Metabolism;Metabolism;Metabolism;Metabolism	Global and overview maps;Global and overview maps;Global and overview maps;Global and overview maps;Carbohydrate metabolism;Energy metabolism;Carbohydrate metabolism;Carbohydrate metabolism	ko01100//Metabolic pathways;ko01110//Biosynthesis of secondary metabolites;ko01200//Carbon metabolism;ko01230//Biosynthesis of amino acids;ko00010//Glycolysis / Gluconeogenesis;ko00710//Carbon fixation in photosynthetic organisms;ko00030//Pentose phosphate pathway;ko00051//Fructose and mannose metabolism	K01623;K01623;K01623;K01623;K01623;K01623;K01623;K01623	-	GO:0016832//aldehyde-lyase activity	GO:0006090//pyruvate metabolic process
Unigene0013999	375	362	294	967	1176	996	7.97	6.95	7.34	17.48	23.37	17.53	7.42	19.46	1.39102	1.97674e-12	4.6091e-11	At1g26690	PREDICTED: transmembrane emp24 domain-containing protein p24delta9 [Prunus mume]	-	-	-	-	GO:0000139//Golgi membrane;GO:0031224//intrinsic component of membrane	-	GO:0006810//transport;GO:0008104//protein localization
Unigene0029082	0	0	0	118	89	86	0	0	0	1.5	1.25	1.07	0.001	1.27333	10.3144	2.14515e-12	4.9943e-11	WAK5	PREDICTED: wall-associated receptor kinase 1-like [Prunus mume]	-	-	-	-	-	-	-
Unigene0021622	108	121	133	0	0	2	2.96	3	4.29	0	0	0.05	3.41667	0.0166667	-7.67948	2.18364e-12	5.08013e-11	BEAT	PREDICTED: vinorine synthase-like, partial [Prunus mume]	-	-	-	-	-	-	-
Unigene0004434	1291	1211	1274	530	584	635	23.48	19.91	27.24	8.2	9.93	9.57	23.5433	9.23333	-1.3504	2.18999e-12	5.09112e-11	PV42A	PREDICTED: SNF1-related protein kinase regulatory subunit gamma-like PV42a [Prunus mume]	-	-	-	-	-	-	GO:0006796//phosphate-containing compound metabolic process
Unigene0030865	89	64	86	375	493	381	1.27	0.83	1.44	4.55	6.58	4.5	1.18	5.21	2.1425	2.204e-12	5.11987e-11	--	PREDICTED: uncharacterized protein LOC103342134 [Prunus mume]	-	-	-	-	-	-	-
Unigene0005490	88	97	53	0	0	0	2.57	2.56	1.82	0	0	0	2.31667	0.001	-11.1778	2.21005e-12	5.13012e-11	--	-	-	-	-	-	-	-	-
Unigene0015142	73	76	81	0	0	0	7.13	6.71	9.3	0	0	0	7.71333	0.001	-12.9131	2.2314e-12	5.17581e-11	--	PREDICTED: trithorax group protein osa isoform X1 [Prunus mume]	-	-	-	-	-	-	-
Unigene0028519	90	204	111	4	16	10	1.89	3.86	2.73	0.07	0.31	0.17	2.82667	0.183333	-3.94656	2.24688e-12	5.20787e-11	--	-	-	-	-	-	-	-	-
Unigene0021403	21	25	16	126	243	177	0.86	0.93	0.77	4.4	9.33	6.02	0.853333	6.58333	2.94764	2.26398e-12	5.2436e-11	--	-	-	-	-	-	-	-	-
Unigene0024107	122	64	79	5	8	4	2.02	0.96	1.54	0.07	0.12	0.05	1.50667	0.08	-4.23522	2.43692e-12	5.63996e-11	CYP93A1	PREDICTED: 3,9-dihydroxypterocarpan 6A-monooxygenase [Prunus mume]	-	-	-	-	-	GO:0016709//oxidoreductase activity, acting on paired donors, with incorporation or reduction of molecular oxygen, NAD(P)H as one donor, and incorporation of one atom of oxygen;GO:0046906//tetrapyrrole binding;GO:0046914//transition metal ion binding	GO:0044710//single-organism metabolic process
Unigene0030320	105	126	89	447	273	508	6.11	6.62	6.08	22.11	14.85	24.47	6.27	20.4767	1.70744	2.45025e-12	5.66661e-11	--	PREDICTED: disease resistance protein TAO1-like [Prunus mume]	-	-	-	-	-	-	-
Unigene0022190	66	104	48	2	3	1	2.55	3.63	2.18	0.07	0.11	0.03	2.78667	0.07	-5.31504	2.45745e-12	5.67906e-11	--	PREDICTED: uncharacterized protein LOC103326057 [Prunus mume]	-	-	-	-	-	-	-
Unigene0027413	60	91	85	0	0	0	1.49	2.05	2.48	0	0	0	2.00667	0.001	-10.9706	2.46575e-12	5.69403e-11	--	PREDICTED: uncharacterized protein LOC107881207 [Prunus mume]	-	-	-	-	-	-	-
Unigene0001042	77	126	51	0	0	0	3.58	5.29	2.79	0	0	0	3.88667	0.001	-11.9243	2.47156e-12	5.70321e-11	--	-	-	-	-	-	-	-	-
Unigene0026584	65	93	70	0	0	0	4.28	5.54	5.42	0	0	0	5.08	0.001	-12.3106	2.49486e-12	5.75273e-11	--	-	-	-	-	-	-	-	-
Unigene0026162	0	0	0	84	107	98	0	0	0	5.42	7.6	6.16	0.001	6.39333	12.6424	2.52545e-12	5.81897e-11	--	hypothetical protein PRUPE_4G226600 [Prunus persica]	-	-	-	-	-	-	-
Unigene0016821	15	8	12	135	174	107	0.44	0.21	0.41	3.35	4.74	2.58	0.353333	3.55667	3.33142	2.57174e-12	5.92126e-11	--	PREDICTED: keratin-3, type I cytoskeletal 51 kDa-like [Prunus mume]	-	-	-	-	-	-	-
Unigene0011218	495	421	340	183	115	180	5.28	4.06	4.26	1.66	1.15	1.59	4.53333	1.46667	-1.62803	2.59505e-12	5.97053e-11	--	hypothetical protein PRUPE_5G210100 [Prunus persica]	-	-	-	-	-	-	-
Unigene0032873	631	777	627	267	321	287	4.88	5.43	5.7	1.76	2.32	1.84	5.33667	1.97333	-1.4353	2.61114e-12	6.00311e-11	--	PREDICTED: zeaxanthin epoxidase, chloroplastic [Populus euphratica]	-	-	-	-	-	-	-
Unigene0024807	55	75	64	2	2	2	1.8	2.22	2.46	0.06	0.06	0.05	2.16	0.0566667	-5.25239	2.61973e-12	6.01844e-11	DIR11	PREDICTED: dirigent protein 22-like [Prunus mume]	-	-	-	-	-	-	-
Unigene0025366	298	253	214	2	22	2	6.44	4.94	5.44	0.04	0.44	0.04	5.60667	0.173333	-5.01552	2.62816e-12	6.03337e-11	SAG39	PREDICTED: zingipain-2-like [Prunus mume]	Cellular Processes	Transport and catabolism	ko04145//Phagosome	K01365	-	-	-
Unigene0032001	6669	5530	5779	3190	2942	3355	86.43	64.78	88.03	35.16	35.65	36.02	79.7467	35.61	-1.16314	2.65536e-12	6.09132e-11	PME18	PREDICTED: pectinesterase [Prunus mume]	Metabolism;Metabolism	Global and overview maps;Carbohydrate metabolism	ko01100//Metabolic pathways;ko00040//Pentose and glucuronate interconversions	K01051;K01051	GO:0030312//external encapsulating structure;GO:0031090//organelle membrane;GO:0044444//cytoplasmic part	GO:0030597//RNA glycosylase activity;GO:0052689//carboxylic ester hydrolase activity	GO:0000272//polysaccharide catabolic process;GO:0001906//cell killing;GO:0006417//regulation of translation;GO:0006950//response to stress;GO:0009620//response to fungus;GO:0009664//plant-type cell wall organization;GO:0009892//negative regulation of metabolic process;GO:0010383//cell wall polysaccharide metabolic process
Unigene0025400	0	0	0	69	90	190	0	0	0	1.29	1.85	3.46	0.001	2.2	11.1033	2.73572e-12	6.27106e-11	--	PREDICTED: uncharacterized protein LOC101291512 [Fragaria vesca subsp. vesca] [Fragaria vesca]	-	-	-	-	-	-	-
Unigene0012321	344	358	260	92	43	114	9.09	8.55	8.08	2.07	1.06	2.5	8.57333	1.87667	-2.19168	2.81507e-12	6.44822e-11	At2g40280	PREDICTED: probable methyltransferase PMT23 isoform X2 [Prunus mume]	-	-	-	-	-	-	-
Unigene0029414	1361	1432	922	661	593	572	14.03	13.34	11.17	5.79	5.72	4.88	12.8467	5.46333	-1.23354	2.86831e-12	6.56536e-11	MIOX1	PREDICTED: inositol oxygenase 1 isoform X2 [Citrus sinensis]	Metabolism;Metabolism	Carbohydrate metabolism;Carbohydrate metabolism	ko00562//Inositol phosphate metabolism;ko00053//Ascorbate and aldarate metabolism	K00469;K00469	GO:0044424//intracellular part	GO:0016701//oxidoreductase activity, acting on single donors with incorporation of molecular oxygen	GO:0006020//inositol metabolic process
Unigene0013334	50	78	78	2	3	3	1.85	2.61	3.39	0.06	0.1	0.09	2.61667	0.0833333	-4.97269	2.87786e-12	6.58239e-11	--	-	-	-	-	-	-	-	-
Unigene0031660	1757	983	891	4569	4094	6389	41.2	20.83	24.56	91.1	89.75	124.09	28.8633	101.647	1.81625	2.92663e-12	6.68904e-11	EXPA4	PREDICTED: expansin-A4-like [Prunus mume]	-	-	-	-	GO:0030312//external encapsulating structure	-	GO:0071555//cell wall organization
Unigene0017953	1866	2326	1672	660	918	944	32.82	36.97	34.56	9.87	15.09	13.75	34.7833	12.9033	-1.43065	3.05084e-12	6.96782e-11	CSP41A	PREDICTED: chloroplast stem-loop binding protein of 41 kDa a, chloroplastic [Prunus mume]	-	-	-	-	GO:0005576//extracellular region;GO:0009526//plastid envelope;GO:0009532//plastid stroma;GO:0030529//intracellular ribonucleoprotein complex;GO:0031976//plastid thylakoid;GO:0044434//chloroplast part	GO:0008187//poly-pyrimidine tract binding;GO:0048037//cofactor binding	GO:0006091//generation of precursor metabolites and energy;GO:0006355//regulation of transcription, DNA-templated;GO:0006417//regulation of translation;GO:0006739//NADP metabolic process;GO:0006779//porphyrin-containing compound biosynthetic process;GO:0009639//response to red or far red light;GO:0009657//plastid organization;GO:0009887//organ morphogenesis;GO:0016072//rRNA metabolic process;GO:0…
Unigene0022016	73	72	79	0	0	0	7.19	6.41	9.15	0	0	0	7.58333	0.001	-12.8886	3.05502e-12	6.97228e-11	--	hypothetical protein PRUPE_2G040600 [Prunus persica]	-	-	-	-	-	-	-
Unigene0024660	137	38	56	714	525	1573	1.02	0.26	0.49	4.53	3.66	9.73	0.59	5.97333	3.33975	3.35271e-12	7.6461e-11	--	PREDICTED: uncharacterized protein LOC103325510 [Prunus mume]	-	-	-	-	-	-	-
Unigene0011377	7	2	3	91	145	83	0.39	0.1	0.2	4.28	7.5	3.8	0.23	5.19333	4.49696	3.35857e-12	7.65387e-11	--	PREDICTED: inactive disease resistance protein RPS4-like [Prunus mume]	-	-	-	-	-	-	-
Unigene0005425	73	84	57	2	0	2	6.62	6.88	6.07	0.15	0	0.15	6.52333	0.1	-6.02754	3.43592e-12	7.82443e-11	--	PREDICTED: multiple organellar RNA editing factor 8, chloroplastic/mitochondrial [Prunus mume]	-	-	-	-	-	-	-
Unigene0031512	13	12	10	98	111	105	0.39	0.33	0.36	2.52	3.14	2.63	0.36	2.76333	2.94034	3.46033e-12	7.87426e-11	--	PREDICTED: probable LRR receptor-like serine/threonine-protein kinase At1g07650 [Prunus mume]	-	-	-	-	-	-	-
Unigene0006028	125	92	96	4	11	15	6.98	4.64	6.3	0.19	0.57	0.69	5.97333	0.483333	-3.62745	3.47611e-12	7.89866e-11	--	ROTUNDIFOLIA like 21 [Theobroma cacao]	-	-	-	-	-	-	-
Unigene0012195	2296	2355	2151	1171	1096	907	22.59	20.94	24.87	9.8	10.08	7.39	22.8	9.09	-1.32668	3.48528e-12	7.91375e-11	DTX40	PREDICTED: protein DETOXIFICATION 40-like isoform X2 [Prunus mume]	-	-	-	-	-	-	-
Unigene0001671	12	9	3	134	198	92	0.08	0.05	0.02	0.74	1.2	0.49	0.05	0.81	4.01792	3.50659e-12	7.95635e-11	At3g47570	PREDICTED: probable LRR receptor-like serine/threonine-protein kinase At3g47570 [Pyrus x bretschneideri]	-	-	-	-	-	-	-
Unigene0035360	41	85	37	287	225	329	0.53	0.99	0.56	3.14	2.7	3.5	0.693333	3.11333	2.16684	3.59821e-12	8.15831e-11	CYP704C1	PREDICTED: cytochrome P450 704C1-like [Arachis ipaensis]	-	-	-	-	-	-	-
Unigene0026229	4	0	2	145	51	169	0.05	0	0.03	1.54	0.59	1.75	0.0266667	1.29333	5.59991	3.72054e-12	8.42954e-11	--	PREDICTED: LOW QUALITY PROTEIN: mediator of RNA polymerase II transcription subunit 15a-like [Prunus mume]	-	-	-	-	-	-	-
Unigene0035383	87	66	68	0	0	0	1.73	1.18	1.59	0	0	0	1.5	0.001	-10.5507	3.99133e-12	9.03649e-11	--	hypothetical protein PRUPE_3G260600 [Prunus persica]	-	-	-	-	-	-	-
Unigene0029416	2	3	1	70	116	81	0.15	0.21	0.09	4.58	8.34	5.16	0.15	6.02667	5.32833	4.12396e-12	9.33002e-11	Os06g0561000	inositol oxygenase 4-like [Dorcoceras hygrometricum]	Metabolism;Metabolism	Carbohydrate metabolism;Carbohydrate metabolism	ko00562//Inositol phosphate metabolism;ko00053//Ascorbate and aldarate metabolism	K00469;K00469	GO:0044424//intracellular part	GO:0016701//oxidoreductase activity, acting on single donors with incorporation of molecular oxygen	GO:0006020//inositol metabolic process
Unigene0007771	1110	1771	1321	525	410	734	14.47	20.87	20.24	5.82	5	7.93	18.5267	6.25	-1.56768	4.15821e-12	9.40069e-11	At2g32990	PREDICTED: endoglucanase 11 [Prunus mume]	-	-	-	-	-	GO:0004553//hydrolase activity, hydrolyzing O-glycosyl compounds	GO:0030243//cellulose metabolic process
Unigene0007476	0	2	0	259	184	96	0	0.01	0	1.43	1.12	0.52	0.00333333	1.02333	8.26209	4.1799e-12	9.44289e-11	GLCNAC1PUT1	transposase [Ipomoea nil]	-	-	-	-	-	-	-
Unigene0000310	90	104	45	7	5	7	1.41	1.47	0.83	0.09	0.07	0.09	1.23667	0.0833333	-3.89142	4.21414e-12	9.51336e-11	--	PREDICTED: receptor-like protein kinase HSL1 [Prunus mume]	-	-	-	-	-	-	GO:0006796//phosphate-containing compound metabolic process
Unigene0028918	193	240	204	590	876	1113	2.05	2.31	2.55	5.34	8.72	9.81	2.30333	7.95667	1.78844	4.34534e-12	9.80203e-11	LRK10	PREDICTED: rust resistance kinase Lr10-like [Prunus mume]	-	-	-	-	-	-	-
Unigene0034681	72	81	60	0	0	0	2.53	2.57	2.48	0	0	0	2.52667	0.001	-11.303	4.38089e-12	9.86839e-11	--	PREDICTED: uncharacterized protein LOC103323322 [Prunus mume]	-	-	-	-	-	-	-
Unigene0034863	109	109	113	2	0	0	1.26	1.13	1.53	0.02	0	0	1.30667	0.00666667	-7.61471	4.71893e-12	1.05993e-10	--	PREDICTED: uncharacterized protein LOC103436169 [Malus domestica]	-	-	-	-	-	-	-
Unigene0035479	453	587	480	73	119	185	19.97	23.39	24.87	2.74	4.9	6.75	22.7433	4.79667	-2.24534	4.7292e-12	1.06147e-10	PSBY	PREDICTED: photosystem II core complex proteins psbY, chloroplastic-like [Malus domestica]	Metabolism;Metabolism	Global and overview maps;Energy metabolism	ko01100//Metabolic pathways;ko00195//Photosynthesis	K02723;K02723	GO:0009534//chloroplast thylakoid;GO:0034357//photosynthetic membrane;GO:0044425//membrane part	-	GO:0006091//generation of precursor metabolites and energy;GO:0016043//cellular component organization;GO:0044238//primary metabolic process;GO:0071704//organic substance metabolic process
Unigene0031661	36	41	40	165	188	234	0.84	0.86	1.1	3.27	4.1	4.52	0.933333	3.96333	2.08625	4.76154e-12	1.06796e-10	EXPA8	expansin [Prunus armeniaca]	-	-	-	-	GO:0030312//external encapsulating structure	-	GO:0071555//cell wall organization
Unigene0003967	71	70	72	0	0	0	4.78	4.26	5.7	0	0	0	4.91333	0.001	-12.2625	4.83815e-12	1.08436e-10	--	PREDICTED: LOW QUALITY PROTEIN: putative disease resistance RPP13-like protein 1 [Prunus mume]	-	-	-	-	-	-	-
Unigene0015744	71	103	67	9	1	4	0.7	0.92	0.78	0.08	0.01	0.03	0.8	0.04	-4.32193	4.85795e-12	1.08802e-10	--	reverse transcriptase [Corchorus capsularis]	-	-	-	-	-	-	-
Unigene0034614	126	546	281	47	29	30	3.66	14.35	9.6	1.16	0.79	0.72	9.20333	0.89	-3.37028	5.01625e-12	1.12267e-10	--	PREDICTED: blue copper protein [Prunus mume]	-	-	-	-	-	-	-
Unigene0014652	2	2	0	69	136	103	0.07	0.06	0	1.95	4.22	2.83	0.0433333	3	6.11334	5.13277e-12	1.14706e-10	PMEI6	PREDICTED: 21 kDa protein-like [Prunus mume]	-	-	-	-	-	GO:0052689//carboxylic ester hydrolase activity	GO:0009892//negative regulation of metabolic process
Unigene0019510	169	168	175	624	491	513	3.57	3.2	4.34	11.2	9.69	8.97	3.70333	9.95333	1.42636	5.13627e-12	1.14706e-10	PER25	PREDICTED: LOW QUALITY PROTEIN: peroxidase 25 [Prunus mume]	Metabolism;Metabolism;Metabolism	Global and overview maps;Global and overview maps;Biosynthesis of other secondary metabolites	ko01100//Metabolic pathways;ko01110//Biosynthesis of secondary metabolites;ko00940//Phenylpropanoid biosynthesis	K00430;K00430;K00430	-	GO:0003824//catalytic activity;GO:0043169//cation binding;GO:0046906//tetrapyrrole binding	GO:0006950//response to stress;GO:0044710//single-organism metabolic process
Unigene0031747	63	82	66	0	0	0	5.58	6.57	6.88	0	0	0	6.34333	0.001	-12.631	5.26406e-12	1.17476e-10	--	PREDICTED: TMV resistance protein N-like [Prunus mume]	-	-	-	-	-	-	-
Unigene0013201	0	2	0	166	88	253	0	0.01	0	0.76	0.44	1.12	0.00333333	0.773333	7.85798	5.38499e-12	1.20089e-10	RE2	OSIGBa0134J07.9 [Oryza sativa Indica Group]	Metabolism;Metabolism;Metabolism;Genetic Information Processing	Global and overview maps;Nucleotide metabolism;Nucleotide metabolism;Transcription	ko01100//Metabolic pathways;ko00230//Purine metabolism;ko00240//Pyrimidine metabolism;ko03020//RNA polymerase	K03006;K03006;K03006;K03006	-	-	-
Unigene0011309	295	450	329	947	918	1019	5.95	8.21	7.8	16.25	17.32	17.03	7.32	16.8667	1.20426	5.4628e-12	1.21737e-10	TAD2	PREDICTED: tRNA-specific adenosine deaminase 2 [Prunus mume]	-	-	-	-	-	GO:0003824//catalytic activity;GO:0046914//transition metal ion binding	-
Unigene0017202	261	324	283	42	78	87	4.67	5.24	5.95	0.64	1.3	1.29	5.28667	1.07667	-2.29579	5.48068e-12	1.22049e-10	SRG1	PREDICTED: protein SRG1 [Prunus mume]	-	-	-	-	-	GO:0016706//oxidoreductase activity, acting on paired donors, with incorporation or reduction of molecular oxygen, 2-oxoglutarate as one donor, and incorporation of one atom each of oxygen into both donors;GO:0043169//cation binding	GO:0051553//flavone biosynthetic process
Unigene0000160	156	198	111	926	397	919	1.96	2.25	1.64	9.91	4.67	9.58	1.95	8.05333	2.04611	5.49874e-12	1.22364e-10	--	PREDICTED: disease resistance protein RGA2-like [Malus domestica]	-	-	-	-	-	-	-
Unigene0028847	59	83	71	0	0	0	6.64	8.44	9.39	0	0	0	8.15667	0.001	-12.9938	5.62924e-12	1.25178e-10	--	PREDICTED: putative disease resistance RPP13-like protein 1 [Prunus mume]	-	-	-	-	-	-	-
Unigene0001029	1	0	0	136	185	141	0.01	0	0	1.49	2.23	1.51	0.00333333	1.74333	9.03067	5.70447e-12	1.26761e-10	--	PREDICTED: ribulose-1,5 bisphosphate carboxylase/oxygenase large subunit N-methyltransferase, chloroplastic [Prunus mume]	-	-	-	-	GO:0009536//plastid	GO:0008757//S-adenosylmethionine-dependent methyltransferase activity	GO:0008152//metabolic process
Unigene0019753	0	2	1	127	92	87	0	0.02	0.01	1.15	0.91	0.77	0.01	0.943333	6.5597	5.77227e-12	1.28176e-10	--	PREDICTED: protein ACCELERATED CELL DEATH 6-like [Prunus mume]	-	-	-	-	-	-	-
Unigene0034414	652	597	505	273	265	235	8.53	7.06	7.77	3.04	3.24	2.55	7.78667	2.94333	-1.40355	5.7813e-12	1.28208e-10	--	PREDICTED: ankyrin repeat-containing protein At3g12360-like [Prunus mume]	-	-	-	-	-	-	-
Unigene0016137	97	91	44	0	0	0	3.94	3.34	2.1	0	0	0	3.12667	0.001	-11.6104	5.7819e-12	1.28208e-10	--	-	-	-	-	-	-	-	-
Unigene0017839	193	211	148	58	32	63	9.43	9.32	8.5	2.41	1.46	2.55	9.08333	2.14	-2.08561	5.8308e-12	1.292e-10	--	PREDICTED: LOW QUALITY PROTEIN: probable disease resistance protein At4g27220 [Prunus mume]	Organismal Systems	Environmental adaptation	ko04626//Plant-pathogen interaction	K13459	-	-	-
Unigene0002179	4014	3259	3809	1654	1474	2053	68.52	50.28	76.42	24.01	23.52	29.03	65.0733	25.52	-1.35044	5.94014e-12	1.3153e-10	ANR	anthocyanidin reductase [Prunus cerasifera]	Metabolism;Metabolism	Global and overview maps;Biosynthesis of other secondary metabolites	ko01110//Biosynthesis of secondary metabolites;ko00941//Flavonoid biosynthesis	K08695;K08695	-	GO:0016628//oxidoreductase activity, acting on the CH-CH group of donors, NAD or NADP as acceptor;GO:0048037//cofactor binding	GO:0009812//flavonoid metabolic process;GO:0009890//negative regulation of biosynthetic process;GO:0044710//single-organism metabolic process
Unigene0000646	64	91	57	0	0	0	3.63	4.67	3.8	0	0	0	4.03333	0.001	-11.9778	6.03364e-12	1.33506e-10	CIPK26	PREDICTED: transcription factor bHLH155-like isoform X2 [Prunus mume]	-	-	-	-	-	-	-
Unigene0002672	636	605	577	228	268	301	6.18	5.31	6.59	1.88	2.43	2.42	6.02667	2.24333	-1.42572	6.08799e-12	1.34613e-10	AAE18	PREDICTED: probable acyl-activating enzyme 18, peroxisomal [Prunus mume]	-	-	-	-	-	-	-
Unigene0030995	5926	7372	5388	3433	3622	3333	79.62	89.51	85.08	39.22	45.5	37.09	84.7367	40.6033	-1.06139	6.17676e-12	1.36479e-10	MYC2	PREDICTED: LOW QUALITY PROTEIN: transcription factor MYC2 [Prunus mume]	Environmental Information Processing;Environmental Information Processing	Signal transduction;Signal transduction	ko04075//Plant hormone signal transduction;ko04016//MAPK signaling pathway - plant	K13422;K13422	-	-	-
Unigene0021495	0	0	0	75	81	110	0	0	0	0.96	1.14	1.37	0.001	1.15667	10.1758	6.18948e-12	1.36663e-10	--	hypothetical protein PRUPE_ppa024520mg, partial [Prunus persica]	-	-	-	-	-	-	-
Unigene0007934	3593	4870	3382	2547	1814	2526	16.64	20.38	18.41	10.03	7.85	9.69	18.4767	9.19	-1.00757	6.30764e-12	1.39075e-10	yprA	PREDICTED: uncharacterized ATP-dependent helicase YprA [Prunus mume]	-	-	-	-	-	-	-
Unigene0012429	252	196	177	766	893	669	5.77	4.05	4.76	14.91	19.11	12.68	4.86	15.5667	1.67943	6.67347e-12	1.46934e-10	CYB5	PREDICTED: cytochrome b5 [Prunus mume]	-	-	-	-	-	GO:0043169//cation binding	-
Unigene0026957	904	965	787	2166	2596	2251	15.98	15.42	16.35	32.56	42.91	32.96	15.9167	36.1433	1.18319	6.71972e-12	1.47848e-10	THO7A	PREDICTED: LOW QUALITY PROTEIN: THO complex subunit 7A-like [Prunus mume]	Genetic Information Processing	Translation	ko03013//RNA transport	K13176	-	-	-
Unigene0025512	128	124	126	21	24	11	5.94	5.2	6.87	0.83	1.04	0.42	6.00333	0.763333	-2.97538	6.75168e-12	1.48447e-10	LEA41	PREDICTED: late embryogenesis abundant protein Lea5 [Prunus mume]	-	-	-	-	-	-	-
Unigene0024231	743	811	586	302	353	306	9.43	9.31	8.75	3.26	4.19	3.22	9.16333	3.55667	-1.36535	6.79683e-12	1.49334e-10	GLYR2	PREDICTED: glyoxylate/succinic semialdehyde reductase 2, chloroplastic [Prunus mume]	Metabolism;Metabolism;Metabolism;Metabolism	Global and overview maps;Global and overview maps;Carbohydrate metabolism;Carbohydrate metabolism	ko01100//Metabolic pathways;ko01200//Carbon metabolism;ko00630//Glyoxylate and dicarboxylate metabolism;ko00650//Butanoate metabolism	K18121;K18121;K18121;K18121	-	-	-
Unigene0011303	2728	3336	2500	1835	1147	1662	22.68	25.06	24.42	12.97	8.91	11.44	24.0533	11.1067	-1.11481	6.88951e-12	1.51264e-10	fluG	PREDICTED: protein fluG [Prunus mume]	-	-	-	-	GO:0044444//cytoplasmic part	GO:0015631//tubulin binding;GO:0016211//ammonia ligase activity	GO:0001101//response to acid chemical;GO:0006541//glutamine metabolic process;GO:0006568//tryptophan metabolic process;GO:0009683//indoleacetic acid metabolic process;GO:0009791//post-embryonic development;GO:0010243//response to organonitrogen compound;GO:0048856//anatomical structure development
Unigene0002922	267	277	265	86	102	94	29.75	27.9	34.71	8.15	10.63	8.68	30.7867	9.15333	-1.74994	7.00935e-12	1.53787e-10	At1g06650	PREDICTED: 1-aminocyclopropane-1-carboxylate oxidase homolog 1-like [Prunus mume]	-	-	-	-	-	-	-
Unigene0022607	46	100	9	814	414	1000	0.26	0.51	0.06	3.94	2.2	4.72	0.276667	3.62	3.70977	7.22448e-12	1.58396e-10	ANTR3	PREDICTED: LOW QUALITY PROTEIN: probable anion transporter 3, chloroplastic [Prunus mume]	-	-	-	-	-	-	-
Unigene0035427	259	220	245	767	622	752	2.84	2.18	3.16	7.16	6.38	6.84	2.72667	6.79333	1.31698	7.26341e-12	1.59138e-10	--	PREDICTED: probable RNA-dependent RNA polymerase 3 [Prunus mume]	-	-	-	-	-	-	-
Unigene0025029	741	648	729	2255	2034	1908	13.9	10.99	16.08	35.98	35.68	29.65	13.6567	33.77	1.30614	7.28173e-12	1.59427e-10	N3	PREDICTED: bidirectional sugar transporter N3 [Prunus mume]	-	-	-	-	GO:0016021//integral component of membrane	GO:0051119//sugar transmembrane transporter activity	GO:0008643//carbohydrate transport
Unigene0013261	85	106	72	11	1	7	5.66	6.38	5.64	0.62	0.06	0.39	5.89333	0.356667	-4.04644	7.36808e-12	1.61204e-10	--	PREDICTED: dynamin-related protein 4C-like [Prunus mume]	-	-	-	-	-	-	-
Unigene0023299	0	0	0	88	105	75	0	0	0	1.22	1.6	1.01	0.001	1.27667	10.3182	7.38448e-12	1.6145e-10	--	-	-	-	-	-	-	-	-
Unigene0027630	113	181	92	19	25	26	1.98	2.86	1.89	0.28	0.41	0.38	2.24333	0.356667	-2.653	7.49778e-12	1.63813e-10	--	BnaAnng27030D [Brassica napus]	-	-	-	-	-	-	-
Unigene0000391	170	174	166	58	32	49	2.5	2.31	2.86	0.72	0.44	0.6	2.55667	0.586667	-2.12365	7.58301e-12	1.65559e-10	--	PREDICTED: ethylene-responsive transcription factor-like protein At4g13040 [Prunus mume]	-	-	-	-	-	-	-
Unigene0000098	211	377	214	1408	708	1924	4.38	7.07	5.22	24.83	13.73	33.05	5.55667	23.87	2.10291	7.70884e-12	1.68188e-10	--	-	-	-	-	-	-	-	-
Unigene0005482	1028	723	493	3260	3551	2456	29.36	18.66	16.55	79.17	94.82	58.1	21.5233	77.3633	1.84575	7.79723e-12	1.69998e-10	At3g15810	PREDICTED: protein LURP-one-related 12-like [Prunus mume]	-	-	-	-	-	-	-
Unigene0002210	188	118	143	11	12	32	18.37	10.42	16.43	0.91	1.1	2.59	15.0733	1.53333	-3.29726	7.84367e-12	1.70891e-10	--	PREDICTED: glycine-rich cell wall structural protein 1.8-like [Prunus mume]	-	-	-	-	-	-	-
Unigene0027704	62	73	68	0	0	0	0.55	0.58	0.7	0	0	0	0.61	0.001	-9.25267	8.12249e-12	1.76843e-10	--	mutator-like transposase [Rosa rugosa]	-	-	-	-	-	-	-
Unigene0020471	492	524	429	1056	1157	1248	7.04	6.77	7.21	12.85	15.47	14.79	7.00667	14.37	1.03626	8.14008e-12	1.77078e-10	At5g47470	PREDICTED: WAT1-related protein At5g47470 isoform X1 [Prunus mume]	-	-	-	-	GO:0031224//intrinsic component of membrane	GO:0005215//transporter activity	GO:0044763//single-organism cellular process
Unigene0001480	69	71	61	0	0	0	5.14	4.78	5.34	0	0	0	5.08667	0.001	-12.3125	8.14463e-12	1.77078e-10	--	PREDICTED: probable disease resistance protein RPP1 [Prunus mume]	-	-	-	-	-	-	-
Unigene0009858	146	306	246	49	26	57	1.05	1.99	2.08	0.3	0.17	0.34	1.70667	0.27	-2.66015	8.1763e-12	1.77598e-10	--	-	-	-	-	-	-	-	-
Unigene0020385	0	0	0	78	74	104	0	0	0	2.7	2.82	3.51	0.001	3.01	11.5555	8.17996e-12	1.77598e-10	--	-	-	-	-	-	-	-	-
Unigene0028870	0	0	0	85	79	87	0	0	0	1.87	1.91	1.86	0.001	1.88	10.8765	8.19019e-12	1.77697e-10	--	-	-	-	-	-	-	-	-
Unigene0021901	2336	2223	1703	4748	5152	4917	24.13	20.75	20.67	41.7	49.75	42.06	21.85	44.5033	1.02628	8.30088e-12	1.79973e-10	SPX2	PREDICTED: SPX domain-containing protein 1-like [Prunus mume]	-	-	-	-	-	-	-
Unigene0025552	0	0	0	72	81	106	0	0	0	1	1.23	1.43	0.001	1.22	10.2527	8.32788e-12	1.80433e-10	--	hypothetical protein PRUPE_8G056200 [Prunus persica]	-	-	-	-	-	-	-
Unigene0015106	240	211	187	83	60	78	4.63	3.68	4.24	1.36	1.08	1.25	4.18333	1.23	-1.76599	8.60999e-12	1.86416e-10	--	PREDICTED: proline-rich protein 4 [Prunus mume]	-	-	-	-	-	-	GO:0007275//multicellular organism development;GO:0010817//regulation of hormone levels;GO:0016043//cellular component organization;GO:0016049//cell growth;GO:0048869//cellular developmental process;GO:0060560//developmental growth involved in morphogenesis
Unigene0023142	364	272	258	872	832	913	20.14	13.6	16.78	41.03	43.04	41.84	16.84	41.97	1.31747	8.66913e-12	1.87567e-10	--	PREDICTED: uncharacterized protein LOC103322425 isoform X1 [Prunus mume]	-	-	-	-	-	-	-
Unigene0029184	2284	3512	2467	1322	1319	1604	24.95	34.67	31.68	12.28	13.47	14.51	30.4333	13.42	-1.18127	8.78522e-12	1.89947e-10	EGY3	PREDICTED: probable zinc metallopeptidase EGY3, chloroplastic [Prunus mume]	-	-	-	-	-	-	-
Unigene0013227	590	695	455	257	283	282	9.52	10.13	8.63	3.53	4.27	3.77	9.42667	3.85667	-1.28939	9.11654e-12	1.96838e-10	At3g55800	PREDICTED: sedoheptulose-1,7-bisphosphatase, chloroplastic [Fragaria vesca subsp. vesca] [Fragaria vesca]	Metabolism;Metabolism;Metabolism	Global and overview maps;Global and overview maps;Energy metabolism	ko01100//Metabolic pathways;ko01200//Carbon metabolism;ko00710//Carbon fixation in photosynthetic organisms	K01100;K01100;K01100	GO:0005576//extracellular region;GO:0009526//plastid envelope;GO:0009532//plastid stroma	GO:0043169//cation binding;GO:0050308//sugar-phosphatase activity	GO:0000097//sulfur amino acid biosynthetic process;GO:0005982//starch metabolic process;GO:0005985//sucrose metabolic process;GO:0006090//pyruvate metabolic process;GO:0006605//protein targeting;GO:0006739//NADP metabolic process;GO:0006996//organelle organization;GO:0009620//response to fungus;GO:0009696//salicylic acid metabolic process;GO:0009755//hormone-mediated signaling pathway;GO:0009767/…
Unigene0002939	3181	3163	2707	1577	969	1796	28.18	25.32	28.18	11.88	8.03	13.18	27.2267	11.03	-1.30359	9.24343e-12	1.9944e-10	SBT5.6	PREDICTED: subtilisin-like protease SBT5.6 [Prunus mume]	-	-	-	-	-	GO:0016787//hydrolase activity	GO:0019538//protein metabolic process
Unigene0017373	81	84	81	0	5	0	2.16	2.03	2.54	0	0.12	0	2.24333	0.04	-5.8095	9.27102e-12	1.99897e-10	--	PREDICTED: uncharacterized protein LOC103334711 [Prunus mume]	-	-	-	-	-	-	-
Unigene0026685	73	65	62	0	0	0	4.26	3.43	4.25	0	0	0	3.98	0.001	-11.9586	9.5324e-12	2.05391e-10	--	PREDICTED: serine/threonine-protein phosphatase 7 long form homolog [Pyrus x bretschneideri]	-	-	-	-	-	-	-
Unigene0017599	0	2	0	114	173	136	0	0.02	0	1	1.67	1.17	0.00666667	1.28	7.58496	9.66798e-12	2.08168e-10	--	polyprotein [Cajanus cajan]	-	-	-	-	-	-	-
Unigene0030886	898	838	636	149	259	304	33	27.83	27.47	4.66	8.9	9.25	29.4333	7.60333	-1.95275	9.79845e-12	2.10832e-10	--	PREDICTED: 5'-adenylylsulfate reductase 1, chloroplastic-like [Prunus mume]	-	-	-	-	-	-	-
Unigene0019252	0	0	2	124	162	122	0	0	0.06	2.54	3.65	2.43	0.02	2.87333	7.16658	9.86603e-12	2.1214e-10	--	PREDICTED: protein DEHYDRATION-INDUCED 19-like [Pyrus x bretschneideri]	-	-	-	-	-	-	-
Unigene0006095	2	6	3	99	52	122	0.05	0.13	0.08	1.97	1.14	2.37	0.0866667	1.82667	4.39759	9.97032e-12	2.14235e-10	--	hypothetical protein PRUPE_ppa019331mg [Prunus persica]	-	-	-	-	-	-	-
Unigene0016748	889	1121	748	2380	1673	2713	7.33	8.36	7.25	16.69	12.9	18.54	7.64667	16.0433	1.06907	1.00018e-11	2.14764e-10	PIX13	PREDICTED: probable LRR receptor-like serine/threonine-protein kinase At5g48740 isoform X3 [Prunus mume]	-	-	-	-	-	-	-
Unigene0012328	36	111	74	429	414	471	0.51	1.43	1.24	5.2	5.52	5.56	1.06	5.42667	2.356	1.01883e-11	2.18617e-10	PLDZETA1	PREDICTED: transcriptional regulator SUPERMAN [Prunus mume]	Metabolism;Metabolism;Cellular Processes;Metabolism;Metabolism	Global and overview maps;Global and overview maps;Transport and catabolism;Lipid metabolism;Lipid metabolism	ko01100//Metabolic pathways;ko01110//Biosynthesis of secondary metabolites;ko04144//Endocytosis;ko00564//Glycerophospholipid metabolism;ko00565//Ether lipid metabolism	K01115;K01115;K01115;K01115;K01115	-	-	-
Unigene0022000	1262	1486	1236	357	581	435	16.22	17.27	18.68	3.9	6.98	4.63	17.39	5.17	-1.75002	1.02056e-11	2.18838e-10	IQM4	PREDICTED: IQ domain-containing protein IQM1 [Prunus mume]	-	-	-	-	-	-	-
Unigene0026995	2037	1720	1631	4127	4345	4741	24.28	18.53	22.85	41.82	48.41	46.8	21.8867	45.6767	1.06141	1.03791e-11	2.22254e-10	At2g39020	PREDICTED: probable acetyltransferase NATA1-like [Prunus mume]	-	-	-	-	-	GO:0016747//transferase activity, transferring acyl groups other than amino-acyl groups	-
Unigene0028856	4	10	1	175	56	197	0.06	0.14	0.02	2.38	0.84	2.61	0.0733333	1.94333	4.72792	1.04618e-11	2.23871e-10	--	PREDICTED: uncharacterized protein LOC103333580 [Prunus mume]	-	-	-	-	-	-	-
Unigene0034845	0	0	0	84	99	74	0	0	0	1.97	2.55	1.69	0.001	2.07	11.0154	1.0477e-11	2.24042e-10	--	PREDICTED: tropinone reductase homolog At5g06060 isoform X1 [Oryza sativa Japonica Group]	Metabolism;Metabolism;Metabolism	Global and overview maps;Global and overview maps;Biosynthesis of other secondary metabolites	ko01100//Metabolic pathways;ko01110//Biosynthesis of secondary metabolites;ko00960//Tropane, piperidine and pyridine alkaloid biosynthesis	K08081;K08081;K08081	-	-	-
Unigene0002829	1586	1804	1465	818	521	972	17.71	18.2	19.22	7.77	5.44	8.99	18.3767	7.4	-1.31228	1.08344e-11	2.31527e-10	--	hypothetical protein PRUPE_3G301600 [Prunus persica]	-	-	-	-	-	-	-
Unigene0000048	128	172	90	1769	351	1492	0.33	0.4	0.28	3.91	0.85	3.21	0.336667	2.65667	2.98022	1.0848e-11	2.31658e-10	pol	PREDICTED: protein NYNRIN-like [Brassica rapa]	-	-	-	-	-	-	-
Unigene0026951	710	839	732	1920	1852	1760	11.28	12.05	13.67	25.94	27.51	23.16	12.3333	25.5367	1.05001	1.10002e-11	2.34749e-10	CRD	PREDICTED: 12S seed storage protein CRD-like [Prunus mume]	-	-	-	-	-	-	-
Unigene0007931	55	66	32	340	208	229	4.65	5.04	3.18	24.45	16.45	16.04	4.29	18.98	2.14543	1.13334e-11	2.41693e-10	--	PREDICTED: uncharacterized protein LOC107880719 [Prunus mume]	-	-	-	-	-	-	-
Unigene0027274	672	502	615	1785	1883	1953	11.48	7.75	12.35	25.93	30.07	27.63	10.5267	27.8767	1.40501	1.19867e-11	2.55452e-10	--	Aldose 1-epimerase family protein isoform 1 [Theobroma cacao]	Metabolism;Metabolism;Metabolism	Global and overview maps;Global and overview maps;Carbohydrate metabolism	ko01100//Metabolic pathways;ko01110//Biosynthesis of secondary metabolites;ko00010//Glycolysis / Gluconeogenesis	K01792;K01792;K01792	-	GO:0003824//catalytic activity;GO:0005488//binding	GO:0044238//primary metabolic process
Unigene0027924	0	0	2	139	96	154	0	0	0.03	1.61	1.22	1.73	0.01	1.52	7.24793	1.19963e-11	2.55482e-10	--	PREDICTED: uncharacterized protein LOC101298370 [Fragaria vesca subsp. vesca] [Fragaria vesca]	-	-	-	-	-	-	-
Unigene0036097	0	1	1	128	130	120	0	0.03	0.03	3.06	3.42	2.8	0.02	3.09333	7.27302	1.20843e-11	2.57005e-10	EXLB1	PREDICTED: expansin-like B1 isoform X1 [Prunus mume]	-	-	-	-	-	-	-
Unigene0004120	79	73	72	6	10	8	1.38	1.15	1.48	0.09	0.16	0.12	1.33667	0.123333	-3.43801	1.22861e-11	2.6112e-10	GOLS1	PREDICTED: galactinol synthase 1 [Prunus mume]	Metabolism	Carbohydrate metabolism	ko00052//Galactose metabolism	K18819	GO:0044424//intracellular part	GO:0035250//UDP-galactosyltransferase activity;GO:0043169//cation binding	GO:0006950//response to stress;GO:0019318//hexose metabolic process
Unigene0000143	234	298	211	56	10	35	7.44	8.56	7.89	1.51	0.3	0.92	7.96333	0.91	-3.12943	1.2676e-11	2.69223e-10	N	PREDICTED: TMV resistance protein N [Prunus mume]	-	-	-	-	-	-	-
Unigene0016606	0	0	0	158	37	156	0	0	0	6.59	1.7	6.34	0.001	4.87667	12.2517	1.28341e-11	2.72396e-10	--	FB_Mr5-like protein [Malus x robusta]	-	-	-	-	-	-	-
Unigene0001037	47	31	34	182	185	203	0.71	0.42	0.6	2.33	2.6	2.53	0.576667	2.48667	2.1084	1.32325e-11	2.80279e-10	ERF113	PREDICTED: ethylene-responsive transcription factor ERF113 [Prunus mume]	-	-	-	-	-	-	-
Unigene0036325	3	0	0	107	117	84	0.09	0	0	2.87	3.46	2.2	0.03	2.84333	6.56648	1.33579e-11	2.82743e-10	--	PREDICTED: rust resistance kinase Lr10-like [Prunus mume]	-	-	-	-	-	-	-
Unigene0024811	0	0	0	105	103	60	0	0	0	3.69	3.98	2.05	0.001	3.24	11.6618	1.36851e-11	2.89473e-10	DSP3	PREDICTED: probable tyrosine-protein phosphatase At1g05000 [Prunus mume]	-	-	-	-	-	GO:0042578//phosphoric ester hydrolase activity	GO:0006470//protein dephosphorylation
Unigene0029267	0	0	0	99	66	80	0	0	0	4.61	3.38	3.63	0.001	3.87333	11.9194	1.42152e-11	3.00483e-10	--	-	-	-	-	-	-	-	-
Unigene0016036	159	116	84	431	477	813	1.25	0.82	0.78	2.88	3.51	5.29	0.95	3.89333	2.03501	1.45528e-11	3.07411e-10	Bp10	ascorbate oxidase 1 [Prunus avium]	-	-	-	-	-	GO:0016682//oxidoreductase activity, acting on diphenols and related substances as donors, oxygen as acceptor	GO:0044710//single-organism metabolic process
Unigene0034992	0	0	0	76	61	125	0	0	0	4.88	4.3	7.81	0.001	5.66333	12.4674	1.47728e-11	3.11847e-10	RPP5	PREDICTED: probable disease resistance protein RPP1 isoform X2 [Prunus mume]	-	-	-	-	-	-	-
Unigene0014607	6362	9475	5898	4122	3750	4517	76.28	102.67	83.11	42.02	42.04	44.86	87.3533	42.9733	-1.02342	1.56835e-11	3.30623e-10	FKBP65	PREDICTED: 70 kDa peptidyl-prolyl isomerase-like [Prunus mume]	-	-	-	-	-	GO:0003824//catalytic activity	-
Unigene0004949	104	77	80	315	402	370	4.47	2.99	4.04	11.51	16.15	13.17	3.83333	13.61	1.828	1.60845e-11	3.38849e-10	--	unnamed protein product, partial [Vitis vinifera]	-	-	-	-	-	-	-
Unigene0007891	105	45	74	0	0	0	4.73	1.83	3.92	0	0	0	3.49333	0.001	-11.7704	1.63673e-11	3.44574e-10	--	-	-	-	-	-	-	-	-
Unigene0012329	377	495	320	1146	779	1265	2.55	3.02	2.54	6.58	4.92	7.08	2.70333	6.19333	1.19598	1.68176e-11	3.53816e-10	PLDZETA1	PREDICTED: phospholipase D zeta 1 [Prunus mume]	Metabolism;Metabolism;Cellular Processes;Metabolism;Metabolism	Global and overview maps;Global and overview maps;Transport and catabolism;Lipid metabolism;Lipid metabolism	ko01100//Metabolic pathways;ko01110//Biosynthesis of secondary metabolites;ko04144//Endocytosis;ko00564//Glycerophospholipid metabolism;ko00565//Ether lipid metabolism	K01115;K01115;K01115;K01115;K01115	-	-	-
Unigene0004131	110	96	86	1	0	1	2.99	2.36	2.75	0.02	0	0.02	2.7	0.0133333	-7.66178	1.68799e-11	3.54887e-10	CIPK6	PREDICTED: CBL-interacting serine/threonine-protein kinase 6 [Prunus mume]	-	-	-	-	-	-	-
Unigene0017166	94	54	58	0	0	0	3.67	1.91	2.67	0	0	0	2.75	0.001	-11.4252	1.70199e-11	3.57349e-10	EC1.2	PREDICTED: egg cell-secreted protein 1.3-like [Prunus mume]	-	-	-	-	-	-	-
Unigene0029979	0	0	0	105	106	57	0	0	0	2.41	2.67	1.27	0.001	2.11667	11.0476	1.70199e-11	3.57349e-10	--	PREDICTED: uncharacterized protein LOC103322723 [Prunus mume]	-	-	-	-	-	-	-
Unigene0029849	56	101	78	1	0	2	1.83	2.99	3	0.03	0	0.05	2.60667	0.0266667	-6.61102	1.73488e-11	3.63765e-10	LATS2	PREDICTED: serine/threonine-protein kinase tricorner-like [Prunus mume]	-	-	-	-	-	-	-
Unigene0033537	1	4	1	90	73	68	0.09	0.32	0.1	6.68	5.96	4.92	0.17	5.85333	5.10565	1.7701e-11	3.70902e-10	--	-	-	-	-	-	-	-	-
Unigene0005710	103	100	87	0	2	0	7.29	6.4	7.24	0	0.13	0	6.97667	0.0433333	-7.33092	1.80234e-11	3.77402e-10	HCT2	alcohol acyl-transferase, partial [Prunus mume]	Metabolism;Metabolism;Metabolism;Metabolism;Metabolism	Global and overview maps;Global and overview maps;Biosynthesis of other secondary metabolites;Biosynthesis of other secondary metabolites;Biosynthesis of other secondary metabolites	ko01100//Metabolic pathways;ko01110//Biosynthesis of secondary metabolites;ko00940//Phenylpropanoid biosynthesis;ko00941//Flavonoid biosynthesis;ko00945//Stilbenoid, diarylheptanoid and gingerol biosynthesis	K13065;K13065;K13065;K13065;K13065	-	-	-
Unigene0025990	22	19	15	151	121	110	0.22	0.17	0.17	1.27	1.12	0.9	0.186667	1.09667	2.55459	1.82871e-11	3.82668e-10	--	MuDR family transposase [Citrus limon]	-	-	-	-	-	-	-
Unigene0031435	91	150	69	356	414	605	1.53	2.28	1.36	5.08	6.5	8.42	1.72333	6.66667	1.95176	1.83266e-11	3.83237e-10	--	hypothetical protein PRUPE_ppa014531mg [Prunus persica]	-	-	-	-	-	-	-
Unigene0035216	897	817	658	387	266	453	9.67	7.96	8.34	3.55	2.68	4.05	8.65667	3.42667	-1.33701	1.84773e-11	3.86131e-10	IDD2	PREDICTED: protein indeterminate-domain 2 [Prunus mume]	-	-	-	-	-	-	-
Unigene0017946	12	3	0	153	101	162	0.2	0.05	0	2.17	1.57	2.24	0.0833333	1.99333	4.58015	1.89147e-11	3.94812e-10	CYP78A5	PREDICTED: cytochrome P450 78A5 [Prunus mume]	-	-	-	-	-	GO:0016709//oxidoreductase activity, acting on paired donors, with incorporation or reduction of molecular oxygen, NAD(P)H as one donor, and incorporation of one atom of oxygen;GO:0046906//tetrapyrrole binding;GO:0046914//transition metal ion binding	GO:0044710//single-organism metabolic process
Unigene0018207	3792	4695	3272	2086	1455	2580	64.41	72.07	65.32	30.13	23.11	36.3	67.2667	29.8467	-1.17232	1.9057e-11	3.97447e-10	KUA1	PREDICTED: transcription factor MYB1R1 [Prunus mume]	-	-	-	-	-	GO:0003676//nucleic acid binding;GO:0046914//transition metal ion binding	-
Unigene0024461	75	136	149	12	17	16	2.66	4.36	6.21	0.36	0.56	0.47	4.41	0.463333	-3.25066	1.93515e-11	4.03319e-10	HIPP20	PREDICTED: heavy metal-associated isoprenylated plant protein 20 [Prunus mume]	-	-	-	-	-	GO:0043169//cation binding	-
Unigene0013525	51	96	54	0	0	0	0.99	1.69	1.24	0	0	0	1.30667	0.001	-10.3517	1.95699e-11	4.07599e-10	--	-	-	-	-	-	-	-	-
Unigene0022639	64	75	49	0	0	0	4.04	4.28	3.63	0	0	0	3.98333	0.001	-11.9598	1.99618e-11	4.15208e-10	--	hypothetical protein PRUPE_2G046900 [Prunus persica]	-	-	-	-	-	-	-
Unigene0033050	59	87	62	1	2	7	0.59	0.79	0.73	0.01	0.02	0.06	0.703333	0.03	-4.55117	2.09301e-11	4.35058e-10	--	PREDICTED: uncharacterized protein LOC107880278 [Prunus mume]	-	-	-	-	-	-	-
Unigene0018129	66	58	64	0	0	0	1.3	1.04	1.49	0	0	0	1.27667	0.001	-10.3182	2.11071e-11	4.38447e-10	--	PREDICTED: receptor-like protein 2 [Prunus mume]	-	-	-	-	-	-	-
Unigene0013504	76	69	46	0	0	0	8.02	6.58	5.7	0	0	0	6.76667	0.001	-12.7242	2.14127e-11	4.445e-10	--	PREDICTED: AP-4 complex subunit epsilon [Prunus mume]	-	-	-	-	GO:0005911//cell-cell junction;GO:0043234//protein complex;GO:0044444//cytoplasmic part	-	GO:0006006//glucose metabolic process;GO:0006486//protein glycosylation;GO:0015031//protein transport
Unigene0012462	155	173	185	8	23	3	3.74	3.77	5.24	0.16	0.52	0.06	4.25	0.246667	-4.10683	2.15174e-11	4.46376e-10	VDAC1	PREDICTED: mitochondrial outer membrane protein porin of 36 kDa-like [Prunus mume]	-	-	-	-	-	-	-
Unigene0027532	60	60	56	4	1	3	4.71	4.25	5.16	0.27	0.07	0.19	4.70667	0.176667	-4.7356	2.17519e-11	4.50941e-10	CYP76B6	PREDICTED: geraniol 8-hydroxylase-like [Prunus mume]	-	-	-	-	-	-	-
Unigene0034936	1262	1492	1382	382	515	695	24.61	26.29	31.67	6.33	9.39	11.22	27.5233	8.98	-1.61587	2.21784e-11	4.59478e-10	TIP1-3	PREDICTED: aquaporin TIP1-3 [Prunus mume]	-	-	-	-	GO:0031090//organelle membrane;GO:0031224//intrinsic component of membrane;GO:0043231//intracellular membrane-bounded organelle	GO:0005372//water transmembrane transporter activity;GO:0042887//amide transmembrane transporter activity	GO:0015840//urea transport;GO:0042044//fluid transport;GO:0050896//response to stimulus
Unigene0018152	4711	3945	3904	12336	12652	10270	60.21	45.57	58.64	134.05	151.17	108.71	54.8067	131.31	1.26055	2.2793e-11	4.71774e-10	RPS18A	PREDICTED: 40S ribosomal protein S18-like [Juglans regia]	Genetic Information Processing	Translation	ko03010//Ribosome	K02964	-	-	-
Unigene0008757	12	30	10	138	219	153	0.38	0.85	0.37	3.67	6.41	3.97	0.533333	4.68333	3.13443	2.28022e-11	4.71774e-10	--	PREDICTED: uncharacterized protein LOC103332038 [Prunus mume]	-	-	-	-	-	-	-
Unigene0000205	122	109	69	0	2	0	0.87	0.7	0.58	0	0.01	0	0.716667	0.00333333	-7.74819	2.2896e-11	4.73401e-10	At3g47570	PREDICTED: probable LRR receptor-like serine/threonine-protein kinase At3g47570 [Prunus mume]	-	-	-	-	-	-	-
Unigene0002558	701	940	488	276	217	362	7.23	8.77	5.92	2.42	2.09	3.09	7.30667	2.53333	-1.52818	2.33814e-11	4.83118e-10	CAT1	PREDICTED: cationic amino acid transporter 1-like [Prunus mume]	-	-	-	-	GO:0031224//intrinsic component of membrane	GO:0046943//carboxylic acid transmembrane transporter activity	-
Unigene0033167	2	2	2	96	67	62	0.04	0.04	0.05	1.8	1.38	1.13	0.0433333	1.43667	5.0511	2.37483e-11	4.90374e-10	PER43	PREDICTED: peroxidase 43 [Prunus mume]	Metabolism;Metabolism;Metabolism	Global and overview maps;Global and overview maps;Biosynthesis of other secondary metabolites	ko01100//Metabolic pathways;ko01110//Biosynthesis of secondary metabolites;ko00940//Phenylpropanoid biosynthesis	K00430;K00430;K00430	-	GO:0003824//catalytic activity;GO:0043169//cation binding;GO:0046906//tetrapyrrole binding	GO:0006950//response to stress;GO:0044710//single-organism metabolic process
Unigene0012722	65	71	55	0	2	2	1.78	1.76	1.77	0	0.05	0.05	1.77	0.0333333	-5.73064	2.43158e-11	5.01761e-10	COB	PREDICTED: COBRA-like protein 1 [Prunus mume]	-	-	-	-	GO:0016020//membrane	-	GO:0044763//single-organism cellular process
Unigene0014862	0	0	0	95	58	82	0	0	0	1.47	0.99	1.23	0.001	1.23	10.2644	2.50686e-11	5.16953e-10	--	hypothetical protein PRUPE_1G509600 [Prunus persica]	-	-	-	-	-	-	-
Unigene0009099	164	179	140	14	30	41	1.79	1.77	1.8	0.13	0.31	0.37	1.78667	0.27	-2.72624	2.67298e-11	5.50119e-10	ARG7	PREDICTED: indole-3-acetic acid-induced protein ARG7-like [Prunus mume]	Environmental Information Processing	Signal transduction	ko04075//Plant hormone signal transduction	K14488	-	-	-
Unigene0013337	1021	787	642	2802	2014	2213	13.74	9.57	10.15	32.06	25.34	24.67	11.1533	27.3567	1.29442	2.70478e-11	5.56297e-10	HHT1	PREDICTED: taxadien-5-alpha-ol O-acetyltransferase [Prunus mume]	-	-	-	-	-	GO:0016747//transferase activity, transferring acyl groups other than amino-acyl groups	-
Unigene0000678	15	3	4	134	127	111	0.16	0.03	0.05	1.23	1.28	0.99	0.08	1.16667	3.86625	2.72243e-11	5.59558e-10	At3g47570	PREDICTED: probable LRR receptor-like serine/threonine-protein kinase At3g47570 isoform X1 [Prunus mume]	-	-	-	-	-	-	-
Unigene0022051	0	0	0	86	60	82	0	0	0	6.32	4.85	5.87	0.001	5.68	12.4717	2.78528e-11	5.71725e-10	--	FB_MR5 [Malus x robusta]	-	-	-	-	-	-	-
Unigene0025287	250	199	239	794	677	715	3.19	2.29	3.58	8.61	8.07	7.55	3.02	8.07667	1.41921	3.01197e-11	6.17851e-10	DTX33	PREDICTED: protein DETOXIFICATION 33 [Prunus mume]	-	-	-	-	GO:0031224//intrinsic component of membrane	GO:0015291//secondary active transmembrane transporter activity	GO:0015893//drug transport;GO:0044763//single-organism cellular process
Unigene0017870	63	49	54	213	267	269	1.29	0.91	1.3	3.71	5.12	4.57	1.16667	4.46667	1.93681	3.1087e-11	6.37273e-10	IPT5	PREDICTED: adenylate isopentenyltransferase 5, chloroplastic-like [Prunus mume]	Metabolism;Metabolism;Metabolism	Global and overview maps;Global and overview maps;Metabolism of terpenoids and polyketides	ko01100//Metabolic pathways;ko01110//Biosynthesis of secondary metabolites;ko00908//Zeatin biosynthesis	K10760;K10760;K10760	-	-	-
Unigene0000549	975	948	824	436	199	388	3.67	3.22	3.64	1.39	0.7	1.21	3.51	1.1	-1.67397	3.1458e-11	6.44455e-10	RE1	Cysteine-rich RLK (receptor-like protein kinase) 8 [Dorcoceras hygrometricum]	-	-	-	-	-	-	-
Unigene0036450	94	54	81	370	299	409	1.52	0.79	1.54	5.07	4.51	5.46	1.28333	5.01333	1.96587	3.19499e-11	6.54103e-10	TPPD	PREDICTED: probable trehalose-phosphate phosphatase D [Prunus mume]	Metabolism;Metabolism	Global and overview maps;Carbohydrate metabolism	ko01100//Metabolic pathways;ko00500//Starch and sucrose metabolism	K01087;K01087	-	GO:0019203//carbohydrate phosphatase activity	GO:0005991//trehalose metabolic process;GO:0006796//phosphate-containing compound metabolic process
Unigene0000547	79	132	82	0	0	2	0.61	0.92	0.74	0	0	0.01	0.756667	0.00333333	-7.82655	3.23868e-11	6.62592e-10	HSP70	PREDICTED: heat shock 70 kDa protein 18-like [Prunus mume]	Genetic Information Processing;Genetic Information Processing;Cellular Processes	Folding, sorting and degradation;Transcription;Transport and catabolism	ko04141//Protein processing in endoplasmic reticulum;ko03040//Spliceosome;ko04144//Endocytosis	K03283;K03283;K03283	-	-	-
Unigene0013654	942	1204	832	395	498	513	14.07	16.25	14.6	5.02	6.95	6.35	14.9733	6.10667	-1.29394	3.2407e-11	6.62592e-10	--	PREDICTED: uncharacterized protein LOC103319529 isoform X1 [Prunus mume]	-	-	-	-	-	-	-
Unigene0025444	18	12	45	271	305	321	0.42	0.25	1.24	5.38	6.66	6.21	0.636667	6.08333	3.25625	3.25558e-11	6.65199e-10	RHA2A	PREDICTED: E3 ubiquitin-protein ligase RHA2A [Prunus mume]	-	-	-	-	-	-	-
Unigene0020737	99	108	78	21	13	22	6.54	6.45	6.06	1.18	0.8	1.2	6.35	1.06	-2.58269	3.32408e-11	6.78752e-10	--	PREDICTED: uncharacterized protein LOC103426835 [Malus domestica]	-	-	-	-	-	-	-
Unigene0009762	70	107	35	0	0	0	2.36	3.26	1.39	0	0	0	2.33667	0.001	-11.1902	3.32641e-11	6.78783e-10	--	hypothetical protein PRUPE_ppa018448mg, partial [Prunus persica]	-	-	-	-	-	-	-
Unigene0034230	62	52	74	0	0	0	1.8	1.37	2.53	0	0	0	1.9	0.001	-10.8918	3.36112e-11	6.85419e-10	--	-	-	-	-	-	-	-	-
Unigene0007409	2548	2903	2287	1392	1522	1395	48.34	49.78	51	22.46	27	21.92	49.7067	23.7933	-1.06288	3.37211e-11	6.87211e-10	DOF3.4	PREDICTED: dof zinc finger protein DOF3.4 [Prunus mume]	-	-	-	-	-	-	-
Unigene0015651	58	84	44	0	0	0	1.11	1.45	0.99	0	0	0	1.18333	0.001	-10.2086	3.43389e-11	6.99345e-10	--	-	-	-	-	-	-	-	-
Unigene0000103	48	72	63	0	0	0	0.77	1.04	1.18	0	0	0	0.996667	0.001	-9.96097	3.46271e-11	7.04755e-10	--	-	-	-	-	-	-	-	-
Unigene0029542	0	0	0	68	63	95	0	0	0	3	3.05	4.08	0.001	3.37667	11.7214	3.50028e-11	7.11937e-10	--	PREDICTED: TMV resistance protein N-like [Prunus mume]	-	-	-	-	-	-	-
Unigene0032033	544	624	530	331	248	336	4.18	4.33	4.78	2.16	1.78	2.14	4.43	2.02667	-1.1282	3.51317e-11	7.14094e-10	--	PREDICTED: embryonic polyadenylate-binding protein 2-B-like isoform X1 [Prunus mume]	Genetic Information Processing	Translation	ko03015//mRNA surveillance pathway	K14396	-	-	-
Unigene0003375	0	0	2	160	82	130	0	0	0.01	0.55	0.31	0.43	0.00333333	0.43	7.01123	3.69754e-11	7.51079e-10	pol	reverse transcriptase [Corchorus capsularis]	-	-	-	-	-	-	-
Unigene0005158	67	60	50	0	0	0	4.09	3.31	3.58	0	0	0	3.66	0.001	-11.8376	3.74744e-11	7.60721e-10	--	hypothetical protein PRUPE_2G070800 [Prunus persica]	-	-	-	-	-	-	-
Unigene0000387	36	31	30	173	360	210	1.36	1.06	1.33	5.57	12.74	6.58	1.25	8.29667	2.7306	3.79581e-11	7.70038e-10	TSN1	PREDICTED: staphylococcal nuclease domain-containing protein 1-like [Prunus mume]	-	-	-	-	-	-	-
Unigene0036696	206	237	180	799	451	940	2.26	2.35	2.32	7.46	4.63	8.55	2.31	6.88	1.57452	3.81389e-11	7.73203e-10	LECRK91	PREDICTED: L-type lectin-domain containing receptor kinase IX.1-like [Prunus mume]	-	-	-	-	-	-	-
Unigene0001592	80	121	76	0	1	1	1.32	1.8	1.47	0	0.02	0.01	1.53	0.01	-7.25739	3.86784e-11	7.83124e-10	--	hypothetical protein PRUPE_7G180000 [Prunus persica]	-	-	-	-	-	-	-
Unigene0019366	2848	2921	2326	6894	7518	6046	41.56	38.53	39.9	85.55	102.58	73.09	39.9967	87.0733	1.12235	3.90404e-11	7.89429e-10	--	PREDICTED: protein arginine N-methyltransferase 2 [Prunus mume]	-	-	-	-	-	GO:0003824//catalytic activity	GO:0008152//metabolic process
Unigene0009112	833	729	678	218	225	395	26.77	21.18	25.61	5.96	6.76	10.52	24.52	7.74667	-1.66231	3.98359e-11	8.04474e-10	PR-1	PREDICTED: pathogenesis-related protein PR-1 [Prunus mume]	-	-	-	-	-	-	-
Unigene0013629	1206	1593	1192	370	127	470	16.31	19.47	18.95	4.26	1.61	5.27	18.2433	3.71333	-2.29658	4.09738e-11	8.26918e-10	grip22	PREDICTED: LEAF RUST 10 DISEASE-RESISTANCE LOCUS RECEPTOR-LIKE PROTEIN KINASE-like 2.5 [Prunus mume]	-	-	-	-	-	-	-
Unigene0021319	71	91	34	2	2	3	0.98	1.14	0.55	0.02	0.03	0.03	0.89	0.0266667	-5.0607	4.24133e-11	8.55416e-10	CDF2	PREDICTED: cyclic dof factor 3-like [Prunus mume]	-	-	-	-	-	-	-
Unigene0003688	706	515	542	1937	2524	1836	9.98	6.58	9.01	23.28	33.36	21.5	8.52333	26.0467	1.61161	4.24615e-11	8.55837e-10	CYP75B2	PREDICTED: cytochrome P450 71A1-like [Prunus mume]	Metabolism;Metabolism;Metabolism	Global and overview maps;Global and overview maps;Metabolism of terpenoids and polyketides	ko01100//Metabolic pathways;ko01110//Biosynthesis of secondary metabolites;ko00905//Brassinosteroid biosynthesis	K20623;K20623;K20623	-	-	-
Unigene0010282	44	75	65	0	0	0	2.67	4.11	4.64	0	0	0	3.80667	0.001	-11.8943	4.3543e-11	8.77068e-10	--	-	-	-	-	-	-	-	-
Unigene0026002	88	136	108	27	19	21	1.85	2.58	2.66	0.48	0.37	0.36	2.36333	0.403333	-2.55078	4.41931e-11	8.89588e-10	CYCA3-2	PREDICTED: protein TPLATE-like, partial [Malus domestica]	-	-	-	-	-	-	-
Unigene0017507	37	135	58	0	0	0	0.87	2.85	1.59	0	0	0	1.77	0.001	-10.7895	4.4256e-11	8.90282e-10	N	PREDICTED: TMV resistance protein N-like [Prunus mume]	-	-	-	-	-	-	-
Unigene0000606	0	0	0	99	43	109	0	0	0	6.58	3.14	7.06	0.001	5.59333	12.4495	4.44431e-11	8.93469e-10	--	PREDICTED: TMV resistance protein N-like [Prunus mume]	-	-	-	-	-	-	-
Unigene0035224	370	359	269	99	132	95	10.62	9.31	9.07	2.42	3.54	2.26	9.66667	2.74	-1.81884	4.61412e-11	9.26415e-10	--	PREDICTED: uncharacterized protein LOC101299160 [Fragaria vesca subsp. vesca] [Fragaria vesca]	-	-	-	-	-	-	-
Unigene0000497	55	58	61	0	0	0	1.29	1.23	1.68	0	0	0	1.4	0.001	-10.4512	4.72648e-11	9.48363e-10	TS1	PREDICTED: threonine synthase 2, chloroplastic [Prunus mume]	Metabolism;Metabolism;Metabolism;Metabolism;Metabolism	Global and overview maps;Global and overview maps;Global and overview maps;Amino acid metabolism;Metabolism of cofactors and vitamins	ko01100//Metabolic pathways;ko01110//Biosynthesis of secondary metabolites;ko01230//Biosynthesis of amino acids;ko00260//Glycine, serine and threonine metabolism;ko00750//Vitamin B6 metabolism	K01733;K01733;K01733;K01733;K01733	-	GO:0043168//anion binding	-
Unigene0005729	81	68	36	287	449	313	5.28	4	2.76	15.9	27.35	16.89	4.01333	20.0467	2.32049	4.7642e-11	9.55318e-10	--	-	-	-	-	-	-	-	-
Unigene0024080	53	163	132	0	2	0	1.21	3.36	3.53	0	0.04	0	2.7	0.0133333	-7.66178	5.03078e-11	1.00813e-09	--	PREDICTED: uncharacterized protein LOC103323337 [Prunus mume]	-	-	-	-	-	-	-
Unigene0027620	50	65	58	0	0	0	0.64	0.75	0.87	0	0	0	0.753333	0.001	-9.55714	5.06892e-11	1.01512e-09	--	PREDICTED: uncharacterized protein LOC107427220 [Ziziphus jujuba]	-	-	-	-	-	-	-
Unigene0025697	1301	1379	1061	2819	3583	3189	18.24	17.47	17.48	33.61	46.96	37.03	17.73	39.2	1.14466	5.1358e-11	1.02785e-09	ATG8F	PREDICTED: autophagy-related protein 8f [Prunus mume]	Cellular Processes	Transport and catabolism	ko04136//Autophagy - other eukaryotes	K08341	-	-	-
Unigene0000511	71	105	46	6	0	3	2.86	3.83	2.18	0.21	0	0.1	2.95667	0.103333	-4.83859	5.20454e-11	1.04094e-09	--	PREDICTED: TMV resistance protein N-like [Prunus mume]	-	-	-	-	-	-	-
Unigene0020130	3596	4374	3940	1436	1851	1197	70.7	77.72	91.04	24.01	34.02	19.49	79.82	25.84	-1.62714	5.3103e-11	1.06141e-09	TP7	PREDICTED: isoflavone reductase-like protein [Prunus mume]	-	-	-	-	-	-	-
Unigene0026215	69	100	54	0	4	0	0.67	0.88	0.62	0	0.04	0	0.723333	0.0133333	-5.76155	5.3957e-11	1.07663e-09	--	PREDICTED: disease resistance RPP13-like protein 4 [Prunus mume]	-	-	-	-	-	-	-
Unigene0002084	72	53	60	2	0	3	0.92	0.61	0.9	0.02	0	0.03	0.81	0.0166667	-5.60288	5.39588e-11	1.07663e-09	--	reverse transcriptase [Corchorus capsularis]	-	-	-	-	-	-	-
Unigene0028571	116	158	109	372	308	404	1.8	2.21	1.98	4.9	4.46	5.18	1.99667	4.84667	1.2794	5.46127e-11	1.0888e-09	--	PREDICTED: F-box protein At5g49610-like [Pyrus x bretschneideri]	-	-	-	-	-	-	-
Unigene0004272	3067	3322	2765	1733	923	1661	29.73	29.1	31.5	14.28	8.37	13.34	30.11	11.9967	-1.32761	5.54953e-11	1.10569e-09	--	PREDICTED: flocculation protein FLO11-like [Pyrus x bretschneideri]	-	-	-	-	-	-	-
Unigene0034532	0	2	0	149	118	92	0	0.1	0	6.79	5.91	4.08	0.0333333	5.59333	7.3906	5.60601e-11	1.11623e-09	--	PREDICTED: uncharacterized transmembrane protein DDB_G0289901-like [Prunus mume]	-	-	-	-	-	-	-
Unigene0036825	384	458	326	56	109	135	7.09	7.65	7.08	0.88	1.88	2.07	7.27333	1.61	-2.17556	5.70783e-11	1.13578e-09	At3g05170	PREDICTED: phosphoglycerate mutase-like protein AT74H [Prunus mume]	-	-	-	-	-	-	-
Unigene0013931	0	0	0	116	42	92	0	0	0	4.83	1.92	3.73	0.001	3.49333	11.7704	5.71376e-11	1.13624e-09	Hdac6	PREDICTED: RING finger protein ETP1-like [Prunus mume]	-	-	-	-	-	-	-
Unigene0000216	199	236	185	55	12	30	1.17	1.26	1.28	0.28	0.07	0.15	1.23667	0.166667	-2.89142	5.95254e-11	1.18221e-09	N	PREDICTED: TMV resistance protein N-like [Prunus mume]	-	-	-	-	-	-	-
Unigene0035021	335	344	222	59	8	44	2.12	1.96	1.65	0.32	0.05	0.23	1.91	0.2	-3.2555	6.01139e-11	1.19315e-09	MOM1	PREDICTED: helicase protein MOM1-like [Prunus mume]	-	-	-	-	-	-	-
Unigene0015005	1077	982	791	2762	2609	2171	9.35	7.7	8.07	20.39	21.18	15.61	8.37333	19.06	1.18667	6.07287e-11	1.20458e-09	BOA	PREDICTED: transcription factor PCL1-like [Pyrus x bretschneideri]	-	-	-	-	-	-	-
Unigene0029498	52	68	49	0	0	0	2.44	2.88	2.7	0	0	0	2.67333	0.001	-11.3844	6.1517e-11	1.21944e-09	--	PREDICTED: disease resistance protein RGA2-like [Prunus mume]	-	-	-	-	-	-	-
Unigene0027433	68	54	49	0	0	0	5.61	4.03	4.75	0	0	0	4.79667	0.001	-12.2278	6.24929e-11	1.238e-09	--	PREDICTED: LOW QUALITY PROTEIN: probable methyltransferase PMT14 [Prunus mume]	-	-	-	-	-	-	-
Unigene0021561	73	70	37	0	0	0	5.62	4.87	3.35	0	0	0	4.61333	0.001	-12.1716	6.38884e-11	1.26404e-09	--	PREDICTED: LOW QUALITY PROTEIN: putative disease resistance RPP13-like protein 1 [Prunus mume]	-	-	-	-	-	-	-
Unigene0036460	1198	798	627	351	287	362	15.51	9.34	9.54	3.86	3.47	3.88	11.4633	3.73667	-1.6172	6.65683e-11	1.3154e-09	SPX4	PREDICTED: SPX domain-containing protein 4 [Prunus mume]	-	-	-	-	-	-	-
Unigene0024919	6	0	4	125	86	76	0.08	0	0.06	1.37	1.04	0.81	0.0466667	1.07333	4.52356	6.80704e-11	1.34338e-09	--	PREDICTED: uncharacterized protein LOC103327218 [Prunus mume]	-	-	-	-	-	-	-
Unigene0015125	104	151	112	34	23	20	10.42	13.67	13.19	2.9	2.15	1.66	12.4267	2.23667	-2.47402	6.9473e-11	1.37019e-09	--	-	-	-	-	-	-	-	-
Unigene0025959	0	0	0	67	53	100	0	0	0	1.13	0.98	1.64	0.001	1.25	10.2877	6.96765e-11	1.37334e-09	CAD1	PREDICTED: probable cinnamyl alcohol dehydrogenase 1 [Fragaria vesca subsp. vesca] [Fragaria vesca]	Metabolism;Metabolism;Metabolism	Global and overview maps;Global and overview maps;Biosynthesis of other secondary metabolites	ko01100//Metabolic pathways;ko01110//Biosynthesis of secondary metabolites;ko00940//Phenylpropanoid biosynthesis	K00083;K00083;K00083	-	-	-
Unigene0025119	262	300	187	608	716	752	3.73	3.86	3.13	7.36	9.54	8.87	3.57333	8.59	1.26539	6.99623e-11	1.37716e-09	CGT	PREDICTED: LOW QUALITY PROTEIN: UDP-glycosyltransferase 708D1-like [Prunus mume]	-	-	-	-	-	GO:0016740//transferase activity	-
Unigene0000351	2	7	1	101	58	85	0.1	0.3	0.06	4.11	2.6	3.37	0.153333	3.36	4.45372	6.99708e-11	1.37716e-09	--	-	-	-	-	-	-	-	-
Unigene0009871	52	61	53	0	0	0	1.08	1.15	1.3	0	0	0	1.17667	0.001	-10.2005	7.00029e-11	1.37716e-09	--	-	-	-	-	-	-	-	-
Unigene0023612	7017	6025	5104	25189	12287	19551	391.88	304.11	335.03	1196.18	641.56	904.42	343.673	914.053	1.41124	7.01251e-11	1.3787e-09	--	-	-	-	-	-	-	-	-
Unigene0015420	7	2	4	88	57	105	0.73	0.19	0.49	7.83	5.57	9.1	0.47	7.5	3.99616	7.1957e-11	1.41383e-09	SBT4.14	PREDICTED: cucumisin-like [Prunus mume]	-	-	-	-	-	GO:0070011//peptidase activity, acting on L-amino acid peptides	GO:0019538//protein metabolic process
Unigene0008041	346	549	348	141	165	178	5.94	8.52	7.03	2.06	2.65	2.53	7.16333	2.41333	-1.5696	7.23019e-11	1.41882e-09	PGR5	PREDICTED: protein PROTON GRADIENT REGULATION 5, chloroplastic [Prunus mume]	-	-	-	-	GO:0031976//plastid thylakoid;GO:0044434//chloroplast part	-	GO:0006950//response to stress;GO:0009639//response to red or far red light;GO:0009642//response to light intensity;GO:0009767//photosynthetic electron transport chain;GO:0034285//response to disaccharide;GO:0043269//regulation of ion transport
Unigene0015017	54	86	45	665	182	1058	0.84	1.21	0.82	8.78	2.64	13.61	0.956667	8.34333	3.12454	7.26111e-11	1.42397e-09	--	PREDICTED: protein NtpR-like [Prunus mume]	-	-	-	-	-	-	-
Unigene0025435	106	85	75	0	0	2	2.35	1.7	1.96	0	0	0.04	2.00333	0.0133333	-7.23122	7.26555e-11	1.42397e-09	--	hypothetical protein PRUPE_ppa021946m2g, partial [Prunus persica]	-	-	-	-	-	-	-
Unigene0009620	103	71	72	309	354	325	1.66	1.03	1.36	4.23	5.33	4.33	1.35	4.63	1.77805	7.39209e-11	1.44786e-09	AGAL1	PREDICTED: alpha-galactosidase 1-like [Prunus mume]	Metabolism;Metabolism;Metabolism;Metabolism;Metabolism	Global and overview maps;Lipid metabolism;Carbohydrate metabolism;Lipid metabolism;Glycan biosynthesis and metabolism	ko01100//Metabolic pathways;ko00561//Glycerolipid metabolism;ko00052//Galactose metabolism;ko00600//Sphingolipid metabolism;ko00603//Glycosphingolipid biosynthesis - globo and isoglobo series	K07407;K07407;K07407;K07407;K07407	GO:0005576//extracellular region;GO:0005618//cell wall	GO:0004557//alpha-galactosidase activity	GO:0044238//primary metabolic process;GO:0045229//external encapsulating structure organization;GO:0071704//organic substance metabolic process
Unigene0000165	192587	226849	175243	90413	114811	101661	5995.6	6382.79	6412.3	2393.41	3341.76	2621.52	6263.56	2785.56	-1.16901	7.41701e-11	1.45183e-09	--	abscisic acid stress ripening protein homolog [Prunus mume]	-	-	-	-	-	-	-
Unigene0026310	0	0	0	101	55	65	0	0	0	1.63	0.98	1.02	0.001	1.21	10.2408	7.43254e-11	1.45396e-09	--	-	-	-	-	-	-	-	-
Unigene0034474	265	304	211	61	11	45	4.25	4.41	3.98	0.83	0.17	0.6	4.21333	0.533333	-2.98185	7.46918e-11	1.46021e-09	AtMg00750	PREDICTED: LOW QUALITY PROTEIN: uncharacterized protein LOC103404019 [Malus domestica]	-	-	-	-	-	-	-
Unigene0006735	159	141	126	534	339	466	1.36	1.09	1.27	3.89	2.71	3.31	1.24	3.30333	1.41358	7.50416e-11	1.46613e-09	At1g55660	PREDICTED: F-box/FBD/LRR-repeat protein At1g16930-like [Prunus mume]	-	-	-	-	-	-	-
[truncated: 3,471 more rows]

## Sheet: C2-vs-D2.filter.annot
id	C2-1_count	C2-2_count	C2-3_count	D2-1_count	D2-2_count	D2-3_count	C2-1_rpkm	C2-2_rpkm	C2-3_rpkm	D2-1_rpkm	D2-2_rpkm	D2-3_rpkm	C2_mean	D2_mean	log2(fc)	PValue	FDR	Symbol	Description	KEGG_A_class	KEGG_B_class	Pathway	K_ID	GO Component	GO Function	GO Process
[truncated: 6,696 more rows]

[truncated: 2 more sheets: C3-vs-D3.filter.annot-gene, Veen results]
